# Supplementary material for: Recombination of ecologically and evolutionarily significant loci maintains genetic cohesion in the Pseudomonas syringae species complex
Source: Genome Biol. 2019 Jan 3;20:3. doi: 10.1186/s13059-018-1606-y (PMC6317194; doi:10.1186/s13059-018-1606-y)
Supplement: Supplementary file 6 — Putative novel type III secreted effectors. This file contains the annotations for the 6264 P. syringae gene families that contained a characteristic N-terminal secretion signal and an upstream hrp-box promoter but were not classified as type III secreted effectors in our blast analysis of known effector families. (XLSX 2935 kb) [file 13059_2018_1606_MOESM6_ESM.xlsx]

## Sheet: Supplemental_Dataset_S5
Species Information			Gene Information											Promoter Information
Species Name	Phylogroup	Strain Name	Gene_Id	Ortholog Cluster	GO Annotation	Contig	Strand	Gene Start	Gene End	Length (Nuc)	Length (AA)	Gene Sequence (Nuc)	Gene Sequence (AA)	Promoter Distance (Nuc)	Promoter Strand	Promoter Start	Promoter End	Promoter Sequence (Nuc)
Pseudomonas syringae	1	Pap1089_5	Pap1089_5|ALQ49_00061	Cluster_3390.2	Type III secretion related protein	Pap1089_5_Contig_1	+	79957	80451	495	164	ATGACCAACAATGACCAGTACCACACCCTTATCAACGAAATCTGCGCACTCAGCCTGATTTCCACACCTGAACGTTTCTATGAATCTGCCAATTTCAAAATCAGCGAAGTGGACTTCACCCTGCAGTTTCAGGACCGCGACGAAGGCCGTGCCGTTCTGATCTACGGTGACATGGGCGCGTTGCCCGCGCGCGGCCGTGAGAGCGCGTTGCTGGCGTTGATGGACATCAACTTTCATATGTTCGCGGGTGCCCACAGCCCGGCATTTTCCTTTAATGCGCAGACCGGTCGTGTGCTGCTGATGGGCTCTGTGGCCCTTGAACGAGCCTCTGCCGAAGGCGTGCTGTTGTTGATGAAGTCGTTTTCCGACCTGGCCAAAGAGTGGCGCGAGCATGGGTTC…	MTNNDQYHTLINEICALSLISTPERFYESANFKISEVDFTLQFQDRDEGRAVLIYGDMGALPARGRESALLALMDINFHMFAGAHSPAFSFNAQTGRVLLMGSVALERASAEGVLLLMKSFSDLAKEWREHGFMGQATTVGASTDQPVAPAAKRESLSAPGRFQ	57	+	79868	79900	AGGAACTGAAATGCCTATGCCTGCGACTCAGTG
Pseudomonas syringae	1	Pap1089_5	Pap1089_5|ALQ49_00069	Cluster_4702.2	Type III secretion related protein	Pap1089_5_Contig_1	+	93669	94787	1119	372	ATGCAAGCACTTAACAGCATCAGTTCGTTGCAAACCTCTGCATCATTGTTCCCCGTGTCGCTCAACAGCGATGTGAGCGCCAACACCAGCACTTCCAGCAAAGAGCTCAAGGCTGTGATCGATCAGCTGGTTCAGGCGCTGACCCAAAGTGGGCAGCTCGATGAAACCTCACCGCTCGGCAAAATGCTCGCCAAGGCCATGGCTGCGGATGGCAAGTCGGCTAACAGCATCGATGACATCACTGCATCGCTCGACAAGCTGATCCACGAAAAGCTCGGCGACAATTTCGGTGCCTCTGCCGGCATCGGCGCGGGTGGCGGTGGCGTTGGCGGTGGCATTGGCGGGGCGGGTTCTGGTTCGGGTGTCGGTGGCGGTCTGAGCAGCGACGCGGGTGCCGGG…	MQALNSISSLQTSASLFPVSLNSDVSANTSTSSKELKAVIDQLVQALTQSGQLDETSPLGKMLAKAMAADGKSANSIDDITASLDKLIHEKLGDNFGASAGIGAGGGGVGGGIGGAGSGSGVGGGLSSDAGAGQSDLMSQVLNGLGKAVLDDLLTPSGEGGTTFSSDDMPTLEKVAQFMDDNKAQFPTRDGGSWMNELKEDNGLDAQETAQFRSALDVIGQQLGQQQGDASGVTSGGGLGSPVSDTSLGNPAIDANTGPAANGNASVDVGQLIGQLIDRGLQSVSSGGGLGTPVDNSTQPAGGTPAANPTGNVSNQDLGQLLSGLLQRGLEATLQDAGNTGADLQSSAAQVAAQLINALLQGTNNQTNQAVA	442	+	93195	93227	TGGAACCGATTCGCAGGCTGCTGCCACCTAGTG
Pseudomonas syringae	1	Pap1089_5	Pap1089_5|ALQ49_00070	Cluster_28714.2	Type III secretion related protein	Pap1089_5_Contig_1	+	94815	95189	375	124	GTGACCATTTCCCAACTCAGCAATTTGAAAAGTGTATCGCCGGAGCTTGGGCAGAATGCTCATCAGGGGCTCGGCTCCGAACCCGTTCAGGCGGATGTCGACCTATTCAATGCGGCGATGCGCCCTGACAGCGGGCCCGCAGCGTCGCACCTGTCCGACCGGATAGCCAGTGCGCTGTCCGAGCGGCTGGGCAGTACCGAGAAGCTTTCACAGCAAGCATTACGCCAGATGAAGAAAGTGTCGAACACCGAAGATCCTGGAGACATCGTGCAGATGAGTCGGGCGTTGTCGCAGTGCTCGTTGCAAATGGCGTTGACGACCAAGGTCGTGAGCAAGAGCGCTCAGGCGCTCGACAAGTTGACCAACCTGCAGTAG	MTISQLSNLKSVSPELGQNAHQGLGSEPVQADVDLFNAAMRPDSGPAASHLSDRIASALSERLGSTEKLSQQALRQMKKVSNTEDPGDIVQMSRALSQCSLQMALTTKVVSKSAQALDKLTNLQ	1588	+	93195	93227	TGGAACCGATTCGCAGGCTGCTGCCACCTAGTG
Pseudomonas syringae	1	Pap1089_5	Pap1089_5|ALQ49_00072	Cluster_2413.3	Type III secretion related protein	Pap1089_5_Contig_1	+	96001	96531	531	176	ATGATGAGCCTTTCTGCCGAGGATCACTGGATTCACTGGTGGTGCAACCCCTGGCAGTGGGCTCATTCGCAGTGGCATGACCGATTCGCCAACGCTCGTGGGTTATCGGTCAGTGACTGCGATGCGCTCATGGCCAGCCGTCATGGCGTGTTTCTGCAGAGTCTGGGCATTGACCCGGCTCAGCCGCCAGCGCCCGCGGAACCGGTGCTGCGCTGGTTGGCGCTGACGCCCTCGCAGCGTGAGCAGGCGCTAAGCCTGGCGCAGTGCATCTGCTTCTCCCGTAACGAAAGCGACGGCCCTGACGGTCAATGGTGCTGGGGATTGACCAAAGCGCTGCGCCCCGGTGTCTGGCTGGAGTTTGAACACGAGGACGCGCGTCTTCTGCTGGGCGCCTGGCTT…	MMSLSAEDHWIHWWCNPWQWAHSQWHDRFANARGLSVSDCDALMASRHGVFLQSLGIDPAQPPAPAEPVLRWLALTPSQREQALSLAQCICFSRNESDGPDGQWCWGLTKALRPGVWLEFEHEDARLLLGAWLGPQYWSRLRLEWPPNEVPDTPGKAPENKLQALWQAIMWRVTAA	2774	+	93195	93227	TGGAACCGATTCGCAGGCTGCTGCCACCTAGTG
Pseudomonas syringae	1	Pap1089_5	Pap1089_5|ALQ49_00074	Cluster_49085.1	Type III secretion related protein	Pap1089_5_Contig_1	+	97243	97467	225	74	ATGATCAGTTTCAACAGCTTGCAACGCCATCTCGACAACTCGGTGAGCCGTGCTCACACCAACATGGACCAGGCAGCGATGGAAGCCTCCGAGAGTGGTACCGTCGAAGACCTGCAGGCATTCAACGATGCCCAGCAGCAGGTCGATGTCGCCGGTATTGCCGTCAATGAATGCCTGCGTGCCAAGCACGGTATCAATAAAGCAGTCATCGATGGAATTCAGTGA	MISFNSLQRHLDNSVSRAHTNMDQAAMEASESGTVEDLQAFNDAQQQVDVAGIAVNECLRAKHGINKAVIDGIQ	30	+	97181	97213	TGGAACCGCTCGGCGGGTTTGCTCCACTCAAGG
Pseudomonas syringae	1	Pap1089_5	Pap1089_5|ALQ49_00084	Cluster_3403.1	Type III secretion related protein	Pap1089_5_Contig_1	-	104995	105564	570	189	ATGACCGCACCGATCAAAACCCCGGCCAAAGCGCCACCAGCCCCCCAGCGCTCTGCGCCTGTCGAGCGGCCAGCCACAGCTCTGAGCGAAAAACCATTCGGTGAAAAACGCCTTGCATCCGGTGGCCTGGGCCGTGGCGATGTACAGACCAGCCGTTCGGTACTGAGCAAGCCGCTGCAAGACACCCCGATGAGTGCCGACGGCATGTTCTTTTCGCAACTGCTGGTGCCGCCCGTAAGTGCCGAACCTGGTCAGCAAGGCTTTGGCGGGGGCGGTATAGCCTTTCCGGTACGCGCAGAACAAGTGCCGACCCAACTGATCGACGAGCTGGCGCAGCGCCTGCCGGATCAGCCTGACGGCCCCCTCAGTTTCACCCTGCTGATGCCCAACCTGGGCAGC…	MTAPIKTPAKAPPAPQRSAPVERPATALSEKPFGEKRLASGGLGRGDVQTSRSVLSKPLQDTPMSADGMFFSQLLVPPVSAEPGQQGFGGGGIAFPVRAEQVPTQLIDELAQRLPDQPDGPLSFTLLMPNLGSVRVNANKTENRWSVQLGFARRDVLKRLSAHTGACRDSLSQALGQDVELDMHEDLSA	6048	-	111612	111644	GGGAACTGATCCGGGACCGTGACCCACTCAGCG
Pseudomonas syringae	1	Pap1089_5	Pap1089_5|ALQ49_00089	Cluster_4852.1	Type III secretion related protein	Pap1089_5_Contig_1	-	110479	111585	1107	368	ATGAAAATCGTCGCTCCGCCTATCATGCGAATACTTCCGGTCGCGCCGACCCGCGTCGTGACGCCTGCTGCGCAGCCACTTCCCAATGCTGATCTGCACAATTCAGGGACTTCGCCACAACAGGTTTCGCGCTTCGCGGCCGCGCTCATCCAGCACAGACGCATCCTCATTCAGCGCGACCTGATCGCCAGCAACAATGCCTTGCAGTCGCGAGCGGTGAAGCTCGGTGAGCTTTATCAACTGCTGATGACCGATCAGGACACCGGGCTGGATAACGCGGCCAGGGTATTGCGCAAAAAGCTCATGCAGGATGACTCGTCCTCAGATCTGAAACAGGTTCTGGATTACACCGACGGTGATGCCGCCAAGGCTCATGTGGTGTTGCAAGCCGCCAGGAAG…	MKIVAPPIMRILPVAPTRVVTPAAQPLPNADLHNSGTSPQQVSRFAAALIQHRRILIQRDLIASNNALQSRAVKLGELYQLLMTDQDTGLDNAARVLRKKLMQDDSSSDLKQVLDYTDGDAAKAHVVLQAARKQAEADGEMGEHVVLTQQLKQLRRKYGPRARAGINSAKAFARPNIDNKRRVALRNLYSVAVSGQPNITGLIEALLGEQQEAGQFNIDLRDMRTAIADDLSAMTPSASHEQLRTLMHGLNTARHVTTLLKGCEHLLGRMRNKNPDLTVDPPAFLKHLLTLTANGMNVNQTLQLTQHIGGKQLKHQLAFLNGLRPMLLQLPILLWRDMKSRQTALSNLLILMAELTTQEQKQLYGGLV	27	-	111612	111644	GGGAACTGATCCGGGACCGTGACCCACTCAGCG
Pseudomonas syringae	1	Pap1089_5	Pap1089_5|ALQ49_00091	Cluster_477.1	Type III Effector	Pap1089_5_Contig_1	+	112470	114812	2343	780	ATGCGTATATCCAGTTCTCCCTTCGTTATCGTGAACCAACCCACCCCTGGCGAACTGGCTCTGGCTGTTGAGTCGCCTCTTGCCAAAGCCTTGCCGACACCTGCGGGTGGCGGTGGGCAAGCCGGCGTGCAGTTCGGTCAGCCGGCCGGCAACACGCAAGGCGCGCCGACAGGAGCCGAGCAGACCGCGTCGTCTATCCTGGCTCTTTTGCTCCAGGGCAGTGGCGGGGCAGCTGCCAATGCCAATGTGAATAATCAGGTCCAGCCGCAACCCTGCGCAGATTCTCCTGCCGAGGCTGCACCGACTGAAGCGACTGCCCCGGCCGCTCCGGTTGAACAGGTCGCAGCTCCCACGAACACAGATGCAACCGACGCTTCCAACGCCCCCAAAGCCGCAGAC…	MRISSSPFVIVNQPTPGELALAVESPLAKALPTPAGGGGQAGVQFGQPAGNTQGAPTGAEQTASSILALLLQGSGGAAANANVNNQVQPQPCADSPAEAAPTEATAPAAPVEQVAAPTNTDATDASNAPKAADAAFLDNSEYSSPEALKRWEPMVAHLPPEEREQAAKELNRPIAAAWMARDDGPDAGKAMDFINANPALKTAVDVAQGGGNADGKITNKDLKTFAKNMEKAADSADKDLANYTKDNPDADPQSLEMVRSAAVMRANMPLAIAADPHHAVDAADKTKVDGNVDAEDLKGLAQSNPGLSGALKQSCSTWSQPGFLGQVDEAGMSGRKKAAHSPDKMFDAKNLSEWIKKSAPTNGGQFASMLSDSATLNAVAGIDISKLDKDVFDKPKSYS…	32	+	112407	112438	TGGAACCAACTTGCACCTTCAACCACACAGTT
Pseudomonas syringae	1	Pap1089_5	Pap1089_5|ALQ49_02754	Cluster_4422.1	Type III secretion related protein	Pap1089_5_Contig_38	+	117651	118625	975	324	ATGACCATGGGTGTTTCACCTATTCGTAACTCAAACTCCCTACCGATCGATTTTTCGTCGTTGAGCGCAAAGAGTGGCGGGCATAACGGGCTGGGCAGCGGAGACAATTCGACTATCGACCCGAGTACGTTGTTGTTCGGCAATCAAGGGCAGACGCAGGTCAATTTCGCTCCGCCCAACAGCACGGACTCCTCAACCAGCGGTGTGAACGCTGCGTCAGGCAATACGGCGTCCGGCCTGGTCGAGCAAATCATGAGCCTGCTGAAACAATTGATGCAGATGCTGATGCAAAACAACAATGCTTCCGGTAACCCTCAGACTGATTCGTCAACGCCAGGCGTCGGCAGTGGCAACAGCGTCGGGAGCGGCGGTACTGGAAGCAGTCTCGCAGGCAGTGAC…	MTMGVSPIRNSNSLPIDFSSLSAKSGGHNGLGSGDNSTIDPSTLLFGNQGQTQVNFAPPNSTDSSTSGVNAASGNTASGLVEQIMSLLKQLMQMLMQNNNASGNPQTDSSTPGVGSGNSVGSGGTGSSLAGSDGGDETSGVGNGGLGDAGSTPTTSAADGVPSDTSLTGSGGLHLPQQLEQYRGDIMDAAKATGLTPSVIAGQIWAESRGQLNAATTNVNGKADAGLMQVNADTFKSLQQQNPGLLGNDVNDSHTNIMAGALYLRDQNKEFGDMGAALRAYNSGPDKVNKADLSDTGGVGGSSYPADVLNFAKIIESGQGNLPA	89	+	117531	117562	GGGAACCGAGTCACTCAGTGAACCACTCAGTT
Pseudomonas syringae	1	Pap1089_5	Pap1089_5|ALQ49_02797	Cluster_9017.1	Type III Effector	Pap1089_5_Contig_4	+	25433	26110	678	225	ATGATCAATAGCATCCGTGGCGGAGCGGGCACATCGGCCTATCACACCCAGCCCCAGCCATTTGATGAGTTGAAACTGAACCCTGAAGTCATTGAGAAAAAGACGGAAAGACTCAAGGATAAGGGATATTTCAGCGTTCGTATGTCGGAGCCTACGAAAAGCTATTTGCATCAGCGAAGCACGCTCAGCAATCCCGCATGGCGAAACCAGACCGTAGGACAAGTCATAGACTTGAAGGGAACGGACTATGAGCGCTCGGTCACGGCAGTGGCAAAAGACATTGCAACGAGACTTACCGGGAAACAGGAACAACTGAAACCACAAGAATTTCAGCTGCGGCGGGCCAAAAATCAGGGGGCGGATAAATGGCACCAGGATAAGGAGCCGAAAAAGGTCATC…	MINSIRGGAGTSAYHTQPQPFDELKLNPEVIEKKTERLKDKGYFSVRMSEPTKSYLHQRSTLSNPAWRNQTVGQVIDLKGTDYERSVTAVAKDIATRLTGKQEQLKPQEFQLRRAKNQGADKWHQDKEPKKVICIATVEGRGTEFIKPSESKKLFETGEYAEMIPKNAEADAQKTAEAIAQKTNEAKKDRFYFFAGKGITEESIPKLVHRSPHESGRAIFMARWK	91	+	25310	25342	CGGAACCGCTCTTCAACTGGTTGCCACCAAGGC
Pseudomonas syringae	1	Pap1089_5	Pap1089_5|ALQ49_03044	Cluster_452.1	Type III Effector	Pap1089_5_Contig_41	+	10617	16490	5874	1957	ATGGTCAAGGTTACCTCTTCCGGATTTACTGCCAACCCTCTCTCTCATCATGCGGACAGTGTTTCCCCCGCGAACAGTCCCCCTCAGTTACCGGAGCCTGTGCCTCTGGTTGATCTAAGCGAGTCGTCCCGCAAGGGCGGCATGCGAAATCGGCCGCATGCCAGTTTGAACAGTCAGGTGCTCGGACTGCAAGCGGTGCCGTCGCAACGTGGAAAACATGTTCGTGTCAGAAGTCATGCCGATGGCGAGAGTGTCATTAATGCCTGGCTGGCAAAGCGCCCCTCGGTTCAAAGCGAAACCAGTCTTGATAACGATGGCAAACTGGTGCGTTACACCCCCGTGAATCATGAGCCGCTGGCGCCGCGCAATGAGGCGTTTTTCACCTCTGTGCCGGGGATG…	MVKVTSSGFTANPLSHHADSVSPANSPPQLPEPVPLVDLSESSRKGGMRNRPHASLNSQVLGLQAVPSQRGKHVRVRSHADGESVINAWLAKRPSVQSETSLDNDGKLVRYTPVNHEPLAPRNEAFFTSVPGMLMAVLTVHPEMEHGISGDITADAVAARLAEPPIGLLTGIWQSSHDRAYLERGGVVHTANMEERWAPLTLPGINPREPLRMAGLQADGGVYLHNGSQLWRLTETAAESVTTEKLPEGAAVRIGAGGEVHGLHEGALHSNGISRPIELWRPKAGAPGREQSPARPVDLLPLPGGTAALILDDKGRIYHADLKGTGAVEAHRLKLPADFAQGKGWAVTAMGLSRDDTVHLMLQDQNGRRMSLQRAPGEALFRPAYLLDRPLLLLYTEGL…	173	+	10413	10444	CGGAACCGATCCGGTTGCCTGGCCACTCAATT
Pseudomonas syringae	1	Pap1089_5	Pap1089_5|ALQ49_03181	Cluster_2089.1	Type III secretion related protein	Pap1089_5_Contig_42	+	65007	65399	393	130	ATGAACTCATCCTCCACTCTACAAAAGCTGCTTGATAGGCGTGGTCAGGCGGCCAACGGAAATTCTGCGACACAGGCCATACAGTGGCAGGAAGGAATGAACCTCACGCTGCATGTGAACGGCGATAGCCTCACGATGTTGGCCGAGATCATCGATCTGCGTGCCGACCCTCAGGACGACATCCTCTTGCGCAAGCTGCTTGCCCATGCTTTTCCGGGCATGCGGCTACGACGCGGCGCGTTGACCATCAACCCGGACGAGAACACGTTGGTGTACTCCTACGAGCATGACTTTCTCGCGCTGGACAAGGCCCGATTCGAAAATCTGCTGGCTAATTTTGCCGAAACAACGCAGGAGTTGCGTAATACCGCGCAGCGCCTGCGTTACCGCTGA	MNSSSTLQKLLDRRGQAANGNSATQAIQWQEGMNLTLHVNGDSLTMLAEIIDLRADPQDDILLRKLLAHAFPGMRLRRGALTINPDENTLVYSYEHDFLALDKARFENLLANFAETTQELRNTAQRLRYR	29	+	64945	64978	TGGGAACCACAGCGTGCGTTCCAGCCACTCACCG
Pseudomonas syringae	1	Pap1089_5	Pap1089_5|ALQ49_03182	Cluster_16023.1	Type III Effector	Pap1089_5_Contig_42	+	65411	66562	1152	383	GTGTTGAACAAGATCAACCCTGCCATACAAGCCGCTGCACCTCAGGCGGTTGAGGGACCTGAAAGCCCCGCACCCATGCGACTGGATGCTGCGCAAGGTCAGCGGCCTCTTCCGCCGATGGACGCGCCATCTTCGCTGCGCTTGCGAGCATCAGCCGCGCCCGCAAGCGAGCAAAATCGCGCGAGTACCTCAACATCCGACAGCGCGGCAATAGATGAAGCTGATCCCGCGCCTGATCGACGAGAATCGAATATCAACCCCATCAAGCTTGCTGTTCAGATGATGGTGGGCTTTCTTTCCTTGAGCTCCGCGTATCGGATGGCGAGATTTCCAGGAGACTTTGCGAAAGATCCGGGAGGCAGTCTGTGGGCCGCGATCAATCTCCAGCATCGTTCCTCG…	MLNKINPAIQAAAPQAVEGPESPAPMRLDAAQGQRPLPPMDAPSSLRLRASAAPASEQNRASTSTSDSAAIDEADPAPDRRESNINPIKLAVQMMVGFLSLSSAYRMARFPGDFAKDPGGSLWAAINLQHRSSPADLVKGNQTVLERFGAHIPKDSKCFKAKADVTHDIPSGVAGQWNFKTRRVKLNPNIAFESHPANIAGHEFIHCYTHPEFRGRHIDHRHWKALNEGLTTHLTEKLPTPKRLLPIPLAKDPYHGFKLATGDSWPAAAKRIEGAVGEDTLLKAFFGGDDDAISEVAKAAAQIYPRLASSRTEQELYRAGMMRGSQQLAECYAGALLARRPAFARALVTQYASGVQFLGHAARAGQKSAIASGAEPRANGHHI	433	+	64945	64978	TGGGAACCACAGCGTGCGTTCCAGCCACTCACCG
Pseudomonas syringae	1	Pap1089_5	Pap1089_5|ALQ49_03628	Cluster_2333.2	Type III Effector	Pap1089_5_Contig_5	-	156624	157487	864	287	ATGAACATAACGCCGCTCACGTCAGCCGCGGGCAAGGGCTCGTCCGCACAAGGCACAGACAAAATTTCCATTCCCAACTCCACGCGCATGATCAATGCCGCTTCAATCAAGTGGTTGAATAAGGTGCGTAGCGCCATCAGTGACCACATCCGCACCAGCATCGAGAAAGGGAAACTGTTCGAGCTCGCCTCCTTGGGCAGCAACATGTTCGGTGTCCCGGCCCTTTCAGCGCGCCCCTCGACGCTCCAACCTGTGTTGGCGTTTGAGGCTGACCCCAATCACGACCTGAACCTTGTCAGGGTCTATATGCAGGACAGCGCCGGCAAGCTCACTCCCTGGGACCCGACGCCCAACGCGGTCACGACGACGTCGAATCCATCAGAGCCTGACGCGCAAAGC…	MNITPLTSAAGKGSSAQGTDKISIPNSTRMINAASIKWLNKVRSAISDHIRTSIEKGKLFELASLGSNMFGVPALSARPSTLQPVLAFEADPNHDLNLVRVYMQDSAGKLTPWDPTPNAVTTTSNPSEPDAQSDTASSSLPRLPPASSVLSLLGIALDHAQRHSPRADRSAKGRPGREERNGARFNAKQTKPTEAEAYGDHQTPNPDLHRQKETAQRVAESINSMREQQNGMQRAEGLLRAKEALQAREAARKQLLDVLEAIQAGREDSTDKKISATEKNATGINYQ	22	-	157509	157540	AGGAACTCATCACCGCGAATCGCCACTCAGCA
Pseudomonas syringae	1	Pap1089_5	Pap1089_5|ALQ49_04393	Cluster_15257.1	NA	Pap1089_5_Contig_64	+	3242	4402	1161	386	GTGGACTCCGAAGAAAACACTCCATCTCAAAGTACCCCTATTCCTGAGAGCACGTTCAAAGTAACGAGCGAAATGTGCGAACGTTTAGTGCGTTCTGAACGTAAGCACAGACGGAGAGAGCGTTGGATTCGTCGATGGGAACTCAATCGATTTTTCTGGTTTCTGGATGAATTTCCAAGCCAAGAAATTTACAGGCCGTTCAGCGAAGACCGCAGGAACACGCGTCAGGAGATGGCTTACCATCGCCTCCGCCAAGTAACGAGCTGGACGTATTGGTCTCATATGAAGTCCGTCACAGGCCTTAAATTTGCGGCTGCTGGCGGATTGATAAGTGCTTTTTTCCAGGCAGCACTGGGCTTGAGGCCAGCACAAGCAGCGTCTGAACCTTTGGGATGGCTA…	MDSEENTPSQSTPIPESTFKVTSEMCERLVRSERKHRRRERWIRRWELNRFFWFLDEFPSQEIYRPFSEDRRNTRQEMAYHRLRQVTSWTYWSHMKSVTGLKFAAAGGLISAFFQAALGLRPAQAASEPLGWLLIAALLYVMAVLWFEFRCPNLLKRALNKDEGYLGIEGRRWLLALVEDELRRWWAVTPYWPNVRDLDPDSSADQTVLGIMGGYGVPAFSGFSVQACAHIEKALYEYALVTSATIWRRDDFPTRFARLSPGYIMPSGRRPLMHRLHISRLSDLDANDVEGAKEGELVLRWFKSSVGIQHTLRKPKNVDMRWEAEGIARLFERDESALAFTKIIASWQNTMRPWSRLLLMLLFLASAGSFCWFVYLQVRFMIPTLM	1681	+	1523	1561	TGGAATTGAAGTGTGGCACTGCTGTGCGGCCACTCAGTA
Pseudomonas syringae	1	Pap1089_5	Pap1089_5|ALQ49_04746	Cluster_4528.1	Type III secretion related protein	Pap1089_5_Contig_1	-	78407	79651	1245	414	ATGAGCATCGGCATTACACCCCGGCCGCAACAGACCACCACGCCACTCGATTTTTCGGCGCTAAGCGGCAAGAGTCCTCAACCAAACACGTTCGGCGAGCAGAACACTCAGCAAGCGATCGACCCGAGTGCACTGTTGTTCGGCAGCGACACACAGAAAGACGTCAACTTCGGCACGCCCGACAGCACCGTCCAGAATCCGCAGGACGCCAGCAAGCCCAACGACAGCCAGTCCAACATCGCTAAATTGATCAGTGCATTGATCATGTCGTTGCTGCAGATGCTCACCAACTCCAATAAAAAGCAGGATGCCAATCAGGAGCAGCCTGATAGCCAGGCTCCTTTCCAGAACAACGGCGGGCTCGGTACACCGTCGGCCGATAGCGGGGGCGGCGGTACA…	MSIGITPRPQQTTTPLDFSALSGKSPQPNTFGEQNTQQAIDPSALLFGSDTQKDVNFGTPDSTVQNPQDASKPNDSQSNIAKLISALIMSLLQMLTNSNKKQDANQEQPDSQAPFQNNGGLGTPSADSGGGGTPDATGGGGGGDTPSATGGGGSGSGGTPTATGGGSGGTPTATGGGEGGVTPQITPQLANPNRTSGTGSVSDTAGSTEQAGKINVVKDTIKVGAGEVFDGHGATFTADKSMGNGDQGENQKPMFELAEGATLKNVNLGENEVDGIHVKAKNAQEVTIDNVHAQNVGEDLITVKGEGGAAVTNLNIKNSSAKGADDKVVQLNANTHLKVDNFKADDFGTMVRTNGGKQFDDMSIELNGIEANHGKFALVKSDSDDLKLATGNIAMTDVK…	122	-	79773	79803	GGGAACCGGTCGCTGCGCTTTGCCACTCACT
Pseudomonas syringae	1	Pap1089_5	Pap1089_5|ALQ49_04904	Cluster_988.1	NA	Pap1089_5_Contig_14	+	204784	205911	1128	375	GTGTCGGGTCGGTGCTGTGCATTTCCAGCAAGTCTTCACGGACAGTTTTCTGTTTCATCTGCCACTGACGGCGAGCCACTTTGGGTGTTTTTGATAATGTGGGGCATGGATTTGCGAGGGTTTTACAGGATTGCAGCGTGCCTTGTGTTGCTGCTGTGTGGTGGCTGTGGCCAGGAGCGCAAGCTGGAGAGCTTTGGCGGGCCAACCATGGGCAGTCACTATTCAGTGGTGTATGTCCGCGGTGCCGGGCAGCCTGACCCGGTGGTAATGCGCCCGGAGGTCGAAGCCATTCTGGCTGACGTCGATCAACAGATGTCGCTGTGGCGCAGTGACTCGGACATTGAGCGTTTCAATGCGCTGCCAGCCAACAGCTGCCAGATCATGTCCACGTCGGTTTTG…	MSGRCCAFPASLHGQFSVSSATDGEPLWVFLIMWGMDLRGFYRIAACLVLLLCGGCGQERKLESFGGPTMGSHYSVVYVRGAGQPDPVVMRPEVEAILADVDQQMSLWRSDSDIERFNALPANSCQIMSTSVLHLIRVGEQLSRESDGAFDLTVKPLMDLWGLGAHALFEQMPLVRQLARTRTLVGYRNLRIVGQQLCKNAAVQVDLNSIAAGYAVDRITERMDALGVHDYMVQATGELKVSGLKPDGSPWRVNLDAPSDDGYDAPKLFPLTGHAMSTSGDYRRYRGGNGRHISDTLDALTGSPVNHGLASVTVLHPSALMADGLSSLLLILGPERGWNYAQEHKIPAFFVIRADKRFIIRSNASFDRLAVRSSQ	15	+	204736	204769	TGGGAACCCTGCGCAGGTCATTGACCACTCAGTG
Pseudomonas syringae	1	Pap1089_5	Pap1089_5|ALQ49_05018	Cluster_43697.1	Type III Effector	Pap1089_5_Contig_20	+	54592	55125	534	177	GTGAAAAAGTCTGGCGCTGGAACTCAAGCCTATGCGTTGTTCGCCTCTGCGACGGGAAGCTCGTCGAAGGGCGTTCTAAGTACCATTGCCAGGCACCTGACGGGATGTTTTGCACCCAACAAGACTGCGCTTCATTCAGCAACAGCCGTTTCGTATGAGCTATTGCCGGGCAATTATTCTGTCGCCGCCAGTGTGCATGGCTTGTCGGTTGATCACCGCCAGCCGGCGCTGACACGGCTGAGTAACGTGCTGTTCAATCAGGCACTGGCGCTGGACCTGGAGCGTTTTGACGAGGGCGCGCCAGCCGACGAAATGTTCAGGCCTTCACTGAAACGCGAAGGTGCCCATCCCCGATTGGCCGACTCACTGGGTGGCGAGCATCTGGCTGTGCAATCCATG…	MKKSGAGTQAYALFASATGSSSKGVLSTIARHLTGCFAPNKTALHSATAVSYELLPGNYSVAASVHGLSVDHRQPALTRLSNVLFNQALALDLERFDEGAPADEMFRPSLKREGAHPRLADSLGGEHLAVQSMEKGLKRLAEDPAQSFARCHSFFYPISSDTTSPQASLHSVASSSG	517	+	54044	54075	CGGAACCGCGGCGCGTCCAGCGCCACTCAGTG
Pseudomonas syringae	1	Pap1089_5	Pap1089_5|ALQ49_05848	Cluster_406.2	Type III Effector	Pap1089_5_Contig_7	+	68432	71005	2574	857	CTGAGCCGATGGAGCCCGCTCATGACCTTAAGAATCAATACTCGTTCTGCTACCCCGGTTGTACCTCTGGAAACAGGCTCTACATCGCAGCCGACACCACCGCCGGTCACGGCAAGAGCGACTGAGCCTCCCCCCGTCGCCAATCCTGCGGCGCCTAAATCAGCGCCAGGTGTTCAGCAAGCACACGGGCTGAAGACGCGCATCGCTGGCAAGCTTTCCGAACGTCAGACCAATTTCAGTCTCGGGATTCCCGGCACTGGTCGTACTCTCAACCGGCCCTTGCGCAGCGGGATTCCGGAGGAAGGTGAGCAGGTATCGAACGAGGAGAGTCATGATCCGTTGCTCAAGGAAGCGCATGAACTGCAGCGCATGGTGGAGTCGGCGCTGACCCATCTGAAG…	MSRWSPLMTLRINTRSATPVVPLETGSTSQPTPPPVTARATEPPPVANPAAPKSAPGVQQAHGLKTRIAGKLSERQTNFSLGIPGTGRTLNRPLRSGIPEEGEQVSNEESHDPLLKEAHELQRMVESALTHLKAAPTSLWERPAPSTVRRITTKVFPWLKPAPLREVASNGSNAKTKIRINSQQSPETIAAAVKELSTRLDHQSKVLATATHALVAAREHLESLEQATPPSSTERLDHARARVQQADSTTRLASQQLRELIQGTEVLQLGALSEGQDQVEQKAEFSQQWLSELRTRMQAVDVRFADRHAAIEIELQLKVAQTRELISLDHDMTAAEHTAAQANTQLSALRAQRQETPEGSDEADRLDTAIGQTLATRSQAMQTHQQLAKRLVRVDADVA…	256	+	68145	68176	CGGAACCGAATCCATATTTCGACCACCCATCC
Pseudomonas syringae	1	Pap1089_5	Pap1089_5|ALQ49_100850	Cluster_7521.1	Type III Effector	Pap1089_5_Contig_36	+	775	1584	810	269	ATGACAAACGTCTCTGGACACATTGGAAAATACCCGAGCCTCGCTAACGTTCAGGCTGGGTCTTCGGCGTCGGTCGAAAACCAGATGCCTGATCCTGCTCAGCACAGCGATGGTCGGTGGAAACAGCTTCCGACTCAGCTATCGTCTATTGCATTGTCGAGATTTGATCAAGATATTTGCACGAATAATCACGGCATAAGCCAGCGTGCAATGTGCTTTGGCCTTTCGTTGAGCTGGATCAATATGATTCATGCAGGGAAAGACCATGCAACACCCTATGCGTCGGCAGAAAGAATGAGATTTTTGGGGTCATTCGAGGGTGTGGTGCACGCTCGTACTATTCATAACTTTTATCGAACTGAACATAAGTTTCTGTTGGAGCACTCGTCCTCAAATCCC…	MTNVSGHIGKYPSLANVQAGSSASVENQMPDPAQHSDGRWKQLPTQLSSIALSRFDQDICTNNHGISQRAMCFGLSLSWINMIHAGKDHATPYASAERMRFLGSFEGVVHARTIHNFYRTEHKFLLEHSSSNPGVSTGAMAGTESLLQAAEIKGLKLRPVLEDESNSGLPFLIACKQSGRQIVTDEAALNSLCEAIVENRKGVLVIYSEEIAHALGFSVSPDGKSATLFDPNLGEFHTHSKALADTIENISSADGLTLVGVQIFASKMR	29	+	715	746	GGGAACCGATTCGCTTCTAAAACCACTCAATC
Pseudomonas syringae	1	Pap1089_5	Pap1089_5|ALQ49_200010	Cluster_2093.1	Type III Effector	Pap1089_5_Contig_18	-	3092	4435	1344	447	ATGCATCGTCCTATCACCGCAGCCTATACCACCTCACGTCTCATCCTAGATCAGTCAAAACAGATATCACGCACCCCATCGGAAAGTAGCGTGCAATCAGCACTTCCTCAGCAAACAAGTATGAGCAGCCCAGTTCTGGAGCGGTCGAAAAGTGCGCCAACTTTATTGACTGCGGCACAGCGCACGATGCTTGCACAAGTGGGCGCATGCAACGCTCATCTGACCTCAGACGAAAACATGGCCATCAATGAACTGAGATTACACAAGCCCCGGTTACCTAAGGATACGTGGTTTTTCACTGATCCTAACAAGGACCCGGATGATGTCGTGACCTACACCTTGGGCAAGCAATTGCAGGCTGAGGGCTTTGTGCACATCACAGACGTAGTGGCAACACTG…	MHRPITAAYTTSRLILDQSKQISRTPSESSVQSALPQQTSMSSPVLERSKSAPTLLTAAQRTMLAQVGACNAHLTSDENMAINELRLHKPRLPKDTWFFTDPNKDPDDVVTYTLGKQLQAEGFVHITDVVATLGDAEVRSQRAEMAKGVFNKLELHDVHVSRGRDYAMNSLQSKEHAKFLLEGHALRAGPGEIHRDSLQDMSRRLARAPHGVGIVVIAGMSDINALITTCPDIVRERVDDITIMGGVEPLKDADGFVQPDARAYNNATDMDAARSLYRKAQELGIPLRIVTKEAAYKTAVSPSFYEGIAGSGHPVGHYLRDVQKSALKGLWEGIQAGLLPGLDDSWFFRTFMPNAQIEAVQLDKNKENSFEDIWPKVTKLNLYDPLTLLASVPGAAKLL…	28	-	4463	4495	TGAAACCGAAACGGCGTTGCTTGCCACACAGCA
Pseudomonas syringae	1	Pap1089_5	Pap1089_5|ALQ49_200043	Cluster_9017.1	Type III Effector	Pap1089_5_Contig_86	+	1789	2448	660	219	GTGACCTATGGCATCCGTGGCGGAGCTGGCACATCGGCGTATTACCCCCAGCCCCAGCCCCAGCCTTTTGATGAGTTGAAACTTGACCAGGGACAAATTCAGGAAAAGACGGAAAAGCTTAAAGAGAAAGGATACTTCACTGTTCCCATATCGGAAACTACGAGGAACTATCTGCACGAACAAAGCAGCCTTAGCAATCCTGTATGGCGAGAAGATGCCGTCGGAAAGGTGGTTGATTTAAGGTCCAGTGACTATGAAAGATCAATAACAACCGTGGCAAAAAATATCGCCACCAAACTTACCGGAACCGAAAGAGAACTCCGACCCCAAGAGTTTCAGCTCCGGCGGGCCAAAAATCAGGGGGCAGATCAATGGCATCAAGATAAAGAGCCAAAGAAG…	MTYGIRGGAGTSAYYPQPQPQPFDELKLDQGQIQEKTEKLKEKGYFTVPISETTRNYLHEQSSLSNPVWREDAVGKVVDLRSSDYERSITTVAKNIATKLTGTERELRPQEFQLRRAKNQGADQWHQDKEPKKVICIATVEGRGTEFVKRRDSEGIFRTGTYGKMVPLNADAIKRRTKEAKLDRFYFFAGKGISEDDVPKLVHRSPHESDRSIFLARWK	93	+	1664	1696	TGGAACCTTTTTCGTACTTAGCGCCACATAATG
Pseudomonas syringae	1	Pap1089_5	Pap1089_5|ALQ49_200060	Cluster2_1312.1	Type III Effector	Pap1089_5_Contig_18	+	861	2993	2133	710	ATGAATCCTCTACGATCTATTCAACACAACATTACAACTCCCCCAATCAGTGGCGGTCAGCCATTAGACGCGGTGGGCCCTCAGGCCCAGCAATCCCATCCTAAAAGGATTTCACCTTCTCAATTGAGCCAAAGCGCTCACCAGGCTCTAGAACGCCTTTCAGCTAATGCCGAACACCAACGCCTTGCATCACTGGTACGCAACGCTCTGCAGGATGGCACATTTCAATTTCAATCCAGTAACCACACGCAAGTAACCTATAAAGCGTCAATCTGTCTGCCAGCTGACACCGATACCGTGAGAACCGACCACTTGATTAATAACGAACTGACGGTTAAGGCCCGATTAAATGATCAATCGGAGTACGACATCGTCAGCGCACATTTGCATGGCTCTTCG…	MNPLRSIQHNITTPPISGGQPLDAVGPQAQQSHPKRISPSQLSQSAHQALERLSANAEHQRLASLVRNALQDGTFQFQSSNHTQVTYKASICLPADTDTVRTDHLINNELTVKARLNDQSEYDIVSAHLHGSSKAISFDVPSPPPAHGSASSVLSERTHLGMSRVLSQDAVDSSSLETPLLSSPGHSRPPSQPKPVHIGSVRRDSGSLVSDNPVVQALLSFAQADQAFPPQAASIAGVQLEMRPRRDIEKALEEFKGAFTVEKAQLMSGANSSERVDEDVNADIHIPLLLKAIERGAAAFGPGALIEMADGGQISAKAFLASCAPKITSNDDVLSAFINQKLKGDDDLQVRLGAQELLHVATKKEFQLGGLAGSIVVSSILGSAWELGASELLKNAIFG…	37	+	793	824	TGGAACCCAAGAGCCCTTGCGACCACACATTG
Pseudomonas syringae	1	PapICMP1657	PapICMP1657|ALQ58_00285	Cluster_2089.2	Type III Effector	PapICMP1657_Contig_110	-	39961	41112	1152	383	GTGTTGAACAAGATCAACCCTGCCATACAAGCCGCTGCACCTCAGGCGGTTGAGGGACCTGAAAGCCCCGCACCCATGCGACTGGATGCTGCGCAAGGTCAGCGGCCTCTTCCGCCGATGGACGCGCCATCTTCGCTGCGCTTGCGAGCATCAGCCGCGCCCGCAAGCGAGCAAAATCGCGCGAGTACCTCAACATCCGACAGCGCGGCAATAGATGAAGCTGATCCCGCGCCTGATCGACGAGAATCGAATATCAACCCCATCAAGCTTGCTGTTCAGATGATGGTGGGCTTTCTTTCCTTGAGCTCCGCGTATCGGATGGCGAGATTTCCAGGAGACTTTGCGAAAGATCCGGGAGGCAGTCTGTGGGCCGCGATCAATCTCCAGCATCGTTCCTCG…	MLNKINPAIQAAAPQAVEGPESPAPMRLDAAQGQRPLPPMDAPSSLRLRASAAPASEQNRASTSTSDSAAIDEADPAPDRRESNINPIKLAVQMMVGFLSLSSAYRMARFPGDFAKDPGGSLWAAINLQHRSSPADLVKGNQTVLERFGAHIPKDSKCFKAKADVTHDIPSGVAGQWNFKTRRVKLNPNIAFESHPANIAGHEFIHCYTHPEFRGRHIDHRHWKALNEGLTTHLTEKLPTPKRLLPIPLAKDPYHGFKLATGDSWPAAAKRIEGAVGEDTLLKAFFGGDDDAISEVAKAAAQIYPRLASSRTEQELYRAGMMRGSQQLAECYAGALLARRPAFARALVTQYASGVQFLGHAARAGQKSAIASGAEPRANGHHI	433	-	41545	41578	TGGGAACCACAGCGTGCGTTCCAGCCACTCACCG
Pseudomonas syringae	1	PapICMP1657	PapICMP1657|ALQ58_01108	Cluster_452.1	Type III Effector	PapICMP1657_Contig_18	+	39723	45596	5874	1957	ATGGTCAAGGTTACCTCTTCCGGATTTACTGCCAACCCTCTCTCTCATCATGCGGACAGTGTTTCCCCCGCGAACAGTCCCCCTCAGTTACCGGAGCCTGTGCCTCTGGTTGATCTAAGCGAGTCGTCCCGCAAGGGCGGCATGCGAAATCGGCCGCATGCCAGTTTGAACAGTCAGGTGCTCGGACTGCAAGCGGTGCCGTCGCAACGTGGAAAACATGTTCGTGTCAGAAGTCATGCCGATGGCGAGAGTGTCATTAATGCCTGGCTGGCAAAGCGCCCCTCGGTTCAAAGCGAAACCAGTCTTGATAACGATGGCAAACTGGTGCGTTACACCCCCGTGAATCATGAGCCGCTGGCGCCGCGCAATGAGGCGTTTTTCACCTCTGTGCCGGGGATG…	MVKVTSSGFTANPLSHHADSVSPANSPPQLPEPVPLVDLSESSRKGGMRNRPHASLNSQVLGLQAVPSQRGKHVRVRSHADGESVINAWLAKRPSVQSETSLDNDGKLVRYTPVNHEPLAPRNEAFFTSVPGMLMAVLTVHPEMEHGISGDITADAVAARLAEPPIGLLTGIWQSSHDRAYLERGGVVHTANMEERWAPLTLPGINPREPLRMAGLQADGGVYLHNGSQLWRLTETAAESVTTEKLPEGAAVRIGAGGEVHGLHEGALHSNGISRPIELWRPKAGAPGREQSPARPVDLLPLPGGTAALILDDKGRIYHADLKGTGAVEAHRLKLPADFAQGKGWAVTAMGLSRDDTVHLMLQDQNGRRMSLQRAPGEALFRPAYLLDRPLLLLYTEGL…	173	+	39519	39550	CGGAACCGATCCGGTTGCCTGGCCACTCAATT
Pseudomonas syringae	1	PapICMP1657	PapICMP1657|ALQ58_01352	Cluster_4528.1	Type III secretion related protein	PapICMP1657_Contig_21	-	12806	14050	1245	414	ATGAGCATCGGCATTACACCCCGGCCGCAACAGACCACCACGCCACTCGATTTTTCGGCGCTAAGCGGCAAGAGTCCTCAACCAAACACGTTCGGCGAGCAGAACACTCAGCAAGCGATCGACCCGAGTGCACTGTTGTTCGGCAGCGACACACAGAAAGACGTCAACTTCGGCACGCCCGACAGCACCGTCCAGAATCCGCAGGACGCCAGCAAGCCCAACGACAGCCAGTCCAACATCGCTAAATTGATCAGTGCATTGATCATGTCGTTGCTGCAGATGCTCACCAACTCCAATAAAAAGCAGGATGCCAATCAGGAGCAGCCTGATAGCCAGGCTCCTTTCCAGAACAACGGCGGGCTCGGTACACCGTCGGCCGATAGCGGGGGCGGCGGTACA…	MSIGITPRPQQTTTPLDFSALSGKSPQPNTFGEQNTQQAIDPSALLFGSDTQKDVNFGTPDSTVQNPQDASKPNDSQSNIAKLISALIMSLLQMLTNSNKKQDANQEQPDSQAPFQNNGGLGTPSADSGGGGTPDATGGGGGGDTPSATGGGGSGSGGTPTATGGGSGGTPTATGGGEGGVTPQITPQLANPNRTSGTGSVSDTAGSTEQAGKINVVKDTIKVGAGEVFDGHGATFTADKSMGNGDQGENQKPMFELAEGATLKNVNLGENEVDGIHVKAKNAQEVTIDNVHAQNVGEDLITVKGEGGAAVTNLNIKNSSAKGADDKVVQLNANTHLKVDNFKADDFGTMVRTNGGKQFDDMSIELNGIEANHGKFALVKSDSDDLKLATGNIAMTDVK…	122	-	14172	14202	GGGAACCGGTCGCTGCGCTTTGCCACTCACT
Pseudomonas syringae	1	PapICMP1657	PapICMP1657|ALQ58_01353	Cluster_3390.2	Type III secretion related protein	PapICMP1657_Contig_21	+	14356	14850	495	164	ATGACCAACAATGACCAGTACCACACCCTTATCAACGAAATCTGCGCACTCAGCCTGATTTCCACACCTGAACGTTTCTATGAATCTGCCAATTTCAAAATCAGCGAAGTGGACTTCACCCTGCAGTTTCAGGACCGCGACGAAGGCCGTGCCGTTCTGATCTACGGTGACATGGGCGCGTTGCCCGCGCGCGGCCGTGAGAGCGCGTTGCTGGCGTTGATGGACATCAACTTTCATATGTTCGCGGGTGCCCACAGCCCGGCATTTTCCTTTAATGCGCAGACCGGTCGTGTGCTGCTGATGGGCTCTGTGGCCCTTGAACGAGCCTCTGCCGAAGGCGTGCTGTTGTTGATGAAGTCGTTTTCCGACCTGGCCAAAGAGTGGCGCGAGCATGGGTTC…	MTNNDQYHTLINEICALSLISTPERFYESANFKISEVDFTLQFQDRDEGRAVLIYGDMGALPARGRESALLALMDINFHMFAGAHSPAFSFNAQTGRVLLMGSVALERASAEGVLLLMKSFSDLAKEWREHGFMGQATTVGASTDQPVAPAAKRESLSAPGRFQ	57	+	14267	14299	AGGAACTGAAATGCCTATGCCTGCGACTCAGTG
Pseudomonas syringae	1	PapICMP1657	PapICMP1657|ALQ58_01359	Cluster_4702.2	Type III secretion related protein	PapICMP1657_Contig_21	+	28068	29186	1119	372	ATGCAAGCACTTAACAGCATCAGTTCGTTGCAAACCTCTGCATCATTGTTCCCCGTGTCGCTCAACAGCGATGTGAGCGCCAACACCAGCACTTCCAGCAAAGAGCTCAAGGCTGTGATCGATCAGCTGGTTCAGGCGCTGACCCAAAGTGGGCAGCTCGATGAAACCTCACCGCTCGGCAAAATGCTCGCCAAGGCCATGGCTGCGGATGGCAAGTCGGCTAACAGCATCGATGACATCACTGCATCGCTCGACAAGCTGATCCACGAAAAGCTCGGCGACAATTTCGGTGCCTCTGCCGGCATCGGCGCGGGTGGCGGTGGCGTTGGCGGTGGCATTGGCGGGGCGGGTTCTGGTTCGGGTGTCGGTGGCGGTCTGAGCAGCGACGCGGGTGCCGGG…	MQALNSISSLQTSASLFPVSLNSDVSANTSTSSKELKAVIDQLVQALTQSGQLDETSPLGKMLAKAMAADGKSANSIDDITASLDKLIHEKLGDNFGASAGIGAGGGGVGGGIGGAGSGSGVGGGLSSDAGAGQSDLMSQVLNGLGKAVLDDLLTPSGEGGTTFSSDDMPTLEKVAQFMDDNKAQFPTRDGGSWMNELKEDNGLDAQETAQFRSALDVIGQQLGQQQGDASGVTSGGGLGSPVSDTSLGNPAIDANTGPAANGNASVDVGQLIGQLIDRGLQSVSSGGGLGTPVDNSTQPAGGTPAANPTGNVSNQDLGQLLSGLLQRGLEATLQDAGNTGADLQSSAAQVAAQLINALLQGTNNQTNQAVA	442	+	27594	27626	TGGAACCGATTCGCAGGCTGCTGCCACCTAGTG
Pseudomonas syringae	1	PapICMP1657	PapICMP1657|ALQ58_01360	Cluster_28714.2	Type III secretion related protein	PapICMP1657_Contig_21	+	29214	29588	375	124	GTGACCATTTCCCAACTCAGCAATTTGAAAAGTGTATCGCCGGAGCTTGGGCAGAATGCTCATCAGGGGCTCGGCTCCGAACCCGTTCAGGCGGATGTCGACCTATTCAATGCGGCGATGCGCCCTGACAGCGGGCCCGCAGCGTCGCACCTGTCCGACCGGATAGCCAGTGCGCTGTCCGAGCGGCTGGGCAGTACCGAGAAGCTTTCACAGCAAGCATTACGCCAGATGAAGAAAGTGTCGAACACCGAAGATCCTGGAGACATCGTGCAGATGAGTCGGGCGTTGTCGCAGTGCTCGTTGCAAATGGCGTTGACGACCAAGGTCGTGAGCAAGAGCGCTCAGGCGCTCGACAAGTTGACCAACCTGCAGTAG	MTISQLSNLKSVSPELGQNAHQGLGSEPVQADVDLFNAAMRPDSGPAASHLSDRIASALSERLGSTEKLSQQALRQMKKVSNTEDPGDIVQMSRALSQCSLQMALTTKVVSKSAQALDKLTNLQ	1588	+	27594	27626	TGGAACCGATTCGCAGGCTGCTGCCACCTAGTG
Pseudomonas syringae	1	PapICMP1657	PapICMP1657|ALQ58_01362	Cluster_2413.3	Type III secretion related protein	PapICMP1657_Contig_21	+	30400	30930	531	176	ATGATGAGCCTTTCTGCCGAGGATCACTGGATTCACTGGTGGTGCAACCCCTGGCAGTGGGCTCATTCGCAGTGGCATGACCGATTCGCCAACGCTCGTGGGTTATCGGTCAGTGACTGCGATGCGCTCATGGCCAGCCGTCATGGCGTGTTTCTGCAGAGTCTGGGCATTGACCCGGCTCAGCCGCCAGCGCCCGCGGAACCGGTGCTGCGCTGGTTGGCGCTGACGCCCTCGCAGCGTGAGCAGGCGCTAAGCCTGGCGCAGTGCATCTGCTTCTCCCGTAACGAAAGCGACGGCCCTGACGGTCAATGGTGCTGGGGATTGACCAAAGCGCTGCGCCCCGGTGTCTGGCTGGAGTTTGAACACGAGGACGCGCGTCTTCTGCTGGGCGCCTGGCTT…	MMSLSAEDHWIHWWCNPWQWAHSQWHDRFANARGLSVSDCDALMASRHGVFLQSLGIDPAQPPAPAEPVLRWLALTPSQREQALSLAQCICFSRNESDGPDGQWCWGLTKALRPGVWLEFEHEDARLLLGAWLGPQYWSRLRLEWPPNEVPDTPGKAPENKLQALWQAIMWRVTAA	2774	+	27594	27626	TGGAACCGATTCGCAGGCTGCTGCCACCTAGTG
Pseudomonas syringae	1	PapICMP1657	PapICMP1657|ALQ58_01364	Cluster_49085.1	Type III secretion related protein	PapICMP1657_Contig_21	+	31642	31866	225	74	ATGATCAGTTTCAACAGCTTGCAACGCCATCTCGACAACTCGGTGAGCCGTGCTCACACCAACATGGACCAGGCAGCGATGGAAGCCTCCGAGAGTGGTACCGTCGAAGACCTGCAGGCATTCAACGATGCCCAGCAGCAGGTCGATGTCGCCGGTATTGCCGTCAATGAATGCCTGCGTGCCAAGCACGGTATCAATAAAGCAGTCATCGATGGAATTCAGTGA	MISFNSLQRHLDNSVSRAHTNMDQAAMEASESGTVEDLQAFNDAQQQVDVAGIAVNECLRAKHGINKAVIDGIQ	30	+	31580	31612	TGGAACCGCTCGGCGGGTTTGCTCCACTCAAGG
Pseudomonas syringae	1	PapICMP1657	PapICMP1657|ALQ58_01766	Cluster_2156.1	NA	PapICMP1657_Contig_32	+	24148	24351	204	67	GTGCCCGGCAAGACCGGCAAGACAGGGGTCAATAAGGAGGCTGCAACCATGACGCTACCCAATCCAATCGAAGTGCCCGATCCGAACATTGATGAACCTGCCCTGCCCGAGCCGATACCCGAGCAGGATCCGCCATCGACGCCGCCGCCCAATGAAACGCCGGTAGGTGACCCGCCCGCCAATGCGCCGCCTGTCACGGTGTGA	MPGKTGKTGVNKEAATMTLPNPIEVPDPNIDEPALPEPIPEQDPPSTPPPNETPVGDPPANAPPVTV	2359	+	21762	21789	TTGAACGGGTCCAGGTTGATGGCCACCA
Pseudomonas syringae	1	PapICMP1657	PapICMP1657|ALQ58_03312	Cluster_4852.1	Type III secretion related protein	PapICMP1657_Contig_7	-	3014	4120	1107	368	ATGAAAATCGTCGCTCCGCCTATCATGCGAATACTTCCGGTCGCGCCGACCCGCGTCGTGACGCCTGCTGCGCAGCCACTTCCCAATGCTGATCTGCACAATTCAGGGACTTCGCCACAACAGGTTTCGCGCTTCGCGGCCGCGCTCATCCAGCACAGACGCATCCTCATTCAGCGCGACCTGATCGCCAGCAACAATGCCTTGCAGTCGCGAGCGGTGAAGCTCGGTGAGCTTTATCAACTGCTGATGACCGATCAGGACACCGGGCTGGATAACGCGGCCAGGGTATTGCGCAAAAAGCTCATGCAGGATGACTCGTCCTCAGATCTGAAACAGGTTCTGGATTACACCGACGGTGATGCCGCCAAGGCTCATGTGGTGTTGCAAGCCGCCAGGAAG…	MKIVAPPIMRILPVAPTRVVTPAAQPLPNADLHNSGTSPQQVSRFAAALIQHRRILIQRDLIASNNALQSRAVKLGELYQLLMTDQDTGLDNAARVLRKKLMQDDSSSDLKQVLDYTDGDAAKAHVVLQAARKQAEADGEMGEHVVLTQQLKQLRRKYGPRARAGINSAKAFARPNIDNKRRVALRNLYSVAVSGQPNITGLIEALLGEQQEAGQFNIDLRDMRTAIADDLSAMTPSASHEQLRTLMHGLNTARHVTTLLKGCEHLLGRMRNKNPDLTVDPPAFLKHLLTLTANGMNVNQTLQLTQHIGGKQLKHQLAFLNGLRPMLLQLPILLWRDMKSRQTALSNLLILMAELTTQEQKQLYGGLV	27	-	4147	4179	GGGAACTGATCCGGGACCGTGACCCACTCAGCG
Pseudomonas syringae	1	PapICMP1657	PapICMP1657|ALQ58_03314	Cluster_477.1	Type III Effector	PapICMP1657_Contig_7	+	5005	7347	2343	780	ATGCGTATATCCAGTTCTCCCTTCGTTATCGTGAACCAACCCACCCCTGGCGAACTGGCTCTGGCTGTTGAGTCGCCTCTTGCCAAAGCCTTGCCGACACCTGCGGGTGGCGGTGGGCAAGCCGGCGTGCAGTTCGGTCAGCCGGCCGGCAACACGCAAGGCGCGCCGACAGGAGCCGAGCAGACCGCGTCGTCTATCCTGGCTCTTTTGCTCCAGGGCAGTGGCGGGGCAGCTGCCAATGCCAATGTGAATAATCAGGTCCAGCCGCAACCCTGCGCAGATTCTCCTGCCGAGGCTGCACCGACTGAAGCGACTGCCCCGGCCGCTCCGGTTGAACAGGTCGCAGCTCCCACGAACACAGATGCAACCGACGCTTCCAACGCCCCCAAAGCCGCAGAC…	MRISSSPFVIVNQPTPGELALAVESPLAKALPTPAGGGGQAGVQFGQPAGNTQGAPTGAEQTASSILALLLQGSGGAAANANVNNQVQPQPCADSPAEAAPTEATAPAAPVEQVAAPTNTDATDASNAPKAADAAFLDNSEYSSPEALKRWEPMVAHLPPEEREQAAKELNRPIAAAWMARDDGPDAGKAMDFINANPALKTAVDVAQGGGNADGKITNKDLKTFAKNMEKAADSADKDLANYTKDNPDADPQSLEMVRSAAVMRANMPLAIAADPHHAVDAADKTKVDGNVDAEDLKGLAQSNPGLSGALKQSCSTWSQPGFLGQVDEAGMSGRKKAAHSPDKMFDAKNLSEWIKKSAPTNGGQFASMLSDSATLNAVAGIDISKLDKDVFDKPKSYS…	32	+	4942	4973	TGGAACCAACTTGCACCTTCAACCACACAGTT
Pseudomonas syringae	1	PapICMP1657	PapICMP1657|ALQ58_03597	Cluster_9017.1	Type III Effector	PapICMP1657_Contig_73	+	155383	156060	678	225	ATGATCAATAGCATCCGTGGCGGAGCGGGCACATCGGCCTATCACACCCAGCCCCAGCCATTTGATGAGTTGAAACTGAACCCTGAAGTCATTGAGAAAAAGACGGAAAGACTCAAGGATAAGGGATATTTCAGCGTTCGTATGTCGGAGCCTACGAAAAGCTATTTGCATCAGCGAAGCACGCTCAGCAATCCCGCATGGCGAAACCAGACCGTAGGACAAGTCATAGACTTGAAGGGAACGGACTATGAGCGCTCGGTCACGGCAGTGGCAAAAGACATTGCAACGAGACTTACCGGGAAACAGGAACAACTGAAACCACAAGAATTTCAGCTGCGGCGGGCCAAAAATCAGGGGGCGGATAAATGGCACCAGGATAAGGAGCCGAAAAAGGTCATC…	MINSIRGGAGTSAYHTQPQPFDELKLNPEVIEKKTERLKDKGYFSVRMSEPTKSYLHQRSTLSNPAWRNQTVGQVIDLKGTDYERSVTAVAKDIATRLTGKQEQLKPQEFQLRRAKNQGADKWHQDKEPKKVICIATVEGRGTEFIKPSESKKLFETGEYAEMIPKNAEADAQKTAEAIAQKTNEAKKDRFYFFAGKGITEESIPKLVHRSPHESGRAIFMARWK	91	+	155260	155292	CGGAACCGCTCTTCAACTGGTTGCCACCAAGGC
Pseudomonas syringae	1	PapICMP1657	PapICMP1657|ALQ58_03944	Cluster_4422.1	Type III secretion related protein	PapICMP1657_Contig_85	+	47309	48283	975	324	ATGACCATGGGTGTTTCACCTATTCGTAACTCAAACTCCCTACCGATCGATTTTTCGTCGTTGAGCGCAAAGAGTGGCGGGCATAACGGGCTGGGCAGCGGAGACAATTCGACTATCGACCCGAGTACGTTGTTGTTCGGCAATCAAGGGCAGACGCAGGTCAATTTCGCTCCGCCCAACAGCACGGACTCCTCAACCAGCGGTGTGAACGCTGCGTCAGGCAATACGGCGTCCGGCCTGGTCGAGCAAATCATGAGCCTGCTGAAACAATTGATGCAGATGCTGATGCAAAACAACAATGCTTCCGGTAACCCTCAGACTGATTCGTCAACGCCAGGCGTCGGCAGTGGCAACAGCGTCGGGAGCGGCGGTACTGGAAGCAGTCTCGCAGGCAGTGAC…	MTMGVSPIRNSNSLPIDFSSLSAKSGGHNGLGSGDNSTIDPSTLLFGNQGQTQVNFAPPNSTDSSTSGVNAASGNTASGLVEQIMSLLKQLMQMLMQNNNASGNPQTDSSTPGVGSGNSVGSGGTGSSLAGSDGGDETSGVGNGGLGDAGSTPTTSAADGVPSDTSLTGSGGLHLPQQLEQYRGDIMDAAKATGLTPSVIAGQIWAESRGQLNAATTNVNGKADAGLMQVNADTFKSLQQQNPGLLGNDVNDSHTNIMAGALYLRDQNKEFGDMGAALRAYNSGPDKVNKADLSDTGGVGGSSYPADVLNFAKIIESGQGNLPA	89	+	47189	47220	GGGAACCGAGTCACTCAGTGAACCACTCAGTT
Pseudomonas syringae	1	PapICMP1657	PapICMP1657|ALQ58_05033	Cluster_406.2	Type III Effector	PapICMP1657_Contig_61	+	68432	71005	2574	857	CTGAGCCGATGGAGCCCGCTCATGACCTTAAGAATCAATACTCGTTCTGCTACCCCGGTTGTACCTCTGGAAACAGGCTCTACATCGCAGCCGACACCACCGCCGGTCACGGCAAGAGCGACTGAGCCTCCCCCCGTCGCCAATCCTGCGGCGCCTAAATCAGCGCCAGGTGTTCAGCAAGCACACGGGCTGAAGACGCGCATCGCTGGCAAGCTTTCCGAACGTCAGACCAATTTCAGTCTCGGGATTCCCGGCACTGGTCGTACTCTCAACCGGCCCTTGCGCAGCGGGATTCCGGAGGAAGGTGAGCAGGTATCGAACGAGGAGAGTCATGATCCGTTGCTCAAGGAAGCGCATGAACTGCAGCGCATGGTGGAGTCGGCGCTGACCCATCTGAAG…	MSRWSPLMTLRINTRSATPVVPLETGSTSQPTPPPVTARATEPPPVANPAAPKSAPGVQQAHGLKTRIAGKLSERQTNFSLGIPGTGRTLNRPLRSGIPEEGEQVSNEESHDPLLKEAHELQRMVESALTHLKAAPTSLWERPAPSTVRRITTKVFPWLKPAPLREVASNGSNAKTKIRINSQQSPETIAAAVKELSTRLDHQSKVLATATHALVAAREHLESLEQATPPSSTERLDHARARVQQADSTTRLASQQLRELIQGTEVLQLGALSEGQDQVEQKAEFSQQWLSELRTRMQAVDVRFADRHAAIEIELQLKVAQTRELISLDHDMTAAEHTAAQANTQLSALRAQRQETPEGSDEADRLDTAIGQTLATRSQAMQTHQQLAKRLVRVDADVA…	256	+	68145	68176	CGGAACCGAATCCATATTTCGACCACCCATCC
Pseudomonas syringae	1	PapICMP1657	PapICMP1657|ALQ58_100400	Cluster_2089.1	Type III secretion related protein	PapICMP1657_Contig_110	-	41124	41522	399	132	CTGGCAATGAACTCATCCTCCACTCTACAAAAGCTGCTTGATAGGCGTGGTCAGGCGGCCAACGGAAATTCTGCGACACAGGCCATACAGTGGCAGGAAGGAATGAACCTCACGCTGCATGTGAACGGCGATAGCCTCACGATGTTGGCCGAGATCATCGATCTGCGTGCCGACCCTCAGGACGACATCCTCTTGCGCAAGCTGCTTGCCCATGCTTTTCCGGGCATGCGGCTACGACGCGGCGCGTTGACCATCAACCCGGACGAGAACACGTTGGTGTACTCCTACGAGCATGACTTTCTCGCGCTGGACAAGGCCCGATTCGAAAATCTGCTGGCTAATTTTGCCGAAACAACGCAGGAGTTGCGTAATACCGCGCAGCGCCTGCGTTACCGCTGA	MAMNSSSTLQKLLDRRGQAANGNSATQAIQWQEGMNLTLHVNGDSLTMLAEIIDLRADPQDDILLRKLLAHAFPGMRLRRGALTINPDENTLVYSYEHDFLALDKARFENLLANFAETTQELRNTAQRLRYR	23	-	41545	41578	TGGGAACCACAGCGTGCGTTCCAGCCACTCACCG
Pseudomonas syringae	1	PapICMP1657	PapICMP1657|ALQ58_101026	Cluster_7521.1	Type III Effector	PapICMP1657_Contig_45	-	63348	64157	810	269	ATGACAAACGTCTCTGGACACATTGGAAAATACCCGAGCCTCGCTAACGTTCAGGCTGGGTCTTCGGCGTCGGTCGAAAACCAGATGCCTGATCCTGCTCAGCACAGCGATGGTCGGTGGAAACAGCTTCCGACTCAGCTATCGTCTATTGCATTGTCGAGATTTGATCAAGATATTTGCACGAATAATCACGGCATAAGCCAGCGTGCAATGTGCTTTGGCCTTTCGTTGAGCTGGATCAATATGATTCATGCAGGGAAAGACCATGCAACACCCTATGCGTCGGCAGAAAGAATGAGATTTTTGGGGTCATTCGAGGGTGTGGTGCACGCTCGTACTATTCATAACTTTTATCGAACTGAACATAAGTTTCTGTTGGAGCACTCGTCCTCAAATCCC…	MTNVSGHIGKYPSLANVQAGSSASVENQMPDPAQHSDGRWKQLPTQLSSIALSRFDQDICTNNHGISQRAMCFGLSLSWINMIHAGKDHATPYASAERMRFLGSFEGVVHARTIHNFYRTEHKFLLEHSSSNPGVSTGAMAGTESLLQAAEIKGLKLRPVLEDESNSGLPFLIACKQSGRQIVTDEAALNSLCEAIVENRKGVLVIYSEEIAHALGFSVSPDGKSATLFDPNLGEFHTHSKALADTIENISSADGLTLVGVQIFASKMR	29	-	64186	64217	GGGAACCGATTCGCTTCTAAAACCACTCAATC
Pseudomonas syringae	1	PapICMP1657	PapICMP1657|ALQ58_200296	Cluster_8010.1	Type III Effector	PapICMP1657_Contig_151	+	3629	4483	855	284	ATGGGGCTATGTATTTCAAAAAATTCTGGTAGCAGCTACAGCTACAGTGATAGCGACCGCTGGGAAGCGCCTGCATGTCCTCCAAACGCCAGGTCTGTTTCCAGTCATCAAACAGCATCTGCGAGTGACATCGCATCAGGCGATGTGGATGAACGTCCTGCAACGTTTTCTCATTTTCAACTTGCGCGGTGCGGTGGAGAGTACACGCTTAGCATGGTTTCTGCAGCGGCTTATCAAGCAGAAAGACGGCATCGCGGTAATTTAATAAAAGATCGTAGTCAATCCATACTCCCATGGGTCCAGGTATATCATTCTAAAAAAGGTTTGGATTACAGCTTCAAGATCGACAGAACTACGACTGTTAAAGTGGCTGGGTTCAACTGCTCTATCCCCAATAAC…	MGLCISKNSGSSYSYSDSDRWEAPACPPNARSVSSHQTASASDIASGDVDERPATFSHFQLARCGGEYTLSMVSAAAYQAERRHRGNLIKDRSQSILPWVQVYHSKKGLDYSFKIDRTTTVKVAGFNCSIPNNRGTRHLYSAGTSQTNMPVIADNMSACIAVACAAENVDAGTGERRPGAKVRVFHLLPFRREDLVPEEVLASVRDYLRTTKEQGLTLRVAMHGGNTEGDFSVSTAQALKSLFADEGIPLEFDETCANRMSETLLGAVILDDNSTHFIKHLVAQ	257	+	3341	3372	TGGAACCAATGAAGAGCTTAAGCCACTCAGTA
Pseudomonas syringae	1	PapICMP1659	PapICMP1659|ALQ59_00191	Cluster_4852.1	Type III secretion related protein	PapICMP1659_Contig_108	+	40311	41417	1107	368	ATGAAAATCGTCGCTCCGCCTATCATGCGAATACTTCCGGTCGCGCCGACCCGCGTCGTGACGCCTGCTGCGCAGCCACTTCCCAATGCTGATCTGCACAATTCAGGGACTTCGCCACAACAGGTTTCGCGCTTCGCGGCCGCGCTCATCCAGCACAGACGCATCCTCATTCAGCGCGACCTGATCGCCAGCAACAATGCCTTGCAGTCGCGAGCGGTGAAGCTCGGTGAGCTTTATCAACTGCTGATGACCGATCAGGACACCGGGCTGGATAACGCGGCCAGGGTATTGCGCAAAAAGCTCATGCAGGATGACTCGTCCTCAGATCTGAAACAGGTTCTGGATTACACCGACGGTGATGCCGCCAAGGCTCATGTGGTGTTGCAAGCCGCCAGGAAG…	MKIVAPPIMRILPVAPTRVVTPAAQPLPNADLHNSGTSPQQVSRFAAALIQHRRILIQRDLIASNNALQSRAVKLGELYQLLMTDQDTGLDNAARVLRKKLMQDDSSSDLKQVLDYTDGDAAKAHVVLQAARKQAEADGEMGEHVVLTQQLKQLRRKYGPRARAGINSAKAFARPNIDNKRRVALRNLYSVAVSGQPNITGLIEALLGEQQEAGQFNIDLRDMRTAIADDLSAMTPSASHEQLRTLMHGLNTARHVTTLLKGCEHLLGRMRNKNPDLTVDPPAFLKHLLTLTANGMNVNQTLQLTQHIGGKQLKHQLAFLNGLRPMLLQLPILLWRDMKSRQTALSNLLILMAELTTQEQKQLYGGLV	27	+	40252	40284	GGGAACTGATCCGGGACCGTGACCCACTCAGCG
Pseudomonas syringae	1	PapICMP1659	PapICMP1659|ALQ59_00597	Cluster_2413.3	Type III secretion related protein	PapICMP1659_Contig_134	-	10866	11396	531	176	ATGATGAGCCTTTCTGCCGAGGATCACTGGATTCACTGGTGGTGCAACCCCTGGCAGTGGGCTCATTCGCAGTGGCATGACCGATTCGCCAACGCTCGTGGGTTATCGGTCAGTGACTGCGATGCGCTCATGGCCAGCCGTCATGGCGTGTTTCTGCAGAGTCTGGGCATTGACCCGGCTCAGCCGCCAGCGCCCGCGGAACCGGTGCTGCGCTGGTTGGCGCTGACGCCCTCGCAGCGTGAGCAGGCGCTAAGCCTGGCGCAGTGCATCTGCTTCTCCCGTAACGAAAGCGACGGCCCTGACGGTCAATGGTGCTGGGGATTGACCAAAGCGCTGCGCCCCGGTGTCTGGCTGGAGTTTGAACACGAGGACGCGCGTCTTCTGCTGGGCGCCTGGCTT…	MMSLSAEDHWIHWWCNPWQWAHSQWHDRFANARGLSVSDCDALMASRHGVFLQSLGIDPAQPPAPAEPVLRWLALTPSQREQALSLAQCICFSRNESDGPDGQWCWGLTKALRPGVWLEFEHEDARLLLGAWLGPQYWSRLRLEWPPNEVPDTPGKAPENKLQALWQAIMWRVTAA	2774	-	14170	14202	TGGAACCGATTCGCAGGCTGCTGCCACCTAGTG
Pseudomonas syringae	1	PapICMP1659	PapICMP1659|ALQ59_00599	Cluster_28714.2	Type III secretion related protein	PapICMP1659_Contig_134	-	12208	12582	375	124	GTGACCATTTCCCAACTCAGCAATTTGAAAAGTGTATCGCCGGAGCTTGGGCAGAATGCTCATCAGGGGCTCGGCTCCGAACCCGTTCAGGCGGATGTCGACCTATTCAATGCGGCGATGCGCCCTGACAGCGGGCCCGCAGCGTCGCACCTGTCCGACCGGATAGCCAGTGCGCTGTCCGAGCGGCTGGGCAGTACCGAGAAGCTTTCACAGCAAGCATTACGCCAGATGAAGAAAGTGTCGAACACCGAAGATCCTGGAGACATCGTGCAGATGAGTCGGGCGTTGTCGCAGTGCTCGTTGCAAATGGCGTTGACGACCAAGGTCGTGAGCAAGAGCGCTCAGGCGCTCGACAAGTTGACCAACCTGCAGTAG	MTISQLSNLKSVSPELGQNAHQGLGSEPVQADVDLFNAAMRPDSGPAASHLSDRIASALSERLGSTEKLSQQALRQMKKVSNTEDPGDIVQMSRALSQCSLQMALTTKVVSKSAQALDKLTNLQ	1588	-	14170	14202	TGGAACCGATTCGCAGGCTGCTGCCACCTAGTG
Pseudomonas syringae	1	PapICMP1659	PapICMP1659|ALQ59_01182	Cluster_9017.1	Type III Effector	PapICMP1659_Contig_175	+	8154	8831	678	225	ATGATCAATAGCATCCGTGGCGGAGCGGGCACATCGGCCTATCACACCCAGCCCCAGCCATTTGATGAGTTGAAACTGAACCCTGAAGTCATTGAGAAAAAGACGGAAAGACTCAAGGATAAGGGATATTTCAGCGTTCGTATGTCGGAGCCTACGAAAAGCTATTTGCATCAGCGAAGCACGCTCAGCAATCCCGCATGGCGAAACCAGACCGTAGGACAAGTCATAGACTTGAAGGGAACGGACTATGAGCGCTCGGTCACGGCAGTGGCAAAAGACATTGCAACGAGACTTACCGGGAAACAGGAACAACTGAAACCACAAGAATTTCAGCTGCGGCGGGCCAAAAATCAGGGGGCGGATAAATGGCACCAGGATAAGGAGCCGAAAAAGGTCATC…	MINSIRGGAGTSAYHTQPQPFDELKLNPEVIEKKTERLKDKGYFSVRMSEPTKSYLHQRSTLSNPAWRNQTVGQVIDLKGTDYERSVTAVAKDIATRLTGKQEQLKPQEFQLRRAKNQGADKWHQDKEPKKVICIATVEGRGTEFIKPSESKKLFETGEYAEMIPKNAEADAQKTAEAIAQKTNEAKKDRFYFFAGKGITEESIPKLVHRSPHESGRAIFMARWK	91	+	8031	8063	CGGAACCGCTCTTCAACTGGTTGCCACCAAGGC
Pseudomonas syringae	1	PapICMP1659	PapICMP1659|ALQ59_01421	Cluster_452.1	Type III Effector	PapICMP1659_Contig_2	+	20368	26241	5874	1957	ATGGTCAAGGTTACCTCTTCCGGATTTACTGCCAACCCTCTCTCTCATCATGCGGACAGTGTTTCCCCCGCGAACAGTCCCCCTCAGTTACCGGAGCCTGTGCCTCTGGTTGATCTAAGCGAGTCGTCCCGCAAGGGCGGCATGCGAAATCGGCCGCATGCCAGTTTGAACAGTCAGGTGCTCGGACTGCAAGCGGTGCCGTCGCAACGTGGAAAACATGTTCGTGTCAGAAGTCATGCCGATGGCGAGAGTGTCATTAATGCCTGGCTGGCAAAGCGCCCCTCGGTTCAAAGCGAAACCAGTCTTGATAACGATGGCAAACTGGTGCGTTACACCCCCGTGAATCATGAGCCGCTGGCGCCGCGCAATGAGGCGTTTTTCACCTCTGTGCCGGGGATG…	MVKVTSSGFTANPLSHHADSVSPANSPPQLPEPVPLVDLSESSRKGGMRNRPHASLNSQVLGLQAVPSQRGKHVRVRSHADGESVINAWLAKRPSVQSETSLDNDGKLVRYTPVNHEPLAPRNEAFFTSVPGMLMAVLTVHPEMEHGISGDITADAVAARLAEPPIGLLTGIWQSSHDRAYLERGGVVHTANMEERWAPLTLPGINPREPLRMAGLQADGGVYLHNGSQLWRLTETAAESVTTEKLPEGAAVRIGAGGEVHGLHEGALHSNGISRPIELWRPKAGAPGREQSPARPVDLLPLPGGTAALILDDKGRIYHADLKGTGAVEAHRLKLPADFAQGKGWAVTAMGLSRDDTVHLMLQDQNGRRMSLQRAPGEALFRPAYLLDRPLLLLYTEGL…	173	+	20164	20195	CGGAACCGATCCGGTTGCCTGGCCACTCAATT
Pseudomonas syringae	1	PapICMP1659	PapICMP1659|ALQ59_02572	Cluster_5336.1	NA	PapICMP1659_Contig_4	-	1938	2267	330	109	ATGCAGCCCGCCACGTTTGCGCGGCTGCAGCAGCTCGCCATCGACCGGCAATCGTGGGCCACGCAAGGCAATAGTGCGCTGGCCGACTATTATTGGAGCGCGCTCAACGATTACGAAAAGGGGCGTTTCGAGGATCCGGCCAAGCGCATCAAGGCGGTCAAGCTGGAAACCGCCAACCAGGCCATGCGCCAATTACTCGCACAGCCAGGCTATATGCGCATCGAAAAACCGCTGTTCAGCTATGACGGACTGTACTGGCTGGCGGGTGGCGTGCTGGGCCTGATCGTGCTGCTGGCCGTGTGGCGCTGGCGGGCACGGGGCAAAACATAG	MQPATFARLQQLAIDRQSWATQGNSALADYYWSALNDYEKGRFEDPAKRIKAVKLETANQAMRQLLAQPGYMRIEKPLFSYDGLYWLAGGVLGLIVLLAVWRWRARGKT	770	-	1124	1168	GCGTCCGGTTCTTGTTATCGAAATCCGGGCTGACGGCCACTTCGG
Pseudomonas syringae	1	PapICMP1659	PapICMP1659|ALQ59_02885	Cluster_2089.1	Type III secretion related protein	PapICMP1659_Contig_48	+	54239	54631	393	130	ATGAACTCATCCTCCACTCTACAAAAGCTGCTTGATAGGCGTGGTCAGGCGGCCAACGGAAATTCTGCGACACAGGCCATACAGTGGCAGGAAGGAATGAACCTCACGCTGCATGTGAACGGCGATAGCCTCACGATGTTGGCCGAGATCATCGATCTGCGTGCCGACCCTCAGGACGACATCCTCTTGCGCAAGCTGCTTGCCCATGCTTTTCCGGGCATGCGGCTACGACGCGGCGCGTTGACCATCAACCCGGACGAGAACACGTTGGTGTACTCCTACGAGCATGACTTTCTCGCGCTGGACAAGGCCCGATTCGAAAATCTGCTGGCTAATTTTGCCGAAACAACGCAGGAGTTGCGTAATACCGCGCAGCGCCTGCGTTACCGCTGA	MNSSSTLQKLLDRRGQAANGNSATQAIQWQEGMNLTLHVNGDSLTMLAEIIDLRADPQDDILLRKLLAHAFPGMRLRRGALTINPDENTLVYSYEHDFLALDKARFENLLANFAETTQELRNTAQRLRYR	29	+	54177	54210	TGGGAACCACAGCGTGCGTTCCAGCCACTCACCG
Pseudomonas syringae	1	PapICMP1659	PapICMP1659|ALQ59_04170	Cluster_4422.1	Type III secretion related protein	PapICMP1659_Contig_9	+	115128	116102	975	324	ATGACCATGGGTGTTTCACCTATTCGTAACTCAAACTCCCTACCGATCGATTTTTCGTCGTTGAGCGCAAAGAGTGGCGGGCATAACGGGCTGGGCAGCGGAGACAATTCGACTATCGACCCGAGTACGTTGTTGTTCGGCAATCAAGGGCAGACGCAGGTCAATTTCGCTCCGCCCAACAGCACGGACTCCTCAACCAGCGGTGTGAACGCTGCGTCAGGCAATACGGCGTCCGGCCTGGTCGAGCAAATCATGAGCCTGCTGAAACAATTGATGCAGATGCTGATGCAAAACAACAATGCTTCCGGTAACCCTCAGACTGATTCGTCAACGCCAGGCGTCGGCAGTGGCAACAGCGTCGGGAGCGGCGGTACTGGAAGCAGTCTCGCAGGCAGTGAC…	MTMGVSPIRNSNSLPIDFSSLSAKSGGHNGLGSGDNSTIDPSTLLFGNQGQTQVNFAPPNSTDSSTSGVNAASGNTASGLVEQIMSLLKQLMQMLMQNNNASGNPQTDSSTPGVGSGNSVGSGGTGSSLAGSDGGDETSGVGNGGLGDAGSTPTTSAADGVPSDTSLTGSGGLHLPQQLEQYRGDIMDAAKATGLTPSVIAGQIWAESRGQLNAATTNVNGKADAGLMQVNADTFKSLQQQNPGLLGNDVNDSHTNIMAGALYLRDQNKEFGDMGAALRAYNSGPDKVNKADLSDTGGVGGSSYPADVLNFAKIIESGQGNLPA	89	+	115008	115039	GGGAACCGAGTCACTCAGTGAACCACTCAGTT
Pseudomonas syringae	1	PapICMP1659	PapICMP1659|ALQ59_04418	Cluster_11392.1	Type III secretion related protein	PapICMP1659_Contig_108	+	43976	44430	455	152	ATCGGCAGCGCCTGGAGCCTGACACGCCCGGCAGCCATCGTGCTCGACCAAGGCCCGGCGCACATCGCCTCAGCCATGACAACCGCGCCCGGCATGCCGAACGCTGCGCCCAAAACATCGCAACCTGCAGCGAAACCCGCCGGCCCGGCGACTGACAAGCGCGTTCGCCTGGCCAGCATGGAAGCTGTGCGGCATCAGCTCACTACCATGCTCAGCGACCGCATGCTGACTGACGTCAGCGTGGCCGAAACGCCAGAGGGATTGATGCTCAATGGGCATCTCAAGGAAGAGTCGCTGGTGGTCTATCAGCGCATGCTGCAGCGTTTCAAGGACCGTTTTGACTCACCCGTGACGGTGCTTGATAACGTCGCCAGCGCGCGCAATACCCTGCCGTTTGTT…	MGSAWSLTRPAAIVLDQGPAHIASAMTTAPGMPNAAPKTSQPAAKPAGPATDKRVRLASMEAVRHQLTTMLSDRMLTDVSVAETPEGLMLNGHLKEESLVVYQRMLQRFKDRFDSPVTVLDNVASARNTLPFVVVQIMTGPHAHLVTADGRR	133	+	43822	43843	CGGAACCGACGGCCACTCATCG
Pseudomonas syringae	1	PapICMP1659	PapICMP1659|ALQ59_04556	Cluster_4702.2	Type III secretion related protein	PapICMP1659_Contig_134	-	12610	13773	1164	387	TTGCCCCCTCATCAGAGGGGGCCGCTACCTTGGGATGGGCGTTTTATGCAAGCACTTAACAGCATCAGTTCGTTGCAAACCTCTGCATCATTGTTCCCCGTGTCGCTCAACAGCGATGTGAGCGCCAACACCAGCACTTCCAGCAAAGAGCTCAAGGCTGTGATCGATCAGCTGGTTCAGGCGCTGACCCAAAGTGGGCAGCTCGATGAAACCTCACCGCTCGGCAAAATGCTCGCCAAGGCCATGGCTGCGGATGGCAAGTCGGCTAACAGCATCGATGACATCACTGCATCGCTCGACAAGCTGATCCACGAAAAGCTCGGCGACAATTTCGGTGCCTCTGCCGGCATCGGCGCGGGTGGCGGTGGCGTTGGCGGTGGCATTGGCGGGGCGGGTTCT…	MPPHQRGPLPWDGRFMQALNSISSLQTSASLFPVSLNSDVSANTSTSSKELKAVIDQLVQALTQSGQLDETSPLGKMLAKAMAADGKSANSIDDITASLDKLIHEKLGDNFGASAGIGAGGGGVGGGIGGAGSGSGVGGGLSSDAGAGQSDLMSQVLNGLGKAVLDDLLTPSGEGGTTFSSDDMPTLEKVAQFMDDNKAQFPTRDGGSWMNELKEDNGLDAQETAQFRSALDVIGQQLGQQQGDASGVTSGGGLGSPVSDTSLGNPAIDANTGPAANGNASVDVGQLIGQLIDRGLQSVSSGGGLGTPVDNSTQPAGGTPAANPTGNVSNQDLGQLLSGLLQRGLEATLQDAGNTGADLQSSAAQVAAQLINALLQGTNNQTNQAVA	397	-	14170	14202	TGGAACCGATTCGCAGGCTGCTGCCACCTAGTG
Pseudomonas syringae	1	PapICMP1659	PapICMP1659|ALQ59_04990	Cluster_3390.1	Type III Effector	PapICMP1659_Contig_280	-	1523	3772	2250	749	GTGGCGCGAGCATGGGTTCATGGGGCAGGCCACAACTGTAGGCGCCTCGACGGACCAACCTGTTGCCCCAGCAGCCAAACGCGAGAGCCTTTCGGCTCCTGGGAGATTCCAATGATCAGTTCGCGGATCGGCGGGGCCGGTGGCGTCGAACTCAGCCCGGCAAACCAGCAGCACGATACTGTTCCCGCCCAGACAGCTCACCCAAATGCAATCACTGCAGGCATGAATCCGCCGCTGACTCTCGAACAGTCAGGTTCGCATGCTGGAGAAAGCTCGACTACCGGCGCGGCGCGGCTGAATGTCGCGGCGCGACACACACAGCTTTTGCAGGCCTTCAAGGCTGAGCATGGGACGGCTCCGGTCAGCGGCGCGCCGATGATCAGTTCGCGTGCTGCGTTG…	MARAWVHGAGHNCRRLDGPTCCPSSQTREPFGSWEIPMISSRIGGAGGVELSPANQQHDTVPAQTAHPNAITAGMNPPLTLEQSGSHAGESSTTGAARLNVAARHTQLLQAFKAEHGTAPVSGAPMISSRAALLIGSLLQAEPLPFEVMAEKLSPERYQLKQFQGSDLQQRLEKFAQPGQIPDKAEVGQLIKGFAQSVADQLEHFQLMHDASPATVGQHAKADKATLAVSQTALGEYAGRASKAIGEGLSNSIASLDEHISALDLTLQDAEQGNKESLHADRQALVDAKTTLVGLHADFVKSPEARRLASVAAHTQLDNVVSDLVTARNTVGGWKGAGPIVAAAVPQFLSSMTHLGYVRLSTSDKLRDTIPETSSDANMLKASIIGMVAGIAHETVNSV…	437	-	4209	4241	AGGAACTGAAATGCCTATGCCTGCGACTCAGTG
Pseudomonas syringae	1	PapICMP1659	PapICMP1659|ALQ59_04991	Cluster_4528.1	Type III secretion related protein	PapICMP1659_Contig_280	+	4458	4603	146	48	ATGAGCATCGGCATTACACCCCGGCCGCAACAGACCACCACGCCACTCGATTTTTCGGCGCTAAGCGGCAAGAGTCCTCAACCAAACACGTTCGGCGAGCAGAACACTCAGCAAGCGATCGACCCGAGTGCACTGTTGTTCGGCAG	MSIGITPRPQQTTTPLDFSALSGKSPQPNTFGEQNTQQAIDPSALLFG	122	+	4306	4336	GGGAACCGGTCGCTGCGCTTTGCCACTCACT
Pseudomonas syringae	1	PapICMP1659	PapICMP1659|ALQ59_05428	Cluster_406.1	Type III Effector	PapICMP1659_Contig_8	-	5463	8036	2574	857	CTGAGCCGATGGAGCCCGCTCATGACCTTAAGAATCAATACTCGTTCTGCTACCCCGGTTGTACCTCTGGAAACAGGCTCTACATCGCAGCCGACACCACCGCCGGTCACGGCAAGAGCGACTGAGCCTCCCCCCGTCGCCAATCCTGCGGCGCCTAAATCAGCGCCAGGTGTTCAGCAAGCACACGGGCTGAAGACGCGCATCGCTGGCAAGCTTTCCGAACGTCAGACCAATTTCAGTCTCGGGATTCCCGGCACTGGTCGTACTCTCAACCGGCCCTTGCGCAGCGGGATTCCGGAGGAAGGTGAGCAGGTATCGAACGAGGAGAGTCATGATCCGTTGCTCAAGGAAGCGCATGAACTGCAGCGCATGGTGGAGTCGGCGCTGACCCATCTGAAG…	MSRWSPLMTLRINTRSATPVVPLETGSTSQPTPPPVTARATEPPPVANPAAPKSAPGVQQAHGLKTRIAGKLSERQTNFSLGIPGTGRTLNRPLRSGIPEEGEQVSNEESHDPLLKEAHELQRMVESALTHLKAAPTSLWERPAPSTVRRITTKVFPWLKPAPLREVASNGSNAKTKIRINSQQSPETIAAAVKELSTRLDHQSKVLATATHALVAAREHLESLEQATPPSSTERLDHARARVQQADSTTRLASQQLRELIQGTEVLQLGALSEGQDQVEQKAEFSQQWLSELRTRMQAVDVRFADRHAAIEIELQLKVAQTRELISLDHDMTAAEHTAAQANTQLSALRAQRQETPEGSDEADRLDTAIGQTLATRSQAMQTHQQLAKRLVRVDADVA…	256	-	8292	8323	CGGAACCGAATCCATATTTCGACCACCCATCC
Pseudomonas syringae	1	PapICMP1659	PapICMP1659|ALQ59_100343	Cluster_49085.1	Type III secretion related protein	PapICMP1659_Contig_134	-	9930	10172	243	80	CTGCTGGAGCACCAGGACATGATCAGTTTCAACAGCTTGCAACGCCATCTCGACAACTCGGTGAGCCGTGCTCACACCAACATGGACCAGGCAGCGATGGAAGCCTCCGAGAGTGGTACCGTCGAAGACCTGCAGGCATTCAACGATGCCCAGCAGCAGGTCGATGTCGCCGGTATTGCCGTCAATGAATGCCTGCGTGCCAAGCACGGTATCAATAAAGCAGTCATCGATGGAATTCAGTGA	MLEHQDMISFNSLQRHLDNSVSRAHTNMDQAAMEASESGTVEDLQAFNDAQQQVDVAGIAVNECLRAKHGINKAVIDGIQ	12	-	10184	10216	TGGAACCGCTCGGCGGGTTTGCTCCACTCAAGG
Pseudomonas syringae	1	PapICMP1659	PapICMP1659|ALQ59_101161	Cluster_7521.1	Type III Effector	PapICMP1659_Contig_25	-	62622	63431	810	269	ATGACAAACGTCTCTGGACACATTGGAAAATACCCGAGCCTCGCTAACGTTCAGGCTGGGTCTTCGGCGTCGGTCGAAAACCAGATGCCTGATCCTGCTCAGCACAGCGATGGTCGGTGGAAACAGCTTCCGACTCAGCTATCGTCTATTGCATTGTCGAGATTTGATCAAGATATTTGCACGAATAATCACGGCATAAGCCAGCGTGCAATGTGCTTTGGCCTTTCGTTGAGCTGGATCAATATGATTCATGCAGGGAAAGACCATGCAACACCCTATGCGTCGGCAGAAAGAATGAGATTTTTGGGGTCATTCGAGGGTGTGGTGCACGCTCGTACTATTCATAACTTTTATCGAACTGAACATAAGTTTCTGTTGGAGCACTCGTCCTCAAATCCC…	MTNVSGHIGKYPSLANVQAGSSASVENQMPDPAQHSDGRWKQLPTQLSSIALSRFDQDICTNNHGISQRAMCFGLSLSWINMIHAGKDHATPYASAERMRFLGSFEGVVHARTIHNFYRTEHKFLLEHSSSNPGVSTGAMAGTESLLQAAEIKGLKLRPVLEDESNSGLPFLIACKQSGRQIVTDEAALNSLCEAIVENRKGVLVIYSEEIAHALGFSVSPDGKSATLFDPNLGEFHTHSKALADTIENISSADGLTLVGVQIFASKMR	29	-	63460	63491	GGGAACCGATTCGCTTCTAAAACCACTCAATC
Pseudomonas syringae	1	PapICMP2814	PapICMP2814|ALO87_00201	Cluster_2333.2	Type III Effector	PapICMP2814_Contig_103	-	53879	54742	864	287	ATGAACATTACGCCGCTCACGTCAGCCGCGGGCAAGGGCTCGTCCGCACAAGGCACAGACAAAATTTCCATTCCCAACTCCACGCGCATGATCAATGCCGCGTCAATCAAGTGGTTGAACAAGGTGCGTAGCGCCATCAGTGACCACATCCGCACCAGCATCGAGAAAGGGAAACTGTTCGAGCTCGCCTCCTTGGGCAGCAACATGTTCGGTGTCCCGGCTCTTTCAGCGCGCCCCTCGACGCTCCAACCTGTGTTGGCGTTTGAGGCTGACCCCAATCACGACCTGAACCTTGTCAGGGTCTATATGCAGGACAGCGCCGGCAAGCTCACTCCCTGGGACCCGACGCCCAACGCGGTCACGACGACGTCGAATCCATCAGAGCCTGATGCGCAGAGC…	MNITPLTSAAGKGSSAQGTDKISIPNSTRMINAASIKWLNKVRSAISDHIRTSIEKGKLFELASLGSNMFGVPALSARPSTLQPVLAFEADPNHDLNLVRVYMQDSAGKLTPWDPTPNAVTTTSNPSEPDAQSDTASSSLPRRPPAGSVLSLLGIALDHAQRHSPRADRSAKGRPGREERNGARFNAKQTKPTEAEAYGDHQAPDPDLTRPKETAQRVAESINSMREQQNGMQRAEGLLRAKEALQAREAARKQLLDVLEAIQAGREDSTDKKISATEKNATGINYQ	22	-	54764	54795	AGGAACTCATTACCGCGAATCGCCACTCAGCA
Pseudomonas syringae	1	PapICMP2814	PapICMP2814|ALO87_01878	Cluster_4702.2	Type III secretion related protein	PapICMP2814_Contig_31	+	44505	45617	1113	370	ATGCAAGCACTTAACAGCATCAGTTCGTTGCAAACCTCTGCATCATTGTTCCCCGTGTCGCTCAACAGCGATGTGAGCGCCAACACCAGCACTTCCAGCAAAGAGCTCAAGGCTGTGATCGATCAGCTGGTTCAGGCGCTGACCCAAAGTGGGCAGCTCGATGAAACCTCACCGCTCGGCAAAATGCTCGCCAAGGCCATGGCTGCGGATGGCAAGTCGGCTAACAGCATCGATGACATCACTGCATCGCTCGACAAGCTGATCCACGAAAAGCTCGGCGACAATTTCGGTGCCTCTGCCGGCATCGGCGCGGGTGGCGGTGGCGGTGGCATTGGCGGGGCGGGTTCTGGTTCGGGTGTCGGCGGCGGTCTGAGCAGCGACGCGGGCGCCGGGCAATCC…	MQALNSISSLQTSASLFPVSLNSDVSANTSTSSKELKAVIDQLVQALTQSGQLDETSPLGKMLAKAMAADGKSANSIDDITASLDKLIHEKLGDNFGASAGIGAGGGGGGIGGAGSGSGVGGGLSSDAGAGQSDLMSQVLNGLGKAVLDDLLTPSGEGGTTFSSDDMPTLEKVAQFMDDNKAQFPTRDGGSWMNELKEDNGLDAQETAQFRSALDVIGQQLGQQQGDASGVTSGGGLGSPVSDSSLGNPAIDANTGPAANGNASVDVGQLIGQLIDRGLQSVSSGGGLGTPVDNSTQPAGGTPAANPTGNVSNQDLGQLLSGLLQRGLEATLQDAGNTGADLQSSAAQVAAQLINALLQGTNNQTNQAVA	442	+	44031	44063	TGGAACCGATTCGCAGGCTGCTGCCACCTAGTG
Pseudomonas syringae	1	PapICMP2814	PapICMP2814|ALO87_01879	Cluster_28714.2	Type III secretion related protein	PapICMP2814_Contig_31	+	45645	46019	375	124	GTGACCATTTCCCAACTCAGCAATTTGAAAAGTGTATCGCCGGAGCTTGGGCAGAATGCTCATCAGGGGCTCGGCTCCGAACCCGTTCAGGCGGATGTCGACCTATTCAATGCGGCGATGCGCCCTGACAGCGGGCCCGCAGCGTCGCACCTGTCCGACCGGATAGCCAGTGCGCTGTCCGAGCGGCTGGGCAGTACCGAGAAGCTTTCACAGCAAGCATTACGCCAGATGAAGAAAGTGTCGAACACCGAAGATCCTGGAGACATCGTGCAGATGAGTCGGGCGTTGTCGCAGTGCTCGTTGCAAATGGCGTTGACGACCAAGGTCGTGAGCAAGAGCGCTCAGGCGCTCGACAAGTTGACCAACCTGCAGTAG	MTISQLSNLKSVSPELGQNAHQGLGSEPVQADVDLFNAAMRPDSGPAASHLSDRIASALSERLGSTEKLSQQALRQMKKVSNTEDPGDIVQMSRALSQCSLQMALTTKVVSKSAQALDKLTNLQ	1582	+	44031	44063	TGGAACCGATTCGCAGGCTGCTGCCACCTAGTG
Pseudomonas syringae	1	PapICMP2814	PapICMP2814|ALO87_01882	Cluster_49085.1	Type III secretion related protein	PapICMP2814_Contig_31	+	48055	48297	243	80	TTGCTGGAGCACCAGGACATGATCAGTTTCAACAGCTTGCAACGCCATCTCGACAACTCGGTGAGCCGTGCTCACACCAACATGGACCAGGCAGCGATGGAAGCCTCCGAGAGTGGCACCGTCGAAGACCTGCAGGCATTCAACGATGCCCAGCAGCAGGTCGATGTCGCCGGTATTGCCGTCAATGAATGCCTGCGTGCCAAGCACGGTATCAATAAAGCAGTCATCGATGGAATTCAGTGA	MLEHQDMISFNSLQRHLDNSVSRAHTNMDQAAMEASESGTVEDLQAFNDAQQQVDVAGIAVNECLRAKHGINKAVIDGIQ	12	+	48011	48043	TGGAACCGCTCGGCGGGTTTGCTCCACTCAAGG
Pseudomonas syringae	1	PapICMP2814	PapICMP2814|ALO87_01886	Cluster_18957.1	Type III secretion related protein	PapICMP2814_Contig_31	+	51019	51378	360	119	ATGATTGAGGTAACGGAAAAGTCGGCATTTTACGCTCAGGTTGCCGCCCAGAGCCCAGCAGTATGGCCAGTGGCCAATGGCGTCGCGTTTGTCAGTCGGCGCGAACACCATGATTGGGGGATCGCCTTGCACATAGAAGGCCGCGCGTTGCGTCCCGATCAACTGCGTGATGCACTGCAACGACGTTTTATGGAGTCAGAGCGTTTCAATCACTACTTCCTGTTTCTGGACGTACGACGCGACTTTGTGGTGTGGCACGCGGTCAACGAAAAACCGGGTTCCTACGCCAGCCTGGACGACATCCGCCGGCATGAGTTGATGCTGGCAGGGCTGGACCATTTGAGCGAGGAAATGCACTGA	MIEVTEKSAFYAQVAAQSPAVWPVANGVAFVSRREHHDWGIALHIEGRALRPDQLRDALQRRFMESERFNHYFLFLDVRRDFVVWHAVNEKPGSYASLDDIRRHELMLAGLDHLSEEMH	2976	+	48011	48043	TGGAACCGCTCGGCGGGTTTGCTCCACTCAAGG
Pseudomonas syringae	1	PapICMP2814	PapICMP2814|ALO87_01893	Cluster_3403.1	Type III secretion related protein	PapICMP2814_Contig_31	-	55831	56400	570	189	ATGACCGCACCGATCAAAACCCCGGCCAAAGCGCCACCAGCACCCCAGCGCCCTGCGCCTGTCGAGCGGCCAGCCACAACTCTCAGTGAAAAACCATTCGGTGAAAAACGCCTTGCATCCGGTGGCCTGGGCCGTGGCGATGTACAGACCAGCCGTTCGGTACTGAGCAAGTCGCTGCAAGACACCCCGATGAGTGCCGACGGCATGTTCTTTTCGCAACTGCTGGTGCCGCCCGTAAGTGCCGAACCTGGTCAGCAAGGCTTTGGCGGGGGCGGTATAGCCTTTCCGGTACGCGCAGAACAAGTGCCGACCCAACTGATCGACGAGCTGGCGCAGCGCCTGCCGGATCAGCCTGACGGCCCCCTCAGTTTCACCCTGCTGATGCCCAGCCTGGGCAGC…	MTAPIKTPAKAPPAPQRPAPVERPATTLSEKPFGEKRLASGGLGRGDVQTSRSVLSKSLQDTPMSADGMFFSQLLVPPVSAEPGQQGFGGGGIAFPVRAEQVPTQLIDELAQRLPDQPDGPLSFTLLMPSLGSVRVNANKTENRWSVQLGFARRDVLKRLSAHTGACRDSLSQALGQDVELDMHEDLSA	6048	-	62448	62480	GGGAACTGATCCGGGACCGTGACCCACTCAGCG
Pseudomonas syringae	1	PapICMP2814	PapICMP2814|ALO87_01898	Cluster_4852.1	Type III secretion related protein	PapICMP2814_Contig_31	-	61315	62421	1107	368	ATGAAAATCGTCGCTCCGCCTATCATGCGAATACTTCCGGTCGCGCCGACCCGCGTCGTGACGCCTGCTGCGCAGCCACTTCCCAATGCTGATCTGCACAATTCAGGGACTTCGCCACAACAGGTTTCGCGCTTCGCGGCCGCGCTCATCCAGCACAGACGCATCCTCATTCAGCGCGACCTGATCGCCAGCAACAATGCCTTGCAGTCGCGAGCGGTGAAGCTCGGTGAGCTTTATCAACTGCTGATGACCGATCAGGACACCGGGCTGGATAACGCGGCCAGGGTATTGCGCAAAAAGCTCATGCAGGATGACTCGTCCTCAGATCTGAAACAGGTTCTGGATTACACCGACGGTGATGCCGCCAAGGCTCATGTGGTGTTGCAAGCCGCCAGGAAG…	MKIVAPPIMRILPVAPTRVVTPAAQPLPNADLHNSGTSPQQVSRFAAALIQHRRILIQRDLIASNNALQSRAVKLGELYQLLMTDQDTGLDNAARVLRKKLMQDDSSSDLKQVLDYTDGDAAKAHVVLQAARKQAEADGEMGEHVVLTQQLKQLRRKYGPRARAGINSAKAFARPNIDNKRRVALRNLYSVAVSGQPNITGLIEALLGEQQEAGQFNIDLRDMRTAIADDLSAMTPSASHEQLRTLMHGLNTARHVTTLLKGCEHLLGRMRNKNPDLTVDPPAFLKHLLTLTANGMNVNQTLQLTQHIGGKQLKHQLAFLNGLRPMLLQLPILLWRDMKSRQTALSNLLILMAELTTQEQKQLYGGLV	27	-	62448	62480	GGGAACTGATCCGGGACCGTGACCCACTCAGCG
Pseudomonas syringae	1	PapICMP2814	PapICMP2814|ALO87_01900	Cluster_477.1	Type III Effector	PapICMP2814_Contig_31	+	63306	65648	2343	780	ATGCGTATATCCAGTTCTCCCTTCGTTATCGTGAACCAACCCACTCCTGGCGAACTGGCTCTGGCTGTTGAGTCGCCTCTTGCCAAAGCCTTGCCGACACCTGCGGGTGGCGGTGGGCAAGCCGGCGTGCAGTTCGGTCAGCCGGCCGGCAACACGCAAGGCGCGCCGACAGGAGCCGAGCAGACCGCGTCGTCTATCCTGGCTCTTTTGCTCCAGGGCAGTGGCGGGGCAGCTGCCAATGCCAATGTGAATAATCAGGTCCAGCCGCAACCCTGCGCAGATTCTCCTGCCGAGGCTGCACCGACTGAAGCGACTGCCCCGGCCGCTCCGGTTGAACAGGTCGCAGCTCCCACGAACACAGATGCAACCGACGCTTCCAACGCCCCAAAAGCCGCAGAC…	MRISSSPFVIVNQPTPGELALAVESPLAKALPTPAGGGGQAGVQFGQPAGNTQGAPTGAEQTASSILALLLQGSGGAAANANVNNQVQPQPCADSPAEAAPTEATAPAAPVEQVAAPTNTDATDASNAPKAADAAFLDNSEYSSPEALKRWEPMVAHLPPEEREQAAKELNRPIAAAWMARDDGPDAGKAMDFINANPALKTAVDVAQGGGNADGKITNKDLKTFAKNMEKAADSADKDLANYTKDNPDADPQSLEMVRSAAVMRANMPLAIAADPHHAVDAADKTKVDGNVDAEDLKGLAQSNPGLSGALKQSCSTWSQPGFLGQVDEAGMSGRKKAAHSPDKMFDAKNLSEWIKKSAPTNGGQFASMLSDSATLNAVAGIDISKLDKDVFDKPKSYS…	32	+	63243	63274	TGGAACCAACTTGCACCTTCAACCACACAGTT
Pseudomonas syringae	1	PapICMP2814	PapICMP2814|ALO87_03629	Cluster_828.1	Type III Effector	PapICMP2814_Contig_7	+	14228	16996	2769	922	ATGATGCCATCTCAGATCACGCGCTCCTCTCATTCATCCTCGCCGGATGCCTCTCAACCGGCTTGCGATGCTGCAAGTAGCCTCGAGCAATCGCCGCAGCAGGTCCGCACCCGGGCGTTTGTCGCCAAAGGCAAACTGTCTGAGGCATTCGGGCGCACGTCTACTGCGCCGGCGCAGGATGCGGTGCACCTGCTGAACAATCTTCAGCGCGAGCTGGCGAAAGAGAATCCGTCTGGTCCCGAGCTTGCCCTGCTGGGCAAAGAGCTCGCCGCTGCCGCGATGACCGAGCAGGGCTCGCATCTGCTGGCCACCGAAGAACACCAGCACGTGTTGAAAGACGTGCTTGATCGTTGCATGCGCCAGTTGGCGGATACGCCTGCGTCTAATGCGTCCCATGTA…	MMPSQITRSSHSSSPDASQPACDAASSLEQSPQQVRTRAFVAKGKLSEAFGRTSTAPAQDAVHLLNNLQRELAKENPSGPELALLGKELAAAAMTEQGSHLLATEEHQHVLKDVLDRCMRQLADTPASNASHVPLSQACEGLKTARLHQSLAMLTGTSHTQTRGVADLLALTQLDPKVLAEKLDGQAPYESFGHFIRTARDSTAALNVSLSDPAGETTGLLRAQADTLEALEKLPAILAALIEHCPDMPTQKDLRSLKDAAGELLTKLRESALLKGSEEIVSEAGESPVHGRESVEPALTRSQALLKAGGKLVRKFDAYGAVAPMDDKKLLALLRTPAPHLSPAQMHAFLNRYAIQLTDEQRTIVSNTALPPASEGDIEAQGGMGFDEKLRLALADGSL…	44	+	14153	14184	GGGAACCGTTCCGGATCGAGCGCCACTTAGCC
Pseudomonas syringae	1	PapICMP2814	PapICMP2814|ALO87_03634	Cluster_3432.1	Type III Effector	PapICMP2814_Contig_7	+	24638	25540	903	300	ATGAAAATATCCGGCTCCACATCGCCTGCACACACTTCAACGAATTCCGCGCAGAAGTCCTCTTCAAAAGGTCTGCTGAGTGGTTTGGCCAAGCATTTCAAGGGGATGCTCGTTTCTGGCAACACTTCTGGTCATTCGACGCTCGGGCATTACGCGTCATCCAGCAGCGGCTCTAAAGGCAAGGCACCGGTACGGGACGATTACAGCAACGGGCCGCAAACACGCCTTAACAACACACCTCTGAAACGAGCGCTGGCCCGAGAGCTTGATCGCTTTGGCTACGGTTCATCGGCGACCGAGTCTTTTGACCGCTCATTGCAGCGTAAGGATAAAAATCCAGAGCTTGGTCACCTTGATGACGACGAGTACCTCGCTTTGCGCATGTACACAACGCCGTTT…	MKISGSTSPAHTSTNSAQKSSSKGLLSGLAKHFKGMLVSGNTSGHSTLGHYASSSSGSKGKAPVRDDYSNGPQTRLNNTPLKRALARELDRFGYGSSATESFDRSLQRKDKNPELGHLDDDEYLALRMYTTPFYRAVNHQLRDGKPSEDMKVVVEAMNKGLKRLAEHPDNVVKETLYRGINKVVDDKFIHKNFKLGEVYRDKTFVSATPDLSTVNATFTRHTVKSSKAKASAPVYQRSPLLEIESRSAVRVRQVSLSSAEEEGIFAPDTPFLVADKSRTDSGRWHIKLKEIDESDESSGL	516	+	24091	24122	TGGAACCGGACGAGGCTTTCGGCCACTCAATG
Pseudomonas syringae	1	PapICMP2814	PapICMP2814|ALO87_04509	Cluster_6364.1	Type III Effector	PapICMP2814_Contig_107	-	10295	11437	1143	380	ATGAACCCCATTCAGTCACGCTTCTCCAGTGTGCAAGAGCTCAGACGATCCAACGTTGATATTCCGGCGCTCAAAGCCAATGGCCAACTGGAGGTCGACGGCAAGAGGTACGAGATTCGTGCAGCCGATGACGGAACAATTTCGGTCCTTCGACCGGAGCAACAGTCCAAGGCGAAAAGTTTTTTCAAGGGCGCTTCTCAGTTGATAGGTGGCAGCAGCCAGCGCGCGCAGATTGCCCAGGCGCTCAACGAGAAAGTCGTATCGGCACGCACTGTATTGCACCAGGGCGCTGTGACGGGCGGACGCTTGGACACCCTTGAGCGGGGCGAAAGCAGCTCAGCCACAACAGCCATCAAACCCACTGCCAAACAGGCTGCGCAAAGTACTTTTAACAGCTTT…	MNPIQSRFSSVQELRRSNVDIPALKANGQLEVDGKRYEIRAADDGTISVLRPEQQSKAKSFFKGASQLIGGSSQRAQIAQALNEKVVSARTVLHQGAVTGGRLDTLERGESSSATTAIKPTAKQAAQSTFNSFHEWAKQAEAMRNPSRMDIYKIYKQDAPHSHPMSDEQQEEFLHTLKALNGKNGIEVRTQDHDSVRNKKDRNLDKYIAESPNAKRFFYRIIPKHERREDEHQGRLTIGVQPEYAAQLTRAMATLIGKESAITHGKVIGPACHGQMTDSAVLYINGDVAKAEKLGEKLKQMSGIPLDAFVEHTPLSMQSLSKGLSYAESILGDTRGHGMSRAEVISDALRMDGMPFLARLKLSLSANGYDPDNPALRNTK	455	-	11892	11924	TGGAACCGCCTCGAGCAGAGGCTCCACTCATTG
Pseudomonas syringae	1	PapICMP2814	PapICMP2814|ALO87_04833	Cluster_452.1	Type III Effector	PapICMP2814_Contig_24	-	77452	83325	5874	1957	ATGGTCAAGGTTACCTCTTCCGGATTTACTGCCAACCCTCTCTCTCATCATGCGGACAGTGTTTCCCCCGCGAACAGTCCCCCTCAGTTACCGGAGCCTGTGCCTCTGGTTGATCTAAGCGAGTCGTCCCGCAAGGGCGGCATGCGAAATCGGCCGCATGCCAGTTTGAACAGTCAGGTGCTCGGACTGCAAGCGGTGCCGTCGCAACGTGGAAAGCATGTTCGTGTCAGAAGTCATGCCGATGGCGAGAGTGTCATTAATGCCTGGCTGGCAAAGCGCCCCTCGGTTCAAAGCGAAACCAGTCTTGATAACGATGGCAAACTGGTGCGTTACACCCCCGTGAATCATGAGCCGCTGGCGCCGCGCAATGAGGCGTTTTTCACCTCTGTGCCGGGGATG…	MVKVTSSGFTANPLSHHADSVSPANSPPQLPEPVPLVDLSESSRKGGMRNRPHASLNSQVLGLQAVPSQRGKHVRVRSHADGESVINAWLAKRPSVQSETSLDNDGKLVRYTPVNHEPLAPRNEAFFTSVPGMLMAVLTVHPEMEHGISGDITADAVAARLAEPPIGLLTGIWQSSHDRAYLERGGVVHTANMEERWAPLTLPGINPREPLRMAGLQADGGVYLHNGSQLWRLTETAAESVTTENLPEGAAVRIGAGGEVHGLHEGALHSNGISRPIELWRPKAGAPGREQSPARPVDLLPLPGGTAALILDDKGRIYHADLKGTGAVEAHRLKLPADFAQGKGWAVTAMGLSRDDTVHLMLQDQNGRRMSLQRAPGEALFRPAYLLDRPLLLLYTEGL…	173	-	83498	83529	CGGAACCGATCCGGTTGCCTGGCCACTCAATT
Pseudomonas syringae	1	PapICMP2814	PapICMP2814|ALO87_04923	Cluster_4528.1	Type III secretion related protein	PapICMP2814_Contig_31	-	29290	30567	1278	425	ATGAGCATCGGCATCACACCCCGGCCGCAACAGACCACCACGCCACTCGATTTTTCGGCGCTAAGCGGCAAGAGTCCTCAACCAAACACGTTCGGCGAGCAGAACACTCAGCAAGCGATCGACCCAAGTGCACTGTTATTCGGCAGCGACACACAGAAAGACGTCAACTTCGGCACGCCCGACAGCACCGTCCAGAATCCGCAGGACGCCAGCAAGCCCAACGACAGCCAGTCCAACATCGCTAAATTGATCAGTGCATTGATCATGTCGTTGCTGCAGATGCTCACCAACTCCAATAAAAAGCAGGACACCAATCAGGAACAGCCTGATAGCCAGGCTCCGTTTCAGAACAACGGCGGGCTCGGTACGCCATCGGCCGATAGCGGGGGCGGCGGTACA…	MSIGITPRPQQTTTPLDFSALSGKSPQPNTFGEQNTQQAIDPSALLFGSDTQKDVNFGTPDSTVQNPQDASKPNDSQSNIAKLISALIMSLLQMLTNSNKKQDTNQEQPDSQAPFQNNGGLGTPSADSGGGGTPDATGGGGGGDTPSATGGGGGDTPTATGGGGSGGGGTPTATGGGSGGTPTATGGGEGGVTPQITPQLANPNRTSGTGSVSDTAGSTEQAGKINVVKDTIKVGAGEVFDGHGATFTADKSMGNGDQGENQKPMFELAEGATLKNVNLGENEVDGIHVKAKNAQEVTIDNVHAQNVGEDLITVKGEGGAAVTNLNIKNSSAKGADDKVVQLNANTHLKIDNFKADDFGTMVRTNGGKQFDDMSIELNGIEANHGKFALVKSDSDDLKL…	122	-	30689	30719	GGGAACCGGTCGCTGCGCTTTGCCACTCACT
Pseudomonas syringae	1	PapICMP2814	PapICMP2814|ALO87_05074	Cluster_406.1	Type III Effector	PapICMP2814_Contig_47	-	6106	10215	4110	1369	CTGAGCCGATGGAGCCCGCTCATGACCTTAAGAATCAATACTCGTTCTGCTACCCCGGTTGTACCTCTGGAAACAGGCTCTTCGTCGCAGCCGGCACCGCCGCCTGTCACGGCAAGAGCGACTGAGCCTCCCCCCGTCGCCAATCCTGCGGCGCCTAAATCAGCGCCAGGTGTTCAGCAAGCACACGGGCTGAAGACGCGCATCGCTGGCAAGCTTTCCGAACGTCAGACCAATTTCAGTCTCGGGATTCCCGGCACTGGTCGTACTCTCAACCGGCCCTTGCGCAGCGGGATTCCGGAGGAAGGTGAGCAGGTATCGAACGAGGAGAGTCATGATCCGTTGCTCAAGGAAGCGCATGAACTGCAGCGCATGGTGGAGTCGGCGCTGACCCATCTGAAG…	MSRWSPLMTLRINTRSATPVVPLETGSSSQPAPPPVTARATEPPPVANPAAPKSAPGVQQAHGLKTRIAGKLSERQTNFSLGIPGTGRTLNRPLRSGIPEEGEQVSNEESHDPLLKEAHELQRMVESALTHLKAAPTSLWERPAPSTVRRITTKVFPWLKPAPLREVASNGSNAKTKIRINSQQSPETIAAAVKELSTRLDHQSKVLATATHALVAAREHLESLEQATPPSSTERLDHARARVQQADSTTRLASQQLSELIQGTEVLQLGALSEGQDQVEQKAEFSQQWLSELRTRMQAVDVRFADRHAAIEIELQLKVAQTRELISLDHDMTAAEHTAAQANTQLSALRAQRQETPEGSDEADRLDTAIGQTLAARSQAMQTHQQLAKKLVRVDADVA…	261	-	10476	10507	CGGAACCGAATCCATATTTCGACCACCCATCC
Pseudomonas syringae	1	PapICMP2814	PapICMP2814|ALO87_05140	Cluster_988.1	NA	PapICMP2814_Contig_51	-	7397	8524	1128	375	GTGTCGGGTCGGTGCTGTGCATTTCCAGCAAGTCTTCACGGACAGTTTTCTGTTTCATCTGCCACTGACGGCGAGCCACTTTGGGTGTTTTTGATAATGTGGGGCATGGATTTGCGAGGGTTTTACAGGATTGCAGCGTGCCTTGTGTTGCTGCTGTGTGGTGGCTGTGGCCAGGAGCGCAAGCTGGAGAGCTTTGGCGGGCCAACCATGGGCAGTCACTATTCAGTGGTGTATGTCCGCGGTGCCGGGCAGCCTGACCCGGTGGTAATGCGCCCGGAGGTCGAAGCCATTCTGGCTGACGTCGATCAACAGATGTCGCTGTGGCGCAGTGACTCGGACATTGAGCGTTTCAATGCGCTGCCAGCCAACAGCTGCCAGATCATGTCCACGTCGGTTTTG…	MSGRCCAFPASLHGQFSVSSATDGEPLWVFLIMWGMDLRGFYRIAACLVLLLCGGCGQERKLESFGGPTMGSHYSVVYVRGAGQPDPVVMRPEVEAILADVDQQMSLWRSDSDIERFNALPANSCQIMSTSVLHLIRVGEQLSRESDGAFDLTVKPLMDLWGLGAHALFEQMPLVRQLARTRTLVGYRNLRIVGQQLCKNAAVQVDLNSIAAGYAVDRITERMDALGVHDYMVQATGELKVSGLKPDGSPWRVNLDAPSDDGYDAPKLFPLTGHAMSTSGDYRRYRGGNGRHISDTLDALTGSPVNHGLASVTVLHPSALMADGLSSLLLILGPERGWNYAQEHKIPAFFVIRADKRFIIRSNASFDRLAVRSSQ	15	-	8539	8572	TGGGAACCCTGCGCAGGTCATTGACCACTCAGTG
Pseudomonas syringae	1	PapICMP2814	PapICMP2814|ALO87_05229	Cluster_4422.1	Type III secretion related protein	PapICMP2814_Contig_58	-	46383	47363	981	326	CTGGCTATGACCATGGGTGTTTCACCTATTCGTAACTCAAACTCCCTGCCGATCGATTTTTCGTCGTTGAGCGCAAAGAGTGGCGGGCATAACGGGCTGGGCAGCGGAGACAATTCGACTATCGACCCGAGTACGTTGTTGTTCGGCAATCAAGGGCAGACGCAGGTCAATTTCGCTCCGCCCAACAGCACGGACTCCTCAACCAGCGGTGTGAACGCTGCGTCAGGCAATACGGCGTCCGGCCTGGTCGAGCAAATCATGAGCCTGCTGAAACAATTGATGCAGATGCTGATGCAAAACAACAATGCTTCCGGTAACCCTCAGACTGATTCGTCAACGCCAGGCGTCGGCAGTGGCAACAGCGTCGGGAGCGGCGGTACTGGAAGCAGTCTCGCAGGC…	MAMTMGVSPIRNSNSLPIDFSSLSAKSGGHNGLGSGDNSTIDPSTLLFGNQGQTQVNFAPPNSTDSSTSGVNAASGNTASGLVEQIMSLLKQLMQMLMQNNNASGNPQTDSSTPGVGSGNSVGSGGTGSSLAGSDGGDETSGVGNGGLGDAGSTPTTSAADGVPSDTSLTGSGGLHLPQQLEQYRGDIMDAAKATGVPPSVIAGQIWAESRGQLNAATTNVNGKADAGLMQVNADTFKSLQQQNPGLLGNDVNDSHTNIMAGALYLRDQNKEFGDMGAALRAYNSGPDKVNKADLSDTGGVGGSSYPADVLNFAKIIESGQGNLPA	83	-	47446	47477	GGGAACCGAGTCACTCAGTGAACCACTCAGTT
Pseudomonas syringae	1	PapICMP2814	PapICMP2814|ALO87_100655	Cluster_3390.1	Type III Effector	PapICMP2814_Contig_31	+	31373	33511	2139	712	ATGATCAGTTCGCGGATCGGCGGGGCCGGTGGCGTCGAACTCAGCCGGGTAAACCAGCAGCACGATACTGTTCCCGCCCAGACAACTCACCCAAATGCAGTCACTGCAGGCATGAATCCGCCGCTGACTCCCGATCAGTCAGGGTCACACGCGACAGAAAGCTCGTCTGCCGGCGCGGCGCGGCTGAATGTCGCGGCGCGACACACACAGCTTTTGCAGGCCTTCAAGGCTGAGCATGGGACGGCTCCGGTCAGCGGCGCGCCGATGATCAGTTCGCGTGCTGCGTTGTTGATCGGTAGTCTGCTGCAGGCCGAGCCTTTGCCTTTTGAAGTCATGGCCGAGAAATTGTCTCCTGAGCGCTATCAACTGAAGCAGTTTCAGGGCTCGGACTTGCAGCAG…	MISSRIGGAGGVELSRVNQQHDTVPAQTTHPNAVTAGMNPPLTPDQSGSHATESSSAGAARLNVAARHTQLLQAFKAEHGTAPVSGAPMISSRAALLIGSLLQAEPLPFEVMAEKLSPERYQLKQFQGSDLQQRLEKFAQPGQIPDKAEVGQLIKGFAQSVADQLEHFQLMHDASPATVGQHAKADKATLAVSQTALGEYAGRASKAIGEGLSSSIASLDEHISALDLTLQDAEEGNKESLHADRQALVDAKTTLVGLHADFVKSPEAKRLASVAAHTQLDNVVSDLVTARNTVGGWKGAGPIVAAAVPQFLSSMTHLGYVRLSTSDKLRDTIPETSSDANMLKASIIGMVAGIAHETVNSVVKPMFQAALQKTGLNERLNMVPMKAVDTNTVIPDPFE…	548	+	30793	30825	AGGAACTGAAATGCCTATGCCTGCGACTCAGTG
Pseudomonas syringae	1	PapICMP2814	PapICMP2814|ALO87_101086	Cluster_7521.1	Type III Effector	PapICMP2814_Contig_26	+	90907	91716	810	269	ATGACAAACGTCTCTGGACACATTGGAAAATACCCGAGCCTCGCTAACGTTCAGGCTGGGTCTTCGGCGTCGGTCGAAAACCAGATGCCTGATCCTGCTCAGCACAGCGATGGTCGGTGGAAACAGCTTCCGACTCAGCTATCGTCTATTGCATTGTCGAGATTTGATCAAGATATTTGCACGAATAATCACGGCATAAGCCAGCGTGCAATGTGCTTTGGCCTTTCGTTGAGCTGGATCAATATGATTCATGCAGGGAAAGACCATGCAACACCCTATGCGTCTGCAGAAAGAATGAGATTTTTGGGGTCATTCGAGGGTGTGGTGCACGCTCGTACTATTCATAACTTTTATCGAACTGAACATAAGTTTCTGTTGGAGCACTCGTCCTCAAATCCC…	MTNVSGHIGKYPSLANVQAGSSASVENQMPDPAQHSDGRWKQLPTQLSSIALSRFDQDICTNNHGISQRAMCFGLSLSWINMIHAGKDHATPYASAERMRFLGSFEGVVHARTIHNFYRTEHKFLLEHSSSNPGVSTGAMAGTESLLQAAEIKGLKLRPVLEDKSNSGLPFLIACKQSGRQIVTDEAALNSLCEAIVENRKGVLVIYSQEIAHALGFSVSPDGKRANLFDPNLGEFHTHSKALADTIENISSVDGLPLVGVQIFASKMR	29	+	90847	90878	GGGAACCGATTCGCTTCTAAAACCACTCAATC
Pseudomonas syringae	1	PapICMP2814	PapICMP2814|ALO87_101348	Cluster_23272.1	NA	PapICMP2814_Contig_31	-	68701	68982	282	93	ATGGACGCCCTCAACCCTTTTGCATGGCAAGCACTTAATTGCCATTCACAACCGATCAAGGTGCCCATGATGAAAAAAACCAAACTGCTCAACCGCGCTATCTGCATTGCTTTTTTTCCGCTGGCAGCATTGGCTGGCAACGCCTTCGCGGACTCAGGCTCGGCCTCAGCAGGAACGGGTAGTTCGCAGAGTGCAGCGGATCAGCGTGCAGCCATGGAGGCTGCTGCAGAGGCCGCCAAGCGATGCGGATTCGTTGTCGGACAAGGTAATGTCTGCGATTGA	MDALNPFAWQALNCHSQPIKVPMMKKTKLLNRAICIAFFPLAALAGNAFADSGSASAGTGSSQSAADQRAAMEAAAEAAKRCGFVVGQGNVCD	25	-	69007	69039	TGGAACCGGATGCTCTGCAAGGGCCACGCATGC
Pseudomonas syringae	1	PapICMP2814	PapICMP2814|ALO87_200022	Cluster_2093.1	Type III Effector	PapICMP2814_Contig_33	-	18144	19487	1344	447	ATGCATCGTCCTATCACCGCAGCCTATACCACCTCACGTCTCATCCTAGATCAGTCAAAACAGATATCACGCACCCCATCGGAAAGTAGCGTGCAATCAGCACTTCCTCAGCAAACAAGTATGAGCAGCCCAGTTCTGGAGCGGTCGAAAAGTGCGCCAACTTTATTGACTGCGGCACAGCGCACGATGCTTGCACAAGTGGGCGCATGCAACGCTCATCTGACCTCAGACGAAAACATGGCCATCAATGAACTGAGATTACACAAGCCCCGGTTACCTAAGGATACGTGGTTTTTCACTGATCCTAACAAGGACCCGGATGATGTCGTGACCTACACCTTGGGCAAGCAATTGCAGGCTGAGGGCTTTGTGCACATCACAGACGTAGTGGCAACACTG…	MHRPITAAYTTSRLILDQSKQISRTPSESSVQSALPQQTSMSSPVLERSKSAPTLLTAAQRTMLAQVGACNAHLTSDENMAINELRLHKPRLPKDTWFFTDPNKDPDDVVTYTLGKQLQAEGFVHITDVVATLGDAEVRSQRAEMAKGVFNKLELHDVHVSRGRDYAMNSLQSKEHAKFLLEGHALRAGPGEIHRDSLQDMSRRLARAPHGVGIVVIAGMSDINALITTCPDIVRERVDDITIMGGVEPLKDADGFVQPDARAYNNATDMDAARSLYRKAQELGIPLRIVTKEAAYKTAVSPSFYEGIAGSGHPVGHYLRDVQKSALKGLWEGIQAGLLPGLDDSWFFRTFMPNAQIEAVQLDKNKENSFEDIWPKVTKLNLYDPLTLLASVPGAAKLL…	28	-	19515	19547	TGAAACCGAAACGGCGTTGCTTGCCACACAGCA
Pseudomonas syringae	1	PapICMP2814	PapICMP2814|ALO87_200096	Cluster_9017.1	Type III Effector	PapICMP2814_Contig_33	-	76906	77565	660	219	GTGACCTATGGCATCCGTGGCGGAGCTGGCACATCGGCGTATTACCCCCAGCCCCAGCCCCAGCCTTTTGATGAGTTGAAACTTGACCAGGGACAAATTCAGGAAAAGACGGAAAAGCTTAAAGAGAAAGGATACTTCACTGTTCCCATATCGGAAACTACGAGGAACTATCTGCACGAACAAAGCAGCCTTAGCAATCCTGTATGGCGAGAAGATGCCGTCGGAAAGGTGGTTGATTTAAGGTCCAGTGACTATGAAAGATCAATAACAACCGTGGCAAAAAATATCGCCACCAAACTTACCGGAACCGAAAGAGAACTCCGACCCCAAGAGTTTCAGCTCCGGCGGGCCAAAAATCAGGGGGCAGATCAATGGCATCAAGATAAAGAGCCAAAGAAG…	MTYGIRGGAGTSAYYPQPQPQPFDELKLDQGQIQEKTEKLKEKGYFTVPISETTRNYLHEQSSLSNPVWREDAVGKVVDLRSSDYERSITTVAKNIATKLTGTERELRPQEFQLRRAKNQGADQWHQDKEPKKVICIATVEGRGTEFVKRRDSEGIFRTGTYGKMVPLNADAIKRRTKEAKLDRFYFFAGKGISEDDVPKLVHRSPHESDRSIFLARWK	93	-	77658	77690	TGGAACCTTTTTCGTACTTAGCGCCACATAATG
Pseudomonas syringae	1	PatICMP2813	PatICMP2813|ALO95_00218	Cluster_4852.1	Type III secretion related protein	PatICMP2813_Contig_10	+	90960	92066	1107	368	ATGAAAATCGTCGCTCCGCCTATCATGCGAATACTTCCGGTCGCGCCGACCCGCGTCGTGACGCCTGCTGCGCAGCCACTTCCCAATGCTGATCTGCACAATTCAGGGACTTCGCCACAACAGGTTTCGCGCTTCGCGGCCGCGCTCATCCAGCACAGACGCATCCTCATTCAGCGCGACCTGATCGCCAGCAACAATGCCTTGCAGTCGCGAGCGGTGAAGCTCGGTGAGCTTTATCAACTGCTGATGACCGATCAGGACACCGGGCTGGATAACGCGGCCAGGGTATTGCGCAAAAAGCTCATGCAGGACGACTCGTCCTCAGATCTGAAGCAGGTTCTGGATTACACCGACGGTGATGCCGCCAAGGCTCATGTGGTGTTGCAAGCCGCCAGAAAA…	MKIVAPPIMRILPVAPTRVVTPAAQPLPNADLHNSGTSPQQVSRFAAALIQHRRILIQRDLIASNNALQSRAVKLGELYQLLMTDQDTGLDNAARVLRKKLMQDDSSSDLKQVLDYTDGDAAKAHVVLQAARKQAEADGEMGEHVVLTQQLKQLRRKYGPRARAGINSAKAFARPNIDNKRRVALRNLYSVAVSGQPNITGLIEALLGEQQEAGQFNIDLRDMRTAIADDLSAMTPSASHEQLRTLMHGLNTARHVTTLLKGCEHLLGRMRNKNPDLTVDPPAFLKHLLTLTANGMNVNQTLQLTQHIGGKQLKHQLAFLNGLRPMLLQLPILLWRDMKSRQTALSNLLILMAELTTQEQKQLYGGLV	27	+	90901	90933	GGGAACTGATCCGGGACCGTGACCCACTCAGCG
Pseudomonas syringae	1	PatICMP2813	PatICMP2813|ALO95_00223	Cluster_3403.1	Type III secretion related protein	PatICMP2813_Contig_10	+	96975	97550	576	191	GTGACGATGACCGCACCGATCAAAACCCCGGCCAAAGCGCCACCAGCACCCCAGCGCCCTGCGCCTGTCGAGCGGCCAGCCACAACTCTCAGTGAAAAACCATTCGGTGAAAAACGCCTTGCATCCGGTGGCCTGGGCCGTGGCGATGTACAGACCAGCCGTTCGGTACTGAGCAAGTCGCTGCAAGACACCCCGATGAGTGCCGACGGCATGTTCTTTTCGCAACTGCTGGTGCCGCCCGTAAGTGCCGAACCTGGTCAGCAAGGCTTTGGCGGGGGCGGTATAGCCTTTCCGGTACGCGCAGAACAAGTGCCGACCCAACTGATCGACGAGCTGGCGCAGCGCCTGCCGGATCAGCCTGACGGCCCCCTCAGTTTCACCCTGCTGATGCCCAGCCTG…	MTMTAPIKTPAKAPPAPQRPAPVERPATTLSEKPFGEKRLASGGLGRGDVQTSRSVLSKSLQDTPMSADGMFFSQLLVPPVSAEPGQQGFGGGGIAFPVRAEQVPTQLIDELAQRLPDQPDGPLSFTLLMPSLGSVRVNANKTENRWSVQLGFARRDVLKRLSAHTGACRDSLSQALGQDVELDMHEDLSA	6042	+	90901	90933	GGGAACTGATCCGGGACCGTGACCCACTCAGCG
Pseudomonas syringae	1	PatICMP2813	PatICMP2813|ALO95_00229	Cluster_18957.1	Type III secretion related protein	PatICMP2813_Contig_10	-	102006	102365	360	119	ATGATTGAGGTAACGGAAAAGTCGGCATTTTACGCTCAGGTTGCCGCCCAGAGCCCAGCAGTATGGCCAGTGGCCAATGGCGTCGCGTTTGTCAGTCGGCGCGAACACCATGATTGGGGGATCGCCTTGCACATAGAAGGCCGCGCGTTGCGTCCCGATCAACTGCGTGATGCACTGCAACGACGTTTTATGGAGTCAGAGCGTTTCAATCACTACTTCCTGTTTCTGGACGTACGACGCGACTTTGTGGTGTGGCACGCGGTCAACGAAAAACCGGGTTCCTACGCCAGCCTGGACGACATCCGCCGGCATGAATTGATGCTGGCAGGGCTGGACCATTTGAGCGAGGAAATGCACTGA	MIEVTEKSAFYAQVAAQSPAVWPVANGVAFVSRREHHDWGIALHIEGRALRPDQLRDALQRRFMESERFNHYFLFLDVRRDFVVWHAVNEKPGSYASLDDIRRHELMLAGLDHLSEEMH	2976	-	105341	105373	TGGAACCGCTCGGCGGGTTTGCTCCACTCAAGG
Pseudomonas syringae	1	PatICMP2813	PatICMP2813|ALO95_00232	Cluster_49085.1	Type III secretion related protein	PatICMP2813_Contig_10	-	105087	105311	225	74	ATGATCAGTTTCAACAGCTTGCAACGCCATCTCGACAACTCGGTGAGCCGTGCTCACACCAACATGGACCAGGCAGCGATGGAAGCCTCCGAGAGTGGCACCGTCGAAGACCTGCAGGCATTCAACGATGCCCAGCAGCAGGTCGATGTCGCCGGTATTGCCGTCAATGAATGCCTGCGTGCCAAGCACGGTATCAATAAAGCAGTCATCGATGGAATTCAGTGA	MISFNSLQRHLDNSVSRAHTNMDQAAMEASESGTVEDLQAFNDAQQQVDVAGIAVNECLRAKHGINKAVIDGIQ	30	-	105341	105373	TGGAACCGCTCGGCGGGTTTGCTCCACTCAAGG
Pseudomonas syringae	1	PatICMP2813	PatICMP2813|ALO95_00234	Cluster_2413.3	Type III secretion related protein	PatICMP2813_Contig_10	-	106023	106553	531	176	ATGATGAGCCTTTCTGCCGAGGATCACTGGATTCACTGGTGGTGCAACCCCTGGCAGTGGGCTCATTCGCAGTGGCATGACCGATTCGCCAACGCTCGTGGGTTATCGGTCAGTGACTGCGATGCGCTCATGGCCAGCCGTCATGGCGTGTTTCTGCAGAGTCTGGGCATTGACCCGGCTCAGCCGCCAGCGCCCGCGGAACCGGTGCTGCGCTGGTTGGCGCTGACGCCCTCGCAGCGTGAGCAGGCGCTAAGCCTGGCGCAGTGCATCTGCTTCTCCCGTAACGAAAGCGACGGCCCTGACGGTCAATGGTGCTGGGGGTTGACCAAAGCGCTGCGCCCCGGTGTCTGGCTGGAGTTTGAACATGAGGACGCGCGTCTTCTGCTGGGCGCCTGGCTT…	MMSLSAEDHWIHWWCNPWQWAHSQWHDRFANARGLSVSDCDALMASRHGVFLQSLGIDPAQPPAPAEPVLRWLALTPSQREQALSLAQCICFSRNESDGPDGQWCWGLTKALRPGVWLEFEHEDARLLLGAWLGPQYWSRLRLEWPPNEVPDTPGKAPENKLQALWQAIMWRVTAA	2768	-	109321	109353	TGGAACCGATTCGCAGGCTGCTGCCACCTAGTG
Pseudomonas syringae	1	PatICMP2813	PatICMP2813|ALO95_00236	Cluster_28714.2	Type III secretion related protein	PatICMP2813_Contig_10	-	107365	107739	375	124	GTGACCATTTCCCAACTCAGCAATTTGAAAAGTGTATCGCCGGAGCTTGGGCAGAATGCTCATCAGGGGCTCGGCTCCGAACCCGTTCAGGCGGATGTCGACCTATTCAATGCGGCGATGCGCCCTGACAGCGGGCCCGCAGCGTCGCACCTGTCCGACCGGATAGCCAGTGCGCTGTCCGAGCGGCTGGGCAGTACCGAGAAGCTTTCACAGCAAGCATTACGCCAGATGAAGAAAGTGTCGAACACCGAAGATCCTGGAGACATCGTGCAGATGAGTCGGGCGTTGTCGCAGTGCTCGTTGCAAATGGCGTTGACGACCAAGGTCGTGAGCAAGAGCGCTCAGGCGCTCGACAAGTTGACCAACCTGCAGTAG	MTISQLSNLKSVSPELGQNAHQGLGSEPVQADVDLFNAAMRPDSGPAASHLSDRIASALSERLGSTEKLSQQALRQMKKVSNTEDPGDIVQMSRALSQCSLQMALTTKVVSKSAQALDKLTNLQ	1582	-	109321	109353	TGGAACCGATTCGCAGGCTGCTGCCACCTAGTG
Pseudomonas syringae	1	PatICMP2813	PatICMP2813|ALO95_00237	Cluster_4702.2	Type III secretion related protein	PatICMP2813_Contig_10	-	107767	108879	1113	370	ATGCAAGCACTTAACAGCATCAGTTCGTTGCAAACCTCTGCATCATTGTTCCCCGTGTCGCTCAACAGCGATGTGAGCGCCAACACCAGCACTTCCAGCAAAGAGCTCAAGGCTGTGATCGATCAGCTGGTTCAGGCGCTGACCCAAAGTGGGCAGCTCGATGAAACCTCACCGCTCGGCAAAATGCTCGCCAAGGCCATGGCTGCGGATGGCAAGTCGGCTAACAGCATCGATGACATCACTGCATCGCTCGACAAGCTGATCCACGAAAAGCTCGGCGACAATTTCGGTGCCTCTGCCGGCATCGGCGCGGGTGGCGGTGGCGGTGGCATTGGCGGGGCGGGTTCTGGTTCGGGTGTCGGTGGCGGTCTGAGCAGCGACGCGGGTGCCGGGCAATCC…	MQALNSISSLQTSASLFPVSLNSDVSANTSTSSKELKAVIDQLVQALTQSGQLDETSPLGKMLAKAMAADGKSANSIDDITASLDKLIHEKLGDNFGASAGIGAGGGGGGIGGAGSGSGVGGGLSSDAGAGQSDLMSQVLNGLGKAVLDDLLTPSGEGGTTFSSDDMPTLEKVAQFMDDNKAQFPTRDGGSWMNELKEDNGLDAQETAQFRSALDVIGQQLGQQQGDASGVTSGGGLGSPVSDTSLGNPAIDANTGPAANGNASVDVGQLIGQLIDRGLQSVSSGGGLGTPVDNSTQPAGGTPAANPTGNVSNQDLGQLLSGLLQRGLEATLQDAGNTGADLQSSAAQVAAQLINALLQGTNNQTNQAVA	442	-	109321	109353	TGGAACCGATTCGCAGGCTGCTGCCACCTAGTG
Pseudomonas syringae	1	PatICMP2813	PatICMP2813|ALO95_00245	Cluster_3390.2	Type III secretion related protein	PatICMP2813_Contig_10	-	122008	122502	495	164	ATGACCAACAATGACCAGTACCACACCCTTATCAACGAAATCTGCGCACTCAGCCTGATTTCCACACCTGAACGTTTCTATGAATCTGCCAATTTCAAAATCAGCGAAGTGGACTTCACCCTGCAGTTTCAGGACCGCGACGAAGGCCGTGCCGTTCTGATCTACGGTGACATGGGCGCGTTGCCCGCGCGCGGCCGTGAGAGCGCGTTGCTGGCGTTGATGGACATCAACTTTCACATGTTCGCGGGCGCCCACAGCCCGGCATTTTCCTTTAATGCGCAGACCGGTCGTGTGCTGCTGATGGGCTCTGTGGCCCTTGAACGAGCCTCTGCCGAAGGCGTGCTGTTGTTGATGAAGTCGTTTTCCGACCTGGCCAAAGAGTGGCGCGAGCATGGATTC…	MTNNDQYHTLINEICALSLISTPERFYESANFKISEVDFTLQFQDRDEGRAVLIYGDMGALPARGRESALLALMDINFHMFAGAHSPAFSFNAQTGRVLLMGSVALERASAEGVLLLMKSFSDLAKEWREHGFMGQATTVGASTDQPVAPAAKRESLSAPGRFQ	57	-	122559	122591	AGGAACTGAAATGCCTATGCCTGCGACTCAGTG
Pseudomonas syringae	1	PatICMP2813	PatICMP2813|ALO95_00246	Cluster_4528.1	Type III secretion related protein	PatICMP2813_Contig_10	+	122808	124085	1278	425	ATGAGCATCGGCATCACACCCCGGCCGCAACAGACCACCACGCCACTCGATTTTTCGGCGCTAAGCGGCAAGAGTCCTCAACCAAACACGTTCGGCGAGCAGAACACTCAGCAAGCGATCGACCCGAGTGCACTGTTGTTCGGCAGCGACACACAGAAAGACGTCAACTTCGGCACGCCCGACAGCACCGTCCAGAATCCGCAGGACGCCAGCAAGCCCAACGACAGCCAGTCCAACATCGCTAAATTGATCAGTGCATTGATCATGTCGTTGCTGCAGATGCTCACCAACTCCAATAAAAAGCAGGATGCCAATCAGGAGCAGCCTGATAGCCAGGCTCCTTTCCAGAACAACGGCGGGCTCGGTACACCGTCGGCCGATAGCGGGGGCGGCGGTACA…	MSIGITPRPQQTTTPLDFSALSGKSPQPNTFGEQNTQQAIDPSALLFGSDTQKDVNFGTPDSTVQNPQDASKPNDSQSNIAKLISALIMSLLQMLTNSNKKQDANQEQPDSQAPFQNNGGLGTPSADSGGGGTPDATGGGGGGDTPSATGGGGGDTPTATGGGGSGGGGTPTATGGGGGGTPTATGGGEGGVTPQITPQLANPNRTSGTGSVSDTAGSTEQAGKINVVKDTIKVGAGEVFDGHGATFTADKSMGNGDQGENQKPMFELAEGATLKNVNLGENEVDGIHVKAKNAQEVTIDNVHAQNVGEDLITVKGEGGAAVTNLNIKNSSAKGADDKVVQLNANTHLKIDNFKADDFGTMVRTNGGKQFDDMSIELNGIDANHGKFALVKSDSDDLKL…	122	+	122656	122686	GGGAACCGGTCGCTGCGCTTTGCCACTCACT
Pseudomonas syringae	1	PatICMP2813	PatICMP2813|ALO95_01295	Cluster_9017.1	Type III Effector	PatICMP2813_Contig_21	-	12956	13633	678	225	ATGATCAATAGCATCCGTGGCGGAGCGGGCACATCGGCCTATCACATCCAGCCCCAGCCATTTGATGAGTTGAAACTGAAGCCTGAAGTCATTGAGAAAAAGACGGAAAGACTCAAGGATAAGGGATATTTCAGCGTTCGTATGTCGGAGCCTACGAAAAGCTATTTGCATCAGCGAAGCACGCTCAGCAATCCCGCATGGCGAAACCAGACCGTAGGACAAGTCATCGACTTGACGGGAACGGACTATGAGCGCTCGGTCACGGCAGTGGCAAAAGACATTGCAACGAGACTTACCGGGAAACAGGAACAACTGAAACCACAAGAATTTCAGCTGCGGCGGGCCAAAAATCAGGGGGCGGATAAATGGCACCAGGATAAGGAGCCGAAAAAGGTCATC…	MINSIRGGAGTSAYHIQPQPFDELKLKPEVIEKKTERLKDKGYFSVRMSEPTKSYLHQRSTLSNPAWRNQTVGQVIDLTGTDYERSVTAVAKDIATRLTGKQEQLKPQEFQLRRAKNQGADKWHQDKEPKKVICIATVEGRGTEFIKPSESKKLFETGEYAEMIPKNAEADAQKTAEAIAKKTNEAKKDRFYFFAGKGITEESIPKLVHRSPHESGRAIFMARWK	91	-	13724	13756	CGGAACCGCTCTTCAACTGGTTGCCACCAAGGC
Pseudomonas syringae	1	PatICMP2813	PatICMP2813|ALO95_03111	Cluster_3432.1	Type III Effector	PatICMP2813_Contig_53	-	51616	52518	903	300	ATGAAAATATCCGGCTCCACATCGCCTGCACACACTTCAACGAATTCCGCGCAGAAGTCCTCTTCAAAAGGGCTGCTGAGTGGTTTGGCCAAGCATTTCAAGGGGATGCTCGTTTCTGGCAACACTTCTGGTCATTCGGCGCTCGGGCATTACGCGTCATCCAGCAGCGGCTCCAAAGGCAAGGCACCGGTACGGGACGATTACAGCAACGGACCGCAAACACGCCTTAACAACACACCTCTGAAACGAGCACTGGCCCGAGAGCTTGATCGCTTTGGCTACGGTTCATCGGCGACCGAGTCTTTTGACCGCTCATTGCAGCGTAAGGATAAAAATCCAGAGCTTGGTCACCTTGATGACGACGAGTACCTCGCTTTGCGCATGTACACAACGCCGTTT…	MKISGSTSPAHTSTNSAQKSSSKGLLSGLAKHFKGMLVSGNTSGHSALGHYASSSSGSKGKAPVRDDYSNGPQTRLNNTPLKRALARELDRFGYGSSATESFDRSLQRKDKNPELGHLDDDEYLALRMYTTPFYRAVNHQLRDGKPSEDMKVVVEAMNKGLKRLAEHPDNVVKETLYRGINKVVDDKFIHKNFKLGEVYRDKTFVSATPDLSTVNATFTRHTVKSSKAKASAPVYQRSPLLEIESRSAVRVRQVSLSSAEEEGIFAPDTPFLVADKSRTDSGRWHIKLKEIDESDESSGL	516	-	53034	53065	TGGAACCGGACGAGGCTTTTTACCACTCAATG
Pseudomonas syringae	1	PatICMP2813	PatICMP2813|ALO95_03673	Cluster_4422.1	Type III secretion related protein	PatICMP2813_Contig_63	+	119657	120631	975	324	ATGACCATGGGTGTTTCACCTATTCGTAACTCAAACTCCCTACCGATCGATTTTTCGTCGTTGAGCGCAAAGAGTGGCGGGCATAACGGGCTGGGCAGCGGAGACAATTCGACTATCGACCCGAGTACGTTGTTGTTCGGCAATCAAGGGCAGACGCAGGTCAATTTCGCTCCGCCCAACAGCACGGACTCCTCAACCAGCGGTGTGAACGCTGCGTCAGGTAATACGGCGTCCGGCCTGGTCGAGCAAATCATGAGCCTGCTGAAACAATTGATGCAGATGCTGATGCAAAACAACAATGCTTCCAGTAACCCTCAGACTGATTCGTCAACGCCAGGCGTCGGCAGTGGCAACAGCGTCGGGAGCGGCGGTACTGGAAGCAGTCTCGCAGGCAGTGAC…	MTMGVSPIRNSNSLPIDFSSLSAKSGGHNGLGSGDNSTIDPSTLLFGNQGQTQVNFAPPNSTDSSTSGVNAASGNTASGLVEQIMSLLKQLMQMLMQNNNASSNPQTDSSTPGVGSGNSVGSGGTGSSLAGSDGGDETSGVGNGGLGDAGSTPTTSAADGVPSDTSLTGSGGLHLPQQLEQYRGDIMDAAKATGVPPSVIAGQIWAESRGQLNAATTNVNGKADAGLMQVNADTFKSLQQQNPGLLGNDVNDSHTNIMAGALYLRDQNKEFGDMGAALRAYNSGPDKVNKADLSDTGGVGGSSYPADVLNFAKIIESGQGNLPA	89	+	119537	119568	GGGAACCGAGTCACTCAGTGAACCACTCAGTT
Pseudomonas syringae	1	PatICMP2813	PatICMP2813|ALO95_03782	Cluster_6364.1	Type III Effector	PatICMP2813_Contig_66	+	32389	33531	1143	380	ATGAACCCCATTCAGTCACGCTTCTCCAGTGTGCAAGAGCTCAGACGATCCAACGTTGATATTCCGGCGCTCAAAGCCAATGGCCAACTGGAGGTCGACGGCAAGAGGTACGAGATTCGTGCAGCCGATGACGGAACAATTTCGGTCCTTCGACCGGAGCAACAGTCCAAGGCGAAAAGTTTTTTCAAGGGCGCTTCTCAGTTGATAGGTGGCAGCAGCCAGCGCGCGCAGATTGCCCAGGCGCTCAACGAGAAAGTCGTATCGGCACGCACTGTATTGCACCAGGGCGCTGTGACGGGCGGACGCTTGGACACCCTTGAGCGGGGCGAAAGCAGCTCAGCCACAACAGCCATCAAACCCACTGCCAAACAGGCTGCGCAAAGTACTTTTAACAGCTTT…	MNPIQSRFSSVQELRRSNVDIPALKANGQLEVDGKRYEIRAADDGTISVLRPEQQSKAKSFFKGASQLIGGSSQRAQIAQALNEKVVSARTVLHQGAVTGGRLDTLERGESSSATTAIKPTAKQAAQSTFNSFHEWAKQAEAMRNPSRMDIYKIYKQDAPHSHPMSDEQQEEFLHTLKALNGKNGIEVRTQDHDSVRNKKDRNLDKYIAESPNAKRFFYRIIPKHERREDEHQGRLTIGVQPEYAAQLTRAMATLIGKESAITHGKVIGPACHGQMTDSAVLYINGDVAKAEKLGEKLKQMSGIPLDAFVEHTPLSMQSLSKGLSYAESILGDTRGHGMSRAEVISDALRMDGMPFLARLKLSLSANGYDPDNPALRNTK	455	+	31902	31934	TGGAACCGCCTCGAGCAGAGGCTCCACTCATTG
Pseudomonas syringae	1	PatICMP2813	PatICMP2813|ALO95_05062	Cluster_452.1	Type III Effector	PatICMP2813_Contig_41	-	55287	61160	5874	1957	ATGGTCAAGGTTACCTCTTCCGGATTTACTGCCAACCCACTCTCTCATCATGCGGACAGTGTTTCCCCCGCGAACAGTCCCCCTCAGTTACCGGAGCCTGTGCCTCTGGTTGATCTAAGCGAGTCGTCCCGCAAGGGCGGCATGCGAAATCGGCCGCATGCCAGTTTGAACAGTCAGGTGCTCGGACTGCAAGCGGTGCCGTCGCAACGTGGAATGCATGTTCGTGTCAGAAGTCATGCCGATGGCGAGAGTGTCATTAATGCCTGGCTGGCAAAGCGCCCCTCGGTTCAAAGCGAAACCAGTCTTGATAACGATGGCAAGCTGGTGCGTTACACCCCCGTGAATCATGAGCCGCTGGCCCCGCGCAATGAGGCGTTTTTCACCTCTGTGCCGGGGATG…	MVKVTSSGFTANPLSHHADSVSPANSPPQLPEPVPLVDLSESSRKGGMRNRPHASLNSQVLGLQAVPSQRGMHVRVRSHADGESVINAWLAKRPSVQSETSLDNDGKLVRYTPVNHEPLAPRNEAFFTSVPGMLMAVLTVHPEMEHGISGDITADAVAARLAEPPIGLLTGIWQSSHDRAYLERGGVVHTANMEERWAPLTLPGINPREPLRMAGLQADGGVYLHNGSQLWRLTETAAESVTTENLPEGAAVRIGAGGEVHGLHEGALHSNGISRPIELWRPKAGAPGREQSPARPVDLLPLPGGTAALILDDKGRIYHADLKGTGAVEAHRLKLPADFAQGKGWAVTAMGLSRDDTVHLMLQDQNGRRMSLQRAPGEALFRPAYLLDRPLLLLYTEGL…	173	-	61333	61364	CGGAACCGATCCGGTTGCCTGGCCACTCAATT
Pseudomonas syringae	1	PatICMP2813	PatICMP2813|ALO95_05488	Cluster_406.1	Type III Effector	PatICMP2813_Contig_84	-	3928	8052	4125	1374	CTGAGCCGATGGAGCCCGCTCATGACCTTAAGAATCAATACTCGTTCTGCTACCCCGGTTGTACCTCTGGAAACAGGCTCTTCGTCGCAGCCGGCACCGCCGCCTGTCACGGCAAGAGCGACTGAGCCTCCCCCCGTCGCCAATCCTGCGGCGCCTAAATCAGCGCCAGGTGTTCAGCAAGCACACGGGCTGAAGACGCGCATCGCTGGCAAACTTTCCGAACGTCAGACCAATTTCAGTCTTGGTATTCCCGGCACCGGTCGTACTCTCAACCGGCCCCTGCGCAGCGGGATTCCGGAGGAAGGTGAGCAGGTATCGAACGAGGAGAGTCATGATCCGTTGCTCAAGGAAGCGCATGAACTGCAGCGCATGGTGGAGTCGGCGCTGACCCATCTGAAG…	MSRWSPLMTLRINTRSATPVVPLETGSSSQPAPPPVTARATEPPPVANPAAPKSAPGVQQAHGLKTRIAGKLSERQTNFSLGIPGTGRTLNRPLRSGIPEEGEQVSNEESHDPLLKEAHELQRMVESALTHLKAAPTSLWERPAPSTVRRITTKVFPWLKPAPLREVASNGSNAKTKIKIKINSQQSPETIAAAVKELSTRLDHQSKVLATATHALVAAREHLESLEQATPPSSTERLDHARARVQQADSTTRLASQQLRELIQGTEVLQLGALSEGQDQVEQKAEFSQQWLSELRTRMQAVDVRFADRHAAIEIELQLKVAQTRELISLDHDMTAAEHTAAQANTQLSALRAQRQETPEGSDEADRLDTAIGQTLAARSQAMQTHQQLAKKLVRVDAD…	261	-	8313	8344	CGGAACCGAATCCATATTTCGACCACCCATCC
Pseudomonas syringae	1	PatICMP2813	PatICMP2813|ALO95_100682	Cluster_828.1	Type III Effector	PatICMP2813_Contig_53	-	60167	62935	2769	922	ATGATGCCATCTCAGATCACGCGCTCCTCTCATTCATCCTCGCCGGATGCCTCTCAACCGGCTTGCGATGCTGCAAGTAGCCTCGAGCAATCGCCGCAGCAGGTCCGCACCCGGGCGTTTGTCGCCAAAGGCAAACTGTCTGAGGCATTCGGGCGCACGTCTACTGCGCCGGCGCAGGATGCGGTGCACCTGCTGAACAATCTTCAGCGCGAGCTGGCGAAAGAGAATCCGTCTGGTCCCGAGCTTGCCCTGCTGGGCAAAGAGCTCGCCGCTGCCGCGATGACCGAGCAGGGCTCGCATCTGCTGGCCACCGAAGAACACCAGCACGTGTTGAAAGACGTGCTTGATCGTTGCATGCGCCAGTTGGCGGATACGCCTGCGTCTAATGCGTCCCATGTA…	MMPSQITRSSHSSSPDASQPACDAASSLEQSPQQVRTRAFVAKGKLSEAFGRTSTAPAQDAVHLLNNLQRELAKENPSGPELALLGKELAAAAMTEQGSHLLATEEHQHVLKDVLDRCMRQLADTPASNASHVPLSQACEGLKTARLHQSLAMLTGTSHTQTRGVADLLALTQLDPKVLAEKLDGQAPYESFGHFIRTARDSTAALNVSLSDPAGETTGLLRAQADTLEALEKLPAILAALIEHCPDMPTQKDLRSLKDAAGELLTKLRESALLKGSEEIVSEAGESPVHGRESVEPALTRSQALLKAGGKLVRKFDAYGAVAPMDDKKLLALLRTPAPHLSPAQMHAFLNRYAIQLTDEQRTIVSNTALPPASEGDIEAQGGMGFDEKLRLALADGSL…	44	-	62979	63010	GGGAACCGTTCCGGATCGAGCGCCACTTAGCC
Pseudomonas syringae	1	PatICMP2813	PatICMP2813|ALO95_100767	Cluster_2594.1	Type III Effector	PatICMP2813_Contig_41	+	83716	84372	657	218	ATGATCACTCCGTCTCGATATCCAGGCATCTATATCGCCCCCCTCAGTAACGAACCGACAGCAGCTCACACATTCAAAGAACAACCAGAGGAGGCACTTGACCATATCAGCGCCGGCCCCTCGGGCGATAAGCTATTGCGAAAAATATCCACTCTTGCCAGTCAAAAAGATAGAAAAGTCACGCTAAAAGAGATTGAAATAAATAACCAGTGTTATACCGAAGCTGTTCTGAGCAGGAGGCAGCTTGAAAAGTACGAACCAGAAAACTTTAACGAGAATCGGCACATTGCATCACGGCTATCACGAAAGGGGGCCTTTACCAAAGGTGAGGGAAGCAATGCGATTATTGGCTGGTCACCAGACAAAGCAAGCATACGCTTAAATCAGAATGGCTCACCG…	MITPSRYPGIYIAPLSNEPTAAHTFKEQPEEALDHISAGPSGDKLLRKISTLASQKDRKVTLKEIEINNQCYTEAVLSRRQLEKYEPENFNENRHIASRLSRKGAFTKGEGSNAIIGWSPDKASIRLNQNGSPLHLGMDNDDKITTLAHELVHARHVLGGSSLADGGDRYNPRTGSGKEELRAVGLDKYRYSLTKKPSENSIRAEHGLPLRMKYRPHQ	1491	+	82194	82225	GGGAACTGAACCGCTTATGAAACCACTCATTT
Pseudomonas syringae	1	PatICMP2813	PatICMP2813|ALO95_100980	Cluster_7521.1	Type III Effector	PatICMP2813_Contig_34	-	27930	28739	810	269	ATGACAAACGTCTCTGGACACATTGGAAAATACCCGAGCCTCGCTAACGTTCAGGCTGGGTCTTCGGCGTCGGTCGAAAACCAGATGCCTGATCCTGCTCAGCACAGCGATGGTCGGTGGAAACAGCTTCCGACTCAGCTATCGTCTATTGCATTGTCGAGATTTGATCAAGGTATTTGCACGAATAATCACGGCATAAGCCAGCGTGCAATGTGCTTTGGCCTTTCGTTGAGCTGGATCAATATGATTCATGCAGGGAAAGACCATGCAACACCCTATGCGTCGGCAGAAAGAATGAGATTTTTGGGGTCATTCGAGGGTGTGGTGCACGCTCGTACTATTCATAACTTTTATCGAACTGAACATAAGTTTCTGTTGGAGCACTCGTCCTCAAATCCC…	MTNVSGHIGKYPSLANVQAGSSASVENQMPDPAQHSDGRWKQLPTQLSSIALSRFDQGICTNNHGISQRAMCFGLSLSWINMIHAGKDHATPYASAERMRFLGSFEGVVHARTIHNFYRTEHKFLLEHSSSNPGVSTGAMAGTESLLQAAEIKGLKLRPVLEDKSNSGLPFLIACKQSGRQIVTDEAALNSLCEAIVENRKGVLVIYSEEIAHALGFSVSPDGKSATLFDPNLGEFHTHSKALADTIENISSADGLTLVGVQIFASKMR	29	-	28768	28799	GGGAACCGATTCGCTTCTAAAACCACTCAATC
Pseudomonas syringae	1	PatICMP2813	PatICMP2813|ALO95_101215	Cluster_23272.1	NA	PatICMP2813_Contig_10	+	84399	84680	282	93	ATGGACGCCCTCAACCCTTTTGCATGGCAAGCACTTAATTGCCATTCACAACCGATCAAGGTGCCCAAGATGAAAAAAACCAAACTGCTCAACCGCGCTATCTGCATTGCCTTTTTTCCGCTGGCAGCATTGGCTGGCAACGCCTTCGCGGACTCAGGCTCGGCCTCAGCAGGAACTGGTAGTTCGCAGAGTGCAGCGGATCAGCGTGCAGCCATGGAGGCTGCTGCAGAGGCCGCCAAGCGATGCGGATTCGTTTTCGGACAAGGCCATGTCTGCGATTGA	MDALNPFAWQALNCHSQPIKVPKMKKTKLLNRAICIAFFPLAALAGNAFADSGSASAGTGSSQSAADQRAAMEAAAEAAKRCGFVFGQGHVCD	25	+	84342	84374	TGGAACCGGATGCTCTGCAAGGGCCACACATGC
Pseudomonas syringae	1	PatICMP4303	PatICMP4303|ALO88_00393	Cluster_6364.1	Type III Effector	PatICMP4303_Contig_107	+	32419	33561	1143	380	ATGAACCCCATTCAGTCACGCTTCTCCAGTGTGCAAGAGCTCAGACGATCCAACGTTGATATTCCGGCGCTCAAAGCCAATGGCCAACTGGAGGTCGACGGCAAGAGGTACGAGATTCGTGCAGCCGATGACGGAACAATTTCGGTCCTTCGACCGGAGCAACAGTCCAAGGCGAAAAGTTTTTTCAAGGGCGCTTCTCAGTTGATAGGTGGCAGCAGCCAGCGCGCGCAGATTGCCCAGGCGCTCAACGAGAAAGTCGTATCGGCACGCACTGTATTGCACCAGGGCGCTGTGACGGGCGGACGCTTGGACACCCTTGAGCGGGGCGAAAGCAGCTCAGCCACAACAGCCATCAAACCCACTGCCAAACAGGCTGCGCAAAGTACTTTTAACAGCTTT…	MNPIQSRFSSVQELRRSNVDIPALKANGQLEVDGKRYEIRAADDGTISVLRPEQQSKAKSFFKGASQLIGGSSQRAQIAQALNEKVVSARTVLHQGAVTGGRLDTLERGESSSATTAIKPTAKQAAQSTFNSFHEWAKQAEAMRNPSRMDIYKIYKQDAPHSHPMSDEQQEEFLHTLKALNGKNGIEVRTQDHDSVRNKKDRNLDKYIAESPNAKRFFYRIIPKHERREDEHQGRLTIGVQPEYAAQLTRAMATLIGKESAITHGKVIGPACHGQMTDSAVLYINGDVAKAEKLGEKLKQMSGIPLDAFVEHTPLSMQSLSKGLSYAESILGDTRGHGMSRAEVISDALRMDGMPFLARLKLSLSANGYDPDNPALRNTK	455	+	31932	31964	TGGAACCGCCTCGAGCAGAGGCTCCACTCATTG
Pseudomonas syringae	1	PatICMP4303	PatICMP4303|ALO88_01168	Cluster_3403.1	Type III secretion related protein	PatICMP4303_Contig_21	-	4277	4852	576	191	GTGACGATGACCGCACCGATCAAAACCCCGGCCAAAGCGCCACCAGCACCCCAGCGCCCTGCGCCTGTCGAGCGGCCAGCCACAACTCTCAGTGAAAAACCATTCGGTGAAAAACGCCTTGCATCCGGTGGCCTGGGCCGTGGCGATGTACAGACCAGCCGTTCGGTACTGAGCAAGTCGCTGCAAGACACCCCGATGAGTGCCGACGGCATGTTCTTTTCGCAACTGCTGGTGCCGCCCGTAAGTGCCGAACCTGGTCAGCAAGGCTTTGGCGGGGGCGGTATAGCCTTTCCGGTACGCGCAGAACAAGTGCCGACCCAACTGATCGACGAGCTGGCGCAGCGCCTGCCGGATCAGCCTGACGGCCCCCTCAGTTTCACCCTGCTGATGCCCAGCCTG…	MTMTAPIKTPAKAPPAPQRPAPVERPATTLSEKPFGEKRLASGGLGRGDVQTSRSVLSKSLQDTPMSADGMFFSQLLVPPVSAEPGQQGFGGGGIAFPVRAEQVPTQLIDELAQRLPDQPDGPLSFTLLMPSLGSVRVNANKTENRWSVQLGFARRDVLKRLSAHTGACRDSLSQALGQDVELDMHEDLSA	6042	-	10894	10926	GGGAACTGATCCGGGACCGTGACCCACTCAGCG
Pseudomonas syringae	1	PatICMP4303	PatICMP4303|ALO88_01174	Cluster_477.1	Type III Effector	PatICMP4303_Contig_21	+	11752	14094	2343	780	ATGCGTATATCCAGTTCTCCCTTCGTTATCGTGAACCAACCCACTCCTGGCGAACTGGCTCTGGCTGTTGAGTCGCCTCTTGCCAAAGCCTTGCCGACACCTGCGGGTGGCGGTGGGCAAGCCGGCGTGCAGTTCGGTCAGCCGGCCGGCAACACGCAAGGCGCGCCGACAGGAGCCGAGCAGACCGCGTCGTCTATCCTGGCTCTTTTGCTCCAGGGCAGTGGCGGGGCAGCTGCCAATGCCAATGTGAATAATCAGGTCCAGCCGCAACCCTGCGCAGATTCTCCTGCCGAGGCTGCACCGACTGAAGCGACTGCCCCGGCCGCTCCGGTTGAACAGGTCGCAGCTCCCACGAACACAGATGCAACCGACGCTTCCAACGCCCCAAAAGCCGCAGAC…	MRISSSPFVIVNQPTPGELALAVESPLAKALPTPAGGGGQAGVQFGQPAGNTQGAPTGAEQTASSILALLLQGSGGAAANANVNNQVQPQPCADSPAEAAPTEATAPAAPVEQVAAPTNTDATDASNAPKAADAAFLDNSEYSSPEALKRWEPMVAHLPPEEREQAAKELNRPIAAAWMARDDGPDAGKAMDFINANPALKTAVDVAQGGGNADGKITNKDLKTFAKNMEKAADSADKDLANYTKDNPDADPQSLEMVRSAAVMRANMPLAIAADPHHAVDAADKTKVDVNVDAEDLKGLAQSNPGLSGALKQSCSTWSQPGFLGQVDEAGMSGRKKAAHSPDKMFDAKNLSEWIKKSAPTNGGQFASMLSDSATLNAVAGIDISKLDKDVFDKPKSYS…	32	+	11689	11720	TGGAACCAACTTGCACCTTCAACCACACAGTT
Pseudomonas syringae	1	PatICMP4303	PatICMP4303|ALO88_01284	Cluster_3432.1	Type III Effector	PatICMP4303_Contig_22	-	66759	67661	903	300	ATGAAAATATCCGGCTCCACATCGCCTGCACACACTTCAACGAATTCCGCGCAGAAGTCCTCTTCAAAAGGGCTGCTGAGTGGTTTGGCCAAGCATTTCAAGGGGATGCTCGTTTCTGGCAACACTTCTGGTCATTCGGCGCTCGGGCATTACGCGTCATCCAGCAGCGGCTCCAAAGGCAAGGCACCGGTACGGGACGATTACAGCAACGGACCGCAAACACGCCTTAACAACACACCTCTGAAACGAGCACTGGCCCGAGAGCTTGATCGCTTTGGCTACGGTTCATCGGCGACCGAGTCTTTTGACCGCTCATTGCAGCGTAAGGATAAAAATCCAGAGCTTGGTCACCTTGATGACGACGAGTACCTCGCTTTGCGCATGTACACAACGCCGTTT…	MKISGSTSPAHTSTNSAQKSSSKGLLSGLAKHFKGMLVSGNTSGHSALGHYASSSSGSKGKAPVRDDYSNGPQTRLNNTPLKRALARELDRFGYGSSATESFDRSLQRKDKNPELGHLDDDEYLALRMYTTPFYRAVNHQLRDGKPSEDMKVVVEAMNKGLKRLAEHPDNVVKETLYRGINKVVDDKFIHKNFKLGEVYRDKTFVSATPDLSTVNATFTRHTVKSSKAKASAPVYQRSPLLEIESRSAVRVRQVSLSSAEEEGIFAPDTPFLVADKSRTDSGRWHIKLKEIDESDESSGL	516	-	68177	68208	TGGAACCGGACGAGGCTTTTTACCACTCAATG
Pseudomonas syringae	1	PatICMP4303	PatICMP4303|ALO88_01521	Cluster_4528.1	Type III secretion related protein	PatICMP4303_Contig_26	-	97131	98408	1278	425	ATGAGCATCGGCATCACACCCCGGCCGCAACAGACCACCACGCCACTCGATTTTTCGGCGCTAAGCGGCAAGAGTCCTCAACCAAACACGTTCGGCGAGCAGAACACTCAGCAAGCGATCGACCCGAGTGCACTGTTGTTCGGCAGCGACACACAGAAAGACGTCAACTTCGGCACGCCCGACAGCACCGTCCAGAATCCGCAGGACGCCAGCAAGCCCAACGACAGCCAGTCCAACATCGCTAAATTGATCAGTGCATTGATCATGTCGTTGCTGCAGATGCTCACCAACTCCAATAAAAAGCAGGATGCCAATCAGGAGCAGCCTGATAGCCAGGCTCCTTTCCAGAACAACGGCGGGCTCGGTACACCGTCGGCCGATAGCGGGGGCGGCGGTACA…	MSIGITPRPQQTTTPLDFSALSGKSPQPNTFGEQNTQQAIDPSALLFGSDTQKDVNFGTPDSTVQNPQDASKPNDSQSNIAKLISALIMSLLQMLTNSNKKQDANQEQPDSQAPFQNNGGLGTPSADSGGGGTPDATGGGGGGDTPSATGGGGGDTPTATGGGGSGGGGTPTATGGGGGGTPTATGGGEGGVTPQITPQLANPNRTSGTGSVSDTAGSTEQAGKINVVKDTIKVGAGEVFDGHGATFTADKSMGNGDQGENQKPMFELAEGATLKNVNLGENEVDGIHVKAKNAQEVTIDNVHAQNVGEDLITVKGEGGAAVTNLNIKNSSAKGADDKVVQLNANTHLKIDNFKADDFGTMVRTNGGKQFDDMSIELNGIDANHGKFALVKSDSDDLKL…	122	-	98530	98560	GGGAACCGGTCGCTGCGCTTTGCCACTCACT
Pseudomonas syringae	1	PatICMP4303	PatICMP4303|ALO88_01529	Cluster_4702.2	Type III secretion related protein	PatICMP4303_Contig_26	+	112337	113449	1113	370	ATGCAAGCACTTAACAGCATCAGTTCGTTGCAAACCTCTGCATCATTGTTCCCCGTGTCGCTCAACAGCGATGTGAGCGCCAACACCAGCACTTCCAGCAAAGAGCTCAAGGCTGTGATCGATCAGCTGGTTCAGGCGCTGACCCAAAGTGGGCAGCTCGATGAAACCTCACCGCTCGGCAAAATGCTCGCCAAGGCCATGGCTGCGGATGGCAAGTCGGCTAACAGCATCGATGACATCACTGCATCGCTCGACAAGCTGATCCACGAAAAGCTCGGCGACAATTTCGGTGCCTCTGCCGGCATCGGCGCGGTTGGCGGTGGCGGTGGCATTGGCGGGGCGGGTTCTGGTTCGGGTGTCGGTGGCGGTCTGAGCAGCGACGCGGGTGCCGGGCAATCC…	MQALNSISSLQTSASLFPVSLNSDVSANTSTSSKELKAVIDQLVQALTQSGQLDETSPLGKMLAKAMAADGKSANSIDDITASLDKLIHEKLGDNFGASAGIGAVGGGGGIGGAGSGSGVGGGLSSDAGAGQSDLMSQVLNGLGKAVLDDLLTPSGEGGTTFSSDDMPTLEKVAQFMDDNKAQFPTRDGGSWMNELKEDNGLDAQETAQFRSALDVIGQQLGQQQGDASGVTSGGGLGSPVSDTSLGNPAIDANTGPAANGNASVDVGQLIGQLIDRGLQSVSSGGGLGTPVDNSTQPAGGTPAANPTGNVSNQDLGQLLSGLLQRGLEATLQDAGNTGADLQSSAAQVAAQLINALLQGTNNQTNQAVA	442	+	111863	111895	TGGAACCGATTCGCAGGCTGCTGCCACCTAGTG
Pseudomonas syringae	1	PatICMP4303	PatICMP4303|ALO88_01530	Cluster_28714.2	Type III secretion related protein	PatICMP4303_Contig_26	+	113477	113851	375	124	GTGACCATTTCCCAACTCAGCAATTTGAAAAGTGTATCGCCGGAGCTTGGGCAGAATGCTCATCAGGGGCTCGGCTCCGAACCCGTTCAGGCGGATGTCGACCTATTCAATGCGGCGATGCGCCCTGACAGCGGGCCCGCAGCGTCGCACCTGTCCGACCGGATAGCCAGTGCGCTGTCCGAGCGGCTGGGCAGTACCGAGAAGCTTTCACAGCAAGCATTACGCCAGATGAAGAAAGTGTCGAACACCGAAGATCCTGGAGACATCGTGCAGATGAGTCGGGCGTTGTCGCAGTGCTCGTTGCAAATGGCGTTGACGACCAAGGTCGTGAGCAAGAGCGCTCAGGCGCTCGACAAGTTGACCAACCTGCAGTAG	MTISQLSNLKSVSPELGQNAHQGLGSEPVQADVDLFNAAMRPDSGPAASHLSDRIASALSERLGSTEKLSQQALRQMKKVSNTEDPGDIVQMSRALSQCSLQMALTTKVVSKSAQALDKLTNLQ	1582	+	111863	111895	TGGAACCGATTCGCAGGCTGCTGCCACCTAGTG
Pseudomonas syringae	1	PatICMP4303	PatICMP4303|ALO88_01533	Cluster_49085.1	Type III secretion related protein	PatICMP4303_Contig_26	+	115905	116129	225	74	ATGATCAGTTTCAACAGCTTGCAACGCCATCTCGACAACTCGGTGAGCCGTGCTCACACCAACATGGACCAGGCAGCGATGGAAGCCTCCGAGAGTGGCACCGTCGAAGACCTGCAGGCATTCAACGATGCCCAGCAGCAGGTCGATGTCGCCGGTATTGCCGTCAATGAATGCCTGCGTGCCAAGCACGGTATCAATAAAGCAGTCATCGATGGAATTCAGTGA	MISFNSLQRHLDNSVSRAHTNMDQAAMEASESGTVEDLQAFNDAQQQVDVAGIAVNECLRAKHGINKAVIDGIQ	30	+	115843	115875	TGGAACCGCTCGGCGGGTTTGCTCCACTCAAGG
Pseudomonas syringae	1	PatICMP4303	PatICMP4303|ALO88_01935	Cluster_9017.1	Type III Effector	PatICMP4303_Contig_33	-	12957	13634	678	225	ATGATCAATAGCATCCGTGGCGGAGCGGGCACATCGGCCTATCACATCCAGCCCCAGCCATTTGATGAGTTGAAACTGAAGCCTGAAGTCATTGAGAAAAAGACGGAAAGACTCAAGGATAAGGGATATTTCAGCGTTCGTATGTCGGAGCCTACGAAAAGCTATTTGCATCAGCGAAGCACGCTCAGCAATCCCGCATGGCGAAACCAGACCGTAGGACAAGTCATCGACTTGACGGGAACGGACTATGAGCGCTCGGTCACGGCAGTGGCAAAAGACATTGCAACGAGACTTACCGGGAAACAGGAACAACTGAAACCACAAGAATTTCAGCTGCGGCGGGCCAAAAATCAGGGGGCGGATAAATGGCACCAGGATAAGGAGCCGAAAAAGGTCATC…	MINSIRGGAGTSAYHIQPQPFDELKLKPEVIEKKTERLKDKGYFSVRMSEPTKSYLHQRSTLSNPAWRNQTVGQVIDLTGTDYERSVTAVAKDIATRLTGKQEQLKPQEFQLRRAKNQGADKWHQDKEPKKVICIATVEGRGTEFIKPSESKKLFETGEYAEMIPKNAEADAQKTAEAIAKKTNEAKKDRFYFFAGKGITEESIPKLVHRSPHESGRAIFMARWK	91	-	13725	13757	CGGAACCGCTCTTCAACTGGTTGCCACCAAGGC
Pseudomonas syringae	1	PatICMP4303	PatICMP4303|ALO88_03980	Cluster_2333.2	Type III Effector	PatICMP4303_Contig_80	-	57133	57996	864	287	ATGAACATTACGCCGCTCACGTCAGCCGCGGGCAAGGGCTCGTCCGCACAAGGCACAGACAAAATTTCCATTCCCAACTCCACGCGCATGATCAATGCCGCGTCAATCAAGTGGTTGAACAAGGTGCGTAGCGCCATCAGTGACCACATCCGCACCAGCATCGAGAAAGGGAAACTGTTCGAGCTCGCCTCCTTGGGCAGCAACATGTTCGGTGTCCCGGCTCTTTCAGCGCGCCCCTCGACGCTCCAACCTGTGTTGGCGTTTGAGGCTGACCCCAATCACGACCTGAACCTTGTCAGGGTCTATATGCAGGACAGCGCCGGCAAGCTCACTCCCTGGGACCCGACGCCCAACGCGGTCACGACGACGTCGAATCCATCAGAGCCTGATGCGCAGAGC…	MNITPLTSAAGKGSSAQGTDKISIPNSTRMINAASIKWLNKVRSAISDHIRTSIEKGKLFELASLGSNMFGVPALSARPSTLQPVLAFEADPNHDLNLVRVYMQDSAGKLTPWDPTPNAVTTTSNPSEPDAQSDTASSSLPRRPPAGSVLSLLGIALDHAQRHSPRADRSAKGRPGREERNGARFNAKQTKPTEAEAYGDHQAPDPDLTRPKETAQRVAESINSMREQQNGMQRAEGLLRAKEALQAREAARKQLLDVLEAIQAGREDSTDKKISATEKNATGINYQ	22	-	58018	58049	AGGAACTCATTACCGCGAATCGCCACTCAGCA
Pseudomonas syringae	1	PatICMP4303	PatICMP4303|ALO88_04335	Cluster_828.1	Type III Effector	PatICMP4303_Contig_93	+	2483	5251	2769	922	ATGATGCCATCTCAGATCACGCGCTCCTCTCATTCATCCTCGCCGGATGCCTCTCAACCGGCTTGCGATGCTGCAAGTAGCCTCGAGCAATCGCCGCAGCAGGTCCGCACCCGGGCGTTTGTCGCCAAAGGCAAACTGTCTGAGGCATTCGGGCGCACGTCTACTGCGCCGGCGCAGGATGCGGTGCACCTGCTGAACAATCTTCAGCGCGAGCTGGCGAAAGAGAATCCGTCTGGTCCCGAGCTTGCCCTGCTGGGCAAAGAGCTCGCCGCTGCCGCGATGACCGAGCAGGGCTCGCATCTGCTGGCCACCGAAGAACACCAGCACGTGTTGAAAGACGTGCTTGATCGTTGCATGCGCCAGTTGGCGGATACGCCTGCGTCTAATGCGTCCCATGTA…	MMPSQITRSSHSSSPDASQPACDAASSLEQSPQQVRTRAFVAKGKLSEAFGRTSTAPAQDAVHLLNNLQRELAKENPSGPELALLGKELAAAAMTEQGSHLLATEEHQHVLKDVLDRCMRQLADTPASNASHVPLSQACEGLKTARLHQSLAMLTGTSHTQTRGVADLLALTQLDPKVLAEKLDGQAPYESFGHFIRTARDSTAALNVSLSDPAGETTGLLRAQADTLEALEKLPAILAALIEHCPDMPTQKDLRSLKDAAGELLTKLRESALLKGSEEIVSEAGESPVHGRESVEPALTRSQALLKAGGKLVRKFDAYGAVAPMDDKKLLALLRTPAPHLSPAQMHAFLNRYAIQLTDEQRTIVSNTALPPASEGDIEAQGGMGFDEKLRLALADGSL…	44	+	2408	2439	GGGAACCGTTCCGGATCGAGCGCCACTTAGCC
Pseudomonas syringae	1	PatICMP4303	PatICMP4303|ALO88_04571	Cluster_406.2	Type III Effector	PatICMP4303_Contig_110	-	36003	40142	4140	1379	CTGAGCCGATGGAGCCCGCTCATGACCTTAAGAATCAATACTCGTTCTGCTACCCCGGTTGTACCTCTGGAAACAGGCTCTTCGTCGCAGCCGGCACCGCCGCCTGTCACGGCAAGAGCGACTGAGCCTCCCCCCGTCGCCAATCCTGCGGCGCCTAAATCAGCGCCAGGTGTTCAGCAAGCACACGGGCTGAAGACGCGCATCGCTGGCAAACTTTCCGAACGTCAGACCAATTTCAGTCTTGGTATTCCCGGCACCGGTCGTACTCTCAACCGGCCCCTGCGCAGCGGGATTCCGGAGGAAGGTGAGCAGGTATCGAACGAGGAGAGTCATGATCCGTTGCTCAAGGAAGCGCATGAACTGCAGCGCATGGTGGAGTCGGCGCTGACCCATCTGAAG…	MSRWSPLMTLRINTRSATPVVPLETGSSSQPAPPPVTARATEPPPVANPAAPKSAPGVQQAHGLKTRIAGKLSERQTNFSLGIPGTGRTLNRPLRSGIPEEGEQVSNEESHDPLLKEAHELQRMVESALTHLKAAPTSLWERPAPSTVRRITTKVFPWLKPAPLREVASNGSNAKTKIKIKINSQQSPETIAAAVKELSTRLDHQSKVLATATHALVAAREHLESLEQATPPSSTERLDHARARVQQADSTTRLASQQLRELIQGTEVLQLGALSEGQDQVEQKAEFSQQWLSELRTRMQAVDVRFADRHAAIEIELQLKVAQTRELISLDHDMTAAEHTAAQANTQLSALRAQRQETPEGSDEADRLDTAIGQTLAARSQAMQTHQQLAKKLVRVDAD…	261	-	40403	40434	CGGAACCGAATCCATATTTCGACCACCCATCC
Pseudomonas syringae	1	PatICMP4303	PatICMP4303|ALO88_04932	Cluster_452.2	Type III Effector	PatICMP4303_Contig_3	-	29495	35368	5874	1957	ATGGTCAAGGTTACCTCTTCCGGATTTACTGCCAACCCACTCTCTCATCATGCGGACAGTGTTTCCCCCGCGAACAGTCCCCCTCAGTTACCGGAGCCTGTGCCTCTGGTTGATCTAAGCGAGTCGTCCCGCAAGGGCGGCATGCGAAATCGGCCGCATGCCAGTTTGAACAGTCAGGTGCTCGGACTGCAAGCGGTGCCGTCGCAACGTGGAATGCATGTTCGTGTCAGAAGTCATGCCGATGGCGAGAGTGTCATTAATGCCTGGCTGGCAAAGCGCCCCTCGGTTCAAAGCGAAACCAGTCTTGATAACGATGGCAAGCTGGTGCGTTACACCCCCGTGAATCATGAGCCGCTGGCCCCGCGCAATGAGGCGTTTTTCACCTCTGTGCCGGGGATG…	MVKVTSSGFTANPLSHHADSVSPANSPPQLPEPVPLVDLSESSRKGGMRNRPHASLNSQVLGLQAVPSQRGMHVRVRSHADGESVINAWLAKRPSVQSETSLDNDGKLVRYTPVNHEPLAPRNEAFFTSVPGMLMAVLTVHPEMEHGISGDITADAVAARLAEPPIGLLTGIWQSSHDRAYLERGGVVHTANMEERWAPLTLPGINPREPLRMAGLQADGGVYLHNGSQLWRLTETAAESVTTENLPEGAAVRIGAGGEVHGLHEGALHSNGISRPIELWRPKAGAPGREQSPARPVDLLPLPGGTAALILDDKGRIYHADLKGTGAVEAHRLKLPADFAQGKGWAVTAMGLSRDDTVHLMLQDQNGRRMSLQRAPGEALFRPAYLLDRPLLLLYTEGL…	173	-	35541	35572	CGGAACCGATCCGGTTGCCTGGCCACTCAATT
Pseudomonas syringae	1	PatICMP4303	PatICMP4303|ALO88_04934	Cluster_7521.1	Type III Effector	PatICMP4303_Contig_3	+	56463	56699	237	78	ATGACAATCGTGTCTGGACACATCGGAAAACACCCAAGCCTAACCACTTTTCAAGCTGGGTCTTCGGCTTCGGTCGAGAATCAAATGCCTGATACTGCACAGTTCAGTGATGGACGGTGGAAAAAGCTTCCGACCCAATTATCGTCAATTTCATTGGCGAGATTCGATCAGGATATTTGCACGAATAATCATGGCATCAGTCAGCGTGCAATGTGCTTTGGCCTTTCATTGAGCTAG	MTIVSGHIGKHPSLTTFQAGSSASVENQMPDTAQFSDGRWKKLPTQLSSISLARFDQDICTNNHGISQRAMCFGLSLS	30	+	56402	56433	GGGAACTGAACCGCTTATGAAACCACTCATTT
Pseudomonas syringae	1	PatICMP4303	PatICMP4303|ALO88_100546	Cluster_4422.1	Type III secretion related protein	PatICMP4303_Contig_52	+	117757	118731	975	324	ATGACCATGGGTGTTTCACCTATTCGTAACTCAAACTCCCTACCGATCGATTTTTCGTCGTTGAGCGCAAAGAGTGGCGGGCATAACGGGCTGGGCAGCGGAGACAATTCGACTATCGACCCGAGTACGTTGTTGTTCGGCAATCAAGGGCAGACGCAGGTCAATTTCGCTCCGCCCAACAGCACGGACTCCTCAACCAGCGGTGTGAACGCTGCGTCAGGTAATACGGCGTCCGGCCTGGTCGAGCAAATCATGAGCCTGCTGAAACAATTGATGCAGATGCTGATGCAAAACAACAATGCTTCCAGTAACCCTCAGACTGATTCGTCAACGCCAGGCGTCGGCAGTGGCAACAGCGTCGGGAGCGGCGGTACTGGAAGCAGTCTCGCAGGCAGTGAC…	MTMGVSPIRNSNSLPIDFSSLSAKSGGHNGLGSGDNSTIDPSTLLFGNQGQTQVNFAPPNSTDSSTSGVNAASGNTASGLVEQIMSLLKQLMQMLMQNNNASSNPQTDSSTPGVGSGNSVGSGGTGSSLAGSDGGDETSGVGNGGLGDAGSTPTTSAADGVPSDTSLTGSGGLHLPQQLEQYRGDIMDAAKATGVPPSVIAGQIWAESRGQLNAATTNVNGKADAGLMQVNADTFKSLQQQNPGLLGNDVNDSHTNIMAGALYLRDQNKEFGDMGAALRAYNSGPDKVNKADLSDTGGVGGSSYPADVLNFAKIIESGQGNLPA	89	+	117637	117668	GGGAACCGAGTCACTCAGTGAACCACTCAGTT
Pseudomonas syringae	1	PatICMP4303	PatICMP4303|ALO88_100906	Cluster_2594.1	Type III Effector	PatICMP4303_Contig_3	+	57924	58580	657	218	ATGATCACTCCGTCTCGATATCCAGGCATCTATATCGCCCCCCTCAGTAACGAACCGACAGCAGCTCACACATTCAAAGAACAACCAGAGGAGGCACTTGACCATATCAGCGCCGGCCCCTCGGGCGATAAGCTATTGCGAAAAATATCCACTCTTGCCAGTCAAAAAGATAGAAAAGTCACGCTAAAAGAGATTGAAATAAATAACCAGTGTTATACCGAAGCTGTTCTGAGCAGGAGGCAGCTTGAAAAGTACGAACCAGAAAACTTTAACGAGAATCGGCACATTGCATCACGGCTATCACGAAAGGGGGCCTTTACCAAAGGTGAGGGAAGCAATGCGATTATTGGCTGGTCACCAGACAAAGCAAGCATACGCTTAAATCAGAATGGCTCACCG…	MITPSRYPGIYIAPLSNEPTAAHTFKEQPEEALDHISAGPSGDKLLRKISTLASQKDRKVTLKEIEINNQCYTEAVLSRRQLEKYEPENFNENRHIASRLSRKGAFTKGEGSNAIIGWSPDKASIRLNQNGSPLHLGMDNDDKITTLAHELVHARHVLGGSSLADGGDRYNPRTGSGKEELRAVGLDKYRYSLTKKPSENSIRAEHGLPLRMKYRPHQ	181	+	57711	57743	TGGAACCGAATCCATCTCGAGGGCCACTCAAGC
Pseudomonas syringae	1	PatICMP4303	PatICMP4303|ALO88_101142	Cluster_7521.1	Type III Effector	PatICMP4303_Contig_34	-	24776	25585	810	269	ATGACAAACGTCTCTGGACACATTGGAAAATACCCGAGCCTCGCTAACGTTCAGGCTGGGTCTTCGGCGTCGGTCGAAAACCAGATGCCTGATCCTGCTCAGCACAGCGATGGTCGGTGGAAACAGCTTCCGACTCAGCTATCGTCTATTGCATTGTCGAGATTTGATCAAGGTATTTGCACGAATAATCACGGCATAAGCCAGCGTGCAATGTGCTTTGGCCTTTCGTTGAGCTGGATCAATATGATTCATGCAGGGAAAGACCATGCAACACCCTATGCGTCGGCAGAAAGAATGAGATTTTTGGGGTCATTCGAGGGTGTGGTGCACGCTCGTACTATTCATAACTTTTATCGAACTGAACATAAGTTTCTGTTGGAGCACTCGTCCTCAAATCCC…	MTNVSGHIGKYPSLANVQAGSSASVENQMPDPAQHSDGRWKQLPTQLSSIALSRFDQGICTNNHGISQRAMCFGLSLSWINMIHAGKDHATPYASAERMRFLGSFEGVVHARTIHNFYRTEHKFLLEHSSSNPGVSTGAMAGTESLLQAAEIKGLKLRPVLEDKSNSGLPFLIACKQSGRQIVTDEAALNSLCEAIVENRKGVLVIYSEEIAHALGFSVSPDGKSATLFDPNLGEFHTHSKALADTIENISSADGLTLVGVQIFASKMR	29	-	25614	25645	GGGAACCGATTCGCTTCTAAAACCACTCAATC
Pseudomonas syringae	1	PatICMP4303	PatICMP4303|ALO88_101444	Cluster_23272.1	NA	PatICMP4303_Contig_21	-	17147	17428	282	93	ATGGACGCCCTCAACCCTTTTGCATGGCAAGCACTTAATTGCCATTCACAACCGATCAAGGTGCCCAAGATGAAAAAAACCAAACTGCTCAACCGCGCTATCTGCATTGCCTTTTTTCCGCTGGCAGCATTGGCTGGCAACGCCTTCGCGGACTCAGGCTCGGCCTCAGCAGGAACTGGTAGTTCGCAGAGTGCAGCGGATCAGCGTGCAGCCATGGAGGCTGCTGCAGAGGCCGCCAAGCGATGCGGATTCGTTTTCGGACAAGGCCATGTCTGCGATTGA	MDALNPFAWQALNCHSQPIKVPKMKKTKLLNRAICIAFFPLAALAGNAFADSGSASAGTGSSQSAADQRAAMEAAAEAAKRCGFVFGQGHVCD	25	-	17453	17485	TGGAACCGGATGCTCTGCAAGGGCCACACATGC
Pseudomonas syringae	1	PatICMP4453	PatICMP4453|ALQ23_00611	Cluster_6364.1	Type III Effector	PatICMP4453_Contig_123	+	13631	14773	1143	380	ATGAACCCCATTCAGTCACGCTTCTCCAGTGTGCAAGAGCTCAGACGATCCAACGTTGATATTCCGGCGCTCAAAGCCAATGGCCAACTGGAGGTCGACGGCAAGAGGTACGAGATTCGTGCAGCCGATGACGGAACAATTTCGGTCCTTCGACCGGAGCAACAGTCCAAGGCGAAAAGTTTTTTCAAGGGCGCTTCTCAGTTGATAGGTGGCAGCAGCCAGCGCGCGCAGATTGCCCAGGCGCTCAACGAGAAAGTCGTATCGGCACGCACTGTATTGCACCAGGGCGCTGTGACGGGCGGACGCTTGGACACCCTTGAGCGGGGCGAAAGCAGCTCAGCCACAACAGCCATCAAACCCACTGCCAAACAGGCTGCGCAAAGTACTTTTAACAGCTTT…	MNPIQSRFSSVQELRRSNVDIPALKANGQLEVDGKRYEIRAADDGTISVLRPEQQSKAKSFFKGASQLIGGSSQRAQIAQALNEKVVSARTVLHQGAVTGGRLDTLERGESSSATTAIKPTAKQAAQSTFNSFHEWAKQAEAMRNPSRMDIYKIYKQDAPHSHPMSDEQQEEFLHTLKALNGKNGIEVRTQDHDSVRNKKDRNLDKYIAESPNAKRFFYRIIPKHERREDEHQGRLTIGVQPEYAAQLTRAMATLIGKESAITHGKVIGPACHGQMTDSAVLYINGDVAKAEKLGEKLKQMSGIPLDAFVEHTPLSMQSLSKGLSYAESILGDTRGHGMSRAEVISDALRMDGMPFLARLKLSLSANGYDPDNPALRNTK	455	+	13144	13176	TGGAACCGCCTCGAGCAGAGGCTCCACTCATTG
Pseudomonas syringae	1	PatICMP4453	PatICMP4453|ALQ23_00807	Cluster_9017.1	Type III Effector	PatICMP4453_Contig_135	+	13661	14338	678	225	ATGATCAATAGCATCCGTGGCGGAGCGGGCACATCGGCCTATCACATCCAGCCCCAGCCATTTGATGAGTTGAAACTGAAGCCTGAAGTCATTGAGAAAAAGACGGAAAGACTCAAGGATAAGGGATATTTCAGCGTTCGTATGTCGGAGCCTACGAAAAGCTATTTGCATCAGCGAAGCACGCTCAGCAATCCCGCATGGCGAAACCAGACCGTAGGACAAGTCATCGACTTGACGGGAACGGACTATGAGCGCTCGGTCACGGCAGTGGCAAAAGACATTGCAACGAGACTTACCGGGAAACAGGAACAACTGAAACCACAAGAATTTCAGCTGCGGCGGGCCAAAAATCAGGGGGCGGATAAATGGCACCAGGATAAGGAGCCGAAAAAGGTCATC…	MINSIRGGAGTSAYHIQPQPFDELKLKPEVIEKKTERLKDKGYFSVRMSEPTKSYLHQRSTLSNPAWRNQTVGQVIDLTGTDYERSVTAVAKDIATRLTGKQEQLKPQEFQLRRAKNQGADKWHQDKEPKKVICIATVEGRGTEFIKPSESKKLFETGEYAEMIPKNAEADAQKTAEAIAKKTNEAKKDRFYFFAGKGITEESIPKLVHRSPHESGRAIFMARWK	91	+	13538	13570	CGGAACCGCTCTTCAACTGGTTGCCACCAAGGC
Pseudomonas syringae	1	PatICMP4453	PatICMP4453|ALQ23_01171	Cluster_49085.1	Type III secretion related protein	PatICMP4453_Contig_162	+	1314	1538	225	74	ATGATCAGTTTCAACAGCTTGCAACGCCATCTCGACAACTCGGTGAGCCGTGCTCACACCAACATGGACCAGGCAGCGATGGAAGCCTCCGAGAGTGGCACCGTCGAAGACCTGCAGGCATTCAACGATGCCCAGCAGCAGGTCGATGTCGCCGGTATTGCCGTCAATGAATGCCTGCGTGCCAAGCACGGTATCAATAAAGCAGTCATCGATGGAATTCAGTGA	MISFNSLQRHLDNSVSRAHTNMDQAAMEASESGTVEDLQAFNDAQQQVDVAGIAVNECLRAKHGINKAVIDGIQ	30	+	1252	1284	TGGAACCGCTCGGCGGGTTTGCTCCACTCAAGG
Pseudomonas syringae	1	PatICMP4453	PatICMP4453|ALQ23_01179	Cluster_3403.1	Type III secretion related protein	PatICMP4453_Contig_162	-	9075	9644	570	189	ATGACCGCACCGATCAAAACCCCGGCCAAAGCGCCACCAGCACCCCAGCGCCCTGCGCCTGTCGAGCGGCCAGCCACAACTCTCAGTGAAAAACCATTCGGTGAAAAACGCCTTGCATCCGGTGGCCTGGGCCGTGGCGATGTACAGACCAGCCGTTCGGTACTGAGCAAGTCGCTGCAAGACACCCCGATGAGTGCCGACGGCATGTTCTTTTCGCAACTGCTGGTGCCGCCCGTAAGTGCCGAACCTGGTCAGCAAGGCTTTGGCGGGGGCGGTATAGCCTTTCCGGTACGCGCAGAACAAGTGCCGACCCAACTGATCGACGAGCTGGCGCAGCGCCTGCCGGATCAGCCTGACGGCCCCCTCAGTTTCACCCTGCTGATGCCCAGCCTGGGCAGC…	MTAPIKTPAKAPPAPQRPAPVERPATTLSEKPFGEKRLASGGLGRGDVQTSRSVLSKSLQDTPMSADGMFFSQLLVPPVSAEPGQQGFGGGGIAFPVRAEQVPTQLIDELAQRLPDQPDGPLSFTLLMPSLGSVRVNANKTENRWSVQLGFARRDVLKRLSAHTGACRDSLSQALGQDVELDMHEDLSA	6048	-	15692	15724	GGGAACTGATCCGGGACCGTGACCCACTCAGCG
Pseudomonas syringae	1	PatICMP4453	PatICMP4453|ALQ23_01184	Cluster_4852.1	Type III secretion related protein	PatICMP4453_Contig_162	-	14559	15665	1107	368	ATGAAAATCGTCGCTCCGCCTATCATGCGAATACTTCCGGTCGCGCCGACCCGCGTCGTGACGCCTGCTGCGCAGCCACTTCCCAATGCTGATCTGCACAATTCAGGGACTTCGCCACAACAGGTTTCGCGCTTCGCGGCCGCGCTCATCCAGCACAGACGCATCCTCATTCAGCGCGACCTGATCGCCAGCAACAATGCCTTGCAGTCGCGAGCGGTGAAGCTCGGTGAGCTTTATCAACTGCTGATGACCGATCAGGACACCGGGCTGGATAACGCGGCCAGGGTATTGCGCAAAAAGCTCATGCAGGACGACTCGTCCTCAGATCTGAAGCAGGTTCTGGATTACACCGACGGTGATGCCGCCAAGGCTCATGTGGTGTTGCAAGCCGCCAGAAAA…	MKIVAPPIMRILPVAPTRVVTPAAQPLPNADLHNSGTSPQQVSRFAAALIQHRRILIQRDLIASNNALQSRAVKLGELYQLLMTDQDTGLDNAARVLRKKLMQDDSSSDLKQVLDYTDGDAAKAHVVLQAARKQAEADGEMGEHVVLTQQLKQLRRKYGPRARAGINSAKAFARPNIDNKRRVALRNLYSVAVSGQPNITGLIEALLGEQQEAGQFNIDLRDMRTAIADDLSAMTPSASHEQLRTLMHGLNTARHVTTLLKGCEHLLGRMRNKNPDLTVDPPAFLKHLLTLTANGMNVNQTLQLTQHIGGKQLKHQLAFLNGLRPMLLQLPILLWRDMKSRQTALSNLLILMAELTTQEQKQLYGGLV	27	-	15692	15724	GGGAACTGATCCGGGACCGTGACCCACTCAGCG
Pseudomonas syringae	1	PatICMP4453	PatICMP4453|ALQ23_01186	Cluster_477.1	Type III Effector	PatICMP4453_Contig_162	+	16550	18892	2343	780	ATGCGTATATCCAGTTCTCCCTTCGTTATCGTGAACCAACCCACTCCTGGCGAACTGGCTCTGGCTGTTGAGTCGCCTCTTGCCAAAGCCTTGCCGACACCTGCGGGTGGCGGTGGGCAAGCCGGCGTGCAGTTCGGTCAGCCGGCCGGCAACACGCAAGGCGCGCCGACAGGAGCCGAGCAGACCGCGTCGTCTATCCTGGCTCTTTTGCTCCAGGGCAGTGGCGGGGCAGCTGCCAATGCCAATGTGAATAATCAGGTCCAGCCGCAACCCTGCGCAGATTCTCCTGCCGAGGCTGCACCGACTGAAGCGACTGCCCCGGCCGCTCCGGTTGAACAGGTCGCAGCTCCCACGAACACAGATGCAACCGACGCTTCCAACGCCCCAAAAGCCGCAGAC…	MRISSSPFVIVNQPTPGELALAVESPLAKALPTPAGGGGQAGVQFGQPAGNTQGAPTGAEQTASSILALLLQGSGGAAANANVNNQVQPQPCADSPAEAAPTEATAPAAPVEQVAAPTNTDATDASNAPKAADAAFLDNSEYSSPEALKRWEPMVAHLPPEEREQAAKELNRPIAAAWMARDDGPDAGKAMDFINANPALKTAVDVAQGGGNADGKITNKDLKTFAKNMEKAADSADKDLANYTKDNPDADPQSLEMVRSAAVMRANMPLAIAADPHHAVDAADKTKVDVNVDAEDLKGLAQSNPGLSGALKQSCSTWSQPGFLGQVDEAGMSGRKKAAHSPDKMFDAKNLSEWIKKSAPTNGGQFASMLSDSATLNAVAGIDISKLDKDVFDKPKSYS…	32	+	16487	16518	TGGAACCAACTTGCACCTTCAACCACACAGTT
Pseudomonas syringae	1	PatICMP4453	PatICMP4453|ALQ23_01263	Cluster_4422.1	Type III secretion related protein	PatICMP4453_Contig_168	+	15718	16692	975	324	ATGACCATGGGTGTTTCACCTATTCGTAACTCAAACTCCCTACCGATCGATTTTTCGTCGTTGAGCGCAAAGAGTGGCGGGCATAACGGGCTGGGCAGCGGAGACAATTCGACTATCGACCCGAGTACGTTGTTGTTCGGCAATCAAGGGCAGACGCAGGTCAATTTCGCTCCGCCCAACAGCACGGACTCCTCAACCAGCGGTGTGAACGCTGCGTCAGGTAATACGGCGTCCGGCCTGGTCGAGCAAATCATGAGCCTGCTGAAACAATTGATGCAGATGCTGATGCAAAACAACAATGCTTCCAGTAACCCTCAGACTGATTCGTCAACGCCAGGCGTCGGCAGTGGCAACAGCGTCGGGAGCGGCGGTACTGGAAGCAGTCTCGCAGGCAGTGAC…	MTMGVSPIRNSNSLPIDFSSLSAKSGGHNGLGSGDNSTIDPSTLLFGNQGQTQVNFAPPNSTDSSTSGVNAASGNTASGLVEQIMSLLKQLMQMLMQNNNASSNPQTDSSTPGVGSGNSVGSGGTGSSLAGSDGGDETSGVGNGGLGDAGSTPTTSAADGVPSDTSLTGSGGLHLPQQLEQYRGDIMDAAKATGVPPSVIAGQIWAESRGQLNAATTNVNGKADAGLMQVNADTFKSLQQQNPGLLGNDVNDSHTNIMAGALYLRDQNKEFGDMGAALRAYNSGPDKVNKADLSDTGGVGGSSYPADVLNFAKIIESGQGNLPA	89	+	15598	15629	GGGAACCGAGTCACTCAGTGAACCACTCAGTT
Pseudomonas syringae	1	PatICMP4453	PatICMP4453|ALQ23_01912	Cluster_28714.2	Type III secretion related protein	PatICMP4453_Contig_33	-	757	1131	375	124	GTGACCATTTCCCAACTCAGCAATTTGAAAAGTGTATCGCCGGAGCTTGGGCAGAATGCTCATCAGGGGCTCGGCTCCGAACCCGTTCAGGCGGATGTCGACCTATTCAATGCGGCGATGCGCCCTGACAGCGGGCCCGCAGCGTCGCACCTGTCCGACCGGATAGCCAGTGCGCTGTCCGAGCGGCTGGGCAGTACCGAGAAGCTTTCACAGCAAGCATTACGCCAGATGAAGAAAGTGTCGAACACCGAAGATCCTGGAGACATCGTGCAGATGAGTCGGGCGTTGTCGCAGTGCTCGTTGCAAATGGCGTTGACGACCAAGGTCGTGAGCAAGAGCGCTCAGGCGCTCGACAAGTTGACCAACCTGCAGTAG	MTISQLSNLKSVSPELGQNAHQGLGSEPVQADVDLFNAAMRPDSGPAASHLSDRIASALSERLGSTEKLSQQALRQMKKVSNTEDPGDIVQMSRALSQCSLQMALTTKVVSKSAQALDKLTNLQ	1582	-	2713	2745	TGGAACCGATTCGCAGGCTGCTGCCACCTAGTG
Pseudomonas syringae	1	PatICMP4453	PatICMP4453|ALQ23_01919	Cluster_3390.2	Type III secretion related protein	PatICMP4453_Contig_33	-	15400	15894	495	164	ATGACCAACAATGACCAGTACCACACCCTTATCAACGAAATCTGCGCACTCAGCCTGATTTCCACACCTGAACGTTTCTATGAATCTGCCAATTTCAAAATCAGCGAAGTGGACTTCACCCTGCAGTTTCAGGACCGCGACGAAGGCCGTGCCGTTCTGATCTACGGTGACATGGGCGCGTTGCCCGCGCGCGGCCGTGAGAGCGCGTTGCTGGCGTTGATGGACATCAACTTTCACATGTTCGCGGGCGCCCACAGCCCGGCATTTTCCTTTAATGCGCAGACCGGTCGTGTGCTGCTGATGGGCTCTGTGGCCCTTGAACGAGCCTCTGCCGAAGGCGTGCTGTTGTTGATGAAGTCGTTTTCCGACCTGGCCAAAGAGTGGCGCGAGCATGGATTC…	MTNNDQYHTLINEICALSLISTPERFYESANFKISEVDFTLQFQDRDEGRAVLIYGDMGALPARGRESALLALMDINFHMFAGAHSPAFSFNAQTGRVLLMGSVALERASAEGVLLLMKSFSDLAKEWREHGFMGQATTVGASTDQPVAPAAKRESLSAPGRFQ	57	-	15951	15983	AGGAACTGAAATGCCTATGCCTGCGACTCAGTG
Pseudomonas syringae	1	PatICMP4453	PatICMP4453|ALQ23_01920	Cluster_4528.1	Type III secretion related protein	PatICMP4453_Contig_33	+	16200	17477	1278	425	ATGAGCATCGGCATCACACCCCGGCCGCAACAGACCACCACGCCACTCGATTTTTCGGCGCTAAGCGGCAAGAGTCCTCAACCAAACACGTTCGGCGAGCAGAACACTCAGCAAGCGATCGACCCGAGTGCACTGTTGTTCGGCAGCGACACACAGAAAGACGTCAACTTCGGCACGCCCGACAGCACCGTCCAGAATCCGCAGGACGCCAGCAAGCCCAACGACAGCCAGTCCAACATCGCTAAATTGATCAGTGCATTGATCATGTCGTTGCTGCAGATGCTCACCAACTCCAATAAAAAGCAGGATGCCAATCAGGAGCAGCCTGATAGCCAGGCTCCTTTCCAGAACAACGGCGGGCTCGGTACACCGTCGGCCGATAGCGGGGGCGGCGGTACA…	MSIGITPRPQQTTTPLDFSALSGKSPQPNTFGEQNTQQAIDPSALLFGSDTQKDVNFGTPDSTVQNPQDASKPNDSQSNIAKLISALIMSLLQMLTNSNKKQDANQEQPDSQAPFQNNGGLGTPSADSGGGGTPDATGGGGGGDTPSATGGGGGDTPTATGGGGSGGGGTPTATGGGGGGTPTATGGGEGGVTPQITPQLANPNRTSGTGSVSDTAGSTEQAGKINVVKDTIKVGAGEVFDGHGATFTADKSMGNGDQGENQKPMFELAEGATLKNVNLGENEVDGIHVKAKNAQEVTIDNVHAQNVGEDLITVKGEGGAAVTNLNIKNSSAKGADDKVVQLNANTHLKIDNFKADDFGTMVRTNGGKQFDDMSIELNGIDANHGKFALVKSDSDDLKL…	122	+	16048	16078	GGGAACCGGTCGCTGCGCTTTGCCACTCACT
Pseudomonas syringae	1	PatICMP4453	PatICMP4453|ALQ23_02302	Cluster_2333.2	Type III Effector	PatICMP4453_Contig_41	+	1600	2463	864	287	ATGAACATTACGCCGCTCACGTCAGCCGCGGGCAAGGGCTCGTCCGCACAAGGCACAGACAAAATTTCCATTCCCAACTCCACGCGCATGATCAATGCCGCGTCAATCAAGTGGTTGAACAAGGTGCGTAGCGCCATCAGTGACCACATCCGCACCAGCATCGAGAAAGGGAAACTGTTCGAGCTCGCCTCCTTGGGCAGCAACATGTTCGGTGTCCCGGCTCTTTCAGCGCGCCCCTCGACGCTCCAACCTGTGTTGGCGTTTGAGGCTGACCCCAATCACGACCTGAACCTTGTCAGGGTCTATATGCAGGACAGCGCCGGCAAGCTCACTCCCTGGGACCCGACGCCCAACGCGGTCACGACGACGTCGAATCCATCAGAGCCTGATGCGCAGAGC…	MNITPLTSAAGKGSSAQGTDKISIPNSTRMINAASIKWLNKVRSAISDHIRTSIEKGKLFELASLGSNMFGVPALSARPSTLQPVLAFEADPNHDLNLVRVYMQDSAGKLTPWDPTPNAVTTTSNPSEPDAQSDTASSSLPRRPPAGSVLSLLGIALDHAQRHSPRADRSAKGRPGREERNGARFNAKQTKPTEAEAYGDHQAPDPDLTRPKETAQRVAESINSMREQQNGMQRAEGLLRAKEALQAREAARKQLLDVLEAIQAGREDSTDKKISATEKNATGINYQ	22	+	1547	1578	AGGAACTCATTACCGCGAATCGCCACTCAGCA
Pseudomonas syringae	1	PatICMP4453	PatICMP4453|ALQ23_02953	Cluster_828.1	Type III Effector	PatICMP4453_Contig_54	+	68731	71499	2769	922	ATGATGCCATCTCAGATCACGCGCTCCTCTCATTCATCCTCGCCGGATGCCTCTCAACCGGCTTGCGATGCTGCAAGTAGCCTCGAGCAATCGCCGCAGCAGGTCCGCACCCGGGCGTTTGTCGCCAAAGGCAAACTGTCTGAGGCATTCGGGCGCACGTCTACTGCGCCGGCGCAGGATGCGGTGCACCTGCTGAACAATCTTCAGCGCGAGCTGGCGAAAGAGAATCCGTCTGGTCCCGAGCTTGCCCTGCTGGGCAAAGAGCTCGCCGCTGCCGCGATGACCGAGCAGGGCTCGCATCTGCTGGCCACCGAAGAACACCAGCACGTGTTGAAAGACGTGCTTGATCGTTGCATGCGCCAGTTGGCGGATACGCCTGCGTCTAATGCGTCCCATGTA…	MMPSQITRSSHSSSPDASQPACDAASSLEQSPQQVRTRAFVAKGKLSEAFGRTSTAPAQDAVHLLNNLQRELAKENPSGPELALLGKELAAAAMTEQGSHLLATEEHQHVLKDVLDRCMRQLADTPASNASHVPLSQACEGLKTARLHQSLAMLTGTSHTQTRGVADLLALTQLDPKVLAEKLDGQAPYESFGHFIRTARDSTAALNVSLSDPAGETTGLLRAQADTLEALEKLPAILAALIEHCPDMPTQKDLRSLKDAAGELLTKLRESALLKGSEEIVSEAGESPVHGRESVEPALTRSQALLKAGGKLVRKFDAYGAVAPMDDKKLLALLRTPAPHLSPAQMHAFLNRYAIQLTDEQRTIVSNTALPPASEGDIEAQGGMGFDEKLRLALADGSL…	44	+	68656	68687	GGGAACCGTTCCGGATCGAGCGCCACTTAGCC
Pseudomonas syringae	1	PatICMP4453	PatICMP4453|ALQ23_02959	Cluster_3432.1	Type III Effector	PatICMP4453_Contig_54	+	79148	80050	903	300	ATGAAAATATCCGGCTCCACATCGCCTGCACACACTTCAACGAATTCCGCGCAGAAGTCCTCTTCAAAAGGGCTGCTGAGTGGTTTGGCCAAGCATTTCAAGGGGATGCTCGTTTCTGGCAACACTTCTGGTCATTCGGCGCTCGGGCATTACGCGTCATCCAGCAGCGGCTCCAAAGGCAAGGCACCGGTACGGGACGATTACAGCAACGGACCGCAAACACGCCTTAACAACACACCTCTGAAACGAGCACTGGCCCGAGAGCTTGATCGCTTTGGCTACGGTTCATCGGCGACCGAGTCTTTTGACCGCTCATTGCAGCGTAAGGATAAAAATCCAGAGCTTGGTCACCTTGATGACGACGAGTACCTCGCTTTGCGCATGTACACAACGCCGTTT…	MKISGSTSPAHTSTNSAQKSSSKGLLSGLAKHFKGMLVSGNTSGHSALGHYASSSSGSKGKAPVRDDYSNGPQTRLNNTPLKRALARELDRFGYGSSATESFDRSLQRKDKNPELGHLDDDEYLALRMYTTPFYRAVNHQLRDGKPSEDMKVVVEAMNKGLKRLAEHPDNVVKETLYRGINKVVDDKFIHKNFKLGEVYRDKTFVSATPDLSTVNATFTRHTVKSSKAKASAPVYQRSPLLEIESRSAVRVRQVSLSSAEEEGIFAPDTPFLVADKSRTDSGRWHIKLKEIDESDESSGL	516	+	78601	78632	TGGAACCGGACGAGGCTTTTTACCACTCAATG
Pseudomonas syringae	1	PatICMP4453	PatICMP4453|ALQ23_04584	Cluster_406.2	Type III Effector	PatICMP4453_Contig_13	+	26144	27827	1684	561	CTGAGCCGATGGAGCCCGCTCATGACCTTAAGAATCAATACTCGTTCTGCTACCCCGGTTGTACCTCTGGAAACAGGCTCTTCGTCGCAGCCGGCACCGCCGCCTGTCACGGCAAGAGCGACTGAGCCTCCCCCCGTCGCCAATCCTGCGGCGCCTAAATCAGCGCCAGGTGTTCAGCAAGCACACGGGCTGAAGACGCGCATCGCTGGCAAACTTTCCGAACGTCAGACCAATTTCAGTCTTGGTATTCCCGGCACCGGTCGTACTCTCAACCGGCCCCTGCGCAGCGGGATTCCGGAGGAAGGTGAGCAGGTATCGAACGAGGAGAGTCATGATCCGTTGCTCAAGGAAGCGCATGAACTGCAGCGCATGGTGGAGTCGGCGCTGACCCATCTGAAG…	MSRWSPLMTLRINTRSATPVVPLETGSSSQPAPPPVTARATEPPPVANPAAPKSAPGVQQAHGLKTRIAGKLSERQTNFSLGIPGTGRTLNRPLRSGIPEEGEQVSNEESHDPLLKEAHELQRMVESALTHLKAAPTSLWERPAPSTVRRITTKVFPWLKPAPLREVASNGSNAKTKIKIKINSQQSPETIAAAVKELSTRLDHQSKVLATATHALVAAREHLESLEQATPPSSTERLDHARARVQQADSTTRLASQQLRELIQGTEVLQLGALSEGQDQVEQKAEFSQQWLSELRTRMQAVDVRFADRHAAIEIELQLKVAQTRELISLDHDMTAAEHTAAQANTQLSALRAQRQETPEGSDEADRLDTAIGQTLAARSQAMQTHQQLAKKLVRVDAD…	261	+	25852	25883	CGGAACCGAATCCATATTTCGACCACCCATCC
Pseudomonas syringae	1	PatICMP4453	PatICMP4453|ALQ23_04942	Cluster_4702.2	Type III secretion related protein	PatICMP4453_Contig_33	-	1159	2316	1158	385	TTGCCCCCTCATCAGAGGGGGCCGCTACCTTGGGATGGGCGTTTTATGCAAGCACTTAACAGCATCAGTTCGTTGCAAACCTCTGCATCATTGTTCCCCGTGTCGCTCAACAGCGATGTGAGCGCCAACACCAGCACTTCCAGCAAAGAGCTCAAGGCTGTGATCGATCAGCTGGTTCAGGCGCTGACCCAAAGTGGGCAGCTCGATGAAACCTCACCGCTCGGCAAAATGCTCGCCAAGGCCATGGCTGCGGATGGCAAGTCGGCTAACAGCATCGATGACATCACTGCATCGCTCGACAAGCTGATCCACGAAAAGCTCGGCGACAATTTCGGTGCCTCTGCCGGCATCGGCGCGGGTGGCGGTGGCGGTGGCATTGGCGGGGCGGGTTCTGGTTCG…	MPPHQRGPLPWDGRFMQALNSISSLQTSASLFPVSLNSDVSANTSTSSKELKAVIDQLVQALTQSGQLDETSPLGKMLAKAMAADGKSANSIDDITASLDKLIHEKLGDNFGASAGIGAGGGGGGIGGAGSGSGVGGGLSSDAGAGQSDLMSQVLNGLGKAVLDDLLTPSGEGGTTFSSDDMPTLEKVAQFMDDNKAQFPTRDGGSWMNELKEDNGLDAQETAQFRSALDVIGQQLGQQQGDASGVTSGGGLGSPVSDTSLGNPAIDANTGPAANGNASVDVGQLIGQLIDRGLQSVSSGGGLGTPVDNSTQPAGGTPAANPTGNVSNQDLGQLLSGLLQRGLEATLQDAGNTGADLQSSAAQVAAQLINALLQGTNNQTNQAVA	397	-	2713	2745	TGGAACCGATTCGCAGGCTGCTGCCACCTAGTG
Pseudomonas syringae	1	PatICMP4453	PatICMP4453|ALQ23_05092	Cluster_452.2	Type III Effector	PatICMP4453_Contig_46	-	80211	86084	5874	1957	ATGGTCAAGGTTACCTCTTCCGGATTTACTGCCAACCCACTCTCTCATCATGCGGACAGTGTTTCCCCCGCGAACAGTCCCCCTCAGTTACCGGAGCCTGTGCCTCTGGTTGATCTAAGCGAGTCGTCCCGCAAGGGCGGCATGCGAAATCGGCCGCATGCCAGTTTGAACAGTCAGGTGCTCGGACTGCAAGCGGTGCCGTCGCAACGTGGAATGCATGTTCGTGTCAGAAGTCATGCCGATGGCGAGAGTGTCATTAATGCCTGGCTGGCAAAGCGCCCCTCGGTTCAAAGCGAAACCAGTCTTGATAACGATGGCAAGCTGGTGCGTTACACCCCCGTGAATCATGAGCCGCTGGCCCCGCGCAATGAGGCGTTTTTCACCTCTGTGCCGGGGATG…	MVKVTSSGFTANPLSHHADSVSPANSPPQLPEPVPLVDLSESSRKGGMRNRPHASLNSQVLGLQAVPSQRGMHVRVRSHADGESVINAWLAKRPSVQSETSLDNDGKLVRYTPVNHEPLAPRNEAFFTSVPGMLMAVLTVHPEMEHGISGDITADAVAARLAEPPIGLLTGIWQSSHDRAYLERGGVVHTANMEERWAPLTLPGINPREPLRMAGLQADGGVYLHNGSQLWRLTETAAESVTTENLPEGAAVRIGAGGEVHGLHEGALHSNGISRPIELWRPKAGAPGREQSPARPVDLLPLPGGTAALILDDKGRIYHADLKGTGAVEAHRLKLPADFAQGKGWAVTAMGLSRDDTVHLMLQDQNGRRMSLQRAPGEALFRPAYLLDRPLLLLYTEGL…	173	-	86257	86288	CGGAACCGATCCGGTTGCCTGGCCACTCAATT
Pseudomonas syringae	1	PatICMP4453	PatICMP4453|ALQ23_100849	Cluster_2594.1	Type III Effector	PatICMP4453_Contig_46	+	108640	109296	657	218	ATGATCACTCCGTCTCGATATCCAGGCATCTATATCGCCCCCCTCAGTAACGAACCGACAGCAGCTCACACATTCAAAGAACAACCAGAGGAGGCACTTGACCATATCAGCGCCGGCCCCTCGGGCGATAAGCTATTGCGAAAAATATCCACTCTTGCCAGTCAAAAAGATAGAAAAGTCACGCTAAAAGAGATTGAAATAAATAACCAGTGTTATACCGAAGCTGTTCTGAGCAGGAGGCAGCTTGAAAAGTACGAACCAGAAAACTTTAACGAGAATCGGCACATTGCATCACGGCTATCACGAAAGGGGGCCTTTACCAAAGGTGAGGGAAGCAATGCGATTATTGGCTGGTCACCAGACAAAGCAAGCATACGCTTAAATCAGAATGGCTCACCG…	MITPSRYPGIYIAPLSNEPTAAHTFKEQPEEALDHISAGPSGDKLLRKISTLASQKDRKVTLKEIEINNQCYTEAVLSRRQLEKYEPENFNENRHIASRLSRKGAFTKGEGSNAIIGWSPDKASIRLNQNGSPLHLGMDNDDKITTLAHELVHARHVLGGSSLADGGDRYNPRTGSGKEELRAVGLDKYRYSLTKKPSENSIRAEHGLPLRMKYRPHQ	1491	+	107118	107149	GGGAACTGAACCGCTTATGAAACCACTCATTT
Pseudomonas syringae	1	PatICMP4453	PatICMP4453|ALQ23_101078	Cluster_7521.1	Type III Effector	PatICMP4453_Contig_49	+	55717	56526	810	269	ATGACAAACGTCTCTGGACACATTGGAAAATACCCGAGCCTCGCTAACGTTCAGGCTGGGTCTTCGGCGTCGGTCGAAAACCAGATGCCTGATCCTGCTCAGCACAGCGATGGTCGGTGGAAACAGCTTCCGACTCAGCTATCGTCTATTGCATTGTCGAGATTTGATCAAGGTATTTGCACGAATAATCACGGCATAAGCCAGCGTGCAATGTGCTTTGGCCTTTCGTTGAGCTGGATCAATATGATTCATGCAGGGAAAGACCATGCAACACCCTATGCGTCGGCAGAAAGAATGAGATTTTTGGGGTCATTCGAGGGTGTGGTGCACGCTCGTACTATTCATAACTTTTATCGAACTGAACATAAGTTTCTGTTGGAGCACTCGTCCTCAAATCCC…	MTNVSGHIGKYPSLANVQAGSSASVENQMPDPAQHSDGRWKQLPTQLSSIALSRFDQGICTNNHGISQRAMCFGLSLSWINMIHAGKDHATPYASAERMRFLGSFEGVVHARTIHNFYRTEHKFLLEHSSSNPGVSTGAMAGTESLLQAAEIKGLKLRPVLEDKSNSGLPFLIACKQSGRQIVTDEAALNSLCEAIVENRKGVLVIYSEEIAHALGFSVSPDGKSATLFDPNLGEFHTHSKALADTIENISSADGLTLVGVQIFASKMR	29	+	55657	55688	GGGAACCGATTCGCTTCTAAAACCACTCAATC
Pseudomonas syringae	1	PatICMP4453	PatICMP4453|ALQ23_101327	Cluster_23272.1	NA	PatICMP4453_Contig_162	-	21945	22226	282	93	ATGGACGCCCTCAACCCTTTTGCATGGCAAGCACTTAATTGCCATTCACAACCGATCAAGGTGCCCAAGATGAAAAAAACCAAACTGCTCAACCGCGCTATCTGCATTGCCTTTTTTCCGCTGGCAGCATTGGCTGGCAACGCCTTCGCGGACTCAGGCTCGGCCTCAGCAGGAACTGGTAGTTCGCAGAGTGCAGCGGATCAGCGTGCAGCCATGGAGGCTGCTGCAGAGGCCGCCAAGCGATGCGGATTCGTTTTCGGACAAGGCCATGTCTGCGATTGA	MDALNPFAWQALNCHSQPIKVPKMKKTKLLNRAICIAFFPLAALAGNAFADSGSASAGTGSSQSAADQRAAMEAAAEAAKRCGFVFGQGHVCD	25	-	22251	22283	TGGAACCGGATGCTCTGCAAGGGCCACACATGC
Pseudomonas syringae	1	PatICMP4959	PatICMP4959|ALQ24_00118	Cluster_452.1	Type III Effector	PatICMP4959_Contig_101	+	35119	40992	5874	1957	ATGGTCAAGGTTACCTCTTCCGGATTTACTGCCAACCCACTCTCTCATCATGCGGACAGTGTTTCCCCCGCGAACAGTCCCCCTCAGTTACCGGAGCCTGTGCCTCTGGTTGATCTAAGCGAGTCGTCCCGCAAGGGCGGCATGCGAAATCGGCCGCATGCCAGTTTGAACAGTCAGGTGCTCGGACTGCAAGCGGTGCCGTCGCAACGTGGAATGCATGTTCGTGTCAGAAGTCATGCCGATGGCGAGAGTGTCATTAATGCCTGGCTGGCAAAGCGCCCCTCGGTTCAAAGCGAAACCAGTCTTGATAACGATGGCAAGCTGGTGCGTTACACCCCCGTGAATCATGAGCCGCTGGCCCCGCGCAATGAGGCGTTTTTCACCTCTGTGCCGGGGATG…	MVKVTSSGFTANPLSHHADSVSPANSPPQLPEPVPLVDLSESSRKGGMRNRPHASLNSQVLGLQAVPSQRGMHVRVRSHADGESVINAWLAKRPSVQSETSLDNDGKLVRYTPVNHEPLAPRNEAFFTSVPGMLMAVLTVHPEMEHGISGDITADAVAARLAEPPIGLLTGIWQSSHDRAYLERGGVVHTANMEERWAPLTLPGINPREPLRMAGLQADGGVYLHNGSQLWRLTETAAESVTTENLPEGAAVRIGAGGEVHGLHEGALHSNGISRPIELWRPKAGAPGREQSPARPVDLLPLPGGTAALILDDKGRIYHADLKGTGAVEAHRLKLPADFAQGKGWAVTAMGLSRDDTVHLMLQDQNGRRMSLQRAPGEALFRPAYLLDRPLLLLYTEGL…	173	+	34915	34946	CGGAACCGATCCGGTTGCCTGGCCACTCAATT
Pseudomonas syringae	1	PatICMP4959	PatICMP4959|ALQ24_02865	Cluster_4528.1	Type III secretion related protein	PatICMP4959_Contig_37	-	8758	10035	1278	425	ATGAGCATCGGCATCACACCCCGGCCGCAACAGACCACCACGCCACTCGATTTTTCGGCGCTAAGCGGCAAGAGTCCTCAACCAAACACGTTCGGCGAGCAGAACACTCAGCAAGCGATCGACCCGAGTGCACTGTTGTTCGGCAGCGACACACAGAAAGACGTCAACTTCGGCACGCCCGACAGCACCGTCCAGAATCCGCAGGACGCCAGCAAGCCCAACGACAGCCAGTCCAACATCGCTAAATTGATCAGTGCATTGATCATGTCGTTGCTGCAGATGCTCACCAACTCCAATAAAAAGCAGGATGCCAATCAGGAGCAGCCTGATAGCCAGGCTCCTTTCCAGAACAACGGCGGGCTCGGTACACCGTCGGCCGATAGCGGGGGCGGCGGTACA…	MSIGITPRPQQTTTPLDFSALSGKSPQPNTFGEQNTQQAIDPSALLFGSDTQKDVNFGTPDSTVQNPQDASKPNDSQSNIAKLISALIMSLLQMLTNSNKKQDANQEQPDSQAPFQNNGGLGTPSADSGGGGTPDATGGGGGGDTPSATGGGGGDTPTATGGGGSGGGGTPTATGGGGGGTPTATGGGEGGVTPQITPQLANPNRTSGTGSVSDTAGSTEQAGKINVVKDTIKVGAGEVFDGHGATFTADKSMGNGDQGENQKPMFELAEGATLKNVNLGENEVDGIHVKAKNAQEVTIDNVHAQNVGEDLITVKGEGGAAVTNLNIKNSSAKGADDKVVQLNANTHLKIDNFKADDFGTMVRTNGGKQFDDMSIELNGIDANHGKFALVKSDSDDLKL…	122	-	10157	10187	GGGAACCGGTCGCTGCGCTTTGCCACTCACT
Pseudomonas syringae	1	PatICMP4959	PatICMP4959|ALQ24_02866	Cluster_3390.2	Type III secretion related protein	PatICMP4959_Contig_37	+	10341	10835	495	164	ATGACCAACAATGACCAGTACCACACCCTTATCAACGAAATCTGCGCACTCAGCCTGATTTCCACACCTGAACGTTTCTATGAATCTGCCAATTTCAAAATCAGCGAAGTGGACTTCACCCTGCAGTTTCAGGACCGCGACGAAGGCCGTGCCGTTCTGATCTACGGTGACATGGGCGCGTTGCCCGCGCGCGGCCGTGAGAGCGCGTTGCTGGCGTTGATGGACATCAACTTTCACATGTTCGCGGGCGCCCACAGCCCGGCATTTTCCTTTAATGCGCAGACCGGTCGTGTGCTGCTGATGGGCTCTGTGGCCCTTGAACGAGCCTCTGCCGAAGGCGTGCTGTTGTTGATGAAGTCGTTTTCCGACCTGGCCAAAGAGTGGCGCGAGCATGGATTC…	MTNNDQYHTLINEICALSLISTPERFYESANFKISEVDFTLQFQDRDEGRAVLIYGDMGALPARGRESALLALMDINFHMFAGAHSPAFSFNAQTGRVLLMGSVALERASAEGVLLLMKSFSDLAKEWREHGFMGQATTVGASTDQPVAPAAKRESLSAPGRFQ	57	+	10252	10284	AGGAACTGAAATGCCTATGCCTGCGACTCAGTG
Pseudomonas syringae	1	PatICMP4959	PatICMP4959|ALQ24_02872	Cluster_4702.2	Type III secretion related protein	PatICMP4959_Contig_37	+	23964	25076	1113	370	ATGCAAGCACTTAACAGCATCAGTTCGTTGCAAACCTCTGCATCATTGTTCCCCGTGTCGCTCAACAGCGATGTGAGCGCCAACACCAGCACTTCCAGCAAAGAGCTCAAGGCTGTGATCGATCAGCTGGTTCAGGCGCTGACCCAAAGTGGGCAGCTCGATGAAACCTCACCGCTCGGCAAAATGCTCGCCAAGGCCATGGCTGCGGATGGCAAGTCGGCTAACAGCATCGATGACATCACTGCATCGCTCGACAAGCTGATCCACGAAAAGCTCGGCGACAATTTCGGTGCCTCTGCCGGCATCGGCGCGGGTGGCGGTGGCGGTGGCATTGGCGGGGCGGGTTCTGGTTCGGGTGTCGGTGGCGGTCTGAGCAGCGACGCGGGTGCCGGGCAATCC…	MQALNSISSLQTSASLFPVSLNSDVSANTSTSSKELKAVIDQLVQALTQSGQLDETSPLGKMLAKAMAADGKSANSIDDITASLDKLIHEKLGDNFGASAGIGAGGGGGGIGGAGSGSGVGGGLSSDAGAGQSDLMSQVLNGLGKAVLDDLLTPSGEGGTTFSSDDMPTLEKVAQFMDDNKAQFPTRDGGSWMNELKEDNGLDAQETAQFRSALDVIGQQLGQQQGDASGVTSGGGLGSPVSDTSLGNPAIDANTGPAANGNASVDVGQLIGQLIDRGLQSVSSGGGLGTPVDNSTQPAGGTPAANPTGNVSNQDLGQLLSGLLQRGLEATLQDAGNTGADLQSSAAQVAAQLINALLQGTNNQTNQAVA	442	+	23490	23522	TGGAACCGATTCGCAGGCTGCTGCCACCTAGTG
Pseudomonas syringae	1	PatICMP4959	PatICMP4959|ALQ24_02873	Cluster_28714.2	Type III secretion related protein	PatICMP4959_Contig_37	+	25104	25478	375	124	GTGACCATTTCCCAACTCAGCAATTTGAAAAGTGTATCGCCGGAGCTTGGGCAGAATGCTCATCAGGGGCTCGGCTCCGAACCCGTTCAGGCGGATGTCGACCTATTCAATGCGGCGATGCGCCCTGACAGCGGGCCCGCAGCGTCGCACCTGTCCGACCGGATAGCCAGTGCGCTGTCCGAGCGGCTGGGCAGTACCGAGAAGCTTTCACAGCAAGCATTACGCCAGATGAAGAAAGTGTCGAACACCGAAGATCCTGGAGACATCGTGCAGATGAGTCGGGCGTTGTCGCAGTGCTCGTTGCAAATGGCGTTGACGACCAAGGTCGTGAGCAAGAGCGCTCAGGCGCTCGACAAGTTGACCAACCTGCAGTAG	MTISQLSNLKSVSPELGQNAHQGLGSEPVQADVDLFNAAMRPDSGPAASHLSDRIASALSERLGSTEKLSQQALRQMKKVSNTEDPGDIVQMSRALSQCSLQMALTTKVVSKSAQALDKLTNLQ	1582	+	23490	23522	TGGAACCGATTCGCAGGCTGCTGCCACCTAGTG
Pseudomonas syringae	1	PatICMP4959	PatICMP4959|ALQ24_02875	Cluster_2413.3	Type III secretion related protein	PatICMP4959_Contig_37	+	26290	26820	531	176	ATGATGAGCCTTTCTGCCGAGGATCACTGGATTCACTGGTGGTGCAACCCCTGGCAGTGGGCTCATTCGCAGTGGCATGACCGATTCGCCAACGCTCGTGGGTTATCGGTCAGTGACTGCGATGCGCTCATGGCCAGCCGTCATGGCGTGTTTCTGCAGAGTCTGGGCATTGACCCGGCTCAGCCGCCAGCGCCCGCGGAACCGGTGCTGCGCTGGTTGGCGCTGACGCCCTCGCAGCGTGAGCAGGCGCTAAGCCTGGCGCAGTGCATCTGCTTCTCCCGTAACGAAAGCGACGGCCCTGACGGTCAATGGTGCTGGGGGTTGACCAAAGCGCTGCGCCCCGGTGTCTGGCTGGAGTTTGAACATGAGGACGCGCGTCTTCTGCTGGGCGCCTGGCTT…	MMSLSAEDHWIHWWCNPWQWAHSQWHDRFANARGLSVSDCDALMASRHGVFLQSLGIDPAQPPAPAEPVLRWLALTPSQREQALSLAQCICFSRNESDGPDGQWCWGLTKALRPGVWLEFEHEDARLLLGAWLGPQYWSRLRLEWPPNEVPDTPGKAPENKLQALWQAIMWRVTAA	2768	+	23490	23522	TGGAACCGATTCGCAGGCTGCTGCCACCTAGTG
Pseudomonas syringae	1	PatICMP4959	PatICMP4959|ALQ24_02877	Cluster_49085.1	Type III secretion related protein	PatICMP4959_Contig_37	+	27532	27756	225	74	ATGATCAGTTTCAACAGCTTGCAACGCCATCTCGACAACTCGGTGAGCCGTGCTCACACCAACATGGACCAGGCAGCGATGGAAGCCTCCGAGAGTGGCACCGTCGAAGACCTGCAGGCATTCAACGATGCCCAGCAGCAGGTCGATGTCGCCGGTATTGCCGTCAATGAATGCCTGCGTGCCAAGCACGGTATCAATAAAGCAGTCATCGATGGAATTCAGTGA	MISFNSLQRHLDNSVSRAHTNMDQAAMEASESGTVEDLQAFNDAQQQVDVAGIAVNECLRAKHGINKAVIDGIQ	30	+	27470	27502	TGGAACCGCTCGGCGGGTTTGCTCCACTCAAGG
Pseudomonas syringae	1	PatICMP4959	PatICMP4959|ALQ24_02886	Cluster_3403.1	Type III secretion related protein	PatICMP4959_Contig_37	-	35293	35862	570	189	ATGACCGCACCGATCAAAACCCCGGCCAAAGCGCCACCAGCACCCCAGCGCCCTGCGCCTGTCGAGCGGCCAGCCACAACTCTCAGTGAAAAACCATTCGGTGAAAAACGCCTTGCATCCGGTGGCCTGGGCCGTGGCGATGTACAGACCAGCCGTTCGGTACTGAGCAAGTCGCTGCAAGACACCCCGATGAGTGCCGACGGCATGTTCTTTTCGCAACTGCTGGTGCCGCCCGTAAGTGCCGAACCTGGTCAGCAAGGCTTTGGCGGGGGCGGTATAGCCTTTCCGGTACGCGCAGAACAAGTGCCGACCCAACTGATCGACGAGCTGGCGCAGCGCCTGCCGGATCAGCCTGACGGCCCCCTCAGTTTCACCCTGCTGATGCCCAGCCTGGGCAGC…	MTAPIKTPAKAPPAPQRPAPVERPATTLSEKPFGEKRLASGGLGRGDVQTSRSVLSKSLQDTPMSADGMFFSQLLVPPVSAEPGQQGFGGGGIAFPVRAEQVPTQLIDELAQRLPDQPDGPLSFTLLMPSLGSVRVNANKTENRWSVQLGFARRDVLKRLSAHTGACRDSLSQALGQDVELDMHEDLSA	6048	-	41910	41942	GGGAACTGATCCGGGACCGTGACCCACTCAGCG
Pseudomonas syringae	1	PatICMP4959	PatICMP4959|ALQ24_02891	Cluster_4852.1	Type III secretion related protein	PatICMP4959_Contig_37	-	40777	41883	1107	368	ATGAAAATCGTCGCTCCGCCTATCATGCGAATACTTCCGGTCGCGCCGACCCGCGTCGTGACGCCTGCTGCGCAGCCACTTCCCAATGCTGATCTGCACAATTCAGGGACTTCGCCACAACAGGTTTCGCGCTTCGCGGCCGCGCTCATCCAGCACAGACGCATCCTCATTCAGCGCGACCTGATCGCCAGCAACAATGCCTTGCAGTCGCGAGCGGTGAAGCTCGGTGAGCTTTATCAACTGCTGATGACCGATCAGGACACCGGGCTGGATAACGCGGCCAGGGTATTGCGCAAAAAGCTCATGCAGGACGACTCGTCCTCAGATCTGAAGCAGGTTCTGGATTACACCGACGGTGATGCCGCCAAGGCTCATGTGGTGTTGCAAGCCGCCAGAAAA…	MKIVAPPIMRILPVAPTRVVTPAAQPLPNADLHNSGTSPQQVSRFAAALIQHRRILIQRDLIASNNALQSRAVKLGELYQLLMTDQDTGLDNAARVLRKKLMQDDSSSDLKQVLDYTDGDAAKAHVVLQAARKQAEADGEMGEHVVLTQQLKQLRRKYGPRARAGINSAKAFARPNIDNKRRVALRNLYSVAVSGQPNITGLIEALLGEQQEAGQFNIDLRDMRTAIADDLSAMTPSASHEQLRTLMHGLNTARHVTTLLKGCEHLLGRMRNKNPDLTVDPPAFLKHLLTLTANGMNVNQTLQLTQHIGGKQLKHQLAFLNGLRPMLLQLPILLWRDMKSRQTALSNLLILMAELTTQEQKQLYGGLV	27	-	41910	41942	GGGAACTGATCCGGGACCGTGACCCACTCAGCG
Pseudomonas syringae	1	PatICMP4959	PatICMP4959|ALQ24_02893	Cluster_477.1	Type III Effector	PatICMP4959_Contig_37	+	42768	45110	2343	780	ATGCGTATATCCAGTTCTCCCTTCGTTATCGTGAACCAACCCACTCCTGGCGAACTGGCTCTGGCTGTTGAGTCGCCTCTTGCCAAAGCCTTGCCGACACCTGCGGGTGGCGGTGGGCAAGCCGGCGTGCAGTTCGGTCAGCCGGCCGGCAACACGCAAGGCGCGCCGACAGGAGCCGAGCAGACCGCGTCGTCTATCCTGGCTCTTTTGCTCCAGGGCAGTGGCGGGGCAGCTGCCAATGCCAATGTGAATAATCAGGTCCAGCCGCAACCCTGCGCAGATTCTCCTGCCGAGGCTGCACCGACTGAAGCGACTGCCCCGGCCGCTCCGGTTGAACAGGTCGCAGCTCCCACGAACACAGATGCAACCGACGCTTCCAACGCCCCAAAAGCCGCAGAC…	MRISSSPFVIVNQPTPGELALAVESPLAKALPTPAGGGGQAGVQFGQPAGNTQGAPTGAEQTASSILALLLQGSGGAAANANVNNQVQPQPCADSPAEAAPTEATAPAAPVEQVAAPTNTDATDASNAPKAADAAFLDNSEYSSPEALKRWEPMVAHLPPEEREQAAKELNRPIAAAWMARDDGPDAGKAMDFINANPALKTAVDVAQGGGNADGKITNKDLKTFAKNMEKAADSADKDLANYTKDNPDADPQSLEMVRSAAVMRANMPLAIAADPHHAVDAADKTKVDVNVDAEDLKGLAQSNPGLSGALKQSCSTWSQPGFLGQVDEAGMSGRKKAAHSPDKMFDAKNLSEWIKKSAPTNGGQFASMLSDSATLNAVAGIDISKLDKDVFDKPKSYS…	32	+	42705	42736	TGGAACCAACTTGCACCTTCAACCACACAGTT
Pseudomonas syringae	1	PatICMP4959	PatICMP4959|ALQ24_03057	Cluster_828.1	Type III Effector	PatICMP4959_Contig_40	+	31653	34421	2769	922	ATGATGCCATCTCAGATCACGCGCTCCTCTCATTCATCCTCGCCGGATGCCTCTCAACCGGCTTGCGATGCTGCAAGTAGCCTCGAGCAATCGCCGCAGCAGGTCCGCACCCGGGCGTTTGTCGCCAAAGGCAAACTGTCTGAGGCATTCGGGCGCACGTCTACTGCGCCGGCGCAGGATGCGGTGCACCTGCTGAACAATCTTCAGCGCGAGCTGGCGAAAGAGAATCCGTCTGGTCCCGAGCTTGCCCTGCTGGGCAAAGAGCTCGCCGCTGCCGCGATGACCGAGCAGGGCTCGCATCTGCTGGCCACCGAAGAACACCAGCACGTGTTGAAAGACGTGCTTGATCGTTGCATGCGCCAGTTGGCGGATACGCCTGCGTCTAATGCGTCCCATGTA…	MMPSQITRSSHSSSPDASQPACDAASSLEQSPQQVRTRAFVAKGKLSEAFGRTSTAPAQDAVHLLNNLQRELAKENPSGPELALLGKELAAAAMTEQGSHLLATEEHQHVLKDVLDRCMRQLADTPASNASHVPLSQACEGLKTARLHQSLAMLTGTSHTQTRGVADLLALTQLDPKVLAEKLDGQAPYESFGHFIRTARDSTAALNVSLSDPAGETTGLLRAQADTLEALEKLPAILAALIEHCPDMPTQKDLRSLKDAAGELLTKLRESALLKGSEEIVSEAGESPVHGRESVEPALTRSQALLKAGGKLVRKFDAYGAVAPMDDKKLLALLRTPAPHLSPAQMHAFLNRYAIQLTDEQRTIVSNTALPPASEGDIEAQGGMGFDEKLRLALADGSL…	44	+	31578	31609	GGGAACCGTTCCGGATCGAGCGCCACTTAGCC
Pseudomonas syringae	1	PatICMP4959	PatICMP4959|ALQ24_03063	Cluster_3432.1	Type III Effector	PatICMP4959_Contig_40	+	42070	42972	903	300	ATGAAAATATCCGGCTCCACATCGCCTGCACACACTTCAACGAATTCCGCGCAGAAGTCCTCTTCAAAAGGGCTGCTGAGTGGTTTGGCCAAGCATTTCAAGGGGATGCTCGTTTCTGGCAACACTTCTGGTCATTCGGCGCTCGGGCATTACGCGTCATCCAGCAGCGGCTCCAAAGGCAAGGCACCGGTACGGGACGATTACAGCAACGGACCGCAAACACGCCTTAACAACACACCTCTGAAACGAGCACTGGCCCGAGAGCTTGATCGCTTTGGCTACGGTTCATCGGCGACCGAGTCTTTTGACCGCTCATTGCAGCGTAAGGATAAAAATCCAGAGCTTGGTCACCTTGATGACGACGAGTACCTCGCTTTGCGCATGTACACAACGCCGTTT…	MKISGSTSPAHTSTNSAQKSSSKGLLSGLAKHFKGMLVSGNTSGHSALGHYASSSSGSKGKAPVRDDYSNGPQTRLNNTPLKRALARELDRFGYGSSATESFDRSLQRKDKNPELGHLDDDEYLALRMYTTPFYRAVNHQLRDGKPSEDMKVVVEAMNKGLKRLAEHPDNVVKETLYRGINKVVDDKFIHKNFKLGEVYRDKTFVSATPDLSTVNATFTRHTVKSSKAKASAPVYQRSPLLEIESRSAVRVRQVSLSSAEEEGIFAPDTPFLVADKSRTDSGRWHIKLKEIDESDESSGL	516	+	41523	41554	TGGAACCGGACGAGGCTTTTTACCACTCAATG
Pseudomonas syringae	1	PatICMP4959	PatICMP4959|ALQ24_03501	Cluster_2333.2	Type III Effector	PatICMP4959_Contig_6	+	1560	2423	864	287	ATGAACATTACGCCGCTCACGTCAGCCGCGGGCAAGGGCTCGTCCGCACAAGGCACAGACAAAATTTCCATTCCCAACTCCACGCGCATGATCAATGCCGCGTCAATCAAGTGGTTGAACAAGGTGCGTAGCGCCATCAGTGACCACATCCGCACCAGCATCGAGAAAGGGAAACTGTTCGAGCTCGCCTCCTTGGGCAGCAACATGTTCGGTGTCCCGGCTCTTTCAGCGCGCCCCTCGACGCTCCAACCTGTGTTGGCGTTTGAGGCTGACCCCAATCACGACCTGAACCTTGTCAGGGTCTATATGCAGGACAGCGCCGGCAAGCTCACTCCCTGGGACCCGACGCCCAACGCGGTCACGACGACGTCGAATCCATCAGAGCCTGATGCGCAGAGC…	MNITPLTSAAGKGSSAQGTDKISIPNSTRMINAASIKWLNKVRSAISDHIRTSIEKGKLFELASLGSNMFGVPALSARPSTLQPVLAFEADPNHDLNLVRVYMQDSAGKLTPWDPTPNAVTTTSNPSEPDAQSDTASSSLPRRPPAGSVLSLLGIALDHAQRHSPRADRSAKGRPGREERNGARFNAKQTKPTEAEAYGDHQAPDPDLTRPKETAQRVAESINSMREQQNGMQRAEGLLRAKEALQAREAARKQLLDVLEAIQAGREDSTDKKISATEKNATGINYQ	22	+	1507	1538	AGGAACTCATTACCGCGAATCGCCACTCAGCA
Pseudomonas syringae	1	PatICMP4959	PatICMP4959|ALQ24_03594	Cluster_4422.1	Type III secretion related protein	PatICMP4959_Contig_61	+	18091	19065	975	324	ATGACCATGGGTGTTTCACCTATTCGTAACTCAAACTCCCTACCGATCGATTTTTCGTCGTTGAGCGCAAAGAGTGGCGGGCATAACGGGCTGGGCAGCGGAGACAATTCGACTATCGACCCGAGTACGTTGTTGTTCGGCAATCAAGGGCAGACGCAGGTCAATTTCGCTCCGCCCAACAGCACGGACTCCTCAACCAGCGGTGTGAACGCTGCGTCAGGTAATACGGCGTCCGGCCTGGTCGAGCAAATCATGAGCCTGCTGAAACAATTGATGCAGATGCTGATGCAAAACAACAATGCTTCCAGTAACCCTCAGACTGATTCGTCAACGCCAGGCGTCGGCAGTGGCAACAGCGTCGGGAGCGGCGGTACTGGAAGCAGTCTCGCAGGCAGTGAC…	MTMGVSPIRNSNSLPIDFSSLSAKSGGHNGLGSGDNSTIDPSTLLFGNQGQTQVNFAPPNSTDSSTSGVNAASGNTASGLVEQIMSLLKQLMQMLMQNNNASSNPQTDSSTPGVGSGNSVGSGGTGSSLAGSDGGDETSGVGNGGLGDAGSTPTTSAADGVPSDTSLTGSGGLHLPQQLEQYRGDIMDAAKATGVPPSVIAGQIWAESRGQLNAATTNVNGKADAGLMQVNADTFKSLQQQNPGLLGNDVNDSHTNIMAGALYLRDQNKEFGDMGAALRAYNSGPDKVNKADLSDTGGVGGSSYPADVLNFAKIIESGQGNLPA	89	+	17971	18002	GGGAACCGAGTCACTCAGTGAACCACTCAGTT
Pseudomonas syringae	1	PatICMP4959	PatICMP4959|ALQ24_04457	Cluster_9017.1	Type III Effector	PatICMP4959_Contig_99	+	6833	7510	678	225	ATGATCAATAGCATCCGTGGCGGAGCGGGCACATCGGCCTATCACATCCAGCCCCAGCCATTTGATGAGTTGAAACTGAAGCCTGAAGTCATTGAGAAAAAGACGGAAAGACTCAAGGATAAGGGATATTTCAGCGTTCGTATGTCGGAGCCTACGAAAAGCTATTTGCATCAGCGAAGCACGCTCAGCAATCCCGCATGGCGAAACCAGACCGTAGGACAAGTCATCGACTTGACGGGAACGGACTATGAGCGCTCGGTCACGGCAGTGGCAAAAGACATTGCAACGAGACTTACCGGGAAACAGGAACAACTGAAACCACAAGAATTTCAGCTGCGGCGGGCCAAAAATCAGGGGGCGGATAAATGGCACCAGGATAAGGAGCCGAAAAAGGTCATC…	MINSIRGGAGTSAYHIQPQPFDELKLKPEVIEKKTERLKDKGYFSVRMSEPTKSYLHQRSTLSNPAWRNQTVGQVIDLTGTDYERSVTAVAKDIATRLTGKQEQLKPQEFQLRRAKNQGADKWHQDKEPKKVICIATVEGRGTEFIKPSESKKLFETGEYAEMIPKNAEADAQKTAEAIAKKTNEAKKDRFYFFAGKGITEESIPKLVHRSPHESGRAIFMARWK	91	+	6710	6742	CGGAACCGCTCTTCAACTGGTTGCCACCAAGGC
Pseudomonas syringae	1	PatICMP4959	PatICMP4959|ALQ24_04794	Cluster_406.2	Type III Effector	PatICMP4959_Contig_145	-	1	1683	1683	561	CTGAGCCGATGGAGCCCGCTCATGACCTTAAGAATCAATACTCGTTCTGCTACCCCGGTTGTACCTCTGGAAACAGGCTCTTCGTCGCAGCCGGCACCGCCGCCTGTCACGGCAAGAGCGACTGAGCCTCCCCCCGTCGCCAATCCTGCGGCGCCTAAATCAGCGCCAGGTGTTCAGCAAGCACACGGGCTGAAGACGCGCATCGCTGGCAAACTTTCCGAACGTCAGACCAATTTCAGTCTTGGTATTCCCGGCACCGGTCGTACTCTCAACCGGCCCCTGCGCAGCGGGATTCCGGAGGAAGGTGAGCAGGTATCGAACGAGGAGAGTCATGATCCGTTGCTCAAGGAAGCGCATGAACTGCAGCGCATGGTGGAGTCGGCGCTGACCCATCTGAAG…	MSRWSPLMTLRINTRSATPVVPLETGSSSQPAPPPVTARATEPPPVANPAAPKSAPGVQQAHGLKTRIAGKLSERQTNFSLGIPGTGRTLNRPLRSGIPEEGEQVSNEESHDPLLKEAHELQRMVESALTHLKAAPTSLWERPAPSTVRRITTKVFPWLKPAPLREVASNGSNAKTKIKIKINSQQSPETIAAAVKELSTRLDHQSKVLATATHALVAAREHLESLEQATPPSSTERLDHARARVQQADSTTRLASQQLRELIQGTEVLQLGALSEGQDQVEQKAEFSQQWLSELRTRMQAVDVRFADRHAAIEIELQLKVAQTRELISLDHDMTAAEHTAAQANTQLSALRAQRQETPEGSDEADRLDTAIGQTLAARSQAMQTHQQLAKKLVRVDAD…	261	-	1944	1975	CGGAACCGAATCCATATTTCGACCACCCATCC
Pseudomonas syringae	1	PatICMP4959	PatICMP4959|ALQ24_05415	Cluster_6364.1	Type III Effector	PatICMP4959_Contig_58	-	9469	10611	1143	380	ATGAACCCCATTCAGTCACGCTTCTCCAGTGTGCAAGAGCTCAGACGATCCAACGTTGATATTCCGGCGCTCAAAGCCAATGGCCAACTGGAGGTCGACGGCAAGAGGTACGAGATTCGTGCAGCCGATGACGGAACAATTTCGGTCCTTCGACCGGAGCAACAGTCCAAGGCGAAAAGTTTTTTCAAGGGCGCTTCTCAGTTGATAGGTGGCAGCAGCCAGCGCGCGCAGATTGCCCAGGCGCTCAACGAGAAAGTCGTATCGGCACGCACTGTATTGCACCAGGGCGCTGTGACGGGCGGACGCTTGGACACCCTTGAGCGGGGCGAAAGCAGCTCAGCCACAACAGCCATCAAACCCACTGCCAAACAGGCTGCGCAAAGTACTTTTAACAGCTTT…	MNPIQSRFSSVQELRRSNVDIPALKANGQLEVDGKRYEIRAADDGTISVLRPEQQSKAKSFFKGASQLIGGSSQRAQIAQALNEKVVSARTVLHQGAVTGGRLDTLERGESSSATTAIKPTAKQAAQSTFNSFHEWAKQAEAMRNPSRMDIYKIYKQDAPHSHPMSDEQQEEFLHTLKALNGKNGIEVRTQDHDSVRNKKDRNLDKYIAESPNAKRFFYRIIPKHERREDEHQGRLTIGVQPEYAAQLTRAMATLIGKESAITHGKVIGPACHGQMTDSAVLYINGDVAKAEKLGEKLKQMSGIPLDAFVEHTPLSMQSLSKGLSYAESILGDTRGHGMSRAEVISDALRMDGMPFLARLKLSLSANGYDPDNPALRNTK	455	-	11066	11098	TGGAACCGCCTCGAGCAGAGGCTCCACTCATTG
Pseudomonas syringae	1	PatICMP4959	PatICMP4959|ALQ24_100994	Cluster_2594.1	Type III Effector	PatICMP4959_Contig_101	-	11907	12563	657	218	ATGATCACTCCGTCTCGATATCCAGGCATCTATATCGCCCCCCTCAGTAACGAACCGACAGCAGCTCACACATTCAAAGAACAACCAGAGGAGGCACTTGACCATATCAGCGCCGGCCCCTCGGGCGATAAGCTATTGCGAAAAATATCCACTCTTGCCAGTCAAAAAGATAGAAAAGTCACGCTAAAAGAGATTGAAATAAATAACCAGTGTTATACCGAAGCTGTTCTGAGCAGGAGGCAGCTTGAAAAGTACGAACCAGAAAACTTTAACGAGAATCGGCACATTGCATCACGGCTATCACGAAAGGGGGCCTTTACCAAAGGTGAGGGAAGCAATGCGATTATTGGCTGGTCACCAGACAAAGCAAGCATACGCTTAAATCAGAATGGCTCACCG…	MITPSRYPGIYIAPLSNEPTAAHTFKEQPEEALDHISAGPSGDKLLRKISTLASQKDRKVTLKEIEINNQCYTEAVLSRRQLEKYEPENFNENRHIASRLSRKGAFTKGEGSNAIIGWSPDKASIRLNQNGSPLHLGMDNDDKITTLAHELVHARHVLGGSSLADGGDRYNPRTGSGKEELRAVGLDKYRYSLTKKPSENSIRAEHGLPLRMKYRPHQ	181	-	12744	12776	TGGAACCGAATCCATCTCGAGGGCCACTCAAGC
Pseudomonas syringae	1	PatICMP4959	PatICMP4959|ALQ24_101235	Cluster_7521.1	Type III Effector	PatICMP4959_Contig_106	-	30570	31379	810	269	ATGACAAACGTCTCTGGACACATTGGAAAATACCCGAGCCTCGCTAACGTTCAGGCTGGGTCTTCGGCGTCGGTCGAAAACCAGATGCCTGATCCTGCTCAGCACAGCGATGGTCGGTGGAAACAGCTTCCGACTCAGCTATCGTCTATTGCATTGTCGAGATTTGATCAAGGTATTTGCACGAATAATCACGGCATAAGCCAGCGTGCAATGTGCTTTGGCCTTTCGTTGAGCTGGATCAATATGATTCATGCAGGGAAAGACCATGCAACACCCTATGCGTCGGCAGAAAGAATGAGATTTTTGGGGTCATTCGAGGGTGTGGTGCACGCTCGTACTATTCATAACTTTTATCGAACTGAACATAAGTTTCTGTTGGAGCACTCGTCCTCAAATCCC…	MTNVSGHIGKYPSLANVQAGSSASVENQMPDPAQHSDGRWKQLPTQLSSIALSRFDQGICTNNHGISQRAMCFGLSLSWINMIHAGKDHATPYASAERMRFLGSFEGVVHARTIHNFYRTEHKFLLEHSSSNPGVSTGAMAGTESLLQAAEIKGLKLRPVLEDKSNSGLPFLIACKQSGRQIVTDEAALNSLCEAIVENRKGVLVIYSEEIAHALGFSVSPDGKSATLFDPNLGEFHTHSKALADTIENISSADGLTLVGVQIFASKMR	29	-	31408	31439	GGGAACCGATTCGCTTCTAAAACCACTCAATC
Pseudomonas syringae	1	PatICMP4959	PatICMP4959|ALQ24_101523	Cluster_23272.1	NA	PatICMP4959_Contig_37	-	48163	48444	282	93	ATGGACGCCCTCAACCCTTTTGCATGGCAAGCACTTAATTGCCATTCACAACCGATCAAGGTGCCCAAGATGAAAAAAACCAAACTGCTCAACCGCGCTATCTGCATTGCCTTTTTTCCGCTGGCAGCATTGGCTGGCAACGCCTTCGCGGACTCAGGCTCGGCCTCAGCAGGAACTGGTAGTTCGCAGAGTGCAGCGGATCAGCGTGCAGCCATGGAGGCTGCTGCAGAGGCCGCCAAGCGATGCGGATTCGTTTTCGGACAAGGCCATGTCTGCGATTGA	MDALNPFAWQALNCHSQPIKVPKMKKTKLLNRAICIAFFPLAALAGNAFADSGSASAGTGSSQSAADQRAAMEAAAEAAKRCGFVFGQGHVCD	25	-	48469	48501	TGGAACCGGATGCTCTGCAAGGGCCACACATGC
Pseudomonas syringae	1	PatICMP4959	PatICMP4959|ALQ24_102209	Cluster_988.1	NA	PatICMP4959_Contig_35	-	26590	27717	1128	375	GTGTCGGGTCGGTGCTGTGCATTTCCAGCAAGTCTTCACGGACAGTTTTCTGTTTCATCTGCCACTGACGGCGAGCCACTTTGGGTGTTTTTGATAATGTGGGGCATGGATTTGCGAGGGTTTTACAGGATTGCAGCGTGCCTTGTGTTGCTGCTGTGTGGTGGCTGTGGCCAGGAGCGCAAGCTGGAGAGCTTTGGCGGGCCAACCATGGGCAGTCACTATTCAGTGGTGTATGTCCGCGGTGCCGGGCAGCCTGACCCGGTGGTAATGCGCCCGGAGGTCGAAGCCATTCTGGCTGACGTCGATCAACAGATGTCGCTGTGGCGCAGTGACTCGGACATTGAGCGTTTCAATGCGCTGCCAGCCAACAGCTGCCAGATCATGTCCACGTCGGTTTTG…	MSGRCCAFPASLHGQFSVSSATDGEPLWVFLIMWGMDLRGFYRIAACLVLLLCGGCGQERKLESFGGPTMGSHYSVVYVRGAGQPDPVVMRPEVEAILADVDQQMSLWRSDSDIERFNALPANSCQIMSTSVLHLIRVGEQLSRESDGAFDLTVKPLMDLWGLGAHALFEQMPLVRQLARTRTLVGYRNLRIVGQQLCKNAAVQVDLNSIAAGYAVDRITERMDALGVHDYMVQATGELKVSGLKPDGSPWRVNLDAPSDDGYDAPKLFPLTGHAMSTSGDYRRYRGGNGRHISDTLDALTGSPVNHGLASVTVLHPSALMADGLSSLLLILGPERGWNYAQEHKIPAFFVIRADKRFIIRSNASFDRLAVRSSQ	15	-	27732	27765	TGGGAACCCTGCGCAGGTCATTGACCACTCAGTG
Pseudomonas syringae	1	Pav631	Pav631|Pav631_0012	Cluster_2333.2	Type III Effector	NZ_JH951448	+	15240	16103	864	287	ATGAACATAACGCCGCTCACGTCAGCCGCGGGCAACGGCTCGTCCGCACAAGGCACAGACAAAATTTCCATTCCCAACTCCACGCGCATGATCAATGCCGCTTCAATCAAGTGGCTGAACAAGGTGCGTAGCGCCATCAGTGACCACATCCGCACCAGCATCGAGAAAGGGAAACTGTTCGAGTTGGCCTCCTTGGGCAGCAACATGTTCGGTGTCCCGGCTCTTTCAGCGCGCCCCTCGACGCTCCAACCTGTGTTAGCGTTTGAGGCTGACCCCAATCACGACCTGAACCTTGTCAGGGTCTATATGCAGGACAGCGCCGGCAAGCTCACTCCCTGGGACCCGACGCCCAACGCGGTCACGACGACGTCGACTCCATCAGAGCATGATGCGCAGAGC…	MNITPLTSAAGNGSSAQGTDKISIPNSTRMINAASIKWLNKVRSAISDHIRTSIEKGKLFELASLGSNMFGVPALSARPSTLQPVLAFEADPNHDLNLVRVYMQDSAGKLTPWDPTPNAVTTTSTPSEHDAQSDTASSSLPRRPPAGSVLSLLGIALDHAQRHSPRADRSAKGRPGREERNGARFNAKQTKPTKAEAHGDHQVPDPDLNRPKEAAQRVAESITSMREQKNGMQRAEGLLRAKEALQAREAARKQLLDVLEAIQSGREDSTDKKISATEKNATGINYQ	22	+	15187	15218	AGGAACTCATTACCGCGAATCGCCACTCAGCA
Pseudomonas syringae	1	Pav631	Pav631|Pav631_0478	Cluster_3243.1	Type III Effector	NZ_JH951456	-	2096	3559	1464	487	ATGCACATCAACCAATCCGCCCAACAACCGCCTGGCGTTGCAATGGAGAGTTTTCGGACAGCTTCCGACGCGTCCCTTGCTTCGAGTTCTGTGCGGTCTGTCAGCACTACCTCGAGCCGCGATCTACAAGCTATTACCGATTATCTGAAACATCACGTGTTCGCTGCGCACAGGTTTTCGGTAATAGGCTCACCGGATGAGCGTGATGCCGCTCTTGCACACAACGAGCAGATCGATGCGTTGGTAGAGACACGCGCCAACCGCCTTTACTCCGGAGGGGAGACCCCCGCAACCATCGCCGAAACATTCGCCAAGGCGGAAAAGTTCGACCGTTTGGCGACGACCGCATCAAGTGCTTTTGAGAACACGCCATTTGCCGCTGCCTCGGTGCTTCAGTAC…	MHINQSAQQPPGVAMESFRTASDASLASSSVRSVSTTSSRDLQAITDYLKHHVFAAHRFSVIGSPDERDAALAHNEQIDALVETRANRLYSGGETPATIAETFAKAEKFDRLATTASSAFENTPFAAASVLQYMQPAINKGDWLPTPLKPLTPLISGALSGAMDQVGTKMMDRARGDLHYLSTSPDKLHDAMAASVKRHSPALGRQVVDMGIAVQTFSALNVVRTVLAPALASRPSVQGAVDFGVSTAGGLVANAGFGDRMLSVQSRDHLRGGAFVLGMKDKEPKAALSEETDWLDAYKAIKSASYSGAALNAGKRMAGLPLDVATDGLKAVRSLVSATSLTKNGLALAGGYAGVSKLQKMATKNITDPATKAAVSQLSNLVGSVGVFAGWTTAGLATD…	80	-	3723	3755	TGGAACCGTTAACGGCCCAGCGACTACACAGCT
Pseudomonas syringae	1	Pav631	Pav631|Pav631_0791	Cluster_2594.1	Type III Effector	NZ_JH951471	-	463	1119	657	218	ATGATCACTCCGTCTCGATATCCAGGCATCTATATCGCCCCCCTCAGTAACGAACCGACAGCAGCTCACACATTCAAAGAACAAGCAGAGGAAGCACTTGACCATATCAGCGCAGCCCCCTCTGGCGATAAGCTATTGCGAAAAATATCCACTCTTGCCAGTCAAAAAGATAGAAAAGTCACGCTAAAAGAGATTGAAATAAATAACCAGTGTTATACCGAAGCTGTTCTAAGCAGGAGGCAACTGGAAAAGTACGGACCAGAAAACTTTAACGAGAACCGGCACATTGCATCACAGCTATCACGAAAGGGGACCTTTACCAACGGTGAAGGAAGCAACGCGATTATTGGCTGGTCACCAGACAAAGCAAGCATACGCTTAAATGAGAATGGCTCACCG…	MITPSRYPGIYIAPLSNEPTAAHTFKEQAEEALDHISAAPSGDKLLRKISTLASQKDRKVTLKEIEINNQCYTEAVLSRRQLEKYGPENFNENRHIASQLSRKGTFTNGEGSNAIIGWSPDKASIRLNENGSPLHLGMDNDDKITTLAHELVHARHVLGGSSLADGGDRYNPRTGSGKEELRAVGLDKYRYSLTKKPSENSIRAEHGLPLRMKYRAHQ	181	-	1300	1332	TGGAACCGAATCCATCTCGAGGGCCACTCAAGC
Pseudomonas syringae	1	Pav631	Pav631|Pav631_0797	Cluster_23027.1	NA	NZ_JH951471	+	9682	10782	1101	366	ATGTCATATCAAAAAGCAGAACCCGCTTACTTCACAACGACCCAAAGCCCAGTAGAGGTTTATACAGAATGGGACCCGTTGGAGGAGGTTATCGTCGGAATCATGGATGATATTCGTGTCCCGGATTGGGACATCGGCCTAAAAGCAATTATCCCGAAAGAATCCAGTGATTTTTTTATGACGTACTCCGGGCGACGCTTCCCAGAGGAGTTGCTTGTTAAAGCCAGGCAAGAAGTCAACACCTTAGCGCGAATATTGGAAACTGAAGGCGTTCGCGTAAAAAGGCCCAATGAGTCAAATCACCACCAACCCATCATGACGCCGCACTTTACAACGGGCGGAACCTTTTACTCTGCCATGCCCAGAGATTGTCTTTTCGCGATCGGCAAAAAAATCATT…	MSYQKAEPAYFTTTQSPVEVYTEWDPLEEVIVGIMDDIRVPDWDIGLKAIIPKESSDFFMTYSGRRFPEELLVKARQEVNTLARILETEGVRVKRPNESNHHQPIMTPHFTTGGTFYSAMPRDCLFAIGKKIIEVPMAWRSRYFETFAFRDLLNDYFSQGAEWIAAPKPMLKDDVWQPNYDFEQELPFRSIITEVEPLFDAADFMKMGRDIIGQRSHVTNNKGIEWLRRTLGPDYRVHIYEFEEPGPMHIDTTILPLAPGRVLINKDWVPQIPDIFKDWEILNPPPSNLPDDHPLFITSKWIHTNVLMLDERTVVVEKDEEALISAFRKWGFETILCPFKHFQSFGGSFHCATLDVKRRGGLHRYI	1292	+	8334	8366	TGGAACCGATAACGACTTTTTGGCCACTTATCT
Pseudomonas syringae	1	Pav631	Pav631|Pav631_0836	Cluster_12060.1	Type III Effector	NZ_JH951472	+	39050	39706	657	218	GTGAGAGTATCAAACACTTTACAGCCAGCGGTCGAACATACTACTCAAGCAACTATAGGGGGATGCTCCAGCTCCACAGCTTCACGCATCAAAGAGATACCTTTCAAGCAAGCAGATGAGCTGGCAAGGGTCGGCGATCAACGAGCGGCCTGCGTTGTGTTAACCGCAGCGTGGTTGGACCGCGTCCGCCATCACTCACAACCGGCCGAAGCACGTATCGATCATATGCGACATAGAGCGACCCTGGAACAAGTTGCTGAGCGTCAGCAGACGTACCGTAATCATGAAATAAATAATCCTCGTACTCCGTACGAAATATTATTCTCTCCCACCTTCCGAGATTATTCATTGCGTCTCAGTGATGCTCGCATTCTTGATGTTATGAGCGATGAAGAACAA…	MRVSNTLQPAVEHTTQATIGGCSSSTASRIKEIPFKQADELARVGDQRAACVVLTAAWLDRVRHHSQPAEARIDHMRHRATLEQVAERQQTYRNHEINNPRTPYEILFSPTFRDYSLRLSDARILDVMSDEEQAMGSMANTLRDPNSSHVLVIVRMNGDNHAIATHCTGNKLHVFDPNHGEYSFKADTSTVEENMRDIIQAYSSRFPVPEIHILPVRS	26	+	38993	39024	CGGAACTGATAGAAGGTCTCGACCACTCAGTG
Pseudomonas syringae	1	Pav631	Pav631|Pav631_0837	Cluster_452.1	Type III Effector	NZ_JH951473	+	254	6136	5883	1960	ATGGTCAAGGTTACCTCTTCCGGATTTACTGCCAACCCTCTCTCTCATCATGCGGACAGTGTCTCCCCCGCGAACAGCCCCCCTCAGTTACCGGAGCCTGTGCCTCTGGTTGATCTAAGCGAGTCGTCCCGCAAGGGCGGTATGCGAAATCGGCCGCATGCCAGTTTGAACAGTCAGGTGCTCGGACTGCAAGCGGTGCCGTCGCAACGCGGAAAGCATGTTCGTGTCAGAAGTCATGCCGATGGCGAGAGTGTCATTAACGCCTGGCTGGCAAAGCGACCCTCGGTTCAAAGCGAAACCAGCCTTGGTAACGATGGCAAGCTGGTGCGTTATAACGCTGTGAGTCATGAACCGCTGGCGCCGCGCAATGAGGCGTTTTTCACCTCTGTGCCGGGGATG…	MVKVTSSGFTANPLSHHADSVSPANSPPQLPEPVPLVDLSESSRKGGMRNRPHASLNSQVLGLQAVPSQRGKHVRVRSHADGESVINAWLAKRPSVQSETSLGNDGKLVRYNAVSHEPLAPRNEAFFTSVPGMLMAVLTVHPEMEHGISGDITADAVAARLAEPPIGLLTGVWQSSHDRAYLERGGVVHTANMEERWAPLTLPGMDPREPLRMTGLQADGGVYLHNGSQLWRLTDTAAESVITENLPEGAAVRIGAGGEVHGLHEGALHSNGISRPIELWRPKAGAPGSEQSPARPVDLLPLPGGTAAMILDDKGRVYQADLKGTGAVEAHRLKLPADFAQGKGWAVTAMGLSRDETVHLMLQDQNGRRMSLQRAPGEALFRPAYLLDRPLLLLYTEGL…	170	+	53	84	CGGAACCGATCCGGTTGCCTGACCACTCAATC
Pseudomonas syringae	1	Pav631	Pav631|Pav631_1303	Cluster_3994.1	Type III Effector	NZ_JH951486	+	67911	68963	1053	350	ATGTATATCCAGCAATCTGGCGCCCAATCAGGGGTTGCCGCTAAGACGCAACACGATAAGCCCTCGTCATTGTCCGGACTCGCCCCCGGTTCGTCGGATGCGTTCGCCCGTTTTCATCCCGAAACGGCGGGCGCCTTTGTCCCATTGGAGGGGCATGAAGAGGTCTTTTTCGATGCGCGCTCTTCCTTTTCGTCGGTCGATGCCGCTGATCTTCCCAGTCCCGAGCAGGTACAACCCCAGCTTCATTCGTTGCGTACCCTGCTACCGGATCTGATGGTCTCTATCGCCTCATTACGTGACGGCACCACGCAATACATCAAGACCAGAATCAAGGATATGGCGGACAACAGCGTAGGCGCGACTGCGAACATCGAAGCCAAAAGAAAGATTGCCCAAGAG…	MYIQQSGAQSGVAAKTQHDKPSSLSGLAPGSSDAFARFHPETAGAFVPLEGHEEVFFDARSSFSSVDAADLPSPEQVQPQLHSLRTLLPDLMVSIASLRDGTTQYIKTRIKDMADNSVGATANIEAKRKIAQEHGCQLVHPFHQSKFLFEKTIDDRAFAADYGRAGGNGHACLGLSVNWCQSRAKGQSDEAFFYKLEDYRGDALLPRVMGFQHIEQQAYSNKMQNAAPMLLDTLPKLGMTLGKGLGRAQHAHYAVALENLDRDLKALLQPGKDQMLLFLSDSHAMALHQDSQGCLHFFDPLFGVVQADSFSNMSHFLADVFKRDVGTHWRGTEQRLQLSEMVPRADFHLR	525	+	67356	67386	GGGAACCGCATCACGTCTTGAACCACAGAAG
Pseudomonas syringae	1	Pav631	Pav631|Pav631_1306	Cluster_4528.1	Type III secretion related protein	NZ_JH951486	-	72117	73364	1248	415	ATGAGCATCGGCATTACACCCAGCCCGCAACAGACCACCACGCCACTCGATTTTTCGGCTCTAAGCGGCAAGAGTCCTCAACCAAACACGTTCGGCGAGCAGAACACTCAGCAAGCGATTGACCCGAGTGCATTGTTGTTCGGCAGCGACAAACAGAAAGACGTCAACTTCGGCACGCCCGACAGCACCGTCCAGAATCCACAGGACGCCAGCAAGACCAACGACAGCCAATCCAACATCGCAAAATTGATCAGCGCATTGATCATGTCGTTGCTGCAGATGCTCACCAACTCCAATAAAAAGCAGGATGCCAATCAGGAGCAGCCTGATAGCCAGGCTCCTTTCCAGAACAACGGCGGGCTCGGCACACCGTCGGCCGATAGCGGGGGCGGCGGTACA…	MSIGITPSPQQTTTPLDFSALSGKSPQPNTFGEQNTQQAIDPSALLFGSDKQKDVNFGTPDSTVQNPQDASKTNDSQSNIAKLISALIMSLLQMLTNSNKKQDANQEQPDSQAPFQNNGGLGTPSADSGGGGTPDATGGGGGDTPSATGGGGGGGGDTPTATGGGGGGDTPTATGGGDGGVTPQITPQLANPGRTPGTTGSVADTAGSNDQAGKINVVRDTIKVGAGEVFDGHGATYTADKSMGNGDQEENQKPMFELAEGATLKNVNLGENEVDGIHVNAKNAQEVTIDNVHAQNVGEDMITVKGEGGAAVTNLNIKNSSAKGADDKVVQLNANTHLKIDNFKADDFGTMVRTNGGKQFDDMSIELNGIEANHGKFALVKSDSDDLKLATGNIAMAEV…	122	-	73486	73516	GGGAACCGGTCGCGGCGCTTTGCCACTCACT
Pseudomonas syringae	1	Pav631	Pav631|Pav631_1309	Cluster_23960.1	Type III secretion related protein	NZ_JH951486	+	76428	76823	396	131	ATGACGATGAAACCTCAGTCACCGGATTTCGCCCGCTTCATCAATTCTCTGGGCGCCCAGCTCGGCACGTCACTGACCTTGCAGAACGGCGTATGCGCCCTTTATGACGGTCAGAACAACGAAGCGGCGATCATTGAATTGCCCGAGCACAGCGAGATGGTCATCTTTCATTGTCGCATCGGCCGTTGCCCGGAGCGTGCCACCGATTTGCAGCAGTTGTTGAGCCTCAACTTTGACGTAGCGCGCTTGCACGGCTGCTGGTTTGCGGTCGATCAGGGCGATGTGCGTTTGTGTGCTCAGCGTGAACTGGCATCGTTTGATGAGCCGGCCTTCTGCGACGTGACTCGCGGGTTCATTTCTCAGGCACGTGAAGCGCGCGCTTTTTTACAGGCTTGA	MTMKPQSPDFARFINSLGAQLGTSLTLQNGVCALYDGQNNEAAIIELPEHSEMVIFHCRIGRCPERATDLQQLLSLNFDVARLHGCWFAVDQGDVRLCAQRELASFDEPAFCDVTRGFISQAREARAFLQA	37	+	76360	76391	TGGAACCGACTTGATCCTGTAACCACACATTG
Pseudomonas syringae	1	Pav631	Pav631|Pav631_1314	Cluster_2333.1	Type III secretion related protein	NZ_JH951486	+	87377	87718	342	113	ATGGTCGCATTTTCAAGCCTTACCTCCAAGCTCACCAACCTCGGTAACAGCGCAGTTGGCGGTGTCGGCGGTGCATTGCAGGGTGTCAACACGGTTGCTTCCAACGCTTCGCTTCAGAAAAACATTCTCTCGGGCACCGGCGACAGCCTGTCGGTTGATGCACAAGCCAAGGCCAGCAAAGAGTCGGACGCCAACGGCGCGAAGCTGATCGCGATGCAGGCTCAGGAAACCATGAAGAAGCAAACCATGGACGTGCTCAACGCCATCCAGGCTGGCAAGGAAGACTCTTCCAACAAGAAAATCAGTGCCACAGCGACTAACGCTAAAGGTATCAGTTACTAA	MVAFSSLTSKLTNLGNSAVGGVGGALQGVNTVASNASLQKNILSGTGDSLSVDAQAKASKESDANGAKLIAMQAQETMKKQTMDVLNAIQAGKEDSSNKKISATATNAKGISY	45	+	87300	87332	TGGAACTGATTTACAGGTTGGCGCCACCTAGTG
Pseudomonas syringae	1	Pav631	Pav631|Pav631_1320	Cluster_49085.1	Type III secretion related protein	NZ_JH951486	+	91323	91547	225	74	ATGATCAGTTTCAACAGCTTGCAACGCCATCTCGACAACTCGGTGAGCCGCGCTCACACCAACATGGACCAGGCAGCGATGGAAGCCTCCGAGAGTGGCACCGTCGAAGACCTGCAGGCATTCAATGATGCCCAGCAGCAGGTCGATGTCGCCGGTATTGCCGTCAATGAATGCCTGCGTGCCAAGCACGGTATCAATAAAGCAGTCATCGATGGAATTCAGTGA	MISFNSLQRHLDNSVSRAHTNMDQAAMEASESGTVEDLQAFNDAQQQVDVAGIAVNECLRAKHGINKAVIDGIQ	30	+	91261	91293	TGGAACCGCTCGGCGGGTTTGCTCCACTCAAGG
Pseudomonas syringae	1	Pav631	Pav631|Pav631_1335	Cluster_4852.1	Type III secretion related protein	NZ_JH951486	-	106273	107379	1107	368	ATGAAAATCGTCGCTCCGCCTATAATGCGAATACTTCCGGTCGCGCCGACCCGCGTCGTGACGCCTGCTGCGCAGCCACTTCCCAACGCTGATCTGCACAATTCAGGGACTTCGCCACAACAGGTTTCGCGCTTCGCGGCCGCGCTCATCCAGCACAGACGCATCCTCATTCAGCGCGACCTGATCGCCAGCAACAATGCCTTGCAGTCGCGAGCGGTGAAGCTCGGTGAGCTTTATCAACTGCTGATGACCGATCAGGACACCGGGCTGGATAACGCGGCCAGGGTATTGCGCAAAAAGCTCATGCAGGACGACTCGTCCTCAGATCTGAAACAGGTTCTGGATTACACCGACGGTGATGCCGCCAAGGCTCATGTGGTGTTGCAAGCCGCCAGGAAA…	MKIVAPPIMRILPVAPTRVVTPAAQPLPNADLHNSGTSPQQVSRFAAALIQHRRILIQRDLIASNNALQSRAVKLGELYQLLMTDQDTGLDNAARVLRKKLMQDDSSSDLKQVLDYTDGDAAKAHVVLQAARKQAEADGEMGEHVVLTQQLKQLRRKYGPRARAGINSAKAFARPNIDNKRRVALRNLYSVAVSGQPNITGLIEALLGEQQEAGQFNIDLRDMRTAIADDLSAMTPSASHEQLRTLMHGLNTARHVTTLLKGCEHLLGRMRNKNPDLTVDPPAFLKHLLTLTANGMNVNQTLQLTQHIGGKQLKHQLAFLNGLRPMLLQLPILLWRDMKSRQTALSNLLILMAELTTQEQKQLYGGLV	27	-	107406	107438	GGGAACTGATCCGGGACCGTGACCCACTCAGCG
Pseudomonas syringae	1	Pav631	Pav631|Pav631_2604	Cluster_4422.1	Type III secretion related protein	NZ_JH951524	+	82341	83309	969	322	ATGGGTGTTTCACCTATTCGTAACTCAAACTCCCTACCGATCGATTTTTCGTCGTTGAGCGCAAAGAGTGGCGGGCAAAACGGGCTGGGCAGCGGAGGCAATTCGACCATCGACCCGAGTACATTGTTGTTCGGCAATCAAGGGCAGACGCAGGTCAATTTCGCTCCGCCCAACAGCACGGACTCGTCAACCAGCGGTGTGAATGCGGCGTCAGGCAACAGTGAGTCCGGACTGGTCGAGCAAATCATGAGCCTGCTGAAACAATTGATGCAGATGCTGATGCAAAACAACAATGCTTCCGGTAACCCTCAGGCGGATTCGTCAACGCCAGGCGTCGGCAGTGGCAACAGCGTCGGCGGCGGCGATACGGGAAGCAGTCTCGCAAGCGGCGACGGTGGC…	MGVSPIRNSNSLPIDFSSLSAKSGGQNGLGSGGNSTIDPSTLLFGNQGQTQVNFAPPNSTDSSTSGVNAASGNSESGLVEQIMSLLKQLMQMLMQNNNASGNPQADSSTPGVGSGNSVGGGDTGSSLASGDGGDETSGVGNGGLGDAGSTPITSAADGVPSDTSLTGSGGLHLPQQLEQYRGDIMDAAKATGMPPSVIAGQIWAESRGQLNAATTNVNGKADAGLMQVNADTFKSLQQQNPGLLGNDVNDSHTNIMAGALYLRDQNKEFGDMGAALRAYNSGPDKVNKADLSDTGGVGGSSYPADVLNFAKIIESGQGNLPA	88	+	82216	82247	GGGAACCGAGTCACTCAGGGAACCACTCAGTT
Pseudomonas syringae	1	Pav631	Pav631|Pav631_2946	Cluster_907.1	Type III Effector	NZ_JH951539	-	17456	19111	1656	551	ATGGTGGGTATTAATAGAGCGGGACCATCGGGCGCTTATTTTGGTGGCCACACAGACCCCGAGCCAGTATCGGGGCAAGCACACGGTTCCAGCAGCAGCGCCAACTCTTCGAACAGTCCGCAGGTTCAGCCGCGACCCTCGAATACTCCCCCGTCGAACGCGCCCGCACCGCCGCCAACCGGACGTGAGAGGCTTTCACGATCCACGGCGCTGTCGGGCCAAACCAGGGAGTGGCTGGAGCAGGGTATGCCTACAGCGGAGGATGCCAGCGTGCGTCGTAGGCCACAGGTGCCTGCCGATGCCGCAACGCCGCGTGCAGAGGCAAGACGCACACCGGAGGCAACTGCCGATGCCAGCGCACCGCGTAGAGGGGCGGTTGCACACGCCAATAGTATCGTT…	MVGINRAGPSGAYFGGHTDPEPVSGQAHGSSSSANSSNSPQVQPRPSNTPPSNAPAPPPTGRERLSRSTALSGQTREWLEQGMPTAEDASVRRRPQVPADAATPRAEARRTPEATADASAPRRGAVAHANSIVQQLVSEGADISHTRNMLRNAMNGDAVAFSRVEQNIFRQHFPNMPMHGISRDSELAIELRGALRRAVHQQAASAPVRSPTPTPASPAASSSGSSQRSLFGRFARLMAPNQGRSSNTAASQTPVDRSPPRVNQRPIRVDRAAMRNRGNDEADAALRGLVRQGVNLEHLRTALERHVMQRLPIPRDIGSALQNVGINPSIDSGDTLVQHPLLNLNLALNRMQGLRPSAERAPRSAVPVVPPTASRRPDGTRATRVMPEREDYENNVAYG…	54	-	19165	19197	TGGAACGCTTTCCAACTCTGTTGCCACATAGCG
Pseudomonas syringae	1	Pav631	Pav631|Pav631_3097	Cluster_828.1	Type III Effector	NZ_JH951543	-	43	2793	2751	916	ATGCCATCGCAGATAACACGCTCCTCTTATTCATCCTTGCCGGATGCCTCTCACGCTTCTTCCGATGCCGCAAGCAGCCTCGAGCAATCGCCGCAGCAGGTTCGCACCAAGGCCTTTGTTGCATCTGGCAAACTGGACGTGGCTTTTGGCAGCAGGTCTACTGCGCCGGCGCAGGATTCTGTGCATCTGCTCGCGACTTTTCGGCGCGAGCTGGCGAAAAAGAATCCGTCTTATCCCGCGGTTGCCCAACTTGGCCAAGAGCTTGCCGACGCAGCGATGACCGAGCAGGGCTGGCACCAGCTCGCAAATGGGGATCAGCAGCAGGCGCTGAAAGAGGCGTTTGATGATTGCACGCGGCAGTTGGCGGACACGCCTGAGTCCCACGCGTCTCATGCGCCT…	MPSQITRSSYSSLPDASHASSDAASSLEQSPQQVRTKAFVASGKLDVAFGSRSTAPAQDSVHLLATFRRELAKKNPSYPAVAQLGQELADAAMTEQGWHQLANGDQQQALKEAFDDCTRQLADTPESHASHAPLSQACEGLKTARLHQSVALFTGKSHIRARGVADLLALIHLDPKVLAEKPEGTTPYASFGSFIRTAKDRTAELISNLRDHSEEMTGLLRPHGDTLEALETLPAALASLIEHCPDTPTQSDLRSLAEAVGELLAELRKNDLLPTSEERVSDSGESSVHSREVVEPRLTRGLALLKAGGNLVRKFDAYGAVAPMDDKKLLALLRSPAPHLSPEQMHAFLNKHAIHLTEEQRTIVSDTPLSFAREEDIEARGGMGFDEKFRLALANGSLL…	47	-	2840	2871	GGGAACCGTTATGGATCGAGCGCCACTTAGTC
Pseudomonas syringae	1	Pav631	Pav631|Pav631_3505	Cluster_9017.1	Type III Effector	NZ_JH951554	+	10778	11431	654	217	ATGATCAATAGCATCCGTGGTGGAGCGGGCACATCGGCCTATCACACCCAGCCCCAGCCATTTGATGAGTTGAAACTGAAGCCTGAAGTCATTGAGAAAAAGACGGAAAGACTTAAGGATAAGGGATATTTCAGCGTTCGTATGTCGGAGTCTACGAAAAGCTATTTGCATCAGCGAAGCACGCTCAGCAATCCCGCATGGCGAAACCAGACCGTAGGACAAGTCATCGACTTGACGGGAACCGACTATGAGCGCTCGGTCACGGCAGTGGCAAAAGACATTGCAACGAGACTTACCGGGAAACAGGAGCAACTGAAACCACAAGAGTTTCAGCTGCGGCGGGCCAAAAATCAGGGGGCGGATAAATGGCACCAGGATAAGGAGCCGAAAAAAGTCATC…	MINSIRGGAGTSAYHTQPQPFDELKLKPEVIEKKTERLKDKGYFSVRMSESTKSYLHQRSTLSNPAWRNQTVGQVIDLTGTDYERSVTAVAKDIATRLTGKQEQLKPQEFQLRRAKNQGADKWHQDKEPKKVICIATVEGRGTEFVKPSESKKLFETGEYAEMIPKNAEAIAQKTNEAKKDRFYFFAGKGITEESIPKLVHRSPHESGRAIFMARWK	92	+	10654	10686	CGGAACCGCTTTTCAACTGATTGCCACCAAGAC
Pseudomonas syringae	1	Pav631	Pav631|Pav631_4022	Cluster_3690.1	NA	NZ_JH951572	-	67672	69618	1947	648	ATGAGTGGAATTAGCAGCTACTTCCGGCACACCCCCACGCAGCAGATCGAGCACAACTTCGACGACCTTGAAAGCGGGGTCCAACGGCAGGCGCCTGCGGTGGGTGATCGACTGCATCGTGTCGGCCAGAGCCTGCTCGGTATCAGCGGAAAATTGCTGTCCGACAGCATGTCCAACCTGCCATCCATGCGTTCGCTCGGTGCCATGGCCGGGCATGGCGTGCAGCAGCTAATCACCTGTGGCGGCCCGACTTTTGCTCGGGAACAAGTGCTCATGCACGCGTACCACGCGATGCTGCCGGTGCTCGCCGCCGAAGCCAAATGGGCGCTGCTCGGCACGCAAGGCGTGATCTCCCTGGCCAAGATCGGTGCGAATCTTTACCGGCAGACGCGCATGGAG…	MSGISSYFRHTPTQQIEHNFDDLESGVQRQAPAVGDRLHRVGQSLLGISGKLLSDSMSNLPSMRSLGAMAGHGVQQLITCGGPTFAREQVLMHAYHAMLPVLAAEAKWALLGTQGVISLAKIGANLYRQTRMERLPESDVAVRGHFGLSQQQWDAKGEDEQNQLRAQHSTDSRNVTRNQVIAEAAFLVMSSLSLAKGDGAVAARVLATQMRNIIYAGSRESLQATICLTGSKHGNASHGVNESNMATNGWTYAAMTLAAGYLQDTVISNVLPKGQSVSGAHLNGADGKPLTGYALNNAVNMVAGVRALANSAIEFIDAYRGKHYDLKQVGDEQKLQEFGKKMVPMKDYERLLDHSIARLSWNNVSNAGVLALQQAAEGIGKENLPPSVMQFLGNAGTAA…	1613	-	71231	71262	TGGAACTGAAGCCTCAATACAGCCACACATCT
Pseudomonas syringae	1	Pav631	Pav631|Pav631_4318	Cluster_2093.1	Type III Effector	NZ_JH951589	+	6913	8256	1344	447	ATGCATCGTCCTATCACCGCAGGCCATACCACCTCACGTCTCATCCTAGATCAGTCAAAACAAATATCACGTACCCCATCGGAAAGTAGCGCGCAATCAGCACTTTCTCAGCAAGCAAGCATGAGCAGCCCAGTTTTGGAGCGGTCGAAAAGTGCGCCAACGTTATTGACTGCGGCACAGCGCACGATGCTTGCACAAGTGGGCGCATGCAACGCTCATCTGACCTCAGACGAAAACATGGCCATCAACGAACTGAGATTACACAAGCCCCGGTTACCTAAGGATACGTGGTTTTTCACTGATCCTAACAAGGACCCGGATGATGTCGTGACCTACACCTTGGGCAAGCAATTGCAGGCTGAGGGCTTTGTACACATCACGGACGTAGTGGCAACACTG…	MHRPITAGHTTSRLILDQSKQISRTPSESSAQSALSQQASMSSPVLERSKSAPTLLTAAQRTMLAQVGACNAHLTSDENMAINELRLHKPRLPKDTWFFTDPNKDPDDVVTYTLGKQLQAEGFVHITDVVATLGDAEVRSQRAEMAKGVFNKLELHDVHVSRGRDYAMNSLQSKEHAKFLLEGHALRAGPGEIHRDSLQDMSRRLARAPHGVGIVVIAGMSDINALITTCPDMVRERVDDITIMGGVEPLKDADGFVQPDARAYNNATDMDAARSLYRKAQELGIPLRIVTKEAAYKTAVSPSFYEGIAGSGHPVGHYLRDVQKSALKGLWEGIQAGLLPGLDDSWFFRTFMPNAQIEVAQLDKNKESSFEDIWPKVTKLNLYDPLTLLASVPGAAKLL…	28	+	6853	6885	TGAAACCGAAACGGCGTTGCTTGCCACACAGCA
Pseudomonas syringae	1	Pav631	Pav631|Pav631_5210	Cluster_828.2	Type III Effector	NZ_JH951637	+	5642	7948	2307	768	ATGAATCCAGCTCAGATCACGCGCTTGTCTCAATCATTCCTGCCGAGTATTTCCCCTGCGTCCTTCGAAGCCGAGAGCAGCCATGCGCAATCGCCGCAGCAGACTCGTACCCATGCGTTCGTCGCCTCCGGTGAATTGAACGCCGCATTCGGGCGCACTTCCACCTCGCCGACGCAAGATTTCACAAGGCTGTTGGGTGCAGTGCAGCGTGAACTGGAGAGTGAGAGTACATCGTTTCCTGCTGTTGCCGAACTCGCCAATCAGCTTGCCGAGGCTGCGATGGGCGAGCATTGGCCGGGGCACGATGAGCAGCAGGTGCTCAAAGGGGTGATTGACCGCTGCACAAGCCAGCTGGCACATACTCCCGTGTCCCATCCTTCTCGTGATGCATTGTCTCAG…	MNPAQITRLSQSFLPSISPASFEAESSHAQSPQQTRTHAFVASGELNAAFGRTSTSPTQDFTRLLGAVQRELESESTSFPAVAELANQLAEAAMGEHWPGHDEQQVLKGVIDRCTSQLAHTPVSHPSRDALSQVCESLKTARLHQSISHMLGESHAPVRGVPDLLALIHIDPKVLADKPVSMPSHVKFGSFICLARARAAQLSESLNSNSGDVAHLLHPHADTLLGLEKLPEALAALTENCPDTSTQDDLRALAEEAGGLLQQLRSTGLLPRSGEISGESAETLVPSCEVVEPKLTLGQALLKAGGDGPLDGQRVHLEGLRHAPTHVASSDSGSRAPARAAGDSQKAAGLYAEKKRTNWTHATGVAGKIAHKIESLLGMRDAQSRVQAFVAFMADGKGK…	701	+	4909	4941	TGGAACCGAAGCGGTCAGGTTGGCCACTCAGTG
Pseudomonas avellanae	1	PavICMP9749	PavICMP9749|ALP32_00157	Cluster_4852.1	Type III secretion related protein	PavICMP9749_Contig_118	+	6373	7479	1107	368	ATGAAAATCGTCGCTCCGCCTATAATGCGAATACTTCCGGTCGCGCCGACCCGCGTCGTGACGCCTGCTGCGCAGCCACTTCCCAACGCTGATCTGCACAATTCAGGGACTTCGCCACAACAGGTTTCGCGCTTCGCGGCCGCGCTCATCCAGCACAGACGCATCCTCATTCAGCGCGACCTGATCGCCAGCAACAATGCCTTGCAGTCGCGAGCGGTGAAGCTCGGTGAGCTTTATCAACTGCTGATGACCGATCAGGACACCGGGCTGGATAACGCGGCCAGGGTATTGCGCAAAAAGCTCATGCAGGACGACTCGTCCTCAGATCTGAAACAGGTTCTGGATTACACCGACGGTGATGCCGCCAAGGCTCATGTGGTGTTGCAAGCCGCCAGGAAA…	MKIVAPPIMRILPVAPTRVVTPAAQPLPNADLHNSGTSPQQVSRFAAALIQHRRILIQRDLIASNNALQSRAVKLGELYQLLMTDQDTGLDNAARVLRKKLMQDDSSSDLKQVLDYTDGDAAKAHVVLQAARKQAEADGEMGEHVVLTQQLKQLRRKYGPRARAGINSAKAFARPNIDNKRRVALRNLYSVAVSGQPNITGLIEALLGEQQEAGQFNIDLRDMRTAIADDLSAMTPSASHEQLRTLMHGLNTARHVTTLLKGCEHLLGRMRNKNPDLTVDPPAFLKHLLTLTANGMNVNQTLQLTQHIGGKQLKHQLAFLNGLRPMLLQLPILLWRDMKSRQTALSNLLILMAELTTQEQKQLYGGLV	27	+	6314	6346	GGGAACTGATCCGGGACCGTGACCCACTCAGCG
Pseudomonas avellanae	1	PavICMP9749	PavICMP9749|ALP32_00162	Cluster_3403.1	Type III secretion related protein	PavICMP9749_Contig_118	+	12323	12892	570	189	ATGACCGCACCGATCAAAACCCCGGCCAAAGCGCCACCAGCCCCCCAGCGCTCTGCGCCTGTCGAGCGGCCAGCCACAACTCTCAGTGAAAAACCATTCGGTGAAAAACGCCCTGCATTCGGCGGCTTGGGCCGTGGCGACATACAGGCCAGCCGTTCGGCGCTGAGCAAGGCGCTGCAAGACACCCCGGTGAGTGCCGACGGCATGTTCTTTTCGCAACTGCTGGTGCCGCCCGTAAGTGCCGAACCTGATCAGCAAGGCTTTGGCGGTGGCGGTATAGCCTTTCCGGTGCGCGCAGAACAAGTGCCGACCCAACTGATCGACGAGCTGGCGCAGCGCCTGCCGGATCAGCCTGACGGCCCCCTCAGTTTCACCCTGATGATGCCCAACCTGGGCAGC…	MTAPIKTPAKAPPAPQRSAPVERPATTLSEKPFGEKRPAFGGLGRGDIQASRSALSKALQDTPVSADGMFFSQLLVPPVSAEPDQQGFGGGGIAFPVRAEQVPTQLIDELAQRLPDQPDGPLSFTLMMPNLGSVRVNANKTENRWSVQLGFARRDVLKRLSAHTGACRDSLSQALGQDVELDMHEDLSA	5977	+	6314	6346	GGGAACTGATCCGGGACCGTGACCCACTCAGCG
Pseudomonas avellanae	1	PavICMP9749	PavICMP9749|ALP32_00866	Cluster_16605.1	Type III Effector	PavICMP9749_Contig_192	-	111	632	522	173	ATGATGATGAGAATACAAGGTGGTACGTCTTTTAGCATTCAACAGAACACAACGTTTGAGCATAACCCAGCTCAAGAGCAAGGGAGGGCTTCTTTCGGCGAGGAAAGGGTTTCAATCAGCTCGCCTGTCGGCTCCCAAGCATCAGTGTCAACGGAACCCGCTGAAAACGCACGAGTTATGAGCGTCGTGCTGAGCCCACAAAGGCCAAATGTAAAGAAAACAGATCTTATTCCAGGCGATATTTTGCTTCTGATCGATGAGCCACATGATACCGAGAAACTGCATAAAATTATTATTGCTGGCCAAAAACTTGAAGGTCTGTCTATGCGGAGGAATAATATAGGTAAAGCCAGTGCGGTTCACGCAATATTGTGGACTCGAAATCCCCAAAATCCAGTT…	MMMRIQGGTSFSIQQNTTFEHNPAQEQGRASFGEERVSISSPVGSQASVSTEPAENARVMSVVLSPQRPNVKKTDLIPGDILLLIDEPHDTEKLHKIIIAGQKLEGLSMRRNNIGKASAVHAILWTRNPQNPVSTERGGKGESEVVEMRGGGIMDTALRKGLYQVYLLALIEN	132	-	764	795	TGGAACCGGTCGAGGGGTTCTGACCACATAAA
Pseudomonas avellanae	1	PavICMP9749	PavICMP9749|ALP32_01387	Cluster_49085.1	Type III secretion related protein	PavICMP9749_Contig_257	-	3371	3595	225	74	ATGATCAGTTTCAACAGCTTGCAACGCCATCTCGACAACTCGGTGAGCCGCGCTCACACCAACATGGACCAGGCAGCGATGGAAGCCTCCGAGAGTGGCACCGTCGAAGACCTGCAGGCATTCAATGATGCCCAGCAGCAGGTCGATGTCGCCGGTATTGCCGTCAATGAATGCCTGCGTGCCAAGCACGGTATCAATAAAGCAGTCATCGATGGAATTCAGTGA	MISFNSLQRHLDNSVSRAHTNMDQAAMEASESGTVEDLQAFNDAQQQVDVAGIAVNECLRAKHGINKAVIDGIQ	30	-	3625	3657	TGGAACCGCTCGGCGGGTTTGCTCCACTCAAGG
Pseudomonas avellanae	1	PavICMP9749	PavICMP9749|ALP32_01390	Cluster_4702.2	Type III secretion related protein	PavICMP9749_Contig_257	-	6041	7144	1104	367	ATGCAAGCACTTAACAGCATCAGTTCGTTGCAAACCTCTGCATCATTGTTCCCCGTGTCGCTCAACAGCGATGTGAGCGCCAACACCAGCACTTCCAGCAAAGAGCTCAAGGCTGTGATCGATCAGTTGGTTCAGGCGCTGACCCAAAGTGGGCAGCTCGATGAAACCTCACCGCTCGGCAAAATGCTCGCCAAGGCCATGGCTGCGGATGGCAAGTCGGCTAACAGCATCGATGACATCACTGCATCGCTCGACAAGCTGATCCACGAAAAGCTCGGCGACAATTTCGGTGCGTCAGCCGGCATTGGCGCGGGTAGCGGTGGCGGGGCGGGTTCTGGTTCGGGTGTCGGCGGCGGTCTGAGCAGCGACGCGGGTGCCGGGGAATCCGATCTGATGAGC…	MQALNSISSLQTSASLFPVSLNSDVSANTSTSSKELKAVIDQLVQALTQSGQLDETSPLGKMLAKAMAADGKSANSIDDITASLDKLIHEKLGDNFGASAGIGAGSGGGAGSGSGVGGGLSSDAGAGESDLMSQVLNGLGKAVLDDLLTPSGEGGTTFSSDDMPTLEKVAQFMDDNKAQFPTRDGGSWMNELKEDNGLDAQETAQFRSALDVIGQQLGQQQGDASGVTSGGGLGSPVSDTSLGDPAIDANTGPATNGNGSVDVGQLIGQLIDRGLQSVSSGGGLGTPVDNSTQPAGGTPAANPTGNVSNQDLGQLLSGLLQRGLEETIKDAGGNAGADLQSSAAQVAAQLINALLQGTNNQTNQAVA	442	-	7586	7618	TGGAACTGATTTACAGGTTGGCGCCACCTAGTG
Pseudomonas avellanae	1	PavICMP9749	PavICMP9749|ALP32_01391	Cluster_2333.1	Type III secretion related protein	PavICMP9749_Contig_257	-	7200	7541	342	113	ATGGTCGCATTTTCAAGCCTTACCTCCAAGCTCACCAACCTCGGTAACAGCGCAGTTGGCGGTGTCGGCGGTGCATTGCAGGGTGTCAACACGGTTGCTTCCAACGCTTCGCTTCAGAAAAACATTCTCTCGGGCACCGGCGACAGCCTGTCGGTTGATGCACAAGCCAAGGCCAGCAAAGAGTCGGACGCCAACGGCGCGAAGCTGATCGCGATGCAGGCTCAGGAAACCATGAAGAAGCAAACCATGGACGTGCTCAACGCCATCCAGGCTGGCAAGGAAGACTCTTCCAACAAGAAAATCAGTGCCACAGCGACTAACGCTAAAGGTATCAGTTACTAA	MVAFSSLTSKLTNLGNSAVGGVGGALQGVNTVASNASLQKNILSGTGDSLSVDAQAKASKESDANGAKLIAMQAQETMKKQTMDVLNAIQAGKEDSSNKKISATATNAKGISY	45	-	7586	7618	TGGAACTGATTTACAGGTTGGCGCCACCTAGTG
Pseudomonas avellanae	1	PavICMP9749	PavICMP9749|ALP32_01448	Cluster_3994.1	Type III Effector	PavICMP9749_Contig_27	-	8609	9661	1053	350	ATGTATATCCAGCAATCTGGCGCCCAATCAGGGGTTGCCGCTAAGACGCAACACGATAAGCCCTCGTCATTGTCCGGACTCGCCCCCGGTTCGTCGGATGCGTTCGCCCGTTTTCATCCCGAAACGGCGGGCGCCTTTGTCCCATTGGAGGGGCATGAAGAGGTCTTTTTCGATGCGCGCTCTTCCTTTTCGTCGGTCGATGCCGCTGATCTTCCCAGTCCCGAGCAGGTACAACCCCAGCTTCATTCGTTGCGTACCCTGCTACCGGATCTGATGGTCTCTATCGCCTCATTACGTGACGGCACCACGCAATACATCAAGACCAGAATCAAGGATATGGCGGACAACAGCGTAGGCGCGACTGCGAACATCGAAGCCAAAAGAAAGATTGCCCAAGAG…	MYIQQSGAQSGVAAKTQHDKPSSLSGLAPGSSDAFARFHPETAGAFVPLEGHEEVFFDARSSFSSVDAADLPSPEQVQPQLHSLRTLLPDLMVSIASLRDGTTQYIKTRIKDMADNSVGATANIEAKRKIAQEHGCQLVHPFHQSKFLFEKTIDDRAFAADYGRAGGNGHACLGLSVNWCQSRAKGQSDEAFFYKLEDYRGDALLPRVMGFQHIEQQAYSNKMQNAAPMLLDTLPKLGMTLGKGLGRAQHAHYAVALENLDRDLKALLQPGKDQMLLFLSDSHAMALHQDSQGCLHFFDPLFGVVQADSFSNMSHFLADVFKRDVGTHWRGTEQRLQLSEMVPRADFHLR	525	-	10186	10216	GGGAACCGCATCACGTCTTGAACCACAGAAG
Pseudomonas avellanae	1	PavICMP9749	PavICMP9749|ALP32_01506	Cluster_3243.1	Type III Effector	PavICMP9749_Contig_28	-	2062	3609	1548	515	TTGCTTTCACGCAAACATTCGCTCCGGACAAGCCTGACTCAGGATACAGCTGCTCAAACTTCCGTAGACCGAGATAGAATTTCCATGCACATCAACCAATCCGCCCAACAACCGCCTGGCGTTGCAATGGAGAGTTTTCGGACAGCTTCCGACGCGTCCCTTGCTTCGAGTTCTGTGCGGTCTGTCAGCACTACCTCGAGCCGCGATCTACAAGCTATTACCGATTATCTGAAACATCACGTGTTCGCTGCGCACAGGTTTTCGGTAATAGGCTCACCGGATGAGCGTGATGCCGCTCTTGCACACAACGAGCAGATCGATGCGTTGGTAGAGACACGCGCCAACCGCCTTTACTCCGGAGGGGAGACCCCCGCAACCATCGCCGAAACATTCGCCAAG…	MLSRKHSLRTSLTQDTAAQTSVDRDRISMHINQSAQQPPGVAMESFRTASDASLASSSVRSVSTTSSRDLQAITDYLKHHVFAAHRFSVIGSPDERDAALAHNEQIDALVETRANRLYSGGETPATIAETFAKAEKFDRLATTASSAFENTPFAAASVLQYMQPAINKGDWLPTPLKPLTPLISGALSGAMDQVGTKMMDRARGDLHYLSTSPDKLHDAMAASVKRHSPALGRQVVDMGIAVQTFSALNVVRTVLAPALASRPSVQGAVDFGVSTAGGLVANAGFGDRMLSVQSRDHLRGGAFVLGMKDKEPKAALSEETDWLDAYKAIKSASYSGAALNAGKRMAGLPLDVATDGLKAVRSLVSATSLTKNGLALAGGYAGVSKLQKMATKNITDPAT…	80	-	3689	3721	TGGAACCGTTAACGGCCCAGCGACTACACAGCT
Pseudomonas avellanae	1	PavICMP9749	PavICMP9749|ALP32_01783	Cluster_4422.1	Type III secretion related protein	PavICMP9749_Contig_310	-	46	1020	975	324	ATGACTATGGGTGTTTCACCTATTCGTAACTCAAACTCCCTACCGATCGATTTTTCGTCGTTGAGCGCAAAGAGTGGCGGGCAAAACGGGCTGGGCAGCGGAGGCAATTCGACCATCGACCCGAGTACATTGTTGTTCGGCAATCAAGGGCAGACGCAGGTCAATTTCGCTCCGCCCAACAGCACGGACTCGTCAACCAGCGGTGTGAATGCGGCGTCAGGCAACAGTGAGTCCGGACTGGTCGAGCAAATCATGAGCCTGCTGAAACAATTGATGCAGATGCTGATGCAAAACAACAATGCTTCCGGTAACCCTCAGGCGGATTCGTCAACGCCAGGCGTCGGCAGTGGCAACAGCGTCGGCGGCGGCGATACGGGAAGCAGTCTCGCAAGCGGCGAC…	MTMGVSPIRNSNSLPIDFSSLSAKSGGQNGLGSGGNSTIDPSTLLFGNQGQTQVNFAPPNSTDSSTSGVNAASGNSESGLVEQIMSLLKQLMQMLMQNNNASGNPQADSSTPGVGSGNSVGGGDTGSSLASGDGGDETSGVGNGGLGDAGSTPITSAADGVPSDTSLTGSGGLHLPQQLEQYRGDIMDAAKATGMPPSVIAGQIWAESRGQLNAATTNVNGKADAGLMQVNADTFKSLQQQNPGLLGNDVNDSHTNIMAGALYLRDQNKEFGDMGAALRAYNSGPDKVNKADLSDTGGVGGSSYPADVLNFAKIIESGQGNLPA	88	-	1108	1139	GGGAACCGAGTCACTCAGGGAACCACTCAGTT
Pseudomonas avellanae	1	PavICMP9749	PavICMP9749|ALP32_02518	Cluster_23027.1	NA	PavICMP9749_Contig_451	+	7020	8120	1101	366	ATGTCATATCAAAAAGCAGAACCCGCTTACTTCACAACGACCCAAAGCCCAGTAGAGGTTTATACAGAATGGGACCCGTTGGAGGAGGTTATCGTCGGAATCATGGATGATATTCGTGTCCCGGATTGGGACATCGGCCTAAAAGCAATTATCCCGAAAGAATCCAGTGATTTTTTTATGACGTACTCCGGGCGACGCTTCCCAGAGGAGTTGCTTGTTAAAGCCAGGCAAGAAGTCAACACCTTAGCGCGAATATTGGAAACTGAAGGCGTTCGCGTAAAAAGGCCCAATGAGTCAAATCACCACCAACCCATCATGACGCCGCACTTTACAACGGGCGGAACCTTTTACTCTGCCATGCCCAGAGATTGTCTTTTCGCGATCGGCAAAAAAATCATT…	MSYQKAEPAYFTTTQSPVEVYTEWDPLEEVIVGIMDDIRVPDWDIGLKAIIPKESSDFFMTYSGRRFPEELLVKARQEVNTLARILETEGVRVKRPNESNHHQPIMTPHFTTGGTFYSAMPRDCLFAIGKKIIEVPMAWRSRYFETFAFRDLLNDYFSQGAEWIAAPKPMLKDDVWQPNYDFEQELPFRSIITEVEPLFDAADFMKMGRDIIGQRSHVTNNKGIEWLRRTLGPDYRVHIYEFEEPGPMHIDTTILPLAPGRVLINKDWVPQIPDIFKDWEILNPPPSNLPDDHPLFITSKWIHTNVLMLDERTVVVEKDEEALISAFRKWGFETILCPFKHFQSFGGSFHCATLDVKRRGGLHRYI	993	+	5995	6027	TGGAACCGATAACGACTTTTTGGCCACTTATCT
Pseudomonas avellanae	1	PavICMP9749	PavICMP9749|ALP32_03611	Cluster_452.2	Type III Effector	PavICMP9749_Contig_142	-	1298	7180	5883	1960	ATGGTCAAGGTTACCTCTTCCGGATTTACTGCCAACCCTCTCTCTCATCATGCGGACAGTGTCTCCCCCGCGAACAGCCCCCCTCAGTTACCGGAGCCTGTGCCTCTGGTTGATCTAAGCGAGTCGTCCCGCAAGGGCGGTATGCGAAATCGGCCGCATGCCAGTTTGAACAGTCAGGTGCTCGGACTGCAAGCGGTGCCGTCGCAACGCGGAAAGCATGTTCGTGTCAGAAGTCATGCCGATGGCGAGAGTGTCATTAACGCCTGGCTGGCAAAGCGACCCTCGGTTCAAAGCGAAACCAGCCTTGGTAACGATGGCAAGCTGGTGCGTTATAACGCTGTGAGTCATGAACCGCTGGCGCCGCGCAATGAGGCGTTTTTCACCTCTGTGCCGGGGATG…	MVKVTSSGFTANPLSHHADSVSPANSPPQLPEPVPLVDLSESSRKGGMRNRPHASLNSQVLGLQAVPSQRGKHVRVRSHADGESVINAWLAKRPSVQSETSLGNDGKLVRYNAVSHEPLAPRNEAFFTSVPGMLMAVLTVHPEMEHGISGDITADAVAARLAEPPIGLLTGVWQSSHDRAYLERGGVVHTANMEERWAPLTLPGMDPREPLRMTGLQADGGVYLHNGSQLWRLTDTAAESVITENLPEGAAVRIGAGGEVHGLHEGALHSNGISRPIELWRPKAGAPGSEQSPARPVDLLPLPGGTAAMILDDKGRVYQADLKGTGAVEAHRLKLPADFAQGKGWAVTAMGLSRDETVHLMLQDQNGRRMSLQRAPGEALFRPAYLLDRPLLLLYTEGL…	170	-	7350	7381	CGGAACCGATCCGGTTGCCTGACCACTCAATC
Pseudomonas avellanae	1	PavICMP9749	PavICMP9749|ALP32_03740	Cluster_406.1	Type III Effector	PavICMP9749_Contig_209	-	20643	24749	4107	1368	CTGAGCCGATGGAGCCCGCTCATGACCTTAAGAATCAATACTCGTTCTGCTACCCCGGTTGTACCTCTGGAAACAGGATCTTCGTCGCAGCCGACACCACCGCCGGTCACGGCAAGACCGACTGAGCCTCCCCCCGTCGCCAATCCTGCTGCACCTAAATCAGCGCCAGGTGTTCAGCAAGCTCACGGGCTGAAGACGCGCATCGCTGGCAAGCTTTCCGAACGTCAGACCAATTTCAGTCTTGGTATTCCCGGCACCGGTCGTACTCTAAACCGGCCCCTGCGCAGCGGGATTCCGGAGGAAGGTGAGCACCTATCGAGCGAGGAGAGTCATGACCCGTTGCTAAAAGAAGCGCATGAACTGCAGCGCATGGTCGATTCGGCGCTGGCCCATCTCAAG…	MSRWSPLMTLRINTRSATPVVPLETGSSSQPTPPPVTARPTEPPPVANPAAPKSAPGVQQAHGLKTRIAGKLSERQTNFSLGIPGTGRTLNRPLRSGIPEEGEHLSSEESHDPLLKEAHELQRMVDSALAHLKAAPTSLWERPAPSTVRRITTKVFPWLKPAPLREVASNGSNAKTKAYNSQQSPETIAAAVKELSTRLDHQSKVLATATHALVAAREHLESLEQATPPTSTERLDHARARAQQADSTTRLASQQLRELTQGTEVLQLGALSEGQDQVEQKADFSQQWLGELRTRMQAVDVRFADRHAAIEIELQLKVAETRELISLDHDMTAAEHTAAHANAQLSALRAQRQETPEGSDEADRLDTAIGQTLATRSQAMQTHQQLAKRLVRVDADVAR…	272	-	25021	25052	CGGAACCGAATCGACATTTCGACCACCCATCC
Pseudomonas avellanae	1	PavICMP9749	PavICMP9749|ALP32_03844	Cluster_2413.1	Type III secretion related protein	PavICMP9749_Contig_257	-	3681	4469	789	262	TTGAACACGAAGACGCGCGTCTTCTGCTCGGCGCCTGGCTTGGGCCGCAATACTGGTCGCGACTGCGTCTGGAGTGGCCGCCCAACGAAGTGCCCGACACCCCCGGCAAAGCACCCGAAAACAAACTTCAGGCGTTATGGCAGGCCATCATGTGGCGCGTCACGGCAGCCTGAACCCGACCCAGCCCCCAGCATCAGGAATATTCCCATGCTCGCCAAACGCAGTATTGCTCTGACGGCCGCTGCGCTGCTGCCCGAACCGATCTTGCGCCGCGAAGACATCGCCGACAGCCTGCTGGCGCGCGACATCCTGGCAGACGCGCGGCAGCAGGCCACGCAGATACTGGCCCTTGAGCAAGAGAAAGCCGAGCACCTTCAACAGCAGGCACTGGCGCAGTTC…	MNTKTRVFCSAPGLGRNTGRDCVWSGRPTKCPTPPAKHPKTNFRRYGRPSCGASRQPEPDPAPSIRNIPMLAKRSIALTAAALLPEPILRREDIADSLLARDILADARQQATQILALEQEKAEHLQQQALAQFWENANAFLGELQVQREALQQQAMTAVEELLSESLRHLLDDTTLAERARALARNLAASQLNEAVATLSVHPEIAEPVAEWLADSRFSEHWQLKRDATIASGSLRLSDANGAFDIDWADLRKGLLGVEPAA	3117	-	7586	7618	TGGAACTGATTTACAGGTTGGCGCCACCTAGTG
Pseudomonas avellanae	1	PavICMP9749	PavICMP9749|ALP32_03864	Cluster_828.1	Type III Effector	PavICMP9749_Contig_270	-	27	2810	2784	927	ATCGGTACCACCAACAGTAGGGAAAAAGCCATCATGCCATCGCAGATAACACGCTCCTCTTATTCATCCTTGCCGGATGCCTCTCACGCTTCTTCCGATGCCGCAAGCAGCCTCGAGCAATCGCCGCAGCAGGTTCGCACCAAGGCCTTTGTTGCATCTGGCAAACTGGACGTGGCTTTTGGCAGCAGGTCTACTGCGCCGGCGCAGGATTCTGTGCATCTGCTCGCGACTTTTCGGCGCGAGCTGGCGAAAAAGAATCCGTCTTATCCCGCGGTTGCCCAACTTGGCCAAGAGCTTGCCGACGCAGCGATGACCGAGCAGGGCTGGCACCAGCTCGCAAATGGGGATCAGCAGCAGGCGCTGAAAGAGGCGTTTGATGATTGCACGCGGCAGTTGGCG…	MGTTNSREKAIMPSQITRSSYSSLPDASHASSDAASSLEQSPQQVRTKAFVASGKLDVAFGSRSTAPAQDSVHLLATFRRELAKKNPSYPAVAQLGQELADAAMTEQGWHQLANGDQQQALKEAFDDCTRQLADTPESHASHAPLSQACEGLKTARLHQSVALFTGKSHIRARGVADLLALIHLDPKVLAEKPEGTTPYASFGSFIRTAKDRTAELISNLRDHSEEMTGLLRPHGDTLEALETLPAALASLIEHCPDTPTQSDLRSLAEAVGELLAELRKNDLLPTSEERVSDSGESSVHSREVVEPRLTRGLALLKAGGNLVRKFDAYGAVAPMDDKKLLALLRSPAPHLSPEQMHAFLNKHAIHLTEEQRTIVSDTPLSFAREEDIEARGGMGFDEK…	14	-	2824	2855	GGGAACCGTTATGGATCGAGCGCCACTTAGTC
Pseudomonas avellanae	1	PavICMP9749	PavICMP9749|ALP32_04100	Cluster_3875.2	Type III Effector	PavICMP9749_Contig_375	-	1	1497	1497	499	ATTATGCAAATAAAGAACAGTCATCTCTCTTCAGCTTCAAGAATGGTGCAGAATACTTTTAATTCATCGCCTAAGATAGAGGCAACTAATACAATAGCAAAAAATAATGAACCCGCTGCGCTGAGCGCTACGCAAACCGCAAAGACACACGAAGGCGATTCAAAAGGCCAATCCAGCAATAACTCTAAATTGCCCTTCCGCGCCATGAGGTACGCTGCATACCTTGCAGGCAGCGCCTACCTCTACGATAAAACTGCCAATAATTTTTTTCTTTCTACCACTTCTCTGCATGATGGCAAATGTGGTTTTACCAGCGATGCCAGGCTTAACGATGCACAAGACAAAGCGCGAAAGCGCTACCAAAGCAACCATAGCAGCACTCTTGAAAATAATAACTCG…	MMQIKNSHLSSASRMVQNTFNSSPKIEATNTIAKNNEPAALSATQTAKTHEGDSKGQSSNNSKLPFRAMRYAAYLAGSAYLYDKTANNFFLSTTSLHDGKCGFTSDARLNDAQDKARKRYQSNHSSTLENNNSLLSPLRLCGENQFLTMIDYRAATKESLSDLVDTEQAHSSILKNIMCLKGELTNEEAIKKLNPEKIPKDFDLTNSEAYISKNKYSLTGVRNEETGSTGYTSRSITKPFVEKGLKHFIEDTHGEKALTPKQCMENLDNLLRKNITLNSDSQFAAGQALLVFRQVYAGEDTWGDAERIILKSHYNRGTVLQDEADKIELSRPFSEQDLAKSVFKRNTSIAGPVLYHAYIYIQEKIFKLPPDKIEDLKHKSMADLKNLPLTHVKLIDSGV…	45	-	1542	1574	TGGAACTCTACGCTTGGCGACGACCACGTATAG
Pseudomonas avellanae	1	PavICMP9749	PavICMP9749|ALP32_04208	Cluster_2594.1	Type III Effector	PavICMP9749_Contig_451	-	429	1085	657	218	ATGATCACTCCGTCTCGATATCCAGGCATCTATATCGCCCCCCTCAGTAACGAACCGACAGCAGCTCACACATTCAAAGAACAAGCAGAGGAAGCACTTGACCATATCAGCGCAGCCCCCTCTGGCGATAAGCTATTGCGAAAAATATCCACTCTTGCCAGTCAAAAAGATAGAAAAGTCACGCTAAAAGAGATTGAAATAAATAACCAGTGTTATACCGAAGCTGTTCTAAGCAGGAGGCAACTGGAAAAGTACGGACCAGAAAACTTTAACGAGAACCGGCACATTGCATCACAGCTATCACGAAAGGGGACCTTTACCAACGGTGAAGGAAGCAACGCGATTATTGGCTGGTCACCAGACAAAGCAAGCATACGCTTAAATGAGAATGGCTCACCG…	MITPSRYPGIYIAPLSNEPTAAHTFKEQAEEALDHISAAPSGDKLLRKISTLASQKDRKVTLKEIEINNQCYTEAVLSRRQLEKYGPENFNENRHIASQLSRKGTFTNGEGSNAIIGWSPDKASIRLNENGSPLHLGMDNDDKITTLAHELVHARHVLGGSSLADGGDRYNPRTGSGKEELRAVGLDKYRYSLTKKPSENSIRAEHGLPLRMKYRAHQ	181	-	1266	1298	TGGAACCGAATCCATCTCGAGGGCCACTCAAGC
Pseudomonas avellanae	1	PavICMP9749	PavICMP9749|ALP32_04288	Cluster_2333.2	Type III Effector	PavICMP9749_Contig_50	-	28866	29729	864	287	ATGAACATAACGCCGCTCACGTCAGCCGCGGGCAACGGCTCGTCCGCACAAGGCACAGACAAAATTTCCATTCCCAACTCCACGCGCATGATCAATGCCGCTTCAATCAAGTGGCTGAACAAGGTGCGTAGCGCCATCAGTGACCACATCCGCACCAGCATCGAGAAAGGGAAACTGTTCGAGTTGGCCTCCTTGGGCAGCAACATGTTCGGTGTCCCGGCTCTTTCAGCGCGCCCCTCGACGCTCCAACCTGTGTTAGCGTTTGAGGCTGACCCCAATCACGACCTGAACCTTGTCAGGGTCTATATGCAGGACAGCGCCGGCAAGCTCACTCCCTGGGACCCGACGCCCAACGCGGTCACGACGACGTCGACTCCATCAGAGCATGATGCGCAGAGC…	MNITPLTSAAGNGSSAQGTDKISIPNSTRMINAASIKWLNKVRSAISDHIRTSIEKGKLFELASLGSNMFGVPALSARPSTLQPVLAFEADPNHDLNLVRVYMQDSAGKLTPWDPTPNAVTTTSTPSEHDAQSDTASSSLPRRPPAGSVLSLLGIALDHAQRHSPRADRSAKGRPGREERNGARFNAKQTKPTKAEAHGDHQVPDPDLNRPKEAAQRVAESITSMREQKNGMQRAEGLLRAKEALQAREAARKQLLDVLEAIQSGREDSTDKKISATEKNATGINYQ	22	-	29751	29782	AGGAACTCATTACCGCGAATCGCCACTCAGCA
Pseudomonas avellanae	1	PavICMP9749	PavICMP9749|ALP32_100942	Cluster_28714.2	Type III secretion related protein	PavICMP9749_Contig_257	-	5639	6013	375	124	GTGACCATTTCCCAACTCAGCAATTTGAAAAGTGTATCGCCGGAGCTTGGGCAGAATGCTCATCAGGGGCTCGGCTCCGAGCCCGTTCAGGCGGATGTCGACCTATTCAATGCGGCGATGCGCCCCGACAGCGGGCCCGCAGCGTCGCACCTGTCCGACCGGATAGCCAGTGCGCTGTCCGAGCGGCTGGGCAGTACCGAGAAGCTTTCACAGCAGGCATTACGCCAGATGAAGAAAGTGTCGAATTCCGAAGACCCTGGAGACATCGTGCAGATGAGTCGGGCGTTGTCGCAGTGCTCGTTGCAAATGGCGTTGACGACCAAGGTCGTGAGCAAGAGCGCTCAGGCGCTCGATAAGTTGACCAACCTGCAGTAG	MTISQLSNLKSVSPELGQNAHQGLGSEPVQADVDLFNAAMRPDSGPAASHLSDRIASALSERLGSTEKLSQQALRQMKKVSNSEDPGDIVQMSRALSQCSLQMALTTKVVSKSAQALDKLTNLQ	1573	-	7586	7618	TGGAACTGATTTACAGGTTGGCGCCACCTAGTG
Pseudomonas avellanae	1	PavICMP9749	PavICMP9749|ALP32_101342	Cluster_2413.3	Type III secretion related protein	PavICMP9749_Contig_257	-	4297	4896	600	199	CTGGCGCGCCAGTCTGTTGCGACGGATCGGGTTTGGCAGTCGCGGTCGCTCAACGCTGCCGGCGCGTGCATGATGAGCCTTTCTGCCGAGGATCACTGGGTCCACTGGTGGTGTAACCCCTGGCAGTGGGCACATTCGGAGTGGCACGACCGATTCGCCAACGCTCGCGGGTTATCGGTCAGCGACTGCGATGCGCTCATGGCCAGCCGTCATGGCGTGTTTCTGCAGAGTCTGGGCATCGACCCGGTTCAGCCGCCAGCGCCCGCGGAACCGGTGCTGCGCTGGTTGGCACTGACGCCCTCGCAGCGTGAGCAGGCGCTAAGCCTGGCGCAACGCATCTGCTTCTCCCGTAACGAAAGTGACGGCCCTGAAGGTCAATGGTGCTGGGGGTTGACCAAA…	MARQSVATDRVWQSRSLNAAGACMMSLSAEDHWVHWWCNPWQWAHSEWHDRFANARGLSVSDCDALMASRHGVFLQSLGIDPVQPPAPAEPVLRWLALTPSQREQALSLAQRICFSRNESDGPEGQWCWGLTKALRPGVWLEFEHEDARLLLGAWLGPQYWSRLRLEWPPNEVPDTPGKAPENKLQALWQAIMWRVTAA	2690	-	7586	7618	TGGAACTGATTTACAGGTTGGCGCCACCTAGTG
Pseudomonas avellanae	1	PavICMP9749	PavICMP9749|ALP32_103821	Cluster_2026.2	Type III Effector	PavICMP9749_Contig_35	-	15359	16267	909	302	ATGAATATCAACCCTTCCCAAGGCACCTATGGCAGTGCCTACTCGTCGTCCCAAAATGATACATCGAAGGCCACTGGAAAAGCCCCTGCGCCCTCTTTGCTCAAACAGTTGGGCAGCTGTTTCTCGCCATGCCTTGGTTCTCAAGCCTCAAGCAGCCAACACCTGTCCGCCAGTCATGCGCAAACGCTCAGTCAGAATTACTCCAGCAACATTCCAGAGGGGACGAGCCGCACACGCCAGCCGAGAGCGCCCTCGCCACGCCTGTCAGATACGCCCATGAAGCAGGCGCTTTCCTCAATGATCGGACGCGAGCGTTTGCGGCTTCAAGGTCTTTCGGGAGGAATGTTCTCGGGCATTGACTCCGCCGATGCCATGATTGGTCGAGCGCTCACGAAGAAG…	MNINPSQGTYGSAYSSSQNDTSKATGKAPAPSLLKQLGSCFSPCLGSQASSSQHLSASHAQTLSQNYSSNIPEGTSRTRQPRAPSPRLSDTPMKQALSSMIGRERLRLQGLSGGMFSGIDSADAMIGRALTKKDSNPKAARFSDDEFLAIHLYTTCLYRPINHHLRYQHQDDVPPIVEALKSGLAKLARDPDYQVAAPLHRGIEKTMSDEEVMKRFNSGRPYRDEAFMSTSTDSVIANSLTSSVALHLQSTSAVNVSPFAINAHEKEAIIPPQTPFEVVGLKKMHSTWHVDLKEVQDNADGS	278	-	16545	16572	TGGAACCGGACGAGGCTTTTTACCACTC
Pseudomonas avellanae	1	PavICMP9749	PavICMP9749|ALP32_200066	Cluster_3690.1	NA	PavICMP9749_Contig_335	+	1804	3750	1947	648	ATGAGTGGAATTAGCAGCTACTTCCGGCACACCCCCACGCAGCAGATCGAGCACAACTTCGACGACCTTGAAAGCGGGGTCCAACGGCAGGCGCCTGCGGTGGGTGATCGACTGCATCGTGTCGGCCAGAGCCTGCTCGGTATCAGCGGAAAATTGCTGTCCGACAGCATGTCCAACCTGCCATCCATGCGTTCGCTCGGTGCCATGGCCGGGCATGGCGTGCAGCAGCTAATCACCTGTGGCGGCCCGACTTTTGCTCGGGAACAAGTGCTCATGCACGCGTACCACGCGATGCTGCCGGTGCTCGCCGCCGAAGCCAAATGGGCGCTGCTCGGCACGCAAGGCGTGATCTCCCTGGCCAAGATCGGTGCGAATCTTTACCGGCAGACGCGCATGGAG…	MSGISSYFRHTPTQQIEHNFDDLESGVQRQAPAVGDRLHRVGQSLLGISGKLLSDSMSNLPSMRSLGAMAGHGVQQLITCGGPTFAREQVLMHAYHAMLPVLAAEAKWALLGTQGVISLAKIGANLYRQTRMERLPESDVAVRGHFGLSQQQWDAKGEDEQNQLRAQHSTDSRNVTRNQVIAEAAFLVMSSLSLAKGDGAVAARVLATQMRNIIYAGSRESLQATICLTGSKHGNASHGVNESNMATNGWTYAAMTLAAGYLQDTVISNVLPKGQSVSGAHLNGADGKPLTGYALNNAVNMVAGVRALANSAIEFIDAYRGKHYDLKQVGDEQKLQEFGKKMVPMKDYERLLDHSIARLSWNNVSNAGVLALQQAAEGIGKENLPPSVMQFLGNAGTAA…	1271	+	502	533	TGGAACTGAAGCCTCAATACAGCCACACATCT
Pseudomonas avellanae	1	PavICMP9749	PavICMP9749|ALP32_200093	Cluster_12060.1	Type III Effector	PavICMP9749_Contig_17	+	2223	2879	657	218	GTGAGAGTATCAAACACTTTACAGCCAGCGGTCGAACATACTACTCAAGCAACTATAGGGGGATGCTCCAGCTCCACAGCTTCACGCATCAAAGAGATACCTTTCAAGCAAGCAGATGAGCTGGCAAGGGTCGGCGATCAACGAGCGGCCTGCGTTGTGTTAACCGCAGCGTGGTTGGACCGCGTCCGCCATCACTCACAACCGGCCGAAGCACGTATCGATCATATGCGACATAGAGCGACCCTGGAACAAGTTGCTGAGCGTCAGCAGACGTACCGTAATCATGAAATAAATAATCCTCGTACTCCGTACGAAATATTATTCTCTCCCACCTTCCGAGATTATTCATTGCGTCTCAGTGATGCTCGCATTCTTGATGTTATGAGCGATGAAGAACAA…	MRVSNTLQPAVEHTTQATIGGCSSSTASRIKEIPFKQADELARVGDQRAACVVLTAAWLDRVRHHSQPAEARIDHMRHRATLEQVAERQQTYRNHEINNPRTPYEILFSPTFRDYSLRLSDARILDVMSDEEQAMGSMANTLRDPNSSHVLVIVRMNGDNHAIATHCTGNKLHVFDPNHGEYSFKADTSTVEENMRDIIQAYSSRFPVPEIHILPVRS	26	+	2166	2197	CGGAACTGATAGAAGGTCTCGACCACTCAGTG
Pseudomonas avellanae	1	PavICMP9749	PavICMP9749|ALP32_200160	Cluster_6164.1	Type III Effector	PavICMP9749_Contig_13	+	3154	3996	843	280	ATGGGTAATATTTGTGGTACTTCCGGCTCCCATTATGTATATAGTCCGCCAGTAAGCCCTCGACATGTATCGGGTTCGTCCACACCGGTGCACAGTGTAGGCGGTCAAGGCCTAACCTCGGTGTATCAACTTTCCGCTGAGGCACGAGATGATTTTCTTGATCGCTTTGACCCAATGCGAAACCTAGGTCTGAACTCGGAAACGCCGCTTTACAGGACCACGGATACCAGCTGGCGCAATGTTATTGCGCAAGTAAGAAATCCTGACGAAGATCCGCGCATCGACCATCTGCTGACAATGGCAGAAGAAATTTACAAGGCATCAAGCACTTTTAGAAAAAGAATGAACGCAGTTGCGGGCGAAGGTGGTGTCACGATAAGGATCGTGCCAGACAGTGAG…	MGNICGTSGSHYVYSPPVSPRHVSGSSTPVHSVGGQGLTSVYQLSAEARDDFLDRFDPMRNLGLNSETPLYRTTDTSWRNVIAQVRNPDEDPRIDHLLTMAEEIYKASSTFRKRMNAVAGEGGVTIRIVPDSEIGHSFGHAATIPATRSIALTETTASNVQGRHYQSLNILLVELSNLSRANEIAEIRSSFQQGRIGQRRAAHNTERAEYGTIEDMVKYFTEARPVIESLGYGNPSMWYAAHDYGGGIVPAYRSFEDYYATALSSGHTDVYLNNYSRSDE	432	+	2690	2722	TGGAACTTCAATAGGGTGTCGTACCACTCAGCT
Pseudomonas avellanae	1	PavICMP9749	PavICMP9749|ALP32_200312	Cluster_11265.1	regulation of protein secretion	PavICMP9749_Contig_335	+	743	1807	1065	354	ATGCGCACGGATGAAACTCAGCCGACGTTGTCGAGAGTGGCGGAATTGCCCGCATTGCAAAACGCGCCAAGCCCTGCACGGAGGAAAAACGCCACGGCCGGGCAGGGGGGGCAGGCGAACGGCCCGCCGGTCATACCTGCCGACAGCGCGCCCTGGCTGGCGAAAGCCGCCACGGTGCTGGGTCGCCCGGCCGACGCTGTCAGAATGTTTTCGCGAAGCGGTTTGCTGACCCTAGAACATATCCGTCTGATGATGTTCTGCCAGGAACCGTCGCCACCTCGATGGAGTGTGCTTGGTTACCCCATCATTCCCCCTGGGGTTCCCGCGGGGCTTTGGCATGAGGCCTTGCTGCGTGCCAATACCGTCGCCATGGCGGTACAAACGTGCACCTTCGCGCTC…	MRTDETQPTLSRVAELPALQNAPSPARRKNATAGQGGQANGPPVIPADSAPWLAKAATVLGRPADAVRMFSRSGLLTLEHIRLMMFCQEPSPPRWSVLGYPIIPPGVPAGLWHEALLRANTVAMAVQTCTFALDEQGTAVLITQIPFHAYGDAQALAQALADMDELASGLATTVSAAAHVGSVGHSPPSPDMAPASPDLAQLSSRVEALATEQMGAQWHRPLLEQALPELGLPVPKAMFGSVGAFKLGKRFVELIAAPDQKSLLLSTQVSVQLKTLPQRRAALQTSFYLLTGAHCSIALAPNGASLQSRWDATGLDGKDLAAWLADFVTLAISIDRGDNAATIASGISNTEFKR	210	+	502	533	TGGAACTGAAGCCTCAATACAGCCACACATCT
Pseudomonas syringae	1	PbbICMP13291	PbbICMP13291|ALQ19_00157	Cluster_7521.1	Type III Effector	PbbICMP13291_Contig_11	+	540	1349	810	269	ATGACAAACGTCTCTGGACACATTGGAAAATACCCGAGCCTCGCTAACGTTCAGGCTGGGTCTTCGGCGTCGGTCGAAAACCAGATGCCTGATCCTGCTCAGCACAGCGATGGTCGGTGGAAACAGCTTCCGACTCAGCTATCGTCTATTGCATTGTCGAGATTTGATCAAGATATTTGCACGAATAATCACGGCATAAGCCAGCGTGCAATGTGCTTTGGCCTTTCGTTGAGCTGGATCAATATGATTCATGCAGGGAAAGACCATGCAACACCCTATGCGTCGGCAGAAAGAATGAGATTTTTGGGGTCATTCGAGGGTGTGGTGCACGCTCGTACTATTCATAACTTTTATCGAACTGAACATAAGTTTCTGTTGGAGCACTCGTCCTCAAATCCC…	MTNVSGHIGKYPSLANVQAGSSASVENQMPDPAQHSDGRWKQLPTQLSSIALSRFDQDICTNNHGISQRAMCFGLSLSWINMIHAGKDHATPYASAERMRFLGSFEGVVHARTIHNFYRTEHKFLLEHSSSNPGVSTGAMAGTESLLQAAEIKGLKLRPVLEDKSNSGLPFLIACKQSGRQIVTDEAALNSLCEAIVENRKGVLVIYSEEIAHALGFSVSPDGKSATLFDPNLGEFHTHSKALADTIENISSADGLTLVGVQIFASKMR	29	+	480	511	GGGAACCGATTCGCTTCTAAAACCACTCAATC
Pseudomonas syringae	1	PbbICMP13291	PbbICMP13291|ALQ19_00404	Cluster_4422.1	Type III secretion related protein	PbbICMP13291_Contig_124	+	89240	90214	975	324	ATGACCATGGGTGTTTCACCTATTCGTAACTCAAACTCCCTACCGATCGATTTTTCGTCGTTGAGCGCAAAGAGTGGCGGGCATAACGGGCTGGGCAGCGGAGACAATTCGACTATCGACCCGAGTACGTTGTTGTTCGGCAATCAAGGGCAGACGCAGGTCAATTTCGCTCCGCCCAACAGCACGGACTCCTCAACCAGCGGTGTGAACGCTGCGTCAGGCAATACGGCGTCCGGCCTGGTCGAGCAAATCATGAGCCTGCTGAAACAATTGATGCAGATGCTGATGCAAAACAACAATGCTCCCGGTAACCCTCAGACTGATTCGTCAACGCCAGGCGTCGGCAGTGGCAACAGCGTCGGGAGCGGCGGTACTGGAAGCAGTCTCGCAGGCAGTGAC…	MTMGVSPIRNSNSLPIDFSSLSAKSGGHNGLGSGDNSTIDPSTLLFGNQGQTQVNFAPPNSTDSSTSGVNAASGNTASGLVEQIMSLLKQLMQMLMQNNNAPGNPQTDSSTPGVGSGNSVGSGGTGSSLAGSDGGDETSGVGNGGLGDAGSTPTTSAADGVPSDTSLTGSGGLHLPQQLEQYRGDIMDAAKATGVPPSVIAGQIWAESRGQLNAATTNVNGKADAGLMQVNADTFKSLQQQNPGLLGNDVNDSHTNIMAGALYLRDQNKEFGDMGAALRAYNSGPDKVNKADLSDTGGVGGSSYPADVLNFAKIIESGQGNLPA	89	+	89120	89151	GGGAACCGAGTCACTCAGTGAACCACTCAGTT
Pseudomonas syringae	1	PbbICMP13291	PbbICMP13291|ALQ19_01122	Cluster_3432.1	Type III Effector	PbbICMP13291_Contig_156	+	46485	47387	903	300	ATGAAAATATCCGGCTCCACATCGCCTGCACACACTTCAACGAATTCCGCGCAGAAGTCCTCTTCAAAAGGGCTGCTGAGTGGTTTGGCCAAGCATTTCAAAGGGATGCTCGTTTCTGGCAACACTTCTGGTCATTCGGCGCTCGGGCATTACGCGTCATCCAGCAGCGGCTCCAAAGGCAAGGCACCGGTACGGGACGATTACAGCAACGGACCGCAAACACGCCTTAACAACACACCTCTGAAACGAGCACTGGCCCGAGAGCTTGATCGCTTTGGCTACGGTTCATCGGCGACCGAGTCTTTTGACCGCTCATTGCAGCTTAAGGATAAAAATCCAGAGCTTGGTCACCTTGATGACGACGAGTACCTCGCTTTGCGCATGTACACAACGCCGTTT…	MKISGSTSPAHTSTNSAQKSSSKGLLSGLAKHFKGMLVSGNTSGHSALGHYASSSSGSKGKAPVRDDYSNGPQTRLNNTPLKRALARELDRFGYGSSATESFDRSLQLKDKNPELGHLDDDEYLALRMYTTPFYRAVNHQLRDGKPSEDMKVVVEAMNKGLKRLAEHPDNVVKETLYRGINKVVDDKFIHKNFKLGEVYRDKTFVSATPDLSTVNATFTRHTVKSSKAKASAPVYQRSPLLEIESRSAVRVRQVSLSSAEEEGIFAPDTPFLVADKSRTDSGRWHIKLKEIDESDESSGL	516	+	45938	45969	TGGAACCGGACGAGGCTTTTTACCACTCAATG
Pseudomonas syringae	1	PbbICMP13291	PbbICMP13291|ALQ19_02470	Cluster_3243.1	Type III Effector	PbbICMP13291_Contig_398	-	2323	3786	1464	487	ATGCACATCAACCAATCCGCCCAACAACCGCCTGGCGTTGCAATGGAGAGTTTTCGGACAGCTTCCGACGCGTCCCTTGCTTCGAGTTCTGTGCGGTCTGTCAGCACTACCTCGAGCCGCGATCTACAAGCTATTACCGATTATCTGAAACATCACGTGTTCGCTGCGCACAGGTTTTCGGTAATAGGCTCACCGGATGAGCGTGATGCCGCTCTTGCACACAACGAGCAGATCGATGCGTTGGTAGAGACACGCGCCAACCGCCTTTACTCCGAAGGGGAGACCCCCGCAACCATCGCCGAAACATTCGCCAAGGCGGAAAAGTTCGACCGTTTGGCGACGACCGCATCAAGTGCTTTTGAGAACACGCCATTTGCCGCTGCCTCGGTGCTTCAGTAC…	MHINQSAQQPPGVAMESFRTASDASLASSSVRSVSTTSSRDLQAITDYLKHHVFAAHRFSVIGSPDERDAALAHNEQIDALVETRANRLYSEGETPATIAETFAKAEKFDRLATTASSAFENTPFAAASVLQYMQPAINKGDWLPTPLKPLTPLISGALSGAMDQVGTKMMDRARGDLHYLSTSPDKLHDAMAASVKRHSPALGRQVVDMGIAVQTFSALNVVRTVLAPALASRPSVQGAVDFGVSTAGGLVANAGFGDRMLSVQSRDHLRGGAFVLGMKDKEPKAALSEETDWLDAYKAIKSASYSGAALNVGKRMAGLPLDVATDGLKAVRSLVSATSLTKNGLALAGGYAGVSKLQKMATKNITDPATKAAVSQLSNLVGSVGVFAGWTTAGLATD…	164	-	3950	3982	TGGAACCGTTAACGGCCCAGCGACTACACAGCT
Pseudomonas syringae	1	PbbICMP13291	PbbICMP13291|ALQ19_02511	Cluster_12060.1	Type III Effector	PbbICMP13291_Contig_42	+	199	855	657	218	GTGAGAGTATCAAACACTTTGCAGCCAGCGGTCGAACATACTACTCAAGCAACTATAGGGGGTTGCTCCAGCTCCACAGCTTCACGCATCAAAGAGATACCTTTCAAGCAAGCAGATGAGCTGGCAAGAGTCGGCGATCAACGAGCGGCCTGCGTTGTGTTAACCGCAGCGTGGTTGGACCGCGTCCGCCATCACTCACAACCGGCCGAAGCACGTATCGATCATATGCGACATAGAGCGACCCTGGAACAAGTTGCTGAGCGTCAGCAGACGTACCGTAATCATGAAATAAATAATCCTCGTACTCCGTACGAAATATTATTCTCTCCCACCTTCCGAGATTATTCATTGCGTCTCAGTAATGCTCGCATTCTTGATATTATGAGCGATGAAGAACAA…	MRVSNTLQPAVEHTTQATIGGCSSSTASRIKEIPFKQADELARVGDQRAACVVLTAAWLDRVRHHSQPAEARIDHMRHRATLEQVAERQQTYRNHEINNPRTPYEILFSPTFRDYSLRLSNARILDIMSDEEQAMGSMANTLRDPNSSHVLVIVRMNGDNHAIATHCTGNKLHVFDPNHGEYSFKADTGTVEENMRDIIQAYSSRFPVPEIHILPVRS	26	+	142	173	CGGAACTGATAGAAGGTCTCGACCACTCAGTG
Pseudomonas syringae	1	PbbICMP13291	PbbICMP13291|ALQ19_03255	Cluster_3875.2	Type III Effector	PbbICMP13291_Contig_62	+	19513	20646	1134	377	ATGCAAATAAAGAACAGTCATCTCTATTCAGCTTCAAGAATGGTGCAGAATACTTTTAATGCCTCGCCTAAGATGGAAGCAACTAATGCAATAGCAAAAAATAATGAACCTGCTGCGCTGAGCGCTACGCAAACTGCAAAGACACACGAAGGCGATTCAAAAGGCCAATCCAGCAATAACTCTAAATTGCCCTTCCGCGCCATGAGGTACGCTGCATACCTTGCAGGCAGCGCCTACCTCTACGATAAAACTGCCAATAATTTTTTTCTTTCTACCACTTCTCTGCATGATGGCAAAGGTGGTTTTACCAGCGATGCCAGGCTTAACGATGCACAAGATAAAGCGCGAAAGCGCTACCAAAACAACCATAGCAGCACTCTTGAAAATAAGAACTCGCTT…	MQIKNSHLYSASRMVQNTFNASPKMEATNAIAKNNEPAALSATQTAKTHEGDSKGQSSNNSKLPFRAMRYAAYLAGSAYLYDKTANNFFLSTTSLHDGKGGFTSDARLNDAQDKARKRYQNNHSSTLENKNSLLSPLRLCGENQFLTMIDYRAATKIYLSDLVDTEQAHTSILKNIMCLKGELTNEEAIKKLNPEKTPKDFDLTNSEAYISKNKYSLTGVKNEETGSTGYTSRSITKPFVEKGLKHFIEATHGEKALTPKQCMETLDNLLRKSITLNSDSQFAAGQALLVFRQVYAGEDAWGDAERVILKSHYNRGTVLQDEADKIELSRPFSEQDLAKNMFKRNTSIAGPVLYHAYIYIQEKIFKLPPRQNRRFET	48	+	19433	19465	TGGAACTCTACGCTTGGCGATGACCACGTATGA
Pseudomonas syringae	1	PbbICMP13291	PbbICMP13291|ALQ19_03856	Cluster_477.1	Type III Effector	PbbICMP13291_Contig_76	-	2789	5131	2343	780	ATGCGTATATCCAGTTCTCCCTTCGTTATCGTGAACCAACCCACCCCTGGCGAACTGGCTCTGGCTGTTGAGTCGCCTCTTGCCAAAGCCTTGCCGACACCTGCGGGTGGCGGTGGGCAAGCCGGCGTGCAGTTCGGTCAGCCGGCCGGCAACACGCAAGGCGCGCCGACAGGAGCCGAGCAGACCGCGTCGTCTATCCTGGCTCTTTTGCTCCAGGGCAGTGGCGGGGCAGCTGCCAATGTCAATGTGAATAATCAGGTCCAGCCGCAACCCTGCGCAGATTCTCCTGCCGAGGCTGCACCGACTGAAGCAACTGCCCCGGCCGCTCCGGTTGAACAGGTCGCAGCTCCCACGAACACAGATGCAACCGACGCTTCCAACGCCCCCAAAGCCGCAGAC…	MRISSSPFVIVNQPTPGELALAVESPLAKALPTPAGGGGQAGVQFGQPAGNTQGAPTGAEQTASSILALLLQGSGGAAANVNVNNQVQPQPCADSPAEAAPTEATAPAAPVEQVAAPTNTDATDASNAPKAADAAFLDNSEYSSPEALKRWEPMVAHLPPEEREQAAKELNRPIAAAWMARDDGPDAGKAMDFINANPALKTAVDVAQGGGNADGKITNKDLKTFAKNMEKAADSADKDLANYTKDNPDADPQSLEMVRSAAVMRANMPLAIAADPHHAVDAADKTKVDGNVDAEDLKGLAQSNPGLSGALKQSCSTWSQPGFLGQVDEAGMSGRKKAAHSPDKMFDAKNLSEWIKKSAPTNGGQFASMLSDSATLNAVAGIDISKLDKDVFDKPKSYS…	32	-	5163	5194	TGGAACCAACTTGCACCTTCAACCACACAGTT
Pseudomonas syringae	1	PbbICMP13291	PbbICMP13291|ALQ19_03858	Cluster_4852.1	Type III secretion related protein	PbbICMP13291_Contig_76	+	6016	7122	1107	368	ATGAAAATCGTCGCTCCGCCTATCATGCGAATACTTCCGGTCGCGCCGACCCGCGTCGTGACGCCTGCTGCGCAGCCACTTCCCAATGCTGATCTGCACAATTCAGGGACTTCGCCACAACAGGTTTCGCGCTTCGCGGCCGCGCTCATCCAGCACAGACGCATCCTCATTCAGCGCGACCTGATCGCCAGCAACAATGCCTTGCAGTCGCGAGCGGTGAAGCTCGGTGAGCTTTATCAACTGCTGATGACCGATCAGGACACCGGGCTGGATAACGCGGCCAGGGTATTGCGCAAAAAGCTCATGCAGGATGACTCGTCCTCAGATCTGAAACAGGTTCTGGATTACACCGACGGTGATGCCGCCAAGGCTCATGTGGTGTTGCAAGCCGCCAGGAAG…	MKIVAPPIMRILPVAPTRVVTPAAQPLPNADLHNSGTSPQQVSRFAAALIQHRRILIQRDLIASNNALQSRAVKLGELYQLLMTDQDTGLDNAARVLRKKLMQDDSSSDLKQVLDYTDGDAAKAHVVLQAARKQAEADGEMGEHVVLTQQLKQLRRKYGPRARAGINSAKAFARPNIDNKRRVALRNLYSVAVSGQPNITGLIEALLGEQQEAGQFNIDLRDMRTAIADDLSAMTPSASHEQLRTLMHGLNTARHVTTLLKGCEHLLGRMRNKNPDLTVDPPAFLKHLLTLTANGMNVNQTLQLTQHIGGKQLKHQLAFLNGLRPMLLQLPILLWRDMKSRQTALSNLLILMAELTTQEQKQLYGGLV	27	+	5957	5989	GGGAACTGATCCGGGACCGTGACCCACTCAGCG
Pseudomonas syringae	1	PbbICMP13291	PbbICMP13291|ALQ19_03862	Cluster_3403.1	Type III secretion related protein	PbbICMP13291_Contig_76	+	12037	12606	570	189	ATGACCGCACCGATCAAAACCCCGGCCAAAGCGCCACCAGCACCCCAGCGCCCTGCGCCTGTCGAGCGGCCAGCCACAGCTCTGAGCGAAAAACCATTCGGTGAAAAACGCCTTGCATCCGGTGGCTTGGGCCGTGGCGATGTACAGACCAGCCGTTCGGTACTGAGCAAGTCGCTGCAAGACACCCCGATGAGTGCCGACGGCATGTTCTTTTCGCAACTGCTGGTGCCGCCCGTAAGTGCCGAACCTGATCAGCAAGGCTTTGGCGGGGGCGGTATAGCCTTTCCGGTACGCGCAGAACAAGTGCCGACCCAACTGATCGACGAGCTGGCGCAGCGCCTGCCGGATCAGCCTGACGGCCCCCTCAGTTTCACCCTGCTGATGCCCAACCTGGGCAGC…	MTAPIKTPAKAPPAPQRPAPVERPATALSEKPFGEKRLASGGLGRGDVQTSRSVLSKSLQDTPMSADGMFFSQLLVPPVSAEPDQQGFGGGGIAFPVRAEQVPTQLIDELAQRLPDQPDGPLSFTLLMPNLGSVRVNANKTENRWSVQLGFARRDVLKRLSAHTGACRDSLSQALGQDVELDMHEDLSA	6048	+	5957	5989	GGGAACTGATCCGGGACCGTGACCCACTCAGCG
Pseudomonas syringae	1	PbbICMP13291	PbbICMP13291|ALQ19_03869	Cluster_49085.1	Type III secretion related protein	PbbICMP13291_Contig_76	-	20140	20382	243	80	TTGCTGGAGCACCAGGACATGATCAGTTTCAACAGCTTGCAACGCCATCTCGACAACTCGGTGAGCCGTGCTCACACCAACATGGACCAGGCAGCGATGGAAGCCTCCGAGAGTGGCACCGTCGAAGACCTGCAGGCATTCAACGATGCCCAGCAGCAGGTCGATGTCGCCGGTATTGCCGTCAATGAATGCCTGCGTGCCAAGCACGGTATCAATAAAGCAGTCATCGATGGAATTCAGTGA	MLEHQDMISFNSLQRHLDNSVSRAHTNMDQAAMEASESGTVEDLQAFNDAQQQVDVAGIAVNECLRAKHGINKAVIDGIQ	12	-	20394	20426	TGGAACCGCTCGGCGGGTTTGCTCCACTCAAGG
Pseudomonas syringae	1	PbbICMP13291	PbbICMP13291|ALQ19_03871	Cluster_2413.3	Type III secretion related protein	PbbICMP13291_Contig_76	-	21076	21606	531	176	ATGATGAGCCTTTCCGCCGAGGATCACTGGGTCCACTGGTGGTGCAACCCCTGGCAGTGGGCTCATTCGCAGTGGCATGACCGATTCGCCAGCGCTCGGGGGTTGTCGGTCAGTGACTGCGATGCGCTCATGGCCAGCCGTCATGGCGTGTTTCTGCAGAGTCTGGGCATCGACCCGGCTCAGCCGCCAGCGCCCGCGGAACCGGTGCTGCGCTGGTTGGCGCTGACGCCCTCGCAGCGTGAGCAGGCGCTAAGCCTGGCGCAGTGCATCTGCTTCTCCCGTAACGAAAGCGACGGCCCTGACGGTCAATGGTGCTGGGGGTTGACCAAAGCGCTGCGCCCCGGTGTCTGGCTGGAGTTTGAACACGAGGACGCGCGTCTTCTGCTGGGCGCCTGGCTT…	MMSLSAEDHWVHWWCNPWQWAHSQWHDRFASARGLSVSDCDALMASRHGVFLQSLGIDPAQPPAPAEPVLRWLALTPSQREQALSLAQCICFSRNESDGPDGQWCWGLTKALRPGVWLEFEHEDARLLLGAWLGPQYWSRLRLEWPPNEVPDTPGKAPENKLQALWQAIMWRVTAA	2768	-	24374	24406	TGGAACCGATTCGCAGGCTGCTGCCACCTAGTG
Pseudomonas syringae	1	PbbICMP13291	PbbICMP13291|ALQ19_03873	Cluster_28714.2	Type III secretion related protein	PbbICMP13291_Contig_76	-	22418	22792	375	124	GTGACCATTTCCCAACTCAGCAATTTGAAAAGTGTATCGCCGGAGCTTGGGCAGAATGCTCATCAGGGGCTCGGCTCCGAACCCTTTCAGGCGGATGTCGACCTATTCAATGCGGCGATGCGTCCTGACAGCGGGCCCGCAGCGTCGCACCTGTCCGACCGGATAGCCAGTGCGCTGTCCGAGCGGCTGGGCAGTACCGAGAAGCTTTCACAGCAAGCATTACGCCAGATGAAGAAAGTGTCGAACACCGAAGATCCTGGAGACATCGTGCAGATGAGTCGGGCGTTGTCGCAGTGCTCGTTGCAAATGGCGTTGACGACCAAGGTCGTGAGCAAGAGCGCTCAGGCGCTCGACAAGTTGACCAACCTGCAGTAG	MTISQLSNLKSVSPELGQNAHQGLGSEPFQADVDLFNAAMRPDSGPAASHLSDRIASALSERLGSTEKLSQQALRQMKKVSNTEDPGDIVQMSRALSQCSLQMALTTKVVSKSAQALDKLTNLQ	1582	-	24374	24406	TGGAACCGATTCGCAGGCTGCTGCCACCTAGTG
Pseudomonas syringae	1	PbbICMP13291	PbbICMP13291|ALQ19_03874	Cluster_4702.2	Type III secretion related protein	PbbICMP13291_Contig_76	-	22820	23932	1113	370	ATGCAAGCACTTAACAGCATCAGTTCGTTGCAAACCTCTGCATCATTGTTCCCCGTGTCGCTCAACAGCGATGTGAGCGCCAACACCAGCACTTCCAGCAAAGAGCTCAAGGCTGTGATCGATCAGCTGGTTCAGGCGCTGACCCAAAGTGGGCAGCTCGATGAAACCTCACCGCTCGGCAAAATGCTCGCCAAGGCCATGGCTGCGGATGGCAAGTCGGCTAACAGCATCGATGACATCACTGCATCGCTCGACAAGCTGATCCACGAAAAGCTCGGCGACAATTTCGGTGCCTCTGCCGGCATCGGCGCGGGTGGCGGTGGCGGTGGCATTGGCGGGGCGGGTTCTGGTTCGGGTGTCGGTGGCGGTCTGAGCAGCGACGCGGGTGCCGGGCAATCC…	MQALNSISSLQTSASLFPVSLNSDVSANTSTSSKELKAVIDQLVQALTQSGQLDETSPLGKMLAKAMAADGKSANSIDDITASLDKLIHEKLGDNFGASAGIGAGGGGGGIGGAGSGSGVGGGLSSDAGAGQSDLMSQVLNGLGKAVLDDLLTPSGEGGTTFSSDDMPTLEKVAQFMDDNKAQFPTRDGGSWMNELKEDNGLDAQETAQFRSALDVIGQQLGQQQGDASGVTSGGGLGSPVSDSSLGNPAIDANTGPAANGNASVDVGQLIGQLIDRGLQSVSSGGGLGTPVDNSTQPAGGTPAANPTGNVSNQDLGQLLSGLLQRGLEATLQDAGNTGADLQSSAAQVAAQLINALLQGTNNQTNQAVA	442	-	24374	24406	TGGAACCGATTCGCAGGCTGCTGCCACCTAGTG
Pseudomonas syringae	1	PbbICMP13291	PbbICMP13291|ALQ19_03878	Cluster_418.1	Type III Effector	PbbICMP13291_Contig_76	+	29106	34493	5388	1795	GTGCAGTCACCATCGATCCACCGGAACACCGGAAGCATCATTCAGCCAACCGTCACCCCTGACGCACGTGCTGCAACTGATCTGCAGCAAAGAGCCGAACAACCCAGGCAACGCTCTTCGCACTCGTTGAGCAGTGTCGGCAAGCGGGCGCTGAAAAGCGTCGGTAAATTGTTCCAGAAATCCAAAGCGCCGCAGCAGAAAGCCGCCACGCCGCCCACCGCGAAAAACGTCAAAACGCCCCCGCCTGCTTCAAATGTGGCTACGCCCAGAAACAAAGCCCGCGAATCCGGTTTTTCCAACAGCAGCCCGCAAAATACCCATAGCGCACCCAAGTCGATTCTGCGTAACCACCCCAACCAGGCGAGCAGCTCGGGCGCGCAGACGCATGAAATACACCCG…	MQSPSIHRNTGSIIQPTVTPDARAATDLQQRAEQPRQRSSHSLSSVGKRALKSVGKLFQKSKAPQQKAATPPTAKNVKTPPPASNVATPRNKARESGFSNSSPQNTHSAPKSILRNHPNQASSSGAQTHEIHPEAAPRKNLRVRFDLPQDRLERSPSYLDSDNPMTDEEAVANATRQFRSPDSRLQGSDGTRISMLATDPDQPSSSGSKIGDSDGPIPPREPMLWRSNGGRFELKDEKLVRNSEPQGSIQLDAKGKPDFSTFNTPGLAPLLDSILATPKQTYLAHQSKDGVHGHQLLQANGHLLHLAQDDSSLAVIRSSNEALLIEGKKPPAVKMEREDGNIHIDTASGRKTQELPGKAHIAHITNVLLSHHGERMRVHEDRLYQFDPISTRWKIPEGL…	67	+	29008	29039	TGAAACCCGCTGGCATTGCATGCCACTCATCC
Pseudomonas syringae	1	PbbICMP13291	PbbICMP13291|ALQ19_04237	Cluster_2333.2	Type III Effector	PbbICMP13291_Contig_89	+	7416	8279	864	287	ATGAACATTACGCCGCTCACGTCAGCCGCGGGCAAGGGCTCGTCCGCACAAGGCACAGACAAAATTTCCATTCCCAACTCCACGCGCATGATCAATGCCGCGTCAATCAAGTGGTTGAACAAGGTGCGTAGCGCCATCAGTGACCACATCCGCACCAGCATCGAGAAAGGGAAACTGTTCGAGCTCGCCTCCTTGGGCAGCAACATGTTCGGTGTCCCGGCCCTTTCAGCGCGCCCCTCGACGCTCCAACCTGTGTTGGCGTTTGAGGCCGACCCCAATCACGACCTGAACCTTGTCAGGGTCTATATGCAGGACAGCGCCGGCAAGCTCACTCCCTGGGACCCGACGCCCAACGCGGTCACGACGACGTCGAATCCATCAGAGCCTGATGCGCAGAGC…	MNITPLTSAAGKGSSAQGTDKISIPNSTRMINAASIKWLNKVRSAISDHIRTSIEKGKLFELASLGSNMFGVPALSARPSTLQPVLAFEADPNHDLNLVRVYMQDSAGKLTPWDPTPNAVTTTSNPSEPDAQSDTASSSLPRRPPAGSVLSLLGIALDHAQRHSPRADRSAKGRPGREERNGARFNAKQTKPTEAEAYGDHQTPNPDLHRQKETAQCVAESINSMREQQNGMQRTEARLRAKEALQAREAARKQLLDVLEAIQAGREDSTDKKISATEKNATGINYQ	22	+	7363	7394	AGGAACTCATCACCGCGAATCGCCACTCAGCA
Pseudomonas syringae	1	PbbICMP13291	PbbICMP13291|ALQ19_04503	Cluster_12167.1	Type III Effector	PbbICMP13291_Contig_105	-	9299	9550	252	83	ATGAATCGCATTTCAACCAGCTCAGTAAATTCCAGCTTCAAATACACGGCCCCTACGAAGGAAGCGCAAAACCGCTTCGCCTCAGCGCCCGACAATTCCCCTCTAGTTGCCACCACAACATCTATCACCCAAACCCTCGTGCAGCCTGGTCGACTCGATAAAAACCACCGTCTGATGGATTCCAAAATCATCAATTTTTCAGTCGCATTTAATCTCGGCCGGACGCGCTCGATTGCTGGTGGCAGTGCATGA	MNRISTSSVNSSFKYTAPTKEAQNRFASAPDNSPLVATTTSITQTLVQPGRLDKNHRLMDSKIINFSVAFNLGRTRSIAGGSA	82	-	9632	9664	AGGAACTGCAAGCTGGTGCGGCTCCACTAAAAC
Pseudomonas syringae	1	PbbICMP13291	PbbICMP13291|ALQ19_04505	Cluster2_1015.9	metabolic process	PbbICMP13291_Contig_105	+	11963	14374	2412	804	ATGAAGCCATCAAATCAACAAGCATCGAAAAACTCAAATTTCTCGTATGAACTGTCCCCTGTACAGCAGGGTATCTGGCTCGGTCAGATAGCGGATTCGAACATACCACTGTACAACATTGGCATGAGACTGGAGATCAATGGTGATCTCGATATTCCGATGTTCGAGAAGGCTATCAATCTGGTTGCCAAGCATAACGATGCACTACGGCTTGCCTTGTTCCATGAGGGCGATATAGCCAGGCAGAGGGTGCTGCCATCTGTCGATATCAGACTCGCACTCGTCGATTTTTCAGACTACGTTGACAGTGTCGAGCGAGCGCTGGAATACCTTCAACAATCATTTTCCCGACCGTTCAATCCCTTGGAAGGCATTCTTTGGGAGGTGCAGCTCGTACGG…	MKPSNQQASKNSNFSYELSPVQQGIWLGQIADSNIPLYNIGMRLEINGDLDIPMFEKAINLVAKHNDALRLALFHEGDIARQRVLPSVDIRLALVDFSDYVDSVERALEYLQQSFSRPFNPLEGILWEVQLVRCSASHHYWLGRCHHLVMDGAGVTLFCHAVEKAYNNLLAGIDELEEAPSYSDFLIKDKAYLSSSRLERDRAFWRERYTQLPPPLLQWSGDHAVGSMCKSGHIRSTIKRDLFNALVAVATEHDLSPVAIFFAAVGAYFSRVGDAEEVIIGMPLHNRTTACQKKTIGMFSSVIPIGVRVDPNRSLLELMGDVAAELRRCYRHEHFPIAELNRALNIGHSRRKQIFDITLSFEKFDADFIFGGSPAQAIRMYSGFDQTPLSIAICDYYSD…	823	+	11109	11140	TGGAACCGATAACAAATTTTTGGCCACATACA
Pseudomonas syringae	1	PbbICMP13291	PbbICMP13291|ALQ19_04912	Cluster_406.1	Type III Effector	PbbICMP13291_Contig_198	-	3928	8034	4107	1368	CTGAGCCGATGGAGCCCGCTCATGACCTTAAGAATCAATACTCGTTCTGCTACCCCGGTTGTACCTCTGGAAACAGGCTCTTCGTCGCAGCCGGCACCGCCGCCTGTCACGGCAAGAGCGACTGAGCCTCCCCCCGTCGCCAATCCTGCGGCGCCTAAATCAGCGCCAGGTGTTCAGCAAGCACACGGGCTGAAGACGCGCATCGCTGGCAAACTTTCCGAACGTCAGACCAATTTCAGTCTTGGTATTCCCGGCACCGGTCGTACTCTCAACCGGCCCCTGCGCAGCGGGATTCCGGAGGAAGGTGAGCAGGTATCGAACGAGGAGAGTCATGATCCGTTGCTCAAGGAAGCGCATGAACTGCAGCGCATGGTGGAGTCGGCGCTGACCCATCTGAAG…	MSRWSPLMTLRINTRSATPVVPLETGSSSQPAPPPVTARATEPPPVANPAAPKSAPGVQQAHGLKTRIAGKLSERQTNFSLGIPGTGRTLNRPLRSGIPEEGEQVSNEESHDPLLKEAHELQRMVESALTHLKAAPTSLWERPAPSTVRRITTKVFPWLKPAPLREVASNGSNAKTKIKINSQQSPETIAAAVKELSTRLDHQSKVLATATHALVAAREHLESLEQATPPSSTERLDHARARVQQADSTTRLASQQLRELIQGTDVLQLGALSEGQDQVEQKAEFSQQWLSELRTRMQAVDVRFADRHTAIEIELQLKVAQTRELISLDHDMTAAEHTAAQANTQLSALRAQRQETPEGSDEADRLDTAIGQTLATRSQAMQTHQQLAKRLVRVDADVA…	256	-	8290	8321	CGGAACCGAATCCATATTTCGACCACCCATCC
Pseudomonas syringae	1	PbbICMP13291	PbbICMP13291|ALQ19_04990	Cluster_2093.1	Type III Effector	PbbICMP13291_Contig_231	+	12823	13134	312	104	ATCCAGGAGGTCGACTCAATGCATCGTCCTATCAACGCAGGCCATACCACCTCACGTCTCATCCTAGATCAGTCAAAACAAATATCACGTACTCCATCGGAAAGTAGCGCGCAATCAGCACTTTCTCAGCAAACAAGTATGAGCAGCCCAGTTTTGGAGCGGTCGAAAAGTGCGCCAGCTTTATTGACTGCGGCACAGCGCACGATGCTTGCACAAGTGGGAGCCTGTAACGCTCATCTGACCTCAGATGAAAATATGGCCATCAACGAACTGAGATCACACAAGCCCCTTTTACCTAAGGAAGGTCTGAAG	MQEVDSMHRPINAGHTTSRLILDQSKQISRTPSESSAQSALSQQTSMSSPVLERSKSAPALLTAAQRTMLAQVGACNAHLTSDENMAINELRSHKPLLPKEGLK	10	+	12781	12813	TGAAACCGAAAGGGCGTTGCTTGCCACACAGCA
Pseudomonas syringae	1	PbbICMP13291	PbbICMP13291|ALQ19_05124	Cluster_452.2	Type III Effector	PbbICMP13291_Contig_307	-	15295	21168	5874	1957	ATGGTCAAGGTTACCTCTTCCGGATTTACTGCCAACCCTCTCTCTCATCATGCGGACAGTGTTTCCCCCGCGAACAGTCCCCCTCAGTTACCGGAGCCTGTGCCTCTGGTTGATCTAAGCGAGTCGTCCCGCAAGGGCGGCATGCGAAATCGGCCGCATGCCAGTTTGAACAGTCAGATGCTCGGACTGCAAGCGGTGCCGTCGCAACGCGGAAAGCATGTTCGTGTCAGAAGTCATGCCGATGGCGAGAGTGTCATTAACGCCTGGCTGGCAAAGCGACCCTCGGTTCAAAGCGAAACCAGCCTTGGTAACGATGGCAAGCTGGTGCGTTATAACGCTGTGAGTCATGAACCGCTGGCGCCGCGCAATGAGGCGTTTTTCACCTATGTACCGGGGATG…	MVKVTSSGFTANPLSHHADSVSPANSPPQLPEPVPLVDLSESSRKGGMRNRPHASLNSQMLGLQAVPSQRGKHVRVRSHADGESVINAWLAKRPSVQSETSLGNDGKLVRYNAVSHEPLAPRNEAFFTYVPGMLMAVLTVHPEMEHGISGDITADAVAARLAEPPIGLLTGVWQSSHDRAYLERGGVVHTANMEERWAPLTLPGMDPREPLRMAGLQADGGVYLHNGSQLWRLTETAAESVTTENLPEGAAVRIGAGGEVHGLHEGALHSNGISRPIELWRPKAGAPGREQSPARPVDLLPLPGGTAALILDDKGRIYHADLKGTGAVEAHRLKLPADFAQGKGWAVTAMGLSRDDTVHLMLQDQNGRRMSLQRAPGEALFRPAYLLDRPLLLLYTEGL…	173	-	21341	21372	CGGAACCGATCCGGTTGTCTGGCCACTCAATT
Pseudomonas syringae	1	PbbICMP13291	PbbICMP13291|ALQ19_100418	Cluster_2089.1	Type III secretion related protein	PbbICMP13291_Contig_140	-	9396	9794	399	132	CTGGCAATGAACTCATCACTCACCCTGCAAAAGCTGCTTGATAGGCGTGGTCAGGCGGCCAACGGAAATTCTGCAACGGAGGCCGTACAGTGGCAGGAAGGAATGAACCTGACGCTGCATGTAAGCGGCGATAGCCTCACGATGCTGGCCGAGATCATCGATCTGCGTGCCGACCCTCAGGACGACATCCTCTTGCGCAAGCTGCTTGCCCATGCTTTTCCGGGCCTGCGGCTACGACGCGGCGCGTTGACCATCAACCCGGACGAGAACACGTTGGTGTACTCCTACGAGCATGACTTTCTCGCGCTGGACAAGGCCCGATTCGAAAATCTGCTGGCTAATTTTGCCGAAACAACGCAGGAGTTGCGTAACACCGCGCAGCGCCTGCGTTACCGCTGA	MAMNSSLTLQKLLDRRGQAANGNSATEAVQWQEGMNLTLHVSGDSLTMLAEIIDLRADPQDDILLRKLLAHAFPGLRLRRGALTINPDENTLVYSYEHDFLALDKARFENLLANFAETTQELRNTAQRLRYR	23	-	9817	9849	GGGAACCACCGCATGGGTTCCGGCCACTCACCG
Pseudomonas syringae	1	PbbICMP13291	PbbICMP13291|ALQ19_100835	Cluster_2594.1	Type III Effector	PbbICMP13291_Contig_140	+	19656	20366	711	236	ATCTCAAGCAATCACATACTCGTCAGATCAACTCAATTAGCTTTCAGGATAACTATGATCACTCCGTCTCGATATCCAGGCATCTATATCGCCCCCCTCAGTAACGAACCGACAGCAGCTCACGCATTTAAAGAACAAGCAGAGGAAGCACTTGACCATATCAGCGCCGCACCCTCTGGCGATAAGCTATTGCGAAAAATATCCACTCTTGCCAGTCAAAAAGATAGAAAAGTCACGCTAAAAGAGATTGAAATAAATAACCAGTGTTATACCGAAGCTGTTCTGAGCAGGAGGCAACTGGAAAAGTACGAACCAGAAAACTTTAACGAGAACCGGCACATTGCATCACAGCTATCACGAAAGGGGACCTTTACCAAAGGTGAAGGAAGCAACGCGATT…	MSSNHILVRSTQLAFRITMITPSRYPGIYIAPLSNEPTAAHAFKEQAEEALDHISAAPSGDKLLRKISTLASQKDRKVTLKEIEINNQCYTEAVLSRRQLEKYEPENFNENRHIASQLSRKGTFTKGEGSNAIIGWSPDKASIRLNQNGSPLHLGMDNDDKITTLAHELVHARHVLGGSSLADGGDRYNPRTGSGKEELRAVGLDKYRYSLTKKPSENSIRAEHGLPLRMKYRAHQ	126	+	19498	19530	TGGAACCGAATCCATCTCGAGGGCCACTCAAGG
Pseudomonas syringae	1	PbbICMP4065	PbbICMP4065|ALQ06_00224	Cluster_3432.1	Type III Effector	PbbICMP4065_Contig_11	+	46328	47230	903	300	ATGAAAATATCCGGCTCCACATCGCCTGCACACACTTCAACGAATTCCGCGCAGAAGTCCTCTTCAAAAGGGCTGCTGAGTGGTTTGGCCAAGCATTTCAAAGGGATGCTCGTTTCTGGCAACACTTCTGGTCATTCGGCGCTCGGGCATTACGCGTCATCCAGCAGCGGCTCCAAAGGCAAGGCACCGGTACGGGACGATTACAGCAACGGACCGCAAACACGCCTTAACAACACACCTCTGAAACGAGCACTGGCCCGAGAGCTTGATCGCTTTGGCTACGGTTCATCGGCGACCGAGTCTTTTGACCGCTCATTGCAGCTTAAGGATAAAAATCCAGAGCTTGGTCACCTTGATGACGACGAGTACCTCGCTTTGCGCATGTACACAACGCCGTTT…	MKISGSTSPAHTSTNSAQKSSSKGLLSGLAKHFKGMLVSGNTSGHSALGHYASSSSGSKGKAPVRDDYSNGPQTRLNNTPLKRALARELDRFGYGSSATESFDRSLQLKDKNPELGHLDDDEYLALRMYTTPFYRAVNHQLRDGKPSEDMKVVVEAMNKGLKRLAEHPDNVVKETLYRGINKVVDDKFIHKNFKLGEVYRDKTFVSATPDLSTVNATFTRHTVKSSKAKASAPVYQRSPLLEIESRSAVRVRQVSLSSAEEEGIFAPDTPFLVADKSRTDSGRWHIKLKEIDESDESSGL	516	+	45781	45812	TGGAACCGGACGAGGCTTTTTACCACTCAATG
Pseudomonas syringae	1	PbbICMP4065	PbbICMP4065|ALQ06_00585	Cluster_452.1	Type III Effector	PbbICMP4065_Contig_130	+	1323	7196	5874	1957	ATGGTCAAGGTTACCTCTTCCGGATTTACTGCCAACCCTCTCTCTCATCATGCGGACAGTGTTTCCCCCGCGAACAGTCCCCCTCAGTTACCGGAGCCTGTGCCTCTGGTTGATCTAAGCGAGTCGTCCCGCAAGGGCGGCATGCGAAATCGGCCGCATGCCAGTTTGAACAGTCAGATGCTCGGACTGCAAGCGGTGCCGTCGCAACGCGGAAAGCATGTTCGTGTCAGAAGTCATGCCGATGGCGAGAGTGTCATTAACGCCTGGCTGGCAAAGCGACCCTCGGTTCAAAGCGAAACCAGCCTTGGTAACGATGGCAAGCTGGTGCGTTATAACGCTGTGAGTCATGAACCGCTGGCGCCGCGCAATGAGGCGTTTTTCACCTATGTACCGGGGATG…	MVKVTSSGFTANPLSHHADSVSPANSPPQLPEPVPLVDLSESSRKGGMRNRPHASLNSQMLGLQAVPSQRGKHVRVRSHADGESVINAWLAKRPSVQSETSLGNDGKLVRYNAVSHEPLAPRNEAFFTYVPGMLMAVLTVHPEMEHGISGDITADAVAARLAEPPIGLLTGVWQSSHDRAYLERGGVVHTANMEERWAPLTLPGMDPREPLRMAGLQADGGVYLHNGSQLWRLTETAAESVTTENLPEGAAVRIGAGGEVHGLHEGALHSNGISRPIELWRPKAGAPGREQSPARPVDLLPLPGGTAALILDDKGRIYHADLKGTGAVEAHRLKLPADFAQGKGWAVTAMGLSRDDTVHLMLQDQNGRRMSLQRAPGEALFRPAYLLDRPLLLLYTEGL…	173	+	1119	1150	CGGAACCGATCCGGTTGTCTGGCCACTCAATT
Pseudomonas syringae	1	PbbICMP4065	PbbICMP4065|ALQ06_01262	Cluster_4528.1	Type III secretion related protein	PbbICMP4065_Contig_18	+	1285	2559	1275	424	ATGAGCATCGGCATCACACCCCGGCCGCAACAGACCACCACGCCACTCGATTTTTCGGCGCTAAGCGGCAAGAGTCCTCAACCAAACACGTTCGGCGAGCAGAACACTCAGCAAGCGATCGACCCGAGTGCACTGTTATTCGGCAGCGACACACAGAAAGACGTCAACTTCGGCACGCCCGACAGCACCGTCCAGAATCCGCAGGACGCCAGCAAGCCCAACGACAGCCAGTCCAACATCGCTAAATTGATCAGTGCATTGATCATGTCGTTGCTGCAGATGCTCACCAACTCCAATAAAAAGCAGGATGCCAATCAGGAGCAGCCTGATAGCCAGGCTCCTTTCCAGAACAACGGCGGGCTCGGTACACCGTCGGCCGATAGCGGGGGCGGCGGTACA…	MSIGITPRPQQTTTPLDFSALSGKSPQPNTFGEQNTQQAIDPSALLFGSDTQKDVNFGTPDSTVQNPQDASKPNDSQSNIAKLISALIMSLLQMLTNSNKKQDANQEQPDSQAPFQNNGGLGTPSADSGGGGTPDATGGGGGDTPSATGGGGGDTPTATGGGGSGGGGTPTATGGGGGGTPTATGGGEGGVTPQITPQLANPNRTSGTGSVSDTAGSTEQAGKINVVKDTIKVGAGEVFDGHGATFTADKSMGNGDQGENQKPMFELAEGATLKNVNLGENEVDGIHVKAKNAQEVTIDNVHAQNVGEELITVKGEGGAAVTNLNIKNSSAKGADDKVVQLNANTHLKVDNFKADDFGTMVRTNGGKQFDDMSIELNGIEANHGKFALVKSDSDDLKLA…	122	+	1133	1163	GGGAACCGGTCGCTGCGCTTTGCCACTCACT
Pseudomonas syringae	1	PbbICMP4065	PbbICMP4065|ALQ06_01988	Cluster_3875.2	Type III Effector	PbbICMP4065_Contig_214	+	1156	2637	1482	493	ATGCAAATAAAGAACAGTCATCTCTCTTCAGCTTCAAGAATGGTGCAGACTACTTTTAATGCATCGCCTAAGATAGAAGTAACTAATACAATAGCGAAAAATAATGAACCCGCTGCGCTGAGCGCTACGCAAACCGCAAAGACACACGAAGGCGATTCAAAAGGCCAATCCAGCAATAACTCTAAATTGCCGTTCCGCGCCATGAGGTACGCTGCATACCTTGCAGGCAGCGCCTACCTCTACGATAAAACTGCCAATAATTTTTTTCTTTCTACCACTTCTCTGCATGATGGCAAATGTGGTTTTACCAGCGATGCCAGGCTTAACGATGCACAAGACAAAGCGCGAAAGCGCTACCAAAACAACCATAGCAGCACTCTTGAAAATAATAACTCGCTT…	MQIKNSHLSSASRMVQTTFNASPKIEVTNTIAKNNEPAALSATQTAKTHEGDSKGQSSNNSKLPFRAMRYAAYLAGSAYLYDKTANNFFLSTTSLHDGKCGFTSDARLNDAQDKARKRYQNNHSSTLENNNSLLSPLRLCGENQFLTMIDYRAATKEYLSDLVDTEQAHSSILKNIMCLKGELTNEEAIKKLNPEKIPKDFDLTNSEAYISKNKYSLTGVRNEETGSTGYTSRSITKPFVEKGLKHFIEETHGEKALTPKQCMETLDNLLRKNITLNSDSQFAAGQALLVFRQVYAGEDTWGDAERIILKSHYDRGTVLQDEADKIELSRPFSEQDLAKSVFKRNTSIAGPVLYHAYIYIQEKIFKLPLDKIEDLKHKSMSDLKNLTLTHVKLIDSGVG…	48	+	1076	1108	TGGAACTCTACGCTTGGCGACGACCACTTATAG
Pseudomonas syringae	1	PbbICMP4065	PbbICMP4065|ALQ06_02685	Cluster_4422.1	Type III secretion related protein	PbbICMP4065_Contig_37	-	11062	12036	975	324	ATGACCATGGGTGTTTCACCTATTCGTAACTCAAACTCCCTACCGATCGATTTTTCGTCGTTGAGCGCAAAGAGTGGCGGGCATAACGGGCTGGGCAGCGGAGACAATTCGACTATCGACCCGAGTACGTTGTTGTTCGGCAATCAAGGGCAGACGCAGGTCAATTTCGCTCCGCCCAACAGCACGGACTCCTCAACCAGCGGTGTGAACGCTGCGTCAGGCAATACGGCGTCCGGCCTGGTCGAGCAAATCATGAGCCTGCTGAAACAATTGATGCAGATGCTGATGCAAAACAACAATGCTCCCGGTAACCCTCAGACTGATTCGTCAACGCCAGGCGTCGGCAGTGGCAACAGCGTCGGGAGCGGCGGTACTGGAAGCAGTCTCGCAGGCAGTGAC…	MTMGVSPIRNSNSLPIDFSSLSAKSGGHNGLGSGDNSTIDPSTLLFGNQGQTQVNFAPPNSTDSSTSGVNAASGNTASGLVEQIMSLLKQLMQMLMQNNNAPGNPQTDSSTPGVGSGNSVGSGGTGSSLAGSDGGDETSGVGNGGLGDAGSTPTTSAADGVPSDTSLTGSGGLHLPQQLEQYRGDIMDAAKATGVPPSVIAGQIWAESRGQLNAATTNVNGKADAGLMQVNADTFKSLQQQNPGLLGNDVNDSHTNIMAGALYLRDQNKEFGDMGAALRAYNSGPDKVNKADLSDTGGVGGSSYPADVLNFAKIIESGQGNLPA	89	-	12125	12156	GGGAACCGAGTCACTCAGTGAACCACTCAGTT
Pseudomonas syringae	1	PbbICMP4065	PbbICMP4065|ALQ06_03356	Cluster_2089.1	Type III secretion related protein	PbbICMP4065_Contig_56	-	9395	9787	393	130	ATGAACTCATCACTCACCCTGCAAAAGCTGCTTGATAGGCGTGGTCAGGCGGCCAACGGAAATTCTGCAACGGAGGCCGTACAGTGGCAGGAAGGAATGAACCTGACGCTGCATGTAAGCGGCGATAGCCTCACGATGCTGGCCGAGATCATCGATCTGCGTGCCGACCCTCAGGACGACATCCTCTTGCGCAAGCTGCTTGCCCATGCTTTTCCGGGCCTGCGGCTACGACGCGGCGCGTTGACCATCAACCCGGACGAGAACACGTTGGTGTACTCCTACGAGCATGACTTTCTCGCGCTGGACAAGGCCCGATTCGAAAATCTGCTGGCTAATTTTGCCGAAACAACGCAGGAGTTGCGTAACACCGCGCAGCGCCTGCGTTACCGCTGA	MNSSLTLQKLLDRRGQAANGNSATEAVQWQEGMNLTLHVSGDSLTMLAEIIDLRADPQDDILLRKLLAHAFPGLRLRRGALTINPDENTLVYSYEHDFLALDKARFENLLANFAETTQELRNTAQRLRYR	29	-	9816	9848	GGGAACCACCGCATGGGTTCCGGCCACTCACCG
Pseudomonas syringae	1	PbbICMP4065	PbbICMP4065|ALQ06_03603	Cluster_2333.2	Type III Effector	PbbICMP4065_Contig_69	-	75273	76136	864	287	ATGAACATTACGCCGCTCACGTCAGCCGCGGGCAAGGGCTCGTCCGCACAAGGCACAGACAAAATTTCCATTCCCAACTCCACGCGCATGATCAATGCCGCGTCAATCAAGTGGTTGAACAAGGTGCGTAGCGCCATCAGTGACCACATCCGCACCAGCATCGAGAAAGGGAAACTGTTCGAGCTCGCCTCCTTGGGCAGCAACATGTTCGGTGTCCCGGCCCTTTCAGCGCGCCCCTCGACGCTCCAACCTGTGTTGGCGTTTGAGGCCGACCCCAATCACGACCTGAACCTTGTCAGGGTCTATATGCAGGACAGCGCCGGCAAGCTCACTCCCTGGGACCCGACGCCCAACGCGGTCACGACGACGTCGAATCCATCAGAGCCTGATGCGCAGAGC…	MNITPLTSAAGKGSSAQGTDKISIPNSTRMINAASIKWLNKVRSAISDHIRTSIEKGKLFELASLGSNMFGVPALSARPSTLQPVLAFEADPNHDLNLVRVYMQDSAGKLTPWDPTPNAVTTTSNPSEPDAQSDTASSSLPRRPPAGSVLSLLGIALDHAQRHSPRADRSAKGRPGREERNGARFNAKQTKPTEAEAYGDHQTPNPDLHRQKETAQCVAESINSMREQQNGMQRTEARLRAKEALQAREAARKQLLDVLEAIQAGREDSTDKKISATEKNATGINYQ	22	-	76158	76189	AGGAACTCATCACCGCGAATCGCCACTCAGCA
Pseudomonas syringae	1	PbbICMP4065	PbbICMP4065|ALQ06_03847	Cluster_406.1	Type III Effector	PbbICMP4065_Contig_77	+	1630	5715	4086	1361	ATGACCTTAAGAATCAATACTCGTTCTGCTACCCCGGTTGTACCTCTGGAAACAGGCTCTTCGTCGCAGCCGGCACCGCCGCCTGTCACGGCAAGAGCGACTGAGCCTCCCCCCGTCGCCAATCCTGCGGCGCCTAAATCAGCGCCAGGTGTTCAGCAAGCACACGGGCTGAAGACGCGCATCGCTGGCAAACTTTCCGAACGTCAGACCAATTTCAGTCTTGGTATTCCCGGCACCGGTCGTACTCTCAACCGGCCCCTGCGCAGCGGGATTCCGGAGGAAGGTGAGCAGGTATCGAACGAGGAGAGTCATGATCCGTTGCTCAAGGAAGCGCATGAACTGCAGCGCATGGTGGAGTCGGCGCTGACCCATCTGAAGGCGGCACCGACGTCTCTCTGG…	MTLRINTRSATPVVPLETGSSSQPAPPPVTARATEPPPVANPAAPKSAPGVQQAHGLKTRIAGKLSERQTNFSLGIPGTGRTLNRPLRSGIPEEGEQVSNEESHDPLLKEAHELQRMVESALTHLKAAPTSLWERPAPSTVRRITTKVFPWLKPAPLREVASNGSNAKTKIKINSQQSPETIAAAVKELSTRLDHQSKVLATATHALVAAREHLESLEQATPPSSTERLDHARARVQQADSTTRLASQQLRELIQGTDVLQLGALSEGQDQVEQKAEFSQQWLSELRTRMQAVDVRFADRHTAIEIELQLKVAQTRELISLDHDMTAAEHTAAQANTQLSALRAQRQETPEGSDEADRLDTAIGQTLATRSQAMQTHQQLAKRLVRVDADVARLNDELG…	277	+	1322	1353	CGGAACCGAATCCATATTTCGACCACCCATCC
Pseudomonas syringae	1	PbbICMP4065	PbbICMP4065|ALQ06_03927	Cluster_4702.2	Type III secretion related protein	PbbICMP4065_Contig_8	+	12764	13876	1113	370	ATGCAAGCACTTAACAGCATCAGTTCGTTGCAAACCTCTGCATCATTGTTCCCCGTGTCGCTCAACAGCGATGTGAGCGCCAACACCAGCACTTCCAGCAAAGAGCTCAAGGCTGTGATCGATCAGCTGGTTCAGGCGCTGACCCAAAGTGGGCAGCTCGATGAAACCTCACCGCTCGGCAAAATGCTCGCCAAGGCCATGGCTGCGGATGGCAAGTCGGCTAACAGCATCGATGACATCACTGCATCGCTCGACAAGCTGATCCACGAAAAGCTCGGCGACAATTTCGGTGCCTCTGCCGGCATCGGCGCGGGTGGCGGTGGCGGTGGCATTGGCGGGGCGGGTTCTGGTTCGGGTGTCGGTGGCGGTCTGAGCAGCGACGCGGGTGCCGGGCAATCC…	MQALNSISSLQTSASLFPVSLNSDVSANTSTSSKELKAVIDQLVQALTQSGQLDETSPLGKMLAKAMAADGKSANSIDDITASLDKLIHEKLGDNFGASAGIGAGGGGGGIGGAGSGSGVGGGLSSDAGAGQSDLMSQVLNGLGKAVLDDLLTPSGEGGTTFSSDDMPTLEKVAQFMDDNKAQFPTRDGGSWMNELKEDNGLDAQETAQFRSALDVIGQQLGQQQGDASGVTSGGGLGSPVSDSSLGNPAIDANTGPAANGNASVDVGQLIGQLIDRGLQSVSSGGGLGTPVDNSTQPAGGTPAANPTGNVSNQDLGQLLSGLLQRGLEATLQDAGNTGADLQSSAAQVAAQLINALLQGTNNQTNQAVA	442	+	12290	12322	TGGAACCGATTCGCAGGCTGCTGCCACCTAGTG
Pseudomonas syringae	1	PbbICMP4065	PbbICMP4065|ALQ06_03928	Cluster_28714.2	Type III secretion related protein	PbbICMP4065_Contig_8	+	13904	14278	375	124	GTGACCATTTCCCAACTCAGCAATTTGAAAAGTGTATCGCCGGAGCTTGGGCAGAATGCTCATCAGGGGCTCGGCTCCGAACCCTTTCAGGCGGATGTCGACCTATTCAATGCGGCGATGCGTCCTGACAGCGGGCCCGCAGCGTCGCACCTGTCCGACCGGATAGCCAGTGCGCTGTCCGAGCGGCTGGGCAGTACCGAGAAGCTTTCACAGCAAGCATTACGCCAGATGAAGAAAGTGTCGAACACCGAAGATCCTGGAGACATCGTGCAGATGAGTCGGGCGTTGTCGCAGTGCTCGTTGCAAATGGCGTTGACGACCAAGGTCGTGAGCAAGAGCGCTCAGGCGCTCGACAAGTTGACCAACCTGCAGTAG	MTISQLSNLKSVSPELGQNAHQGLGSEPFQADVDLFNAAMRPDSGPAASHLSDRIASALSERLGSTEKLSQQALRQMKKVSNTEDPGDIVQMSRALSQCSLQMALTTKVVSKSAQALDKLTNLQ	1582	+	12290	12322	TGGAACCGATTCGCAGGCTGCTGCCACCTAGTG
Pseudomonas syringae	1	PbbICMP4065	PbbICMP4065|ALQ06_03930	Cluster_2413.3	Type III secretion related protein	PbbICMP4065_Contig_8	+	15090	15620	531	176	ATGATGAGCCTTTCCGCCGAGGATCACTGGGTCCACTGGTGGTGCAACCCCTGGCAGTGGGCTCATTCGCAGTGGCATGACCGATTCGCCAGCGCTCGGGGGTTGTCGGTCAGTGACTGCGATGCGCTCATGGCCAGCCGTCATGGCGTGTTTCTGCAGAGTCTGGGCATCGACCCGGCTCAGCCGCCAGCGCCCGCGGAACCGGTGCTGCGCTGGTTGGCGCTGACGCCCTCGCAGCGTGAGCAGGCGCTAAGCCTGGCGCAGTGCATCTGCTTCTCCCGTAACGAAAGCGACGGCCCTGACGGTCAATGGTGCTGGGGGTTGACCAAAGCGCTGCGCCCCGGTGTCTGGCTGGAGTTTGAACACGAGGACGCGCGTCTTCTGCTGGGCGCCTGGCTT…	MMSLSAEDHWVHWWCNPWQWAHSQWHDRFASARGLSVSDCDALMASRHGVFLQSLGIDPAQPPAPAEPVLRWLALTPSQREQALSLAQCICFSRNESDGPDGQWCWGLTKALRPGVWLEFEHEDARLLLGAWLGPQYWSRLRLEWPPNEVPDTPGKAPENKLQALWQAIMWRVTAA	2768	+	12290	12322	TGGAACCGATTCGCAGGCTGCTGCCACCTAGTG
Pseudomonas syringae	1	PbbICMP4065	PbbICMP4065|ALQ06_03932	Cluster_49085.1	Type III secretion related protein	PbbICMP4065_Contig_8	+	16314	16556	243	80	TTGCTGGAGCACCAGGACATGATCAGTTTCAACAGCTTGCAACGCCATCTCGACAACTCGGTGAGCCGTGCTCACACCAACATGGACCAGGCAGCGATGGAAGCCTCCGAGAGTGGCACCGTCGAAGACCTGCAGGCATTCAACGATGCCCAGCAGCAGGTCGATGTCGCCGGTATTGCCGTCAATGAATGCCTGCGTGCCAAGCACGGTATCAATAAAGCAGTCATCGATGGAATTCAGTGA	MLEHQDMISFNSLQRHLDNSVSRAHTNMDQAAMEASESGTVEDLQAFNDAQQQVDVAGIAVNECLRAKHGINKAVIDGIQ	12	+	16270	16302	TGGAACCGCTCGGCGGGTTTGCTCCACTCAAGG
Pseudomonas syringae	1	PbbICMP4065	PbbICMP4065|ALQ06_03942	Cluster_3403.1	Type III secretion related protein	PbbICMP4065_Contig_8	-	24090	24665	576	191	GTGACGATGACCGCACCGATCAAAACCCCGGCCAAAGCGCCACCAGCACCCCAGCGCCCTGCGCCTGTCGAGCGGCCAGCCACAGCTCTGAGCGAAAAACCATTCGGTGAAAAACGCCTTGCATCCGGTGGCTTGGGCCGTGGCGATGTACAGACCAGCCGTTCGGTACTGAGCAAGTCGCTGCAAGACACCCCGATGAGTGCCGACGGCATGTTCTTTTCGCAACTGCTGGTGCCGCCCGTAAGTGCCGAACCTGATCAGCAAGGCTTTGGCGGGGGCGGTATAGCCTTTCCGGTACGCGCAGAACAAGTGCCGACCCAACTGATCGACGAGCTGGCGCAGCGCCTGCCGGATCAGCCTGACGGCCCCCTCAGTTTCACCCTGCTGATGCCCAACCTG…	MTMTAPIKTPAKAPPAPQRPAPVERPATALSEKPFGEKRLASGGLGRGDVQTSRSVLSKSLQDTPMSADGMFFSQLLVPPVSAEPDQQGFGGGGIAFPVRAEQVPTQLIDELAQRLPDQPDGPLSFTLLMPNLGSVRVNANKTENRWSVQLGFARRDVLKRLSAHTGACRDSLSQALGQDVELDMHEDLSA	6042	-	30707	30739	GGGAACTGATCCGGGACCGTGACCCACTCAGCG
Pseudomonas syringae	1	PbbICMP4065	PbbICMP4065|ALQ06_03947	Cluster_4852.1	Type III secretion related protein	PbbICMP4065_Contig_8	-	29574	30680	1107	368	ATGAAAATCGTCGCTCCGCCTATCATGCGAATACTTCCGGTCGCGCCGACCCGCGTCGTGACGCCTGCTGCGCAGCCACTTCCCAATGCTGATCTGCACAATTCAGGGACTTCGCCACAACAGGTTTCGCGCTTCGCGGCCGCGCTCATCCAGCACAGACGCATCCTCATTCAGCGCGACCTGATCGCCAGCAACAATGCCTTGCAGTCGCGAGCGGTGAAGCTCGGTGAGCTTTATCAACTGCTGATGACCGATCAGGACACCGGGCTGGATAACGCGGCCAGGGTATTGCGCAAAAAGCTCATGCAGGATGACTCGTCCTCAGATCTGAAACAGGTTCTGGATTACACCGACGGTGATGCCGCCAAGGCTCATGTGGTGTTGCAAGCCGCCAGGAAG…	MKIVAPPIMRILPVAPTRVVTPAAQPLPNADLHNSGTSPQQVSRFAAALIQHRRILIQRDLIASNNALQSRAVKLGELYQLLMTDQDTGLDNAARVLRKKLMQDDSSSDLKQVLDYTDGDAAKAHVVLQAARKQAEADGEMGEHVVLTQQLKQLRRKYGPRARAGINSAKAFARPNIDNKRRVALRNLYSVAVSGQPNITGLIEALLGEQQEAGQFNIDLRDMRTAIADDLSAMTPSASHEQLRTLMHGLNTARHVTTLLKGCEHLLGRMRNKNPDLTVDPPAFLKHLLTLTANGMNVNQTLQLTQHIGGKQLKHQLAFLNGLRPMLLQLPILLWRDMKSRQTALSNLLILMAELTTQEQKQLYGGLV	27	-	30707	30739	GGGAACTGATCCGGGACCGTGACCCACTCAGCG
Pseudomonas syringae	1	PbbICMP4065	PbbICMP4065|ALQ06_03949	Cluster_477.1	Type III Effector	PbbICMP4065_Contig_8	+	31565	33907	2343	780	ATGCGTATATCCAGTTCTCCCTTCGTTATCGTGAACCAACCCACCCCTGGCGAACTGGCTCTGGCTGTTGAGTCGCCTCTTGCCAAAGCCTTGCCGACACCTGCGGGTGGCGGTGGGCAAGCCGGCGTGCAGTTCGGTCAGCCGGCCGGCAACACGCAAGGCGCGCCGACAGGAGCCGAGCAGACCGCGTCGTCTATCCTGGCTCTTTTGCTCCAGGGCAGTGGCGGGGCAGCTGCCAATGTCAATGTGAATAATCAGGTCCAGCCGCAACCCTGCGCAGATTCTCCTGCCGAGGCTGCACCGACTGAAGCAACTGCCCCGGCCGCTCCGGTTGAACAGGTCGCAGCTCCCACGAACACAGATGCAACCGACGCTTCCAACGCCCCCAAAGCCGCAGAC…	MRISSSPFVIVNQPTPGELALAVESPLAKALPTPAGGGGQAGVQFGQPAGNTQGAPTGAEQTASSILALLLQGSGGAAANVNVNNQVQPQPCADSPAEAAPTEATAPAAPVEQVAAPTNTDATDASNAPKAADAAFLDNSEYSSPEALKRWEPMVAHLPPEEREQAAKELNRPIAAAWMARDDGPDAGKAMDFINANPALKTAVDVAQGGGNADGKITNKDLKTFAKNMEKAADSADKDLANYTKDNPDADPQSLEMVRSAAVMRANMPLAIAADPHHAVDAADKTKVDGNVDAEDLKGLAQSNPGLSGALKQSCSTWSQPGFLGQVDEAGMSGRKKAAHSPDKMFDAKNLSEWIKKSAPTNGGQFASMLSDSATLNAVAGIDISKLDKDVFDKPKSYS…	32	+	31502	31533	TGGAACCAACTTGCACCTTCAACCACACAGTT
Pseudomonas syringae	1	PbbICMP4065	PbbICMP4065|ALQ06_05361	Cluster2_1015.6	NA	PbbICMP4065_Contig_44	-	1	9487	9487	3162	ATGAAGCCATCAAATCAACAAGCATCGAAAAACTCAAATTTCTCGTATGAACTGTCCCCTGTACAGCAGGGTATCTGGCTCGGTCAGATAGCGGATTCGAACATACCACTGTACAACATTGGCATGAGACTGGAGATCAATGGTGATCTCGATATTCCGATGTTCGAGAAGGCTATCAATCTGGTTGCCAAGCATAACGATGCACTACGGCTTGCCTTGTTCCATGAGGGCGATATAGCCAGGCAGAGGGTGCTGCCATCTGTCGATATCAGACTCGCACTCGTCGATTTTTCAGACTACGTTGACAGTGTCGAGCGAGCGCTGGAATACCTTCAACAATCATTTTCCCGACCGTTCAATCCCTTGGAAGGCATTCTTTGGGAGGTGCAGCTCGTACGG…	MKPSNQQASKNSNFSYELSPVQQGIWLGQIADSNIPLYNIGMRLEINGDLDIPMFEKAINLVAKHNDALRLALFHEGDIARQRVLPSVDIRLALVDFSDYVDSVERALEYLQQSFSRPFNPLEGILWEVQLVRCSASHHYWLGRCHHLVMDGAGVTLFCHAVEKAYNNLLAGIDELEEAPSYSDFLIKDKAYLSSSRLERDRAFWRERYTQLPPPLLQWSGDHAVGSMCKSGHIRSTIKRDLFNALVAVATEHDLSPVAIFFAAVGAYFSRVGDAEEVIIGMPLHNRTTACQKKTIGMFSSVIPIGVRVDPNRSLLELMGDVAAELRRCYRHEHFPIAELNRALNIGHSRRKQIFDITLSFEKFDADFIFGGSPAQAIRMYSGFDQTPLSIAICDYYSD…	823	-	10310	10341	TGGAACCGATAACAAATTTTTGGCCACATACA
Pseudomonas syringae	1	PbbICMP4065	PbbICMP4065|ALQ06_05538	Cluster_4756.1	polygalacturonase activity	PbbICMP4065_Contig_71	+	67596	69212	1617	538	ATTTCACAGGGATTCTTGATGTCAGGCGCCGCACACTTCTCCAACTCCGTTTTCCGAAAAACCTCCTGGGCAATGACCTCTCTGACCGCTTCGCTGATGATCGCCGCGCCCGTACAGGCCGCTGGCGAGGCTGCGGTGGTAACGCCCTGGGGCACGATAAACGAGCCCGCCAGCCCGCAGGTCTGCAAGCAACTACCGGCCACGTTGGCCCCCAAGGATGGCTCGCTGGACAGCGTCGACAGTGCGGCGCTCGACTCCAGACCTGACCAGGACAGAATTCAGAGCGCAATCAATGGCTGCGCAGCCGGGCAAGCCGTCCAACTGGTCAAAGGCACTGGCGACAACTCGGCATTCCTCAGCGGAGCCCTGCAGCTTAAATCCGGCGTGACGCTGTGGATC…	MSQGFLMSGAAHFSNSVFRKTSWAMTSLTASLMIAAPVQAAGEAAVVTPWGTINEPASPQVCKQLPATLAPKDGSLDSVDSAALDSRPDQDRIQSAINGCAAGQAVQLVKGTGDNSAFLSGALQLKSGVTLWIDDGVTLFASRNPKDYDNGKGTCGVTTVANQDACSALISAKNTRASGVIGKGVIDGRGGSLLTSGANANQRSWWDLVYQKTLSNAYQQKPRLIQVSGGADFVIQGVTLQNAPDFNIVTDGVTGVTVWGIKILTPSRVYTVEGYHCPTGSTPDQKTPGTCFTPETVKNTDGFDPGQSNKVLLAYSYISTGDDNVAIKSSRTSGSRDLMFAHNHFYYGHGLSIGSETNGGVHNVSVVDLAADGADSQDGIGLRIKSGAKNGGIVDGVSY…	962	+	70174	70205	GGGAACCGATTCGCTTCTAAAACCACTCAATC
Pseudomonas syringae	1	PbbICMP4065	PbbICMP4065|ALQ06_100792	Cluster_2594.1	Type III Effector	PbbICMP4065_Contig_56	+	19655	20365	711	236	ATCTCAAGCAATCACATACTCGTCAGATCAACTCAATTAGCTTTCAGGATAACTATGATCACTCCGTCTCGATATCCAGGCATCTATATCGCCCCCCTCAGTAACGAACCGACAGCAGCTCACGCATTTAAAGAACAAGCAGAGGAAGCACTTGACCATATCAGCGCCGCACCCTCTGGCGATAAGCTATTGCGAAAAATATCCACTCTTGCCAGTCAAAAAGATAGAAAAGTCACGCTAAAAGAGATTGAAATAAATAACCAGTGTTATACCGAAGCTGTTCTGAGCAGGAGGCAACTGGAAAAGTACGAACCAGAAAACTTTAACGAGAACCGGCACATTGCATCACAGCTATCACGAAAGGGGACCTTTACCAAAGGTGAAGGAAGCAACGCGATT…	MSSNHILVRSTQLAFRITMITPSRYPGIYIAPLSNEPTAAHAFKEQAEEALDHISAAPSGDKLLRKISTLASQKDRKVTLKEIEINNQCYTEAVLSRRQLEKYEPENFNENRHIASQLSRKGTFTKGEGSNAIIGWSPDKASIRLNQNGSPLHLGMDNDDKITTLAHELVHARHVLGGSSLADGGDRYNPRTGSGKEELRAVGLDKYRYSLTKKPSENSIRAEHGLPLRMKYRAHQ	126	+	19497	19529	TGGAACCGAATCCATCTCGAGGGCCACTCAAGG
Pseudomonas syringae	1	PbbICMP4065	PbbICMP4065|ALQ06_101401	Cluster_12167.1	Type III Effector	PbbICMP4065_Contig_44	+	11900	12151	252	83	ATGAATCGCATTTCAACCAGCTCAGTAAATTCCAGCTTCAAATACACGGCCCCTACGAAGGAAGCGCAAAACCGCTTCGCCTCAGCGCCCGACAATTCCCCTCTAGTTGCCACCACAACATCTATCACCCAAACCCTCGTGCAGCCTGGTCGACTCGATAAAAACCACCGTCTGATGGATTCCAAAATCATCAATTTTTCAGTCGCATTTAATCTCGGCCGGACGCGCTCGATTGCTGGTGGCAGTGCATGA	MNRISTSSVNSSFKYTAPTKEAQNRFASAPDNSPLVATTTSITQTLVQPGRLDKNHRLMDSKIINFSVAFNLGRTRSIAGGSA	82	+	11786	11818	AGGAACTGCAAGCTGGTGCGGCTCCACTAAAAC
Pseudomonas syringae	1	PbbICMP4065	PbbICMP4065|ALQ06_200015	Cluster_3875.2	Type III Effector	PbbICMP4065_Contig_114	+	20779	21912	1134	377	ATGCAAATAAAGAACAGTCATCTCTATTCAGCTTCAAGAATGGTGCAGAATACTTTTAATGCCTCGCCTAAGATGGAAGCAACTAATGCAATAGCAAAAAATAATGAACCTGCTGCGCTGAGCGCTACGCAAACTGCAAAGACACACGAAGGCGATTCAAAAGGCCAATCCAGCAATAACTCTAAATTGCCCTTCCGCGCCATGAGGTACGCTGCATACCTTGCAGGCAGCGCCTACCTCTACGATAAAACTGCCAATAATTTTTTTCTTTCTACCACTTCTCTGCATGATGGCAAAGGTGGTTTTACCAGCGATGCCAGGCTTAACGATGCACAAGATAAAGCGCGAAAGCGCTACCAAAACAACCATAGCAGCACTCTTGAAAATAAGAACTCGCTT…	MQIKNSHLYSASRMVQNTFNASPKMEATNAIAKNNEPAALSATQTAKTHEGDSKGQSSNNSKLPFRAMRYAAYLAGSAYLYDKTANNFFLSTTSLHDGKGGFTSDARLNDAQDKARKRYQNNHSSTLENKNSLLSPLRLCGENQFLTMIDYRAATKIYLSDLVDTEQAHTSILKNIMCLKGELTNEEAIKKLNPEKTPKDFDLTNSEAYISKNKYSLTGVKNEETGSTGYTSRSITKPFVEKGLKHFIEATHGEKALTPKQCMETLDNLLRKSITLNSDSQFAAGQALLVFRQVYAGEDAWGDAERVILKSHYNRGTVLQDEADKIELSRPFSEQDLAKNMFKRNTSIAGPVLYHAYIYIQEKIFKLPPRQNRRFET	48	+	20699	20731	TGGAACTCTACGCTTGGCGATGACCACGTATGA
Pseudomonas syringae	1	PbbICMP4065	PbbICMP4065|ALQ06_200073	Cluster_12060.1	Type III Effector	PbbICMP4065_Contig_86	-	2057	2713	657	218	GTGAGAGTATCAAACACTTTGCAGCCAGCGGTCGAACATACTACTCAAGCAACTATAGGGGGTTGCTCCAGCTCCACAGCTTCACGCATCAAAGAGATACCTTTCAAGCAAGCAGATGAGCTGGCAAGAGTCGGCGATCAACGAGCGGCCTGCGTTGTGTTAACCGCAGCGTGGTTGGACCGCGTCCGCCATCACTCACAACCGGCCGAAGCACGTATCGATCATATGCGACATAGAGCGACCCTGGAACAAGTTGCTGAGCGTCAGCAGACGTACCGTAATCATGAAATAAATAATCCTCGTACTCCGTACGAAATATTATTCTCTCCCACCTTCCGAGATTATTCATTGCGTCTCAGTAATGCTCGCATTCTTGATATTATGAGCGATGAAGAACAA…	MRVSNTLQPAVEHTTQATIGGCSSSTASRIKEIPFKQADELARVGDQRAACVVLTAAWLDRVRHHSQPAEARIDHMRHRATLEQVAERQQTYRNHEINNPRTPYEILFSPTFRDYSLRLSNARILDIMSDEEQAMGSMANTLRDPNSSHVLVIVRMNGDNHAIATHCTGNKLHVFDPNHGEYSFKADTGTVEENMRDIIQAYSSRFPVPEIHILPVRS	27	-	2740	2771	CGGAACTGATAGAAGGTCTCGACCACTCAGTG
Pseudomonas syringae	1	PbbICMP4116	PbbICMP4116|ALO86_00763	Cluster_452.1	Type III Effector	PbbICMP4116_Contig_120	+	1322	7195	5874	1957	ATGGTCAAGGTTACCTCTTCCGGATTTACTGCCAACCCTCTCTCTCATCATGCGGACAGTGTTTCCCCCGCGAACAGTCCCCCTCAGTTACCGGAGCCTGTGCCTCTGGTTGATCTAAGCGAGTCGTCCCGCAAGGGCGGCATGCGAAATCGGCCGCATGCCAGTTTGAACAGTCAGATGCTCGGACTGCAAGCGGTGCCGTCGCAACGCGGAAAGCATGTTCGTGTCAGAAGTCATGCCGATGGCGAGAGTGTCATTAACGCCTGGCTGGCAAAGCGACCCTCGGTTCAAAGCGAAACCAGCCTTGGTAACGATGGCAAGCTGGTGCGTTATAACGCTGTGAGTCATGAACCGCTGGCGCCGCGCAATGAGGCGTTTTTCACCTATGTACCGGGGATG…	MVKVTSSGFTANPLSHHADSVSPANSPPQLPEPVPLVDLSESSRKGGMRNRPHASLNSQMLGLQAVPSQRGKHVRVRSHADGESVINAWLAKRPSVQSETSLGNDGKLVRYNAVSHEPLAPRNEAFFTYVPGMLMAVLTVHPEMEHGISGDITADAVAARLAEPPIGLLTGVWQSSHDRAYLERGGVVHTANMEERWAPLTLPGMDPREPLRMAGLQADGGVYLHNGSQLWRLTETAAESVTTENLPEGAAVRIGAGGEVHGLHEGALHSNGISRPIELWRPKAGAPGREQSPARPVDLLPLPGGTAALILDDKGRIYHADLKGTGAVEAHRLKLPADFAQGKGWAVTAMGLSRDDTVHLMLQDQNGRRMSLQRAPGEALFRPAYLLDRPLLLLYTEGL…	173	+	1118	1149	CGGAACCGATCCGGTTGTCTGGCCACTCAATT
Pseudomonas syringae	1	PbbICMP4116	PbbICMP4116|ALO86_01257	Cluster_3432.1	Type III Effector	PbbICMP4116_Contig_141	-	1790	2692	903	300	ATGAAAATATCCGGCTCCACATCGCCTGCACACACTTCAACGAATTCCGCGCAGAAGTCCTCTTCAAAAGGGCTGCTGAGTGGTTTGGCCAAGCATTTCAAAGGGATGCTCGTTTCTGGCAACACTTCTGGTCATTCGGCGCTCGGGCATTACGCGTCATCCAGCAGCGGCTCCAAAGGCAAGGCACCGGTACGGGACGATTACAGCAACGGACCGCAAACACGCCTTAACAACACACCTCTGAAACGAGCACTGGCCCGAGAGCTTGATCGCTTTGGCTACGGTTCATCGGCGACCGAGTCTTTTGACCGCTCATTGCAGCTTAAGGATAAAAATCCAGAGCTTGGTCACCTTGATGACGACGAGTACCTCGCTTTGCGCATGTACACAACGCCGTTT…	MKISGSTSPAHTSTNSAQKSSSKGLLSGLAKHFKGMLVSGNTSGHSALGHYASSSSGSKGKAPVRDDYSNGPQTRLNNTPLKRALARELDRFGYGSSATESFDRSLQLKDKNPELGHLDDDEYLALRMYTTPFYRAVNHQLRDGKPSEDMKVVVEAMNKGLKRLAEHPDNVVKETLYRGINKVVDDKFIHKNFKLGEVYRDKTFVSATPDLSTVNATFTRHTVKSSKAKASAPVYQRSPLLEIESRSAVRVRQVSLSSAEEEGIFAPDTPFLVADKSRTDSGRWHIKLKEIDESDESSGL	516	-	3208	3239	TGGAACCGGACGAGGCTTTTTACCACTCAATG
Pseudomonas syringae	1	PbbICMP4116	PbbICMP4116|ALO86_01450	Cluster_406.1	Type III Effector	PbbICMP4116_Contig_154	+	1628	5713	4086	1361	ATGACCTTAAGAATCAATACTCGTTCTGCTACCCCGGTTGTACCTCTGGAAACAGGCTCTTCGTCGCAGCCGGCACCGCCGCCTGTCACGGCAAGAGCGACTGAGCCTCCCCCCGTCGCCAATCCTGCGGCGCCTAAATCAGCGCCAGGTGTTCAGCAAGCACACGGGCTGAAGACGCGCATCGCTGGCAAACTTTCCGAACGTCAGACCAATTTCAGTCTTGGTATTCCCGGCACCGGTCGTACTCTCAACCGGCCCCTGCGCAGCGGGATTCCGGAGGAAGGTGAGCAGGTATCGAACGAGGAGAGTCATGATCCGTTGCTCAAGGAAGCGCATGAACTGCAGCGCATGGTGGAGTCGGCGCTGACCCATCTGAAGGCGGCACCGACGTCTCTCTGG…	MTLRINTRSATPVVPLETGSSSQPAPPPVTARATEPPPVANPAAPKSAPGVQQAHGLKTRIAGKLSERQTNFSLGIPGTGRTLNRPLRSGIPEEGEQVSNEESHDPLLKEAHELQRMVESALTHLKAAPTSLWERPAPSTVRRITTKVFPWLKPAPLREVASNGSNAKTKIKINSQQSPETIAAAVKELSTRLDHQSKVLATATHALVAAREHLESLEQATPPSSTERLDHARARVQQADSTTRLASQQLRELIQGTDVLQLGALSEGQDQVEQKAEFSQQWLSELRTRMQAVDVRFADRHTAIEIELQLKVAQTRELISLDHDMTAAEHTAAQANTQLSALRAQRQETPEGSDEADRLDTAIGQTLATRSQAMQTHQQLAKRLVRVDADVARLNDELG…	277	+	1320	1351	CGGAACCGAATCCATATTTCGACCACCCATCC
Pseudomonas syringae	1	PbbICMP4116	PbbICMP4116|ALO86_01558	Cluster_3243.1	Type III Effector	PbbICMP4116_Contig_161	-	2295	3758	1464	487	ATGCACATCAACCAATCCGCCCAACAACCGCCTGGCGTTGCAATGGAGAGTTTTCGGACAGCTTCCGACGCGTCCCTTGCTTCGAGTTCTGTGCGGTCTGTCAGCACTACCTCGAGCCGCGATCTACAAGCTATTACCGATTATCTGAAACATCACGTGTTCGCTGCGCACAGGTTTTCGGTAATAGGCTCACCGGATGAGCGTGATGCCGCTCTTGCACACAACGAGCAGATCGATGCGTTGGTAGAGACACGCGCCAACCGCCTTTACTCCGAAGGGGAGACCCCCGCAACCATCGCCGAAACATTCGCCAAGGCGGAAAAGTTCGACCGTTTGGCGACGACCGCATCAAGTGCTTTTGAGAACACGCCATTTGCCGCTGCCTCGGTGCTTCAGTAC…	MHINQSAQQPPGVAMESFRTASDASLASSSVRSVSTTSSRDLQAITDYLKHHVFAAHRFSVIGSPDERDAALAHNEQIDALVETRANRLYSEGETPATIAETFAKAEKFDRLATTASSAFENTPFAAASVLQYMQPAINKGDWLPTPLKPLTPLISGALSGAMDQVGTKMMDRARGDLHYLSTSPDKLHDAMAASVKRHSPALGRQVVDMGIAVQTFSALNVVRTVLAPALASRPSVQGAVDFGVSTAGGLVANAGFGDRMLSVQSRDHLRGGAFVLGMKDKEPKAALSEETDWLDAYKAIKSASYSGAALNVGKRMAGLPLDVATDGLKAVRSLVSATSLTKNGLALAGGYAGVSKLQKMATKNITDPATKAAVSQLSNLVGSVGVFAGWTTAGLATD…	164	-	3922	3954	TGGAACCGTTAACGGCCCAGCGACTACACAGCT
Pseudomonas syringae	1	PbbICMP4116	PbbICMP4116|ALO86_01680	Cluster_12060.1	Type III Effector	PbbICMP4116_Contig_176	-	15	671	657	218	GTGAGAGTATCAAACACTTTGCAGCCAGCGGTCGAACATACTACTCAAGCAACTATAGGGGGTTGCTCCAGCTCCACAGCTTCACGCATCAAAGAGATACCTTTCAAGCAAGCAGATGAGCTGGCAAGAGTCGGCGATCAACGAGCGGCCTGCGTTGTGTTAACCGCAGCGTGGTTGGACCGCGTCCGCCATCACTCACAACCGGCCGAAGCACGTATCGATCATATGCGACATAGAGCGACCCTGGAACAAGTTGCTGAGCGTCAGCAGACGTACCGTAATCATGAAATAAATAATCCTCGTACTCCGTACGAAATATTATTCTCTCCCACCTTCCGAGATTATTCATTGCGTCTCAGTAATGCTCGCATTCTTGATATTATGAGCGATGAAGAACAA…	MRVSNTLQPAVEHTTQATIGGCSSSTASRIKEIPFKQADELARVGDQRAACVVLTAAWLDRVRHHSQPAEARIDHMRHRATLEQVAERQQTYRNHEINNPRTPYEILFSPTFRDYSLRLSNARILDIMSDEEQAMGSMANTLRDPNSSHVLVIVRMNGDNHAIATHCTGNKLHVFDPNHGEYSFKADTGTVEENMRDIIQAYSSRFPVPEIHILPVRS	27	-	698	729	CGGAACTGATAGAAGGTCTCGACCACTCAGTG
Pseudomonas syringae	1	PbbICMP4116	PbbICMP4116|ALO86_01811	Cluster_147_1011.1	NA	PbbICMP4116_Contig_188	+	12049	12423	375	124	ATGATGATCTGTCCGATCACACCACCTTGCAGTTGGTATCCTATGACACTCTTTGAATACACCCAGGCCTTCGTCCCCCTTCCCTACAAAACCGTGACCAGCGGCGTGCTGATGTTCAAGTCGACAGATGAGACAACAGAACCCGACATTCAAGGCTACTTGAGCAACCCTGAGACTCTCGATGTATTGAACCGCTACGGTCGAGAGGGGTGGGAGCTGGTGAGCGTTCAGCAGATCAATCGTGGCCACGAGCGACTGGGTAATCAAAACGCCCAGGCCTGGGCGGTTGGGTATGCAATCAGTACCGGGTTCCTGTTCTTCTTCAAACGCAGCGCTGCACCGCTTACACCTTTGGACAAACCCTCTCAGACCTAA	MMICPITPPCSWYPMTLFEYTQAFVPLPYKTVTSGVLMFKSTDETTEPDIQGYLSNPETLDVLNRYGREGWELVSVQQINRGHERLGNQNAQAWAVGYAISTGFLFFFKRSAAPLTPLDKPSQT	64	+	11953	11985	TGGACCCGAATCCGTCTTAAACACCACTCAAGG
Pseudomonas syringae	1	PbbICMP4116	PbbICMP4116|ALO86_02039	Cluster_4528.1	Type III secretion related protein	PbbICMP4116_Contig_2	-	63369	64643	1275	424	ATGAGCATCGGCATCACACCCCGGCCGCAACAGACCACCACGCCACTCGATTTTTCGGCGCTAAGCGGCAAGAGTCCTCAACCAAACACGTTCGGCGAGCAGAACACTCAGCAAGCGATCGACCCGAGTGCACTGTTATTCGGCAGCGACACACAGAAAGACGTCAACTTCGGCACGCCCGACAGCACCGTCCAGAATCCGCAGGACGCCAGCAAGCCCAACGACAGCCAGTCCAACATCGCTAAATTGATCAGTGCATTGATCATGTCGTTGCTGCAGATGCTCACCAACTCCAATAAAAAGCAGGATGCCAATCAGGAGCAGCCTGATAGCCAGGCTCCTTTCCAGAACAACGGCGGGCTCGGTACACCGTCGGCCGATAGCGGGGGCGGCGGTACA…	MSIGITPRPQQTTTPLDFSALSGKSPQPNTFGEQNTQQAIDPSALLFGSDTQKDVNFGTPDSTVQNPQDASKPNDSQSNIAKLISALIMSLLQMLTNSNKKQDANQEQPDSQAPFQNNGGLGTPSADSGGGGTPDATGGGGGDTPSATGGGGGDTPTATGGGGSGGGGTPTATGGGGGGTPTATGGGEGGVTPQITPQLANPNRTSGTGSVSDTAGSTEQAGKINVVKDTIKVGAGEVFDGHGATFTADKSMGNGDQGENQKPMFELAEGATLKNVNLGENEVDGIHVKAKNAQEVTIDNVHAQNVGEELITVKGEGGAAVTNLNIKNSSAKGADDKVVQLNANTHLKVDNFKADDFGTMVRTNGGKQFDDMSIELNGIEANHGKFALVKSDSDDLKLA…	122	-	64765	64795	GGGAACCGGTCGCTGCGCTTTGCCACTCACT
Pseudomonas syringae	1	PbbICMP4116	PbbICMP4116|ALO86_02040	Cluster_3390.2	Type III secretion related protein	PbbICMP4116_Contig_2	+	64949	65443	495	164	ATGACCAACAATGACCAGTACCACACCCTTATCAACGAAATCTGCGCACTCAGCCTGATTTCCACACCTGAACGTTTCTATGAATCTGCCAATTTCAAAATCAGCGAAGTGGACTTCACCCTGCAGTTTCAGGACCGCGACGAAGGCCGTGCCGTTCTGATCTACGGTGACATGGGCGCGTTGCCCGCGCGCGGCCGTGAGAGCGCGTTGCTGGCGTTGATGGACATCAACTTTCACATGTTCGCGGGCGCCCACAGCCCGGCATTTTCCTTTAATGCGCAGACCGGTCGTGTGCTGCTGATGGGCTCTGTGGCCCTTGAACGAGCCTCTGCCGAAGGCGTGCTGTTGTTGATGAAGTCGTTTTCCGACCTGGCCAAAGAGTGGCGCGAGCATGGGTTC…	MTNNDQYHTLINEICALSLISTPERFYESANFKISEVDFTLQFQDRDEGRAVLIYGDMGALPARGRESALLALMDINFHMFAGAHSPAFSFNAQTGRVLLMGSVALERASAEGVLLLMKSFSDLAKEWREHGFMGQATTVGASTDQPVAPAAKRESLSAPGRFQ	57	+	64860	64892	AGGAACTGAAATGCCTATGCCTGCGACTCAGTG
Pseudomonas syringae	1	PbbICMP4116	PbbICMP4116|ALO86_02099	Cluster_4702.2	Type III secretion related protein	PbbICMP4116_Contig_21	+	12764	13876	1113	370	ATGCAAGCACTTAACAGCATCAGTTCGTTGCAAACCTCTGCATCATTGTTCCCCGTGTCGCTCAACAGCGATGTGAGCGCCAACACCAGCACTTCCAGCAAAGAGCTCAAGGCTGTGATCGATCAGCTGGTTCAGGCGCTGACCCAAAGTGGGCAGCTCGATGAAACCTCACCGCTCGGCAAAATGCTCGCCAAGGCCATGGCTGCGGATGGCAAGTCGGCTAACAGCATCGATGACATCACTGCATCGCTCGACAAGCTGATCCACGAAAAGCTCGGCGACAATTTCGGTGCCTCTGCCGGCATCGGCGCGGGTGGCGGTGGCGGTGGCATTGGCGGGGCGGGTTCTGGTTCGGGTGTCGGTGGCGGTCTGAGCAGCGACGCGGGTGCCGGGCAATCC…	MQALNSISSLQTSASLFPVSLNSDVSANTSTSSKELKAVIDQLVQALTQSGQLDETSPLGKMLAKAMAADGKSANSIDDITASLDKLIHEKLGDNFGASAGIGAGGGGGGIGGAGSGSGVGGGLSSDAGAGQSDLMSQVLNGLGKAVLDDLLTPSGEGGTTFSSDDMPTLEKVAQFMDDNKAQFPTRDGGSWMNELKEDNGLDAQETAQFRSALDVIGQQLGQQQGDASGVTSGGGLGSPVSDSSLGNPAIDANTGPAANGNASVDVGQLIGQLIDRGLQSVSSGGGLGTPVDNSTQPAGGTPAANPTGNVSNQDLGQLLSGLLQRGLEATLQDAGNTGADLQSSAAQVAAQLINALLQGTNNQTNQAVA	442	+	12290	12322	TGGAACCGATTCGCAGGCTGCTGCCACCTAGTG
Pseudomonas syringae	1	PbbICMP4116	PbbICMP4116|ALO86_02100	Cluster_28714.2	Type III secretion related protein	PbbICMP4116_Contig_21	+	13904	14278	375	124	GTGACCATTTCCCAACTCAGCAATTTGAAAAGTGTATCGCCGGAGCTTGGGCAGAATGCTCATCAGGGGCTCGGCTCCGAACCCTTTCAGGCGGATGTCGACCTATTCAATGCGGCGATGCGTCCTGACAGCGGGCCCGCAGCGTCGCACCTGTCCGACCGGATAGCCAGTGCGCTGTCCGAGCGGCTGGGCAGTACCGAGAAGCTTTCACAGCAAGCATTACGCCAGATGAAGAAAGTGTCGAACACCGAAGATCCTGGAGACATCGTGCAGATGAGTCGGGCGTTGTCGCAGTGCTCGTTGCAAATGGCGTTGACGACCAAGGTCGTGAGCAAGAGCGCTCAGGCGCTCGACAAGTTGACCAACCTGCAGTAG	MTISQLSNLKSVSPELGQNAHQGLGSEPFQADVDLFNAAMRPDSGPAASHLSDRIASALSERLGSTEKLSQQALRQMKKVSNTEDPGDIVQMSRALSQCSLQMALTTKVVSKSAQALDKLTNLQ	1582	+	12290	12322	TGGAACCGATTCGCAGGCTGCTGCCACCTAGTG
Pseudomonas syringae	1	PbbICMP4116	PbbICMP4116|ALO86_02102	Cluster_2413.3	Type III secretion related protein	PbbICMP4116_Contig_21	+	15090	15620	531	176	ATGATGAGCCTTTCCGCCGAGGATCACTGGGTCCACTGGTGGTGCAACCCCTGGCAGTGGGCTCATTCGCAGTGGCATGACCGATTCGCCAGCGCTCGGGGGTTGTCGGTCAGTGACTGCGATGCGCTCATGGCCAGCCGTCATGGCGTGTTTCTGCAGAGTCTGGGCATCGACCCGGCTCAGCCGCCAGCGCCCGCGGAACCGGTGCTGCGCTGGTTGGCGCTGACGCCCTCGCAGCGTGAGCAGGCGCTAAGCCTGGCGCAGTGCATCTGCTTCTCCCGTAACGAAAGCGACGGCCCTGACGGTCAATGGTGCTGGGGGTTGACCAAAGCGCTGCGCCCCGGTGTCTGGCTGGAGTTTGAACACGAGGACGCGCGTCTTCTGCTGGGCGCCTGGCTT…	MMSLSAEDHWVHWWCNPWQWAHSQWHDRFASARGLSVSDCDALMASRHGVFLQSLGIDPAQPPAPAEPVLRWLALTPSQREQALSLAQCICFSRNESDGPDGQWCWGLTKALRPGVWLEFEHEDARLLLGAWLGPQYWSRLRLEWPPNEVPDTPGKAPENKLQALWQAIMWRVTAA	2768	+	12290	12322	TGGAACCGATTCGCAGGCTGCTGCCACCTAGTG
Pseudomonas syringae	1	PbbICMP4116	PbbICMP4116|ALO86_02104	Cluster_49085.1	Type III secretion related protein	PbbICMP4116_Contig_21	+	16314	16556	243	80	TTGCTGGAGCACCAGGACATGATCAGTTTCAACAGCTTGCAACGCCATCTCGACAACTCGGTGAGCCGTGCTCACACCAACATGGACCAGGCAGCGATGGAAGCCTCCGAGAGTGGCACCGTCGAAGACCTGCAGGCATTCAACGATGCCCAGCAGCAGGTCGATGTCGCCGGTATTGCCGTCAATGAATGCCTGCGTGCCAAGCACGGTATCAATAAAGCAGTCATCGATGGAATTCAGTGA	MLEHQDMISFNSLQRHLDNSVSRAHTNMDQAAMEASESGTVEDLQAFNDAQQQVDVAGIAVNECLRAKHGINKAVIDGIQ	12	+	16270	16302	TGGAACCGCTCGGCGGGTTTGCTCCACTCAAGG
Pseudomonas syringae	1	PbbICMP4116	PbbICMP4116|ALO86_02114	Cluster_3403.1	Type III secretion related protein	PbbICMP4116_Contig_21	-	24090	24665	576	191	GTGACGATGACCGCACCGATCAAAACCCCGGCCAAAGCGCCACCAGCACCCCAGCGCCCTGCGCCTGTCGAGCGGCCAGCCACAGCTCTGAGCGAAAAACCATTCGGTGAAAAACGCCTTGCATCCGGTGGCTTGGGCCGTGGCGATGTACAGACCAGCCGTTCGGTACTGAGCAAGTCGCTGCAAGACACCCCGATGAGTGCCGACGGCATGTTCTTTTCGCAACTGCTGGTGCCGCCCGTAAGTGCCGAACCTGATCAGCAAGGCTTTGGCGGGGGCGGTATAGCCTTTCCGGTACGCGCAGAACAAGTGCCGACCCAACTGATCGACGAGCTGGCGCAGCGCCTGCCGGATCAGCCTGACGGCCCCCTCAGTTTCACCCTGCTGATGCCCAACCTG…	MTMTAPIKTPAKAPPAPQRPAPVERPATALSEKPFGEKRLASGGLGRGDVQTSRSVLSKSLQDTPMSADGMFFSQLLVPPVSAEPDQQGFGGGGIAFPVRAEQVPTQLIDELAQRLPDQPDGPLSFTLLMPNLGSVRVNANKTENRWSVQLGFARRDVLKRLSAHTGACRDSLSQALGQDVELDMHEDLSA	6042	-	30707	30739	GGGAACTGATCCGGGACCGTGACCCACTCAGCG
Pseudomonas syringae	1	PbbICMP4116	PbbICMP4116|ALO86_02119	Cluster_4852.1	Type III secretion related protein	PbbICMP4116_Contig_21	-	29574	30680	1107	368	ATGAAAATCGTCGCTCCGCCTATCATGCGAATACTTCCGGTCGCGCCGACCCGCGTCGTGACGCCTGCTGCGCAGCCACTTCCCAATGCTGATCTGCACAATTCAGGGACTTCGCCACAACAGGTTTCGCGCTTCGCGGCCGCGCTCATCCAGCACAGACGCATCCTCATTCAGCGCGACCTGATCGCCAGCAACAATGCCTTGCAGTCGCGAGCGGTGAAGCTCGGTGAGCTTTATCAACTGCTGATGACCGATCAGGACACCGGGCTGGATAACGCGGCCAGGGTATTGCGCAAAAAGCTCATGCAGGATGACTCGTCCTCAGATCTGAAACAGGTTCTGGATTACACCGACGGTGATGCCGCCAAGGCTCATGTGGTGTTGCAAGCCGCCAGGAAG…	MKIVAPPIMRILPVAPTRVVTPAAQPLPNADLHNSGTSPQQVSRFAAALIQHRRILIQRDLIASNNALQSRAVKLGELYQLLMTDQDTGLDNAARVLRKKLMQDDSSSDLKQVLDYTDGDAAKAHVVLQAARKQAEADGEMGEHVVLTQQLKQLRRKYGPRARAGINSAKAFARPNIDNKRRVALRNLYSVAVSGQPNITGLIEALLGEQQEAGQFNIDLRDMRTAIADDLSAMTPSASHEQLRTLMHGLNTARHVTTLLKGCEHLLGRMRNKNPDLTVDPPAFLKHLLTLTANGMNVNQTLQLTQHIGGKQLKHQLAFLNGLRPMLLQLPILLWRDMKSRQTALSNLLILMAELTTQEQKQLYGGLV	27	-	30707	30739	GGGAACTGATCCGGGACCGTGACCCACTCAGCG
Pseudomonas syringae	1	PbbICMP4116	PbbICMP4116|ALO86_02121	Cluster_477.1	Type III Effector	PbbICMP4116_Contig_21	+	31565	33907	2343	780	ATGCGTATATCCAGTTCTCCCTTCGTTATCGTGAACCAACCCACCCCTGGCGAACTGGCTCTGGCTGTTGAGTCGCCTCTTGCCAAAGCCTTGCCGACACCTGCGGGTGGCGGTGGGCAAGCCGGCGTGCAGTTCGGTCAGCCGGCCGGCAACACGCAAGGCGCGCCGACAGGAGCCGAGCAGACCGCGTCGTCTATCCTGGCTCTTTTGCTCCAGGGCAGTGGCGGGGCAGCTGCCAATGTCAATGTGAATAATCAGGTCCAGCCGCAACCCTGCGCAGATTCTCCTGCCGAGGCTGCACCGACTGAAGCAACTGCCCCGGCCGCTCCGGTTGAACAGGTCGCAGCTCCCACGAACACAGATGCAACCGACGCTTCCAACGCCCCCAAAGCCGCAGAC…	MRISSSPFVIVNQPTPGELALAVESPLAKALPTPAGGGGQAGVQFGQPAGNTQGAPTGAEQTASSILALLLQGSGGAAANVNVNNQVQPQPCADSPAEAAPTEATAPAAPVEQVAAPTNTDATDASNAPKAADAAFLDNSEYSSPEALKRWEPMVAHLPPEEREQAAKELNRPIAAAWMARDDGPDAGKAMDFINANPALKTAVDVAQGGGNADGKITNKDLKTFAKNMEKAADSADKDLANYTKDNPDADPQSLEMVRSAAVMRANMPLAIAADPHHAVDAADKTKVDGNVDAEDLKGLAQSNPGLSGALKQSCSTWSQPGFLGQVDEAGMSGRKKAAHSPDKMFDAKNLSEWIKKSAPTNGGQFASMLSDSATLNAVAGIDISKLDKDVFDKPKSYS…	32	+	31502	31533	TGGAACCAACTTGCACCTTCAACCACACAGTT
Pseudomonas syringae	1	PbbICMP4116	PbbICMP4116|ALO86_02548	Cluster_7521.1	Type III Effector	PbbICMP4116_Contig_3	+	556	1365	810	269	ATGACAAACGTCTCTGGACACATTGGAAAATACCCGAGCCTCGCTAACGTTCAGGCTGGGTCTTCGGCGTCGGTCGAAAACCAGATGCCTGATCCTGCTCAGCACAGCGATGGTCGGTGGAAACAGCTTCCGACTCAGCTATCGTCTATTGCATTGTCGAGATTTGATCAAGATATTTGCACGAATAATCACGGCATAAGCCAGCGTGCAATGTGCTTTGGCCTTTCGTTGAGCTGGATCAATATGATTCATGCAGGGAAAGACCATGCAACACCCTATGCGTCGGCAGAAAGAATGAGATTTTTGGGGTCATTCGAGGGTGTGGTGCACGCTCGTACTATTCATAACTTTTATCGAACTGAACATAAGTTTCTGTTGGAGCACTCGTCCTCAAATCCC…	MTNVSGHIGKYPSLANVQAGSSASVENQMPDPAQHSDGRWKQLPTQLSSIALSRFDQDICTNNHGISQRAMCFGLSLSWINMIHAGKDHATPYASAERMRFLGSFEGVVHARTIHNFYRTEHKFLLEHSSSNPGVSTGAMAGTESLLQAAEIKGLKLRPVLEDKSNSGLPFLIACKQSGRQIVTDEAALNSLCEAIVENRKGVLVIYSEEIAHALGFSVSPDGKSATLFDPNLGEFHTHSKALADTIENISSADGLTLVGVQIFASKMR	29	+	496	527	GGGAACCGATTCGCTTCTAAAACCACTCAATC
Pseudomonas syringae	1	PbbICMP4116	PbbICMP4116|ALO86_02627	Cluster_2089.1	Type III secretion related protein	PbbICMP4116_Contig_30	-	9395	9787	393	130	ATGAACTCATCACTCACCCTGCAAAAGCTGCTTGATAGGCGTGGTCAGGCGGCCAACGGAAATTCTGCAACGGAGGCCGTACAGTGGCAGGAAGGAATGAACCTGACGCTGCATGTAAGCGGCGATAGCCTCACGATGCTGGCCGAGATCATCGATCTGCGTGCCGACCCTCAGGACGACATCCTCTTGCGCAAGCTGCTTGCCCATGCTTTTCCGGGCCTGCGGCTACGACGCGGCGCGTTGACCATCAACCCGGACGAGAACACGTTGGTGTACTCCTACGAGCATGACTTTCTCGCGCTGGACAAGGCCCGATTCGAAAATCTGCTGGCTAATTTTGCCGAAACAACGCAGGAGTTGCGTAACACCGCGCAGCGCCTGCGTTACCGCTGA	MNSSLTLQKLLDRRGQAANGNSATEAVQWQEGMNLTLHVSGDSLTMLAEIIDLRADPQDDILLRKLLAHAFPGLRLRRGALTINPDENTLVYSYEHDFLALDKARFENLLANFAETTQELRNTAQRLRYR	29	-	9816	9848	GGGAACCACCGCATGGGTTCCGGCCACTCACCG
Pseudomonas syringae	1	PbbICMP4116	PbbICMP4116|ALO86_02800	Cluster_2333.2	Type III Effector	PbbICMP4116_Contig_33	-	85911	86774	864	287	ATGAACATTACGCCGCTCACGTCAGCCGCGGGCAAGGGCTCGTCCGCACAAGGCACAGACAAAATTTCCATTCCCAACTCCACGCGCATGATCAATGCCGCGTCAATCAAGTGGTTGAACAAGGTGCGTAGCGCCATCAGTGACCACATCCGCACCAGCATCGAGAAAGGGAAACTGTTCGAGCTCGCCTCCTTGGGCAGCAACATGTTCGGTGTCCCGGCCCTTTCAGCGCGCCCCTCGACGCTCCAACCTGTGTTGGCGTTTGAGGCCGACCCCAATCACGACCTGAACCTTGTCAGGGTCTATATGCAGGACAGCGCCGGCAAGCTCACTCCCTGGGACCCGACGCCCAACGCGGTCACGACGACGTCGAATCCATCAGAGCCTGATGCGCAGAGC…	MNITPLTSAAGKGSSAQGTDKISIPNSTRMINAASIKWLNKVRSAISDHIRTSIEKGKLFELASLGSNMFGVPALSARPSTLQPVLAFEADPNHDLNLVRVYMQDSAGKLTPWDPTPNAVTTTSNPSEPDAQSDTASSSLPRRPPAGSVLSLLGIALDHAQRHSPRADRSAKGRPGREERNGARFNAKQTKPTEAEAYGDHQTPNPDLHRQKETAQCVAESINSMREQQNGMQRTEARLRAKEALQAREAARKQLLDVLEAIQAGREDSTDKKISATEKNATGINYQ	22	-	86796	86827	AGGAACTCATCACCGCGAATCGCCACTCAGCA
Pseudomonas syringae	1	PbbICMP4116	PbbICMP4116|ALO86_03984	Cluster_4422.1	Type III secretion related protein	PbbICMP4116_Contig_65	+	152585	153559	975	324	ATGACCATGGGTGTTTCACCTATTCGTAACTCAAACTCCCTACCGATCGATTTTTCGTCGTTGAGCGCAAAGAGTGGCGGGCATAACGGGCTGGGCAGCGGAGACAATTCGACTATCGACCCGAGTACGTTGTTGTTCGGCAATCAAGGGCAGACGCAGGTCAATTTCGCTCCGCCCAACAGCACGGACTCCTCAACCAGCGGTGTGAACGCTGCGTCAGGCAATACGGCGTCCGGCCTGGTCGAGCAAATCATGAGCCTGCTGAAACAATTGATGCAGATGCTGATGCAAAACAACAATGCTCCCGGTAACCCTCAGACTGATTCGTCAACGCCAGGCGTCGGCAGTGGCAACAGCGTCGGGAGCGGCGGTACTGGAAGCAGTCTCGCAGGCAGTGAC…	MTMGVSPIRNSNSLPIDFSSLSAKSGGHNGLGSGDNSTIDPSTLLFGNQGQTQVNFAPPNSTDSSTSGVNAASGNTASGLVEQIMSLLKQLMQMLMQNNNAPGNPQTDSSTPGVGSGNSVGSGGTGSSLAGSDGGDETSGVGNGGLGDAGSTPTTSAADGVPSDTSLTGSGGLHLPQQLEQYRGDIMDAAKATGVPPSVIAGQIWAESRGQLNAATTNVNGKADAGLMQVNADTFKSLQQQNPGLLGNDVNDSHTNIMAGALYLRDQNKEFGDMGAALRAYNSGPDKVNKADLSDTGGVGGSSYPADVLNFAKIIESGQGNLPA	89	+	152465	152496	GGGAACCGAGTCACTCAGTGAACCACTCAGTT
Pseudomonas syringae	1	PbbICMP4116	PbbICMP4116|ALO86_04164	Cluster_2089.1	Type III secretion related protein	PbbICMP4116_Contig_74	+	2988	3380	393	130	ATGAGCTTATCGCCGACGCTGCAAAAGCTAACTGATATATTGGGCCCGACAAAAAATGCCAAGCCTGTCACAGAGGCTATCCAGTGGCAGGAAGGCATGGATATAACGCTGCATGTCAGCGGCGACAGCCTTACCTTACTAGCTAACATCATAGAACTGCGTACAGACCCTAAAGACGACATTTTATTGCGCAAGCTGCTTACCCATACGTTTCCGGGCCTACGTCTGCGCCGTGGCGCGCTTACCATCAACCCTGATGAAAGTGCCCTGGTTTTCTCTTATGAACACGATTTTCACCTTCTGGACAAAGCCCGTTTTGAGAGCCTGCTGGCCAACTTTGCTGAAACGGCGCAGGAGCTTCGAGACACAGCGACACATTTTCGTTTTAACTGA	MSLSPTLQKLTDILGPTKNAKPVTEAIQWQEGMDITLHVSGDSLTLLANIIELRTDPKDDILLRKLLTHTFPGLRLRRGALTINPDESALVFSYEHDFHLLDKARFESLLANFAETAQELRDTATHFRFN	28	+	2929	2960	GGGAACGTGTCCGCTGTTACAGCCACTTAGTA
Pseudomonas syringae	1	PbbICMP4116	PbbICMP4116|ALO86_05260	Cluster_2093.1	Type III Effector	PbbICMP4116_Contig_284	+	827	1138	312	104	ATCCAGGAGGTCGACTCAATGCATCGTCCTATCAACGCAGGCCATACCACCTCACGTCTCATCCTAGATCAGTCAAAACAAATATCACGTACTCCATCGGAAAGTAGCGCGCAATCAGCACTTTCTCAGCAAACAAGTATGAGCAGCCCAGTTTTGGAGCGGTCGAAAAGTGCGCCAGCTTTATTGACTGCGGCACAGCGCACGATGCTTGCACAAGTGGGAGCCTGTAACGCTCATCTGACCTCAGATGAAAATATGGCCATCAACGAACTGAGATCACACAAGCCCCTTTTACCTAAGGAAGGTCTGAAG	MQEVDSMHRPINAGHTTSRLILDQSKQISRTPSESSAQSALSQQTSMSSPVLERSKSAPALLTAAQRTMLAQVGACNAHLTSDENMAINELRSHKPLLPKEGLK	10	+	785	817	TGAAACCGAAAGGGCGTTGCTTGCCACACAGCA
Pseudomonas syringae	1	PbbICMP4116	PbbICMP4116|ALO86_05702	Cluster_2089.2	Type III Effector	PbbICMP4116_Contig_74	+	3393	4250	858	285	TTGGATAAAGTGGGGAACAGTGCTCGTGTAGATAATGCCCCGCATGTCGAAGCGCCTGCAGGGCCGGAGCCTATGCGGCTTGATGCTGCCCGAGGCCAGAAGCCCAAAGCCCCTATGGATGCACCGTCATCATTACGTTTGCGAGCGATAGCAGGTGGCATGCCCAGTGAAGAAGCAGGAACGACTGCACCTGCTGACGTGAATCAGCCTCCACCTGCTGATGTTCGTCCAGAAATGGGTGTAGGTCCTGTGAGACTCTTCGTTAAACCGATGGTAGGAACTCTGGCGCTGTCGACAGGAGTCCGTTTTGCAAGATACCCAGGTGATTTCGCGAAGGATCCGGGAGGCAGTGTATGGGCAGCAATCAATCTGCAGCATCGCTCGAGCGTCACACATCTT…	MDKVGNSARVDNAPHVEAPAGPEPMRLDAARGQKPKAPMDAPSSLRLRAIAGGMPSEEAGTTAPADVNQPPPADVRPEMGVGPVRLFVKPMVGTLALSTGVRFARYPGDFAKDPGGSVWAAINLQHRSSVTHLEQGNKTVLERFGAHIPKDSACFKARADVTHDVPSGVAGQWNHKTQRVKLNPNIHFESHPAQVAGHEFIHCYTHPEFVERHIKHPHWKALNEGLTTRLTEKLPDPKRLLPIPLAKDPYHGFKLSNRGLLAGCGQANRRRSWRRCVVESVLWRR	433	+	2929	2960	GGGAACGTGTCCGCTGTTACAGCCACTTAGTA
Pseudomonas syringae	1	PbbICMP4116	PbbICMP4116|ALO86_100695	Cluster_2594.1	Type III Effector	PbbICMP4116_Contig_30	+	19655	20365	711	236	ATCTCAAGCAATCACATACTCGTCAGATCAACTCAATTAGCTTTCAGGATAACTATGATCACTCCGTCTCGATATCCAGGCATCTATATCGCCCCCCTCAGTAACGAACCGACAGCAGCTCACGCATTTAAAGAACAAGCAGAGGAAGCACTTGACCATATCAGCGCCGCACCCTCTGGCGATAAGCTATTGCGAAAAATATCCACTCTTGCCAGTCAAAAAGATAGAAAAGTCACGCTAAAAGAGATTGAAATAAATAACCAGTGTTATACCGAAGCTGTTCTGAGCAGGAGGCAACTGGAAAAGTACGAACCAGAAAACTTTAACGAGAACCGGCACATTGCATCACAGCTATCACGAAAGGGGACCTTTACCAAAGGTGAAGGAAGCAACGCGATT…	MSSNHILVRSTQLAFRITMITPSRYPGIYIAPLSNEPTAAHAFKEQAEEALDHISAAPSGDKLLRKISTLASQKDRKVTLKEIEINNQCYTEAVLSRRQLEKYEPENFNENRHIASQLSRKGTFTKGEGSNAIIGWSPDKASIRLNQNGSPLHLGMDNDDKITTLAHELVHARHVLGGSSLADGGDRYNPRTGSGKEELRAVGLDKYRYSLTKKPSENSIRAEHGLPLRMKYRAHQ	126	+	19497	19529	TGGAACCGAATCCATCTCGAGGGCCACTCAAGG
Pseudomonas syringae	1	PbbICMP4116	PbbICMP4116|ALO86_200054	Cluster_3875.2	Type III Effector	PbbICMP4116_Contig_185	-	2688	3821	1134	377	ATGCAAATAAAGAACAGTCATCTCTATTCAGCTTCAAGAATGGTGCAGAATACTTTTAATGCCTCGCCTAAGATGGAAGCAACTAATGCAATAGCAAAAAATAATGAACCTGCTGCGCTGAGCGCTACGCAAACTGCAAAGACACACGAAGGCGATTCAAAAGGCCAATCCAGCAATAACTCTAAATTGCCCTTCCGCGCCATGAGGTACGCTGCATACCTTGCAGGCAGCGCCTACCTCTACGATAAAACTGCCAATAATTTTTTTCTTTCTACCACTTCTCTGCATGATGGCAAAGGTGGTTTTACCAGCGATGCCAGGCTTAACGATGCACAAGATAAAGCGCGAAAGCGCTACCAAAACAACCATAGCAGCACTCTTGAAAATAAGAACTCGCTT…	MQIKNSHLYSASRMVQNTFNASPKMEATNAIAKNNEPAALSATQTAKTHEGDSKGQSSNNSKLPFRAMRYAAYLAGSAYLYDKTANNFFLSTTSLHDGKGGFTSDARLNDAQDKARKRYQNNHSSTLENKNSLLSPLRLCGENQFLTMIDYRAATKIYLSDLVDTEQAHTSILKNIMCLKGELTNEEAIKKLNPEKTPKDFDLTNSEAYISKNKYSLTGVKNEETGSTGYTSRSITKPFVEKGLKHFIEATHGEKALTPKQCMETLDNLLRKSITLNSDSQFAAGQALLVFRQVYAGEDAWGDAERVILKSHYNRGTVLQDEADKIELSRPFSEQDLAKNMFKRNTSIAGPVLYHAYIYIQEKIFKLPPRQNRRFET	48	-	3869	3901	TGGAACTCTACGCTTGGCGATGACCACGTATGA
Pseudomonas syringae	1	PbbICMP4116	PbbICMP4116|ALO86_200168	Cluster_12725.1	Type III Effector	PbbICMP4116_Contig_258	+	8007	9023	1017	338	ATGCAGAATCATGTCATTATTTCCAGAGGCGCCACACCTTTGTCGAGAGGAGTTACAGCCAGCGATGTCAAGCCTGCTTATGCGCAATTGACACCCGAAGCTTATCGACACGCAATAACGAAATTCAAACAAGCACTGACCACCCCGGAGCGGCCAACCGGCGAACCCGTTTTCATCTACGACCGCACACCAGGCGAATTGGAAAATTTTCGTTCTTCGGACAGTTTTATCCTCCCTCATGACCTCAATCAGAAAGGCTGGGACACGCTGCACATTTCCGGCAGTGCCAGTATCGCCAGTTTGGAGCAAGTGCAACGTTTGCATCCCACCCCCGAAAGACCAGTCGTGGTATTGGACGTACGAGAGGAATCTCACGCGATCGTTGGGGGTTATCCATGT…	MQNHVIISRGATPLSRGVTASDVKPAYAQLTPEAYRHAITKFKQALTTPERPTGEPVFIYDRTPGELENFRSSDSFILPHDLNQKGWDTLHISGSASIASLEQVQRLHPTPERPVVVLDVREESHAIVGGYPCTWRLGNNWANVGKSRNDVIADEQSRIAALKQQPTVEIVHRKDAKHGLDNPRKVVLNNPDISSEEDLVKSTGAEYLRLMVTDHMGPRSEDIDLFVAMERALPEQGRVHIHCGVGQGRTGIFIAMHDMLKNAHHVSFHDLIERQLVFNPGRALDFNKDVTHEGRANLRNDRLEFISLFYEYAKQNPKGAPRSWSEWLADPNTPSQQR	28	+	7948	7979	TGGAACCGTTGGAGCATATGCACCACGAAGGA
Pseudomonas syringae	1	PbbICMP4116	PbbICMP4116|ALO86_200302	Cluster_3875.2	Type III Effector	PbbICMP4116_Contig_58	+	1159	2640	1482	493	ATGCAAATAAAGAACAGTCATCTCTCTTCAGCTTCAAGAATGGTGCAGACTACTTTTAATGCATCGCCTAAGATAGAAGTAACTAATACAATAGCGAAAAATAATGAACCCGCTGCGCTGAGCGCTACGCAAACCGCAAAGACACACGAAGGCGATTCAAAAGGCCAATCCAGCAATAACTCTAAATTGCCGTTCCGCGCCATGAGGTACGCTGCATACCTTGCAGGCAGCGCCTACCTCTACGATAAAACTGCCAATAATTTTTTTCTTTCTACCACTTCTCTGCATGATGGCAAATGTGGTTTTACCAGCGATGCCAGGCTTAACGATGCACAAGACAAAGCGCGAAAGCGCTACCAAAACAACCATAGCAGCACTCTTGAAAATAATAACTCGCTT…	MQIKNSHLSSASRMVQTTFNASPKIEVTNTIAKNNEPAALSATQTAKTHEGDSKGQSSNNSKLPFRAMRYAAYLAGSAYLYDKTANNFFLSTTSLHDGKCGFTSDARLNDAQDKARKRYQNNHSSTLENNNSLLSPLRLCGENQFLTMIDYRAATKEYLSDLVDTEQAHSSILKNIMCLKGELTNEEAIKKLNPEKIPKDFDLTNSEAYISKNKYSLTGVRNEETGSTGYTSRSITKPFVEKGLKHFIEETHGEKALTPKQCMETLDNLLRKNITLNSDSQFAAGQALLVFRQVYAGEDTWGDAERIILKSHYDRGTVLQDEADKIELSRPFSEQDLAKSVFKRNTSIAGPVLYHAYIYIQEKIFKLPLDKIEDLKHKSMSDLKNLTLTHVKLIDSGVG…	48	+	1079	1111	TGGAACTCTACGCTTGGCGACGACCACTTATAG
Pseudomonas syringae	1	PbbICMP4116	PbbICMP4116|ALO86_200307	Cluster_12167.1	Type III Effector	PbbICMP4116_Contig_64	+	11900	12151	252	83	ATGAATCGCATTTCAACCAGCTCAGTAAATTCCAGCTTCAAATACACGGCCCCTACGAAGGAAGCGCAAAACCGCTTCGCCTCAGCGCCCGACAATTCCCCTCTAGTTGCCACCACAACATCTATCACCCAAACCCTCGTGCAGCCTGGTCGACTCGATAAAAACCACCGTCTGATGGATTCCAAAATCATCAATTTTTCAGTCGCATTTAATCTCGGCCGGACGCGCTCGATTGCTGGTGGCAGTGCATGA	MNRISTSSVNSSFKYTAPTKEAQNRFASAPDNSPLVATTTSITQTLVQPGRLDKNHRLMDSKIINFSVAFNLGRTRSIAGGSA	82	+	11786	11818	AGGAACTGCAAGCTGGTGCGGCTCCACTAAAAC
Pseudomonas syringae	1	PbbICMP8899	PbbICMP8899|ALQ83_00886	Cluster_452.1	Type III Effector	PbbICMP8899_Contig_147	+	1323	7196	5874	1957	ATGGTCAAGGTTACCTCTTCCGGATTTACTGCCAACCCTCTCTCTCATCATGCGGACAGTGTTTCCCCCGCGAACAGTCCCCCTCAGTTACCGGAGCCTGTGCCTCTGGTTGATCTAAGCGAGTCGTCCCGCAAGGGCGGCATGCGAAATCGGCCGCATGCCAGTTTGAACAGTCAGATGCTCGGACTGCAAGCGGTGCCGTCGCAACGCGGAAAGCATGTTCGTGTCAGAAGTCATGCCGATGGCGAGAGTGTCATTAACGCCTGGCTGGCAAAGCGACCCTCGGTTCAAAGCGAAACCAGCCTTGGTAACGATGGCAAGCTGGTGCGTTATAACGCTGTGAGTCATGAACCGCTGGCGCCGCGCAATGAGGCGTTTTTCACCTATGTACCGGGGATG…	MVKVTSSGFTANPLSHHADSVSPANSPPQLPEPVPLVDLSESSRKGGMRNRPHASLNSQMLGLQAVPSQRGKHVRVRSHADGESVINAWLAKRPSVQSETSLGNDGKLVRYNAVSHEPLAPRNEAFFTYVPGMLMAVLTVHPEMEHGISGDITADAVAARLAEPPIGLLTGVWQSSHDRAYLERGGVVHTANMEERWAPLTLPGMDPREPLRMAGLQADGGVYLHNGSQLWRLTETAAESVTTENLPEGAAVRIGAGGEVHGLHEGALHSNGISRPIELWRPKAGAPGREQSPARPVDLLPLPGGTAALILDDKGRIYHADLKGTGAVEAHRLKLPADFAQGKGWAVTAMGLSRDDTVHLMLQDQNGRRMSLQRAPGEALFRPAYLLDRPLLLLYTEGL…	173	+	1119	1150	CGGAACCGATCCGGTTGTCTGGCCACTCAATT
Pseudomonas syringae	1	PbbICMP8899	PbbICMP8899|ALQ83_00961	Cluster_477.1	Type III Effector	PbbICMP8899_Contig_162	-	2788	5130	2343	780	ATGCGTATATCCAGTTCTCCCTTCGTTATCGTGAACCAACCCACCCCTGGCGAACTGGCTCTGGCTGTTGAGTCGCCTCTTGCCAAAGCCTTGCCGACACCTGCGGGTGGCGGTGGGCAAGCCGGCGTGCAGTTCGGTCAGCCGGCCGGCAACACGCAAGGCGCGCCGACAGGAGCCGAGCAGACCGCGTCGTCTATCCTGGCTCTTTTGCTCCAGGGCAGTGGCGGGGCAGCTGCCAATGTCAATGTGAATAATCAGGTCCAGCCGCAACCCTGCGCAGATTCTCCTGCCGAGGCTGCACCGACTGAAGCAACTGCCCCGGCCGCTCCGGTTGAACAGGTCGCAGCTCCCACGAACACAGATGCAACCGACGCTTCCAACGCCCCCAAAGCCGCAGAC…	MRISSSPFVIVNQPTPGELALAVESPLAKALPTPAGGGGQAGVQFGQPAGNTQGAPTGAEQTASSILALLLQGSGGAAANVNVNNQVQPQPCADSPAEAAPTEATAPAAPVEQVAAPTNTDATDASNAPKAADAAFLDNSEYSSPEALKRWEPMVAHLPPEEREQAAKELNRPIAAAWMARDDGPDAGKAMDFINANPALKTAVDVAQGGGNADGKITNKDLKTFAKNMEKAADSADKDLANYTKDNPDADPQSLEMVRSAAVMRANMPLAIAADPHHAVDAADKTKVDGNVDAEDLKGLAQSNPGLSGALKQSCSTWSQPGFLGQVDEAGMSGRKKAAHSPDKMFDAKNLSEWIKKSAPTNGGQFASMLSDSATLNAVAGIDISKLDKDVFDKPKSYS…	32	-	5162	5193	TGGAACCAACTTGCACCTTCAACCACACAGTT
Pseudomonas syringae	1	PbbICMP8899	PbbICMP8899|ALQ83_00963	Cluster_4852.1	Type III secretion related protein	PbbICMP8899_Contig_162	+	6015	7121	1107	368	ATGAAAATCGTCGCTCCGCCTATCATGCGAATACTTCCGGTCGCGCCGACCCGCGTCGTGACGCCTGCTGCGCAGCCACTTCCCAATGCTGATCTGCACAATTCAGGGACTTCGCCACAACAGGTTTCGCGCTTCGCGGCCGCGCTCATCCAGCACAGACGCATCCTCATTCAGCGCGACCTGATCGCCAGCAACAATGCCTTGCAGTCGCGAGCGGTGAAGCTCGGTGAGCTTTATCAACTGCTGATGACCGATCAGGACACCGGGCTGGATAACGCGGCCAGGGTATTGCGCAAAAAGCTCATGCAGGATGACTCGTCCTCAGATCTGAAACAGGTTCTGGATTACACCGACGGTGATGCCGCCAAGGCTCATGTGGTGTTGCAAGCCGCCAGGAAG…	MKIVAPPIMRILPVAPTRVVTPAAQPLPNADLHNSGTSPQQVSRFAAALIQHRRILIQRDLIASNNALQSRAVKLGELYQLLMTDQDTGLDNAARVLRKKLMQDDSSSDLKQVLDYTDGDAAKAHVVLQAARKQAEADGEMGEHVVLTQQLKQLRRKYGPRARAGINSAKAFARPNIDNKRRVALRNLYSVAVSGQPNITGLIEALLGEQQEAGQFNIDLRDMRTAIADDLSAMTPSASHEQLRTLMHGLNTARHVTTLLKGCEHLLGRMRNKNPDLTVDPPAFLKHLLTLTANGMNVNQTLQLTQHIGGKQLKHQLAFLNGLRPMLLQLPILLWRDMKSRQTALSNLLILMAELTTQEQKQLYGGLV	27	+	5956	5988	GGGAACTGATCCGGGACCGTGACCCACTCAGCG
Pseudomonas syringae	1	PbbICMP8899	PbbICMP8899|ALQ83_00967	Cluster_3403.1	Type III secretion related protein	PbbICMP8899_Contig_162	+	12030	12605	576	191	GTGACGATGACCGCACCGATCAAAACCCCGGCCAAAGCGCCACCAGCACCCCAGCGCCCTGCGCCTGTCGAGCGGCCAGCCACAGCTCTGAGCGAAAAACCATTCGGTGAAAAACGCCTTGCATCCGGTGGCTTGGGCCGTGGCGATGTACAGACCAGCCGTTCGGTACTGAGCAAGTCGCTGCAAGACACCCCGATGAGTGCCGACGGCATGTTCTTTTCGCAACTGCTGGTGCCGCCCGTAAGTGCCGAACCTGATCAGCAAGGCTTTGGCGGGGGCGGTATAGCCTTTCCGGTACGCGCAGAACAAGTGCCGACCCAACTGATCGACGAGCTGGCGCAGCGCCTGCCGGATCAGCCTGACGGCCCCCTCAGTTTCACCCTGCTGATGCCCAACCTG…	MTMTAPIKTPAKAPPAPQRPAPVERPATALSEKPFGEKRLASGGLGRGDVQTSRSVLSKSLQDTPMSADGMFFSQLLVPPVSAEPDQQGFGGGGIAFPVRAEQVPTQLIDELAQRLPDQPDGPLSFTLLMPNLGSVRVNANKTENRWSVQLGFARRDVLKRLSAHTGACRDSLSQALGQDVELDMHEDLSA	6042	+	5956	5988	GGGAACTGATCCGGGACCGTGACCCACTCAGCG
Pseudomonas syringae	1	PbbICMP8899	PbbICMP8899|ALQ83_00974	Cluster_49085.1	Type III secretion related protein	PbbICMP8899_Contig_162	-	20139	20381	243	80	TTGCTGGAGCACCAGGACATGATCAGTTTCAACAGCTTGCAACGCCATCTCGACAACTCGGTGAGCCGTGCTCACACCAACATGGACCAGGCAGCGATGGAAGCCTCCGAGAGTGGCACCGTCGAAGACCTGCAGGCATTCAACGATGCCCAGCAGCAGGTCGATGTCGCCGGTATTGCCGTCAATGAATGCCTGCGTGCCAAGCACGGTATCAATAAAGCAGTCATCGATGGAATTCAGTGA	MLEHQDMISFNSLQRHLDNSVSRAHTNMDQAAMEASESGTVEDLQAFNDAQQQVDVAGIAVNECLRAKHGINKAVIDGIQ	12	-	20393	20425	TGGAACCGCTCGGCGGGTTTGCTCCACTCAAGG
Pseudomonas syringae	1	PbbICMP8899	PbbICMP8899|ALQ83_00976	Cluster_2413.3	Type III secretion related protein	PbbICMP8899_Contig_162	-	21075	21605	531	176	ATGATGAGCCTTTCCGCCGAGGATCACTGGGTCCACTGGTGGTGCAACCCCTGGCAGTGGGCTCATTCGCAGTGGCATGACCGATTCGCCAGCGCTCGGGGGTTGTCGGTCAGTGACTGCGATGCGCTCATGGCCAGCCGTCATGGCGTGTTTCTGCAGAGTCTGGGCATCGACCCGGCTCAGCCGCCAGCGCCCGCGGAACCGGTGCTGCGCTGGTTGGCGCTGACGCCCTCGCAGCGTGAGCAGGCGCTAAGCCTGGCGCAGTGCATCTGCTTCTCCCGTAACGAAAGCGACGGCCCTGACGGTCAATGGTGCTGGGGGTTGACCAAAGCGCTGCGCCCCGGTGTCTGGCTGGAGTTTGAACACGAGGACGCGCGTCTTCTGCTGGGCGCCTGGCTT…	MMSLSAEDHWVHWWCNPWQWAHSQWHDRFASARGLSVSDCDALMASRHGVFLQSLGIDPAQPPAPAEPVLRWLALTPSQREQALSLAQCICFSRNESDGPDGQWCWGLTKALRPGVWLEFEHEDARLLLGAWLGPQYWSRLRLEWPPNEVPDTPGKAPENKLQALWQAIMWRVTAA	2762	-	24367	24399	TGGAACCGATTCGCAGGCTGCTGCCACCTAGTG
Pseudomonas syringae	1	PbbICMP8899	PbbICMP8899|ALQ83_00978	Cluster_28714.2	Type III secretion related protein	PbbICMP8899_Contig_162	-	22417	22791	375	124	GTGACCATTTCCCAACTCAGCAATTTGAAAAGTGTATCGCCGGAGCTTGGGCAGAATGCTCATCAGGGGCTCGGCTCCGAACCCTTTCAGGCGGATGTCGACCTATTCAATGCGGCGATGCGTCCTGACAGCGGGCCCGCAGCGTCGCACCTGTCCGACCGGATAGCCAGTGCGCTGTCCGAGCGGCTGGGCAGTACCGAGAAGCTTTCACAGCAAGCATTACGCCAGATGAAGAAAGTGTCGAACACCGAAGATCCTGGAGACATCGTGCAGATGAGTCGGGCGTTGTCGCAGTGCTCGTTGCAAATGGCGTTGACGACCAAGGTCGTGAGCAAGAGCGCTCAGGCGCTCGACAAGTTGACCAACCTGCAGTAG	MTISQLSNLKSVSPELGQNAHQGLGSEPFQADVDLFNAAMRPDSGPAASHLSDRIASALSERLGSTEKLSQQALRQMKKVSNTEDPGDIVQMSRALSQCSLQMALTTKVVSKSAQALDKLTNLQ	1576	-	24367	24399	TGGAACCGATTCGCAGGCTGCTGCCACCTAGTG
Pseudomonas syringae	1	PbbICMP8899	PbbICMP8899|ALQ83_00979	Cluster_4702.2	Type III secretion related protein	PbbICMP8899_Contig_162	-	22819	23925	1107	368	ATGCAAGCACTTAACAGCATCAGTTCGTTGCAAACCTCTGCATCATTGTTCCCCGTGTCGCTCAACAGCGATGTGAGCGCCAACACCAGCACTTCCAGCAAAGAGCTCAAGGCTGTGATCGATCAGCTGGTTCAGGCGCTGACCCAAAGTGGGCAGCTCGATGAAACCTCACCGCTCGGCAAAATGCTCGCCAAGGCCATGGCTGCGGATGGCAAGTCGGCTAACAGCATCGATGACATCACTGCATCGCTCGACAAGCTGATCCACGAAAAGCTCGGCGACAATTTCGGTGCCTCTGCCGGCATCGGCGCGGGTGGCGGTGGCATTGGCGGGGCGGGTTCTGGTTCGGGTGTCGGTGGCGGTCTGAGCAGCGACGCGGGTGCCGGGCAATCCGATCTG…	MQALNSISSLQTSASLFPVSLNSDVSANTSTSSKELKAVIDQLVQALTQSGQLDETSPLGKMLAKAMAADGKSANSIDDITASLDKLIHEKLGDNFGASAGIGAGGGGIGGAGSGSGVGGGLSSDAGAGQSDLMSQVLNGLGKAVLDDLLTPSGEGGTTFSSDDMPTLEKVAQFMDDNKAQFPTRDGGSWMNELKEDNGLDAQETAQFRSALDVIGQQLGQQQGDASGVTSGGGLGSPVSDSSLGNPAIDANTGPAANGNASVDVGQLIGQLIDRGLQSVSSGGGLGTPVDNSTQPAGGTPAANPTGNVSNQDLGQLLSGLLQRGLEATLQDAGNTGADLQSSAAQVAAQLINALLQGTNNQTNQAVA	442	-	24367	24399	TGGAACCGATTCGCAGGCTGCTGCCACCTAGTG
Pseudomonas syringae	1	PbbICMP8899	PbbICMP8899|ALQ83_00983	Cluster_418.1	Type III Effector	PbbICMP8899_Contig_162	+	29099	34486	5388	1795	GTGCAGTCACCATCGATCCACCGGAACACCGGAAGCATCATTCAGCCAACCGTCACCCCTGACGCACGTGCTGCAACTGATCTGCAGCAAAGAGCCGAACAACCCAGGCAACGCTCTTCGCACTCGTTGAGCAGTGTCGGCAAGCGGGCGCTGAAAAGCGTCGGTAAATTGTTCCAGAAATCCAAAGCGCCGCAGCAGAAAGCCGCCACGCCGCCCACCGCGAAAAACGTCAAAACGCCCCCGCCTGCTTCAAATGTGGCTACGCCCAGAAACAAAGCCCGCGAATCCGGTTTTTCCAACAGCAGCCCGCAAAATACCCATAGCGCACCCAAGTCGATTCTGCGTAACCACCCCAACCAGGCGAGCAGCTCGGGCGCGCAGACGCATGAAATACACCCG…	MQSPSIHRNTGSIIQPTVTPDARAATDLQQRAEQPRQRSSHSLSSVGKRALKSVGKLFQKSKAPQQKAATPPTAKNVKTPPPASNVATPRNKARESGFSNSSPQNTHSAPKSILRNHPNQASSSGAQTHEIHPEAAPRKNLRVRFDLPQDRLERSPSYLDSDNPMTDEEAVANATRQFRSPDSRLQGSDGTRISMLATDPDQPSSSGSKIGDSDGPIPPREPMLWRSNGGRFELKDEKLVRNSEPQGSIQLDAKGKPDFSTFNTPGLAPLLDSILATPKQTYLAHQSKDGVHGHQLLQANGHLLHLAQDDSSLAVIRSSNEALLIEGKKPPAVKMEREDGNIHIDTASGRKTQELPGKAHIAHITNVLLSHDGERMRVHEDRLYQFDPISTRWKIPEGL…	67	+	29001	29032	TGAAACCCGCTGGCATTGCATGCCACTCATCC
Pseudomonas syringae	1	PbbICMP8899	PbbICMP8899|ALQ83_02849	Cluster_7521.1	Type III Effector	PbbICMP8899_Contig_445	+	541	1251	711	236	ATGACAAACGTCTCTGGACACATTGGAAAATACCCGAGCCTCGCTAACGTTCAGGCTGGGTCTTCGGCGTCGGTCGAAAACCAGATGCCTGATCCTGCTCAGCACAGCGATGGTCGGTGGAAACAGCTTCCGACTCAGCTATCGTCTATTGCATTGTCGAGATTTGATCAAGATATTTGCACGAATAATCACGGCATAAGCCAGCGTGCAATGTGCTTTGGCCTTTCGTTGAGCTGGATCAATATGATTCATGCAGGGAAAGACCATGCAACACCCTATGCGTCGGCAGAAAGAATGAGATTTTTGGGGTCATTCGAGGGTGTGGTGCACGCTCGTACTATTCATAACTTTTATCGAACTGAACATAAGTTTCTGTTGGAGCACTCGTCCTCAAATCCC…	MTNVSGHIGKYPSLANVQAGSSASVENQMPDPAQHSDGRWKQLPTQLSSIALSRFDQDICTNNHGISQRAMCFGLSLSWINMIHAGKDHATPYASAERMRFLGSFEGVVHARTIHNFYRTEHKFLLEHSSSNPGVSTGAMAGTESLLQAAEIKGLKLRPVLEDKSNSGLPFLIACKQSGRQIVTDEAALNSLCEAIVENRKGVLVIYSEEIAHALGFSVSPDGKSATLFDPNLGKL	29	+	481	512	GGGAACCGATTCGCTTCTAAAACCACTCAATC
Pseudomonas syringae	1	PbbICMP8899	PbbICMP8899|ALQ83_03075	Cluster_4528.1	Type III secretion related protein	PbbICMP8899_Contig_50	-	63378	64652	1275	424	ATGAGCATCGGCATCACACCCCGGCCGCAACAGACCACCACGCCACTCGATTTTTCGGCGCTAAGCGGCAAGAGTCCTCAACCAAACACGTTCGGCGAGCAGAACACTCAGCAAGCGATCGACCCGAGTGCACTGTTATTCGGCAGCGACACACAGAAAGACGTCAACTTCGGCACGCCCGACAGCACCGTCCAGAATCCGCAGGACGCCAGCAAGCCCAACGACAGCCAGTCCAACATCGCTAAATTGATCAGTGCATTGATCATGTCGTTGCTGCAGATGCTCACCAACTCCAATAAAAAGCAGGATGCCAATCAGGAGCAGCCTGATAGCCAGGCTCCTTTCCAGAACAACGGCGGGCTCGGTACACCGTCGGCCGATAGCGGGGGCGGCGGTACA…	MSIGITPRPQQTTTPLDFSALSGKSPQPNTFGEQNTQQAIDPSALLFGSDTQKDVNFGTPDSTVQNPQDASKPNDSQSNIAKLISALIMSLLQMLTNSNKKQDANQEQPDSQAPFQNNGGLGTPSADSGGGGTPDATGGGGGDTPSATGGGGGDTPTATGGGGSGGGGTPTATGGGGGGTPTATGGGEGGVTPQITPQLANPNRTSGTGSVSDTAGSTEQAGKINVVKDTIKVGAGEVFDGHGATFTADKSMGNGDQGENQKPMFELAEGATLKNVNLGENEVDGIHVKAKNAQEVTIDNVHAQNVGEDLITVKGEGGAAVTNLNIKNSSAKGADDKVVQLNANTHLKVDNFKADDFGTMVRTNGGKQFDDMSIELNGIEANHGKFALVKSDSDDLKLA…	122	-	64774	64804	GGGAACCGGTCGCTGCGCTTTGCCACTCACT
Pseudomonas syringae	1	PbbICMP8899	PbbICMP8899|ALQ83_03076	Cluster_3390.2	Type III secretion related protein	PbbICMP8899_Contig_50	+	64958	65452	495	164	ATGACCAACAATGACCAGTACCACACCCTTATCAACGAAATCTGCGCACTCAGCCTGATTTCCACACCTGAACGTTTCTATGAATCTGCCAATTTCAAAATCAGCGAAGTGGACTTCACCCTGCAGTTTCAGGACCGCGACGAAGGCCGTGCCGTTCTGATCTACGGTGACATGGGCGCGTTGCCCGCGCGCGGCCGTGAGAGCGCGTTGCTGGCGTTGATGGACATCAACTTTCACATGTTCGCGGGCGCCCACAGCCCGGCATTTTCCTTTAATGCGCAGACCGGTCGTGTGCTGCTGATGGGCTCTGTGGCCCTTGAACGAGCCTCTGCCGAAGGCGTGCTGTTGTTGATGAAGTCGTTTTCCGACCTGGCCAAAGAGTGGCGCGAGCATGGGTTC…	MTNNDQYHTLINEICALSLISTPERFYESANFKISEVDFTLQFQDRDEGRAVLIYGDMGALPARGRESALLALMDINFHMFAGAHSPAFSFNAQTGRVLLMGSVALERASAEGVLLLMKSFSDLAKEWREHGFMGQATTVGASTDQPVAPAAKRESLSAPGRFQ	57	+	64869	64901	AGGAACTGAAATGCCTATGCCTGCGACTCAGTG
Pseudomonas syringae	1	PbbICMP8899	PbbICMP8899|ALQ83_03388	Cluster_3432.1	Type III Effector	PbbICMP8899_Contig_66	-	2734	3636	903	300	ATGAAAATATCCGGCTCCACATCGCCTGCACACACTTCAACGAATTCCGCGCAGAAGTCCTCTTCAAAAGGGCTGCTGAGTGGTTTGGCCAAGCATTTCAAAGGGATGCTCGTTTCTGGCAACACTTCTGGTCATTCGGCGCTCGGGCATTACGCGTCATCCAGCAGCGGCTCCAAAGGCAAGGCACCGGTACGGGACGATTACAGCAACGGACCGCAAACACGCCTTAACAACACACCTCTGAAACGAGCACTGGCCCGAGAGCTTGATCGCTTTGGCTACGGTTCATCGGCGACCGAGTCTTTTGACCGCTCATTGCAGCTTAAGGATAAAAATCCAGAGCTTGGTCACCTTGATGACGACGAGTACCTCGCTTTGCGCATGTACACAACGCCGTTT…	MKISGSTSPAHTSTNSAQKSSSKGLLSGLAKHFKGMLVSGNTSGHSALGHYASSSSGSKGKAPVRDDYSNGPQTRLNNTPLKRALARELDRFGYGSSATESFDRSLQLKDKNPELGHLDDDEYLALRMYTTPFYRAVNHQLRDGKPSEDMKVVVEAMNKGLKRLAEHPDNVVKETLYRGINKVVDDKFIHKNFKLGEVYRDKTFVSATPDLSTVNATFTRHTVKSSKAKASAPVYQRSPLLEIESRSAVRVRQVSLSSAEEEGIFAPDTPFLVADKSRTDSGRWHIKLKEIDESDESSGL	516	-	4152	4183	TGGAACCGGACGAGGCTTTTTACCACTCAATG
Pseudomonas syringae	1	PbbICMP8899	PbbICMP8899|ALQ83_03488	Cluster_406.1	Type III Effector	PbbICMP8899_Contig_68	+	1628	5713	4086	1361	ATGACCTTAAGAATCAATACTCGTTCTGCTACCCCGGTTGTACCTCTGGAAACAGGCTCTTCGTCGCAGCCGGCACCGCCGCCTGTCACGGCAAGAGCGACTGAGCCTCCCCCCGTCGCCAATCCTGCGGCGCCTAAATCAGCGCCAGGTGTTCAGCAAGCACACGGGCTGAAGACGCGCATCGCTGGCAAACTTTCCGAACGTCAGACCAATTTCAGTCTTGGTATTCCCGGCACCGGTCGTACTCTCAACCGGCCCCTGCGCAGCGGGATTCCGGAGGAAGGTGAGCAGGTATCGAACGAGGAGAGTCATGATCCGTTGCTCAAGGAAGCGCATGAACTGCAGCGCATGGTGGAGTCGGCGCTGACCCATCTGAAGGCGGCACCGACGTCTCTCTGG…	MTLRINTRSATPVVPLETGSSSQPAPPPVTARATEPPPVANPAAPKSAPGVQQAHGLKTRIAGKLSERQTNFSLGIPGTGRTLNRPLRSGIPEEGEQVSNEESHDPLLKEAHELQRMVESALTHLKAAPTSLWERPAPSTVRRITTKVFPWLKPAPLREVASNGSNAKTKIKINSQQSPETIAAAVKELSTRLDHQSKVLATATHALVAAREHLESLEQATPPSSTERLDHARARVQQADSTTRLASQQLRELIQGTDVLQLGALSEGQDQVEQKAEFSQQWLSELRTRMQAVDVRFADRHTAIEIELQLKVAQTRELISLDHDMTAAEHTAAQANTQLSALRAQRQETPEGSDEADRLDTAIGQTLATRSQAMQTHQQLAKRLVRVDADVARLNDELG…	277	+	1320	1351	CGGAACCGAATCCATATTTCGACCACCCATCC
Pseudomonas syringae	1	PbbICMP8899	PbbICMP8899|ALQ83_03623	Cluster_2333.2	Type III Effector	PbbICMP8899_Contig_69	-	85911	86774	864	287	ATGAACATTACGCCGCTCACGTCAGCCGCGGGCAAGGGCTCGTCCGCACAAGGCACAGACAAAATTTCCATTCCCAACTCCACGCGCATGATCAATGCCGCGTCAATCAAGTGGTTGAACAAGGTGCGTAGCGCCATCAGTGACCACATCCGCACCAGCATCGAGAAAGGGAAACTGTTCGAGCTCGCCTCCTTGGGCAGCAACATGTTCGGTGTCCCGGCCCTTTCAGCGCGCCCCTCGACGCTCCAACCTGTGTTGGCGTTTGAGGCCGACCCCAATCACGACCTGAACCTTGTCAGGGTCTATATGCAGGACAGCGCCGGCAAGCTCACTCCCTGGGACCCGACGCCCAACGCGGTCACGACGACGTCGAATCCATCAGAGCCTGATGCGCAGAGC…	MNITPLTSAAGKGSSAQGTDKISIPNSTRMINAASIKWLNKVRSAISDHIRTSIEKGKLFELASLGSNMFGVPALSARPSTLQPVLAFEADPNHDLNLVRVYMQDSAGKLTPWDPTPNAVTTTSNPSEPDAQSDTASSSLPRRPPAGSVLSLLGIALDHAQRHSPRADRSAKGRPGREERNGARFNAKQTKPTEAEAYGDHQTPNPDLHRQKETAQCVAESINSMREQQNGMQRTEARLRAKEALQAREAARKQLLDVLEAIQAGREDSTDKKISATEKNATGINYQ	22	-	86796	86827	AGGAACTCATCACCGCGAATCGCCACTCAGCA
Pseudomonas syringae	1	PbbICMP8899	PbbICMP8899|ALQ83_04187	Cluster_2089.1	Type III secretion related protein	PbbICMP8899_Contig_92	+	66075	66467	393	130	ATGAACTCATCACTCACCCTGCAAAAGCTGCTTGATAGGCGTGGTCAGGCGGCCAACGGAAATTCTGCAACGGAGGCCGTACAGTGGCAGGAAGGAATGAACCTGACGCTGCATGTAAGCGGCGATAGCCTCACGATGCTGGCCGAGATCATCGATCTGCGTGCCGACCCTCAGGACGACATCCTCTTGCGCAAGCTGCTTGCCCATGCTTTTCCGGGCCTGCGGCTACGACGCGGCGCGTTGACCATCAACCCGGACGAGAACACGTTGGTGTACTCCTACGAGCATGACTTTCTCGCGCTGGACAAGGCCCGATTCGAAAATCTGCTGGCTAATTTTGCCGAAACAACGCAGGAGTTGCGTAACACCGCGCAGCGCCTGCGTTACCGCTGA	MNSSLTLQKLLDRRGQAANGNSATEAVQWQEGMNLTLHVSGDSLTMLAEIIDLRADPQDDILLRKLLAHAFPGLRLRRGALTINPDENTLVYSYEHDFLALDKARFENLLANFAETTQELRNTAQRLRYR	29	+	66014	66046	GGGAACCACCGCATGGGTTCCGGCCACTCACCG
Pseudomonas syringae	1	PbbICMP8899	PbbICMP8899|ALQ83_05392	Cluster_2093.1	Type III Effector	PbbICMP8899_Contig_88	+	827	1138	312	104	ATCCAGGAGGTCGACTCAATGCATCGTCCTATCAACGCAGGCCATACCACCTCACGTCTCATCCTAGATCAGTCAAAACAAATATCACGTACTCCATCGGAAAGTAGCGCGCAATCAGCACTTTCTCAGCAAACAAGTATGAGCAGCCCAGTTTTGGAGCGGTCGAAAAGTGCGCCAGCTTTATTGACTGCGGCACAGCGCACGATGCTTGCACAAGTGGGAGCCTGTAACGCTCATCTGACCTCAGATGAAAATATGGCCATCAACGAACTGAGATCACACAAGCCCCTTTTACCTAAGGAAGGTCTGAAG	MQEVDSMHRPINAGHTTSRLILDQSKQISRTPSESSAQSALSQQTSMSSPVLERSKSAPALLTAAQRTMLAQVGACNAHLTSDENMAINELRSHKPLLPKEGLK	10	+	785	817	TGAAACCGAAAGGGCGTTGCTTGCCACACAGCA
Pseudomonas syringae	1	PbbICMP8899	PbbICMP8899|ALQ83_100508	Cluster_4422.1	Type III secretion related protein	PbbICMP8899_Contig_278	-	20716	21690	975	324	ATGACCATGGGTGTTTCACCTATTCGTAACTCAAACTCCCTACCGATCGATTTTTCGTCGTTGAGCGCAAAGAGTGGCGGGCATAACGGGCTGGGCAGCGGAGACAATTCGACTATCGACCCGAGTACGTTGTTGTTCGGCAATCAAGGGCAGACGCAGGTCAATTTCGCTCCGCCCAACAGCACGGACTCCTCAACCAGCGGTGTGAACGCTGCGTCAGGCAATACGGCGTCCGGCCTGGTCGAGCAAATCATGAGCCTGCTGAAACAATTGATGCAGATGCTGATGCAAAACAACAATGCTCCCGGTAACCCTCAGACTGATTCGTCAACGCCAGGCGTCGGCAGTGGCAACAGCGTCGGGAGCGGCGGTACTGGAAGCAGTCTCGCAGGCAGTGAC…	MTMGVSPIRNSNSLPIDFSSLSAKSGGHNGLGSGDNSTIDPSTLLFGNQGQTQVNFAPPNSTDSSTSGVNAASGNTASGLVEQIMSLLKQLMQMLMQNNNAPGNPQTDSSTPGVGSGNSVGSGGTGSSLAGSDGGDETSGVGNGGLGDAGSTPTTSAADGVPSDTSLTGSGGLHLPQQLEQYRGDIMDAAKATGVPPSVIAGQIWAESRGQLNAATTNVNGKADAGLMQVNADTFKSLQQQNPGLLGNDVNDSHTNIMAGALYLRDQNKEFGDMGAALRAYNSGPDKVNKADLSDTGGVGGSSYPADVLNFAKIIESGQGNLPA	89	-	21779	21810	GGGAACCGAGTCACTCAGTGAACCACTCAGTT
Pseudomonas syringae	1	PbbICMP8899	PbbICMP8899|ALQ83_200144	Cluster_10978.1	Type III Effector	PbbICMP8899_Contig_157	+	2833	3795	963	320	ATGGGATGTATCTCATCGAAACCTCAGGTAATGTCTCCTTCCCGTCATTACTCTTCACCTGACGCGGAGCCTGCTACCGCTAGAACATCGCATCGTAGGTCAGCTCGTTATGGTGAATTATCGGGCCCTCCAGCACAAACCGGCTTAACGTATTATCAGCAATCGTTAATTGGCGTAGCTCGCTGGCCCGATCCTCAGTATAACCAAGACCATCTTCCTCATCAGATGGAATATGGTCGTTCCTTCTTCGATGCGTCTCGCCACGCAGGTGCTGGCATTGCTTCGGGTCAAGTTCAAGCATTTAGCCAATTGTGGGCCTTGGCACAGCGCTGGAGAAGCGAAGCTGCTGGCGGAGACTACGAAACTTTTGGCGAGGAAAGCGAGCGATACCCAACTTAC…	MGCISSKPQVMSPSRHYSSPDAEPATARTSHRRSARYGELSGPPAQTGLTYYQQSLIGVARWPDPQYNQDHLPHQMEYGRSFFDASRHAGAGIASGQVQAFSQLWALAQRWRSEAAGGDYETFGEESERYPTYNHNPTTPLENQYAYILDRYRNREDGEFSEDVEGVPTNEFPLRDEIDGKPITLSTVVVSADPDANRYDSKYSALRHLEAGEPFYIRHTFSADVPEVLAHVEGLYNQALDASVSDSQALSILGEIHWWVANAMPDHRGSAAKTEFSVRAIAMARGMELPPMRHGIVADLEAMTTSREAFVRHYNNFFDR	340	+	2461	2493	GGGAACTGATTACGACCTTGTGGCGACTCAGTT
Pseudomonas syringae	1	PcdICMP9625	PcdICMP9625|ALP87_00338	Cluster_10488.1	NA	PcdICMP9625_Contig_11	-	2924	3211	288	95	GTGCCTGGGTACCGCACTGCGTTCAGCAAGCCCGAGCAGCAAATCATCTGGCCGACAGTTCAGGCTTGGCTGACGCGAGGCAAGTTGGGTTTCACCGGTCGGGTGCCCAAGGTGAGGATTCACCGGGAAAACGGTGTGTGGTGGTGCTTCGCCAAGGGGCATCCGTGGGCGGGGGCCGGCAATTCGCCCGCTGAAGCCTATGAGTCCTGGGCGCGAGCCGTATCGATTCAGGAACGCAAAGACAAGAACCCCGATAAACCGCTGCAGGTCTGGAGCCGCGCGCTATGA	MPGYRTAFSKPEQQIIWPTVQAWLTRGKLGFTGRVPKVRIHRENGVWWCFAKGHPWAGAGNSPAEAYESWARAVSIQERKDKNPDKPLQVWSRAL	1649	-	1244	1275	TGGAACCGGGAGGGCAATTCGGACACTCAGAT
Pseudomonas syringae	1	PcdICMP9625	PcdICMP9625|ALP87_00951	Cluster_31814.1	NA	PcdICMP9625_Contig_133	-	36346	36618	273	90	ATGACCACTGACGCACGCAACAGCCGTGGGCAGTTTGCTCCAGGTTCGAAGGGCAACCCAGGTGGCCGACCACGGCTGACGGAGGGATCTATCGCTGCTCGGGCATCGAACGCCCTGATCGAAGAGCGCCTGCCTTCGCTGATCGTCCACGCAATGGGTCGGGCTGAGACGAGCGACGAGGTGCTGGCCGGTATCTGCCAGCTGCTCGCCCAGCGCCTGCGCGGCCAGAACCTGATTGCCGAGCGCCAGCTGCTCGACGCCACTTCTCACTGA	MTTDARNSRGQFAPGSKGNPGGRPRLTEGSIAARASNALIEERLPSLIVHAMGRAETSDEVLAGICQLLAQRLRGQNLIAERQLLDATSH	3431	-	32884	32915	AGGAACCGAATCCGTCTCAAAGGCCACATAAA
Pseudomonas syringae	1	PcdICMP9625	PcdICMP9625|ALP87_00974	Cluster_2333.2	Type III Effector	PcdICMP9625_Contig_134	+	17529	18392	864	287	ATGAACATTACGCCGCTCACGTCAGCCGCGGGCAAGGGCTCGTCCGCACAAGGCACAGACAAAATTTCCATTCCCAACTCCACGCGCATGATCAATGCCGCGTCAATCAAGTGGTTGAACAAGGTGCGTAGCGCCATCAGTGACCACATCCGCACCAGCATCGAGAAAGGGAAACTGTTCGAGCTCGCCTCCTTGGGCAGCAACATGTTCGGTGTCCCGGCCCTTTCAGCGCGCCCCTCGACGCTCCAACCTGTGTTGGCGTTTGAGGCCGACCCCAATCACGACCTGAACCTTGTCAGGGTCTATATGCAGGACAGCGCCGGCAAGCTCACTCCCTGGGACCCGACGCCCAACGCGGTCACGACGACGTCGAATCCATCAGAGCCTGATGCGCAGAGC…	MNITPLTSAAGKGSSAQGTDKISIPNSTRMINAASIKWLNKVRSAISDHIRTSIEKGKLFELASLGSNMFGVPALSARPSTLQPVLAFEADPNHDLNLVRVYMQDSAGKLTPWDPTPNAVTTTSNPSEPDAQSDTASSSLPRRPPAGSVLSLLGIALDHAQRHSPRADRSAKGRHGREERNGARFNAKQTKPTEAEAYGDHQTPNPDLHRQKETAQRVAESINSMREQQNGMQRAEGLLRAKEALQAREAARKQLLDVLEAIQAGREDSTDKKISATEKNATGINYQ	22	+	17476	17507	AGGAACTCATTACCGCGAATCGCCACTCAGCA
Pseudomonas syringae	1	PcdICMP9625	PcdICMP9625|ALP87_01607	Cluster_6364.1	Type III Effector	PcdICMP9625_Contig_16	+	32366	33508	1143	380	ATGAACCCCATTCAGTCACGCTTCTCCAGTGTGCAAGAGCTCAGACGATCCAACGTTGATATTCCGGCGCTCAAAGCCAATGGCCAACTGGAGGTCGACGGCAAGAGGTACGAGATTCGTGCAGCCGATGACGGAACAATTTCGGTCCTTCGACCGGAGCAACAGTCCAAGGCGAAAAGTTTTTTCAAGGGCGCTTCTCAGTTGATAGGTGGCAGCAGCCAGCGCGCGCAGATTGCCCAGGCGCTCAACGAGAAAGTCGTATCGGCACGAACTGTATTGCACCAGGGCACTGTGACGGGCGGACGCTTGGACACCCTTGAGCGGGGCGAAAGCAGCTCAGCCACAACAGCCATCAAACCCACTGCCAAACAGGCTGCGCAAAGTACTTTTAACAGCTTT…	MNPIQSRFSSVQELRRSNVDIPALKANGQLEVDGKRYEIRAADDGTISVLRPEQQSKAKSFFKGASQLIGGSSQRAQIAQALNEKVVSARTVLHQGTVTGGRLDTLERGESSSATTAIKPTAKQAAQSTFNSFHEWAKQAEAMRNPSRMDIYKIYKQDAPHSHPMSDEQQEEFLHTLKALNGKNGIEVRTQDHDSVRNKKDRNLDKYIAESPDAKRFFYRIIPKHERREDKNQGRLTIGVQPQYATQLTRAMATLIGKESAITHGKVIGPACHGQMTDSAVLYINGDVAKAEKLGEKLKQMSGIPLDAFVEHTPLSMQSLSKGLSYAESILGDTRGHGMSRAEVISDALRMDGMPFLARLKLSLSANGYDPDNPALRNTK	455	+	31879	31911	TGGAACCGCCTCGAGCAGAGGCTCCACTCATTG
Pseudomonas syringae	1	PcdICMP9625	PcdICMP9625|ALP87_01828	Cluster_828.1	Type III Effector	PcdICMP9625_Contig_171	+	21654	24422	2769	922	ATGATGCCATCTCAGATCACGCGCTCCTCTCATTCATCCTCGCCGGATGCCTCTCAACCGGCTTGCGATGCTGCAAGTAGCCTCGAGCAATCGCCGCAGCAGGTCCGCACCCGGGCGTTTGTCGCCAAAGGCAAACTGTCTGAGGCATTCGGGCGCACGTCTACTGCGCCGGCGCAGGATGCGGTGCACCTGCTGAACAATCTTCAGCGCGAGCTGGCGAAAGAGAATCCGTCTGGTCCCGAGCTTGCCCTGCTGGGCAAAGAGCTCGCCGCTGCCGCGATGACCGAGCAGGGCTCGCATCTGCTGGCCACCGAAGAACACCAGCACGTGTTGAAAGACGTGCTTGATCGTTGCATGCGCCAGTTGGCGGATACGCCTGCGTCTAATGCGTCCCATGTA…	MMPSQITRSSHSSSPDASQPACDAASSLEQSPQQVRTRAFVAKGKLSEAFGRTSTAPAQDAVHLLNNLQRELAKENPSGPELALLGKELAAAAMTEQGSHLLATEEHQHVLKDVLDRCMRQLADTPASNASHVPLSQACEGLKTARLHQSLAMLTGTSHTQTRGVADLLALTQLDPKVLAEKLDGQAPYESFGHFIRTARDSTAALNVSLSDPAGETTGLLRAQADTLEALEKLPAILAALIEHCPDMPTQKDLRSLKDAAGELLTKLRESALLKGSEEIVSEAGESPVHGRESVEPALTRSQALLKAGGKLVRKFDAYGAVAPMDDKKLLALLRTPAPHLSPAQMHAFLNRYAIQLTDEQRTIVSNTALPPASEGDIEAQGGMGFDEKLRLALADGSL…	44	+	21579	21610	GGGAACCGTTCTGGATCGAGCGCCACTCAGCC
Pseudomonas syringae	1	PcdICMP9625	PcdICMP9625|ALP87_01833	Cluster_3432.1	Type III Effector	PcdICMP9625_Contig_171	+	32050	32952	903	300	ATGAAAATATCCGGCTCCACATCGCCTGCAAGCACTCCAACGAATTCCGCGCAGAAGTCCTCTTCAAAAGGTCTGCTGAGTGGTTTGGCCAAGCATTTCAAGGGGATGCTCGTTTCTGGCAACACTTCTGGTCATTCGACGCTCGGGCATTACGCGTCATCCAGCAGCGGCTCTAAAGGCAAGGCACCGGTACGGGACGATTACAGCAACGGGCCGCAAACACGCCTTAACAACACACCTCTGAAACGAGCGCTGGCCCGAGAGCTTGATCGCTTTGGCTACGGTTCATCGGCGACCGAGTCTTTTGACCGCTCATTGCAGCGCAAAGATAAAAACCCGGAGCTTGGTCACCTTGATGATGACGAGTACCTGGCATTGCGCATGTACACCACGCCGTTC…	MKISGSTSPASTPTNSAQKSSSKGLLSGLAKHFKGMLVSGNTSGHSTLGHYASSSSGSKGKAPVRDDYSNGPQTRLNNTPLKRALARELDRFGYGSSATESFDRSLQRKDKNPELGHLDDDEYLALRMYTTPFYMAVSHQLRDGKPSEDMKVVVQAMNNGLKRLAEQPGNVFQETLYRGINKVVDDKFIHKNFKLGQVYRDKTFLSATPDLSTVNATFTRHAVKSSKTSASGSTYQRSPLLEIESRSAVRVRQVSLSSAEDEGIFAPDTPFLVSDKNRTDSGRWHIKLKEIDESNESSLI	516	+	31503	31534	TGGAACCGGACGAGGCTTTTTACCACTCAATG
Pseudomonas syringae	1	PcdICMP9625	PcdICMP9625|ALP87_02327	Cluster_452.1	Type III Effector	PcdICMP9625_Contig_206	+	5431	11313	5883	1960	ATGGTCAAGGTTACCTCTTCCGGATTTACTGCCAACCCTCTCTCTCATCATGCGGACAGTGTTTCCCCCGCGAACAGTCCCCCTCAGTTACCGGAGCCTGTGCCTCTGGTTGATCTAAGCGAGTCGTCCCGCAAGGGCGGCATGCGAAATCGGCCGCATGCCAGTTTGAACAGTCAGGTGCTCGGACTGCAAGCGGTGCCGTCGCAACGTGGAAAGCATGTTCGTGTCAGAAGTCATGCCGATGGCGAGAGTGTCATTAATGCCTGGCTGGCAAAGCGCCCCTCGGTTCAAAGCGAAACCAGTCTTCATAACGATGGCAAGCTGGTGCGTTACACCCCCGTGAATCATGAGCCGCTGGCGCCGCGCAATGAGGCGTTTTTCACCTCTGTGCCGGGGATG…	MVKVTSSGFTANPLSHHADSVSPANSPPQLPEPVPLVDLSESSRKGGMRNRPHASLNSQVLGLQAVPSQRGKHVRVRSHADGESVINAWLAKRPSVQSETSLHNDGKLVRYTPVNHEPLAPRNEAFFTSVPGMLMAVLTVHPEMEHGISGDITADAVAARLAEPPIGLLTGIWQSSHDRAYLERGGVVHTANMEERWAPLTLPGINPREPLRMAGLQADGGVYLHNGSQLWRLTETAAESVTTENLPEGAAVRIGAGGEVHGLHEGALHSNGISRPIELWRPKAGALGREQSPARPVDLLPLPGGTAALILDDKGRIYHADLKGTGAVEAHRLKLPADFAQGKGWAVTAMGLSRDDTVHLMLQDQNGRRMSLQRAPGEALFRPAYLLDRPLLLLYTEGL…	173	+	5227	5258	CGGAACCGATCCGGTTGCCTGGCCACTCAATT
Pseudomonas syringae	1	PcdICMP9625	PcdICMP9625|ALP87_02612	Cluster_2089.1	Type III secretion related protein	PcdICMP9625_Contig_236	+	6561	6953	393	130	ATGAACTCATCACTCACCCTGCAAAAGCTGCTTGATAGGCGTGGTCAGGCGGCCAACGGAAATTCTGCAACGGAGGCCGTACAGTGGCAGGAAGGAATGAACCTGACGCTGCATGTAAGCGGCGATAGCCTCACGATGCTGGCCGAGATCATCGATCTGCGTGCCGACCCTCAGGACGACATCCTCTTGCGCAAGCTGCTTGCCCATGCTTTTCCGGGCCTGCGGCTACGACGCGGCGCGTTGACCATCAACCCGGACGAGAACACGTTGGTGTACTCCTACGAGCATGACTTTCTCGCGCTGGACAAGGCCCGATTCGAAAATCTGCTGGCTAATTTTGCCGAAACAACGCAGGAGTTGCGTAACACCGCGCAGCGCCTGCGTTACCGCTGA	MNSSLTLQKLLDRRGQAANGNSATEAVQWQEGMNLTLHVSGDSLTMLAEIIDLRADPQDDILLRKLLAHAFPGLRLRRGALTINPDENTLVYSYEHDFLALDKARFENLLANFAETTQELRNTAQRLRYR	29	+	6500	6532	GGGAACCACCGCATGGGTTCCGGCCACTCACCG
Pseudomonas syringae	1	PcdICMP9625	PcdICMP9625|ALP87_04229	Cluster_4852.1	Type III secretion related protein	PcdICMP9625_Contig_86	+	4749	5855	1107	368	ATGAAAATCGTCGCTCCGCCTATCATGCGAATACTTCCGGTCGCGCCGACCCGCGTCGTGACGCCTGCTGCGCAGCCACTTCCCAATGCTGATCTGCACAATTCAGGGACTTCGCCACAACAGGTTTCGCGCTTCGCGGCCGCGCTCATCCAGCACAGACGCATCCTCATTCAGCGCGACCTGATCGCCAGCAACAATGCCTTGCAGTCGCGAGCGGTGAAGCTCGGTGAGCTTTATCAACTGCTGATGACCGATCAGGACACCGGGCTGGATAACGCGGCCAGGGTATTGCGCAAAAAGCTCATGCAGGATGACTCGTCCTCAGATCTGAAACAGGTTCTGGATTACACCGACGGTGATGCCGCCAAGGCTCATGTGGTGTTGCAAGCCGCCAGGAAG…	MKIVAPPIMRILPVAPTRVVTPAAQPLPNADLHNSGTSPQQVSRFAAALIQHRRILIQRDLIASNNALQSRAVKLGELYQLLMTDQDTGLDNAARVLRKKLMQDDSSSDLKQVLDYTDGDAAKAHVVLQAARKQAEADGEMGEHVVLTQQLKQLRRKYGPRARAGINSAKAFARPNIDNKRRVALRNLYSVAVSGQPNITGLIEALLGEQQEAGQFNIDLRDMRTAIADDLSAMTPSASHEQLRTLMHGLNTARHVTTLLKGCEHLLGRMRNKNPDLTVDPPAFLKHLLTLTANGMNVNQTLQLTQHIGGKQLKHQLAFLNGLRPMLLQLPILLWRDMKSRQTALSNLLILMAELTTQEQKQLYGGLV	27	+	4690	4722	GGGAACTGATCCGGGACCGTGACCCACTCAGCG
Pseudomonas syringae	1	PcdICMP9625	PcdICMP9625|ALP87_04233	Cluster_3403.1	Type III secretion related protein	PcdICMP9625_Contig_86	+	10764	11339	576	191	GTGACGATGACCGCACCGATCAAAACCCCGGCCAAAGCGCCACCAGCCCCCCAGCGCTCTGCGCCTGTCGAGCGGCCGGCCACAGCTCTGAGCGAAAAACCATTCGGTGAAAAACGCCTTGCATCCGGTGGCCTGGGCCGTGGCGATGTACAGACCAGCCGTTCGGTACTGAGCAAGTCGCTGCAAGACACCCCGATGAGTGCCGACGGCATGTTCTTTTCGCAACTGCTGGTGCCGCCCGTAAGTGCCGAACCTGGTCAGCAAGGCTTTGGCGGGGGCGGTATAGCCTTTCCGGTACGCGCAGAACAAGTGCCGACCCAACTGATCGACGAGCTGGCGCAGCGCCTGCCGGATCAGCCTGACGGCCCCCTCAGTTTCACCCTGCTGATGCCCAACCTG…	MTMTAPIKTPAKAPPAPQRSAPVERPATALSEKPFGEKRLASGGLGRGDVQTSRSVLSKSLQDTPMSADGMFFSQLLVPPVSAEPGQQGFGGGGIAFPVRAEQVPTQLIDELAQRLPDQPDGPLSFTLLMPNLGSVRVNANKTENRWSVQLGFARSDVLKRLSAHTGACRDSLSQALGQDVELDMHEDLSA	6042	+	4690	4722	GGGAACTGATCCGGGACCGTGACCCACTCAGCG
Pseudomonas syringae	1	PcdICMP9625	PcdICMP9625|ALP87_04242	Cluster_49085.1	Type III secretion related protein	PcdICMP9625_Contig_86	-	18873	19115	243	80	TTGCTGGAGCACCAGGACATGATCAGTTTCAACAGCTTGCAACGCCATCTCGACAACTCGGTGAGCCGCGCTCACACCAACATGGACCAGGCAGCGATGGAAGCCTCCGAGAGTGGCACCGTCGAAGACCTGCAGGCATTCAACGATGCCCAGCAGCAGGTCGATGTCGCCGGTATTGCCGTCAATGAATGCCTGCGTGCCAAGCACGGTATCAATAAAGCAGTCATCGATGGAATTCAGTGA	MLEHQDMISFNSLQRHLDNSVSRAHTNMDQAAMEASESGTVEDLQAFNDAQQQVDVAGIAVNECLRAKHGINKAVIDGIQ	12	-	19127	19159	TGGAACCGCTCGGCGGGTTTGCTCCACTCAAGG
Pseudomonas syringae	1	PcdICMP9625	PcdICMP9625|ALP87_04244	Cluster_2413.3	Type III secretion related protein	PcdICMP9625_Contig_86	-	19809	20339	531	176	ATGATGAGCCTTTCTGCCGAGGATCACTGGGTCCACTGGTGGTGCAACCCCTGGCAGTGGGCTCATTCGCAGTGGCATGACCGATTCGCCAGCGCTCGGGGGTTGTCGGTCAGTGACTGCGATGCGCTCATGGCCAGCCGTCATGGCGTGTTTCTGCAGAGTCTGGGCATCGACCCGGCTCAGCCGCCAGCGCCCGCGGAACCGGTGCTGCGCTGGTTGGCGCTGACGCCCTCGCAGCGTGAGCAGGCGCTAAGCCTGGCGCAGTGCATCTGCTTCTCCCGTAACGAAAGCGACGGCCCTGACGGTCAATGGTGCTGGGGGTTGACCAAAGCGCTGCGCCCCGGTGTCTGGCTGGAGTTTGAACACGAGGACGCGCGCCTTCTGCTGGGCGCCTGGCTT…	MMSLSAEDHWVHWWCNPWQWAHSQWHDRFASARGLSVSDCDALMASRHGVFLQSLGIDPAQPPAPAEPVLRWLALTPSQREQALSLAQCICFSRNESDGPDGQWCWGLTKALRPGVWLEFEHEDARLLLGAWLGPQYWSRLRLEWPPNEVPDTPGKAPENKLQALWQAIMWRVTAA	2762	-	23101	23133	TGGAACCGATTCGCAGGCTGCTGCCACCTAGTG
Pseudomonas syringae	1	PcdICMP9625	PcdICMP9625|ALP87_04246	Cluster_28714.2	Type III secretion related protein	PcdICMP9625_Contig_86	-	21151	21525	375	124	GTGACCATTTCCCAACTCAGCAATTTGAAAAGTGTATCGCCGGAGCTTGGGCAGAATGCTCATCAGGGGCTCGGCTCCGAACCCGTTCAGGCGGATGTCGACCTATTCAATGCGGCGATGCGCCCTGACAGCGGGCCCGCAGCGTCGCACCTGTCCGACCGGATAGCCAGTGCGCTGTCCGAGCGGCTGGGCAGTACCGAGAAGCTTTCACAGCAAGCATTACGCCAGATGAAGAAAGTGTCGAACACCGAAGATCCTGGAGACATCGTGCAGATGAGTCGGGCGTTGTCGCAGTGCTCGTTGCAAATGGCGTTGACGACCAAGGTCGTGAGCAAGAGCGCTCAGGCGCTCGACAAGTTGACCAACCTGCAGTAG	MTISQLSNLKSVSPELGQNAHQGLGSEPVQADVDLFNAAMRPDSGPAASHLSDRIASALSERLGSTEKLSQQALRQMKKVSNTEDPGDIVQMSRALSQCSLQMALTTKVVSKSAQALDKLTNLQ	1576	-	23101	23133	TGGAACCGATTCGCAGGCTGCTGCCACCTAGTG
Pseudomonas syringae	1	PcdICMP9625	PcdICMP9625|ALP87_04247	Cluster_4702.2	Type III secretion related protein	PcdICMP9625_Contig_86	-	21553	22659	1107	368	ATGCAAGCACTTAACAGCATCAGTTCGTTGCAAACCTCTGCATCATTGTTCCCCGTGTCGCTCAACAGCGATGTGAGCGCCAACACCAGCACTTCCAGCAAAGAGCTCAAGGCTGTGATCGATCAGCTGGTTCAGGCGCTGACCCAAAGTGGGCAGCTCGATGAAACCTCACCGCTCGGCAAAATGCTCGCCAAGGCCATGGCTGCGGATGGCAAGTCGGCTAACAGCATCGATGACATCACTGCATCGCTCGACAAGCTGATCCACGAAAAGCTCGGCGACAATTTCGGTGCCTCTGCCGGCATCGGCGCGGGTGGCGGTGGCATTGGCGGGGCGGGTTCTGGTTCGGGTGTCGGTGGCGGTCTGAGCAGCGACGCGGGTGCCGGGCAATCCGATCTG…	MQALNSISSLQTSASLFPVSLNSDVSANTSTSSKELKAVIDQLVQALTQSGQLDETSPLGKMLAKAMAADGKSANSIDDITASLDKLIHEKLGDNFGASAGIGAGGGGIGGAGSGSGVGGGLSSDAGAGQSDLMSQVLNGLGKAVLDDLLTPSGEGGTTFSSDDMPTLEKVAQFMDDNKAQFPTRDGGSWMNELKEDNGLDAQETAQFRSALDVIGQQLGQQQGDASGVTSGGGLGSPVSDTSLGNPAIDANTGPAANGNASVDVGQLIGQLIDRGLQSVSSGGGLGTPVDNSTQPAGGTPAANPTGNVSNQDLGQLLSGLLQRGLEATLQDAGNTGADLQSSAAQVAAQLINALLQGTNNQTNQAVA	442	-	23101	23133	TGGAACCGATTCGCAGGCTGCTGCCACCTAGTG
Pseudomonas syringae	1	PcdICMP9625	PcdICMP9625|ALP87_04248	Cluster_2333.1	Type III secretion related protein	PcdICMP9625_Contig_86	-	22715	23056	342	113	ATGGTCGCATTTTCAAGCCTTACCTCCAAACTCACCAACTTTGGTAACAGCGCCGTAGGCGGTGTCGGTGGCGCATTGCAGGGTGTCAACACGGTTGCTTCCAACGCCGGTCTTCAGAAAAACATTCTCGCGGGTACCGGCGACAGCCTGTCGGTTGATGCACAAGCCAAGGCCAGCAAAGAATCGGACGCCAACGGCGCCAAGCTGATTGCGATGCAGGCTCAGGAAACCATGAAGAAGCAAACCATGGACGTGCTCAACGCAATCCAGGCTGGCAAGGAAGACTCTTCCAACAAGAAGATCAGTGCCACAGCGACGAACGCTAAAGGTATCAGTTACTAA	MVAFSSLTSKLTNFGNSAVGGVGGALQGVNTVASNAGLQKNILAGTGDSLSVDAQAKASKESDANGAKLIAMQAQETMKKQTMDVLNAIQAGKEDSSNKKISATATNAKGISY	45	-	23101	23133	TGGAACCGATTCGCAGGCTGCTGCCACCTAGTG
Pseudomonas syringae	1	PcdICMP9625	PcdICMP9625|ALP87_05085	Cluster_43697.1	Type III Effector	PcdICMP9625_Contig_171	+	35554	36087	534	177	GTGAAAAAGTCTGGCGCTGGAACTCAAGCCTATGCGTTGTTCGCCTCTGCGACGGGAAGCTCGTCGAAGGGCGTTCTAAGTACCATTGCCAGGCACCTGACGGGATGTTTTGCACCCAACAAGACTGCGCTTCATTCAGCAACAGCCGTTTCGTATGAGCTATTGCCGGGCAATTATTCTGTCGCCGCCAGTGTGCATGGCTTGTCGGTTGATCACCGCCAGCCGGCGCTGACACGACTGAGTAACGTGCTGTTCAATCAGGCACTGGCGCTGGACCTGGAGCGTTTTGACGAGGGCGCGCCAGCCGACGAAATGTTCAGGCCTTCACTGAAACGCGAAGGTGCCCATCCCCGATTGGCCGACTCACTGGGTGGCGAGCAACTGGCTGTGCAAACCATG…	MKKSGAGTQAYALFASATGSSSKGVLSTIARHLTGCFAPNKTALHSATAVSYELLPGNYSVAASVHGLSVDHRQPALTRLSNVLFNQALALDLERFDEGAPADEMFRPSLKREGAHPRLADSLGGEQLAVQTMEKGLKRLAEDPAQSFARCHSFFYPISSDTTSPQASLHSVASSSG	517	+	35006	35037	CGGAACCGCGGCGCGTCCTGCGCCACTCAGTG
Pseudomonas syringae	1	PcdICMP9625	PcdICMP9625|ALP87_05497	Cluster_406.1	Type III Effector	PcdICMP9625_Contig_52	+	14989	19098	4110	1369	CTGAGCCGATGGAGCCCGCTCATGACCTTAAGAATCAATACTCGTTCTGCTACCCCGGTTGTACCTCTGGAAACAGGCTCTACATCGCAGCCGACACCACCGCCGGTCACGGCAAGAGCGACTGAGCCTCCCCCCGTCGCCAATCCTGCGGCGCCTAAATCAGCGCCAGGTGTTCAGCAAGCACACGGGCTGAAGACGCGCATCGCTGGCAAGCTTTCCGAACGTCAGACCAATTTCAGTCTCGGGATTCCCGGCACTGGTCGTACTCTCAACCGGCCCTTGCGCAGCGGGATTCCGGAGGAAGGTGAGCAGGTATCGAACGAGGAGAGTCATGATCCGTTGCTCAAGGAAGCGCATGAACTGCAGCGCATGGTGGAGTCGGCGCTGACCCATCTGAAC…	MSRWSPLMTLRINTRSATPVVPLETGSTSQPTPPPVTARATEPPPVANPAAPKSAPGVQQAHGLKTRIAGKLSERQTNFSLGIPGTGRTLNRPLRSGIPEEGEQVSNEESHDPLLKEAHELQRMVESALTHLNAAPTSLWERPAPSTVRRITTKVFPWLKPAPLREVASNGSNAKTKIKINSQQSPETIAAAVKELSTRLDHQSKVLATATHALVAAREHLESLEQATPPSSTERLDHARARVQQADSTTRLASQQLRELIQGTEVLQLGALSEGQDQVEQKAEFSQQWLSELRIRMQAVDVRFADRHAAIEIELQLKVAQTRELISLDHDMTAAEHTAAQANTQLSALRAQRQETPEGSDEADRLDTAIRQTLATRSQAMQTHQQLAKRLVQVDADVA…	261	+	14697	14728	CGGAACCGAATCCACATTTCGACCACCCATCC
Pseudomonas syringae	1	PcdICMP9625	PcdICMP9625|ALP87_05600	Cluster_23630.1	Type III Effector	PcdICMP9625_Contig_7	-	1956	2450	495	164	ATGGGAAATATGTGTGTCGGCGGATCCAGGATGGCCCATCAGGTGAACTCCCCAGACCGAGTTAGTAACAACTCGGGTGACGAAGGTAACGTAACGTCCAGTCAACTGCTGAGCGTCAGACATCAACTTACGGAGTCTGCTGGTCTACCAAGAGATCAGCATGAATTTGTTAGTAGCCAAGCACCTCAAAGCCTGAGAAATCGCTACAACAATCTTTACTCACATACGCAAAGAACGCTGGATATGGCGGACATGCAGCATAGGTTCATGACGGGAGCGTCAAGAATCAATCCGGGAATGCTGCCACATGAGAATGTGGACGATATGCGTAGCGCTATAACTGATTGGAGTGACATGCGCGAAGCTCTGCAGCACGCAATGGGTATCCATGCCGACATC…	MGNMCVGGSRMAHQVNSPDRVSNNSGDEGNVTSSQLLSVRHQLTESAGLPRDQHEFVSSQAPQSLRNRYNNLYSHTQRTLDMADMQHRFMTGASRINPGMLPHENVDDMRSAITDWSDMREALQHAMGIHADIPPSPERFFATMNPSGSIRMSTLSPSPYRNWQ	36	-	2486	2518	TGGAACCGATCCGCTCCCTATGACCACTCAAGT
Pseudomonas syringae	1	PcdICMP9625	PcdICMP9625|ALP87_100553	Cluster_4422.1	Type III secretion related protein	PcdICMP9625_Contig_61	-	20766	21740	975	324	ATGACCATGGGTGTTTCACCTATTCGTAACTCAAACTCCCTACCGATCGATTTTTCGTCGTTGAGCGCAAAGAGTAGCGGGCATAACGGGCTGGGCAGCGGAGACAATTCGACTATCGACCCGAGTACGTTGTTGTTGGGCAATCAAGGGCAGACGCAGGTCAATTTCGCTCCGCCCAACAGCACGGACTCCTCAACCAGCGGTGTGAACGCTGCGTCAGGCAATACGGCGTCCGGCCTGGTCGAGCAAATCATGAGCCTGCTGAAACAATTGATGCAGATGCTGATGCAAAACAACAATGCTTCCGGTAACCCTCAGACTGATTCGTCAACGCCAGGCGTCGGCAGTGGCAACAGCGTCGGGAGCGGCGGTACTGGAAGCAGTCTCGCAGGCAGTGAC…	MTMGVSPIRNSNSLPIDFSSLSAKSSGHNGLGSGDNSTIDPSTLLLGNQGQTQVNFAPPNSTDSSTSGVNAASGNTASGLVEQIMSLLKQLMQMLMQNNNASGNPQTDSSTPGVGSGNSVGSGGTGSSLAGSDGGDETSGVGNGGLGDAGSTPTTSAADGVPSDTSLTGSGGLHLPQQLEQYRGDIMDAAKATGVPPSVIAGQIWAESRGQLNAATTNVNGKADAGLMQVNADTFKSLQQQNPGLLGNDVNDSHTNIMAGALYLRDQNKEFGDMGAALRAYNSGPDKVNKADLSDTGGVGGSSYPADVLNFAKIIESGQGNLPA	89	-	21829	21860	GGGAACCGAGCTACTCAGTGAACCACTCAGTT
Pseudomonas syringae	1	PcdICMP9625	PcdICMP9625|ALP87_101384	Cluster_23272.1	NA	PcdICMP9625_Contig_240	+	1812	2093	282	93	ATGGACACCCTCAACCCTTTTGCATGGCAAGCACTTAATTGCCATTCACAACCTATCAAGGTGCCCAGGATGAAAAAAACCAAACTGCTCAACCGCGCTATCTGCATTGCCTTTTTTCCGCTGGCAGCATTGGCTGGCAACGCCTTCGCGGACTCAGGCTCGGCCTCAGCAGGAACTGGTAGTTCGCAGAGTGCAGCGGATCAGCGTGCAGCCATGGAGGCTGCTGCAGAGGCCGCCAAGCGATGCGGATTCGTTTTCGGACAAGGCCATGTCTGCGATTGA	MDTLNPFAWQALNCHSQPIKVPRMKKTKLLNRAICIAFFPLAALAGNAFADSGSASAGTGSSQSAADQRAAMEAAAEAAKRCGFVFGQGHVCD	580	+	2673	2703	TGGAACCGATTCCGATGAGCAGCCATCCATA
Pseudomonas syringae	1	PcdICMP9625	PcdICMP9625|ALP87_200034	Cluster_3390.2	Type III secretion related protein	PcdICMP9625_Contig_26	+	104444	104938	495	164	ATGACCAACAATGACCAGTACCACACCCTTATCAACGAAATCTGCGCACTCAGCCTGATTTCCACACCTGAACGTTTCTATGAATCTGCCAATTTCAAAATCAGCGAAGTGGACTTCACCCTGCAGTTTCAGGACCGCGACGAAGGCCGTGCCGTTCTGATCTACGGTGACATGGGCGCGTTGCCCGCGCGCGGCCGTGAGAGCGCGTTGCTGGCGTTGATGGACATCAACTTTCATATGTGCGCGGGCGCCCACAGCCCCGCATTTTCCTTTAATGCGCAGACCGGTCGAGTGCTGCTGATGGGCTCTGTGGCCCTTGAACGAGCCTCTGCCGAAGGCGTGCTGTTGTTGATGAAGTCGTTTTCCGACCTGGCCAAAGAGTGGCGCGAGCATGGGTTC…	MTNNDQYHTLINEICALSLISTPERFYESANFKISEVDFTLQFQDRDEGRAVLIYGDMGALPARGRESALLALMDINFHMCAGAHSPAFSFNAQTGRVLLMGSVALERASAEGVLLLMKSFSDLAKEWREHGFMGQATTAGSSTDQPVAPAAKRESLSAPGRFQ	57	+	104355	104387	AGGAACTGAAATGCCTCTGCCTCCGACTCAGTG
Pseudomonas syringae	1	PcdICMP9625	PcdICMP9625|ALP87_200039	Cluster2_1312.1	Type III Effector	PcdICMP9625_Contig_35	-	5961	8078	2118	705	ATGAATCCTCTACGATCTATTCAACACAACATTGCAACTCCCCCAATCAGTGGCGGTCAGCCATTAGACGCCGTGGGCCCTCAGGCCCAGCAATCCCATCCTAAAAGGATTTCACCTTCTCAATTGAGCCAAAGCGCTCACCAGGCTCTAGAACGCCTTTCAGCTAATGCCGAACACCAACGCCTTGCATCACTTGTACGCAACGCTCTGCAGGATGGCACATTTCAATTTCAATCCAGTAACCACACGCAAGTAACCTATAAAGCGTCAATCTGTCTGCCAGCTGACACCGATACCGTGAGAACCGACCACTTGATTAATAACGAGCTGACGGTTCAGGCCCAATTAAATGATCAATCGGAGTACGACATCGTCAGCGCACATTTGCATGGCTCTTCG…	MNPLRSIQHNIATPPISGGQPLDAVGPQAQQSHPKRISPSQLSQSAHQALERLSANAEHQRLASLVRNALQDGTFQFQSSNHTQVTYKASICLPADTDTVRTDHLINNELTVQAQLNDQSEYDIVSAHLHGSSKAISFDVPSPPPAHGSASSVLSERTHLGMSRVLSQDAVDSSSLETPLLSSPDHSRPPSQPKPVHIGSVRRDSGNLVSDNPVVQDLLSFAQADQAFPPQAASIAGVQLEMRPRRDIEKALEEFKGAFTVEKAQLMSVTNSSERADEDINADIHIPLLLKAIERGAAAFGPNASIGQNSAKAFLASCAPKITSNDDVLSEFINQKLKGDDDLQVRLGAQELLHVATKKEFQLGGLAGSIGISSILGSAWELGASELLKNAIFGKNFSP…	37	-	8115	8146	TGGAACCCAAGAGCCCTTGCGACCACACATTG
Pseudomonas syringae	1	PcdICMP9625	PcdICMP9625|ALP87_200104	Cluster_3994.1	Type III Effector	PcdICMP9625_Contig_26	+	98948	100000	1053	350	ATGTATATCCAGCAATCTGGCGCCCAATCAGGGGTTACCGCTAAGACGCAGCACGATAAGGCCTCGTCATTGTCCGGACTCGCCCCCGGTTCGTCGGATGCGTTCGCCCGTTTTCATCCCGAAACGGCGGGCGCCTTTGTCCCATTGGAGGGGCATGAAGAGGTCTTTTTCGATGCGCGCTCTTCATTTTCGTCGGTCGATGCCGCTGATCTTCCCAGTCCCGAGCAGGTACAACCCCAGCTTCATTCGTTGCGTACCCTGCTACCGGATCTGATGGTCTCTATCGCCTCATTACGTGACGGCACCACGCAATACATCAAGACCAGAATCAAGGCTATGGCGGACAGCAGCGTAGGCGCGACTGCTAACATCGAAGCCAAAAGAAAGATTGCCCAAGAG…	MYIQQSGAQSGVTAKTQHDKASSLSGLAPGSSDAFARFHPETAGAFVPLEGHEEVFFDARSSFSSVDAADLPSPEQVQPQLHSLRTLLPDLMVSIASLRDGTTQYIKTRIKAMADSSVGATANIEAKRKIAQEHGCQLVHPFHQSKFLFEKTIDDRAFAADYGRAGGDGHACLGLSVNWCQSRAKGQPDEAFFHKLEDYQGDALLPRVMGFQHIEQQAYSNKMQNAAPMLLDTLPKLGMTLGKGLGRAQHAHYAVALENLDRDLKTVLQPGKDQMLLFLSDSHAMALHQDSQGCLHFFDPLFGVVQADSFSNMSHFLADVFKRDVGTHWRGTEQRLQLSEMVPRADFHLR	525	+	98393	98423	GGGAACCGCATCACGTCTTGAACCACAGAAG
Pseudomonas syringae	1	PcdICMP9625	PcdICMP9625|ALP87_200194	Cluster_4528.1	Type III secretion related protein	PcdICMP9625_Contig_26	-	102897	104141	1245	414	ATGAGCATCGGCATCACACCCCGGCCGCAACAGACCACCACGCCACTCGATTTTTCGGCGCTAAGCGGCAAGAGTCCTCAACCAAACACGTTCGGCGAGCAGAACACTCAGCAAGCGATCGACCCGAGTGCACTGTTGTTCGGCAGCGACACACAGAAAGACGTCAACTTCGGCACGCCCGACAGCACCGTCCAGAATCCGCAGGACGCCAGCAAGCCCGACGACAGCCAGTCCAACATCGCTAAATTGATCAGTGCATTGATCATGTCGTTGCTGCAGATGCTCACCAACTCCAATAAAAAGCAGGATGCCAATCAGGAGCAGCCTGATAGCCAGGCTCCTTTCCAGAACAACGGCGGGCTCGGTACACCGTCGGCCGATAGCGGGGGCGGCGGTACA…	MSIGITPRPQQTTTPLDFSALSGKSPQPNTFGEQNTQQAIDPSALLFGSDTQKDVNFGTPDSTVQNPQDASKPDDSQSNIAKLISALIMSLLQMLTNSNKKQDANQEQPDSQAPFQNNGGLGTPSADSGGGGTPDATGGGGGGDTPSATGGGGSGGGGTPTATGGGGGGTPTATGGGEGGVTPQITPQLANPNRTSGTGSVSDTAGSTEQAGKINVVKDTIKVGAGEVFDGHGATFTADKSMGNGDQGENQKPMFELAEGATLKNVNLGENEVDGIHVKAKNAQEVTIDNVHAQNVGEDLITVKGEGGAAVTNLNIKNSSAKGADDKVVQLNANTHLKVDNFKADDFGTMVRTNGGKQFDDMSIELNGIEANHGKFALVKSDSDDLKLATGNIAMTDVK…	122	-	104263	104293	GGGAACCGGTCGCTGCGCTTTGCCACTCACT
Pseudomonas syringae	1	PcdICMP9829	PcdICMP9829|ALP36_00298	Cluster_10488.1	NA	PcdICMP9829_Contig_11	+	2612	2899	288	95	GTGCCTGGGTACCGCACTGCGTTCAGCAAGCCCGAGCAGCAAATCATCTGGCCGACAGTTCAGGCTTGGCTGACGCGAGGCAAGTTGGGTTTCACCGGTCGGGTGCCCAAGGTGAGGATTCACCGGGAAAACGGTGTGTGGTGGTGCTTCGCCAAGGGGCATCCGTGGGCGGGGGCCGGCAATTCGCCCGCTGAAGCCTATGAGTCCTGGGCGCGAGCCGTATCGATTCAGGAACGCAAAGACAAGAACCCCGATAAACCGCTGCAGGTCTGGAGCCGCGCGCTATGA	MPGYRTAFSKPEQQIIWPTVQAWLTRGKLGFTGRVPKVRIHRENGVWWCFAKGHPWAGAGNSPAEAYESWARAVSIQERKDKNPDKPLQVWSRAL	1649	+	4548	4579	TGGAACCGGGAGGGCAATTCGGACACTCAGAT
Pseudomonas syringae	1	PcdICMP9829	PcdICMP9829|ALP36_00500	Cluster_2333.1	Type III secretion related protein	PcdICMP9829_Contig_117	+	1876	2217	342	113	ATGGTCGCATTTTCAAGCCTTACCTCCAAACTCACCAACTTTGGTAACAGCGCCGTAGGCGGTGTCGGTGGCGCATTGCAGGGTGTCAACACGGTTGCTTCCAACGCCGGTCTTCAGAAAAACATTCTCGCGGGTACCGGCGACAGCCTGTCGGTTGATGCACAAGCCAAGGCCAGCAAAGAATCGGACGCCAACGGCGCCAAGCTGATTGCGATGCAGGCTCAGGAAACCATGAAGAAGCAAACCATGGACGTGCTCAACGCAATCCAGGCTGGCAAGGAAGACTCTTCCAACAAGAAGATCAGTGCCACAGCGACGAACGCTAAAGGTATCAGTTACTAA	MVAFSSLTSKLTNFGNSAVGGVGGALQGVNTVASNAGLQKNILAGTGDSLSVDAQAKASKESDANGAKLIAMQAQETMKKQTMDVLNAIQAGKEDSSNKKISATATNAKGISY	45	+	1799	1831	TGGAACCGATTCGCAGGCTGCTGCCACCTAGTG
Pseudomonas syringae	1	PcdICMP9829	PcdICMP9829|ALP36_00501	Cluster_4702.2	Type III secretion related protein	PcdICMP9829_Contig_117	+	2273	3379	1107	368	ATGCAAGCACTTAACAGCATCAGTTCGTTGCAAACCTCTGCATCATTGTTCCCCGTGTCGCTCAACAGCGATGTGAGCGCCAACACCAGCACTTCCAGCAAAGAGCTCAAGGCTGTGATCGATCAGCTGGTTCAGGCGCTGACCCAAAGTGGGCAGCTCGATGAAACCTCACCGCTCGGCAAAATGCTCGCCAAGGCCATGGCTGCGGATGGCAAGTCGGCTAACAGCATCGATGACATCACTGCATCGCTCGACAAGCTGATCCACGAAAAGCTCGGCGACAATTTCGGTGCCTCTGCCGGCATCGGCGCGGGTGGCGGTGGCATTGGCGGGGCGGGTTCTGGTTCGGGTGTCGGTGGCGGTCTGAGCAGCGACGCGGGTGCCGGGCAATCCGATCTG…	MQALNSISSLQTSASLFPVSLNSDVSANTSTSSKELKAVIDQLVQALTQSGQLDETSPLGKMLAKAMAADGKSANSIDDITASLDKLIHEKLGDNFGASAGIGAGGGGIGGAGSGSGVGGGLSSDAGAGQSDLMSQVLNGLGKAVLDDLLTPSGEGGTTFSSDDMPTLEKVAQFMDDNKAQFPTRDGGSWMNELKEDNGLDAQETAQFRSALDVIGQQLGQQQGDASGVTSGGGLGSPVSDTSLGNPAIDANTGPAANGNASVDVGQLIGQLIDRGLQSVSSGGGLGTPVDNSTQPAGGTPAANPTGNVSNQDLGQLLSGLLQRGLEATLQDAGNTGADLQSSAAQVAAQLINALLQGTNNQTNQAVA	442	+	1799	1831	TGGAACCGATTCGCAGGCTGCTGCCACCTAGTG
Pseudomonas syringae	1	PcdICMP9829	PcdICMP9829|ALP36_00502	Cluster_28714.2	Type III secretion related protein	PcdICMP9829_Contig_117	+	3407	3781	375	124	GTGACCATTTCCCAACTCAGCAATTTGAAAAGTGTATCGCCGGAGCTTGGGCAGAATGCTCATCAGGGGCTCGGCTCCGAACCCGTTCAGGCGGATGTCGACCTATTCAATGCGGCGATGCGCCCTGACAGCGGGCCCGCAGCGTCGCACCTGTCCGACCGGATAGCCAGTGCGCTGTCCGAGCGGCTGGGCAGTACCGAGAAGCTTTCACAGCAAGCATTACGCCAGATGAAGAAAGTGTCGAACACCGAAGATCCTGGAGACATCGTGCAGATGAGTCGGGCGTTGTCGCAGTGCTCGTTGCAAATGGCGTTGACGACCAAGGTCGTGAGCAAGAGCGCTCAGGCGCTCGACAAGTTGACCAACCTGCAGTAG	MTISQLSNLKSVSPELGQNAHQGLGSEPVQADVDLFNAAMRPDSGPAASHLSDRIASALSERLGSTEKLSQQALRQMKKVSNTEDPGDIVQMSRALSQCSLQMALTTKVVSKSAQALDKLTNLQ	1576	+	1799	1831	TGGAACCGATTCGCAGGCTGCTGCCACCTAGTG
Pseudomonas syringae	1	PcdICMP9829	PcdICMP9829|ALP36_00504	Cluster_2413.3	Type III secretion related protein	PcdICMP9829_Contig_117	+	4593	5123	531	176	ATGATGAGCCTTTCTGCCGAGGATCACTGGGTCCACTGGTGGTGCAACCCCTGGCAGTGGGCTCATTCGCAGTGGCATGACCGATTCGCCAGCGCTCGGGGGTTGTCGGTCAGTGACTGCGATGCGCTCATGGCCAGCCGTCATGGCGTGTTTCTGCAGAGTCTGGGCATCGACCCGGCTCAGCCGCCAGCGCCCGCGGAACCGGTGCTGCGCTGGTTGGCGCTGACGCCCTCGCAGCGTGAGCAGGCGCTAAGCCTGGCGCAGTGCATCTGCTTCTCCCGTAACGAAAGCGACGGCCCTGACGGTCAATGGTGCTGGGGGTTGACCAAAGCGCTGCGCCCCGGTGTCTGGCTGGAGTTTGAACACGAGGACGCGCGCCTTCTGCTGGGCGCCTGGCTT…	MMSLSAEDHWVHWWCNPWQWAHSQWHDRFASARGLSVSDCDALMASRHGVFLQSLGIDPAQPPAPAEPVLRWLALTPSQREQALSLAQCICFSRNESDGPDGQWCWGLTKALRPGVWLEFEHEDARLLLGAWLGPQYWSRLRLEWPPNEVPDTPGKAPENKLQALWQAIMWRVTAA	2762	+	1799	1831	TGGAACCGATTCGCAGGCTGCTGCCACCTAGTG
Pseudomonas syringae	1	PcdICMP9829	PcdICMP9829|ALP36_00506	Cluster_49085.1	Type III secretion related protein	PcdICMP9829_Contig_117	+	5817	6059	243	80	TTGCTGGAGCACCAGGACATGATCAGTTTCAACAGCTTGCAACGCCATCTCGACAACTCGGTGAGCCGCGCTCACACCAACATGGACCAGGCAGCGATGGAAGCCTCCGAGAGTGGCACCGTCGAAGACCTGCAGGCATTCAACGATGCCCAGCAGCAGGTCGATGTCGCCGGTATTGCCGTCAATGAATGCCTGCGTGCCAAGCACGGTATCAATAAAGCAGTCATCGATGGAATTCAGTGA	MLEHQDMISFNSLQRHLDNSVSRAHTNMDQAAMEASESGTVEDLQAFNDAQQQVDVAGIAVNECLRAKHGINKAVIDGIQ	12	+	5773	5805	TGGAACCGCTCGGCGGGTTTGCTCCACTCAAGG
Pseudomonas syringae	1	PcdICMP9829	PcdICMP9829|ALP36_00514	Cluster_3403.1	Type III secretion related protein	PcdICMP9829_Contig_117	-	13593	14168	576	191	GTGACGATGACCGCACCGATCAAAACCCCGGCCAAAGCGCCACCAGCCCCCCAGCGCTCTGCGCCTGTCGAGCGGCCGGCCACAGCTCTGAGCGAAAAACCATTCGGTGAAAAACGCCTTGCATCCGGTGGCCTGGGCCGTGGCGATGTACAGACCAGCCGTTCGGTACTGAGCAAGTCGCTGCAAGACACCCCGATGAGTGCCGACGGCATGTTCTTTTCGCAACTGCTGGTGCCGCCCGTAAGTGCCGAACCTGGTCAGCAAGGCTTTGGCGGGGGCGGTATAGCCTTTCCGGTACGCGCAGAACAAGTGCCGACCCAACTGATCGACGAGCTGGCGCAGCGCCTGCCGGATCAGCCTGACGGCCCCCTCAGTTTCACCCTGCTGATGCCCAACCTG…	MTMTAPIKTPAKAPPAPQRSAPVERPATALSEKPFGEKRLASGGLGRGDVQTSRSVLSKSLQDTPMSADGMFFSQLLVPPVSAEPGQQGFGGGGIAFPVRAEQVPTQLIDELAQRLPDQPDGPLSFTLLMPNLGSVRVNANKTENRWSVQLGFARSDVLKRLSAHTGACRDSLSQALGQDVELDMHEDLSA	6042	-	20210	20242	GGGAACTGATCCGGGACCGTGACCCACTCAGCG
Pseudomonas syringae	1	PcdICMP9829	PcdICMP9829|ALP36_00518	Cluster_4852.1	Type III secretion related protein	PcdICMP9829_Contig_117	-	19077	20183	1107	368	ATGAAAATCGTCGCTCCGCCTATCATGCGAATACTTCCGGTCGCGCCGACCCGCGTCGTGACGCCTGCTGCGCAGCCACTTCCCAATGCTGATCTGCACAATTCAGGGACTTCGCCACAACAGGTTTCGCGCTTCGCGGCCGCGCTCATCCAGCACAGACGCATCCTCATTCAGCGCGACCTGATCGCCAGCAACAATGCCTTGCAGTCGCGAGCGGTGAAGCTCGGTGAGCTTTATCAACTGCTGATGACCGATCAGGACACCGGGCTGGATAACGCGGCCAGGGTATTGCGCAAAAAGCTCATGCAGGATGACTCGTCCTCAGATCTGAAACAGGTTCTGGATTACACCGACGGTGATGCCGCCAAGGCTCATGTGGTGTTGCAAGCCGCCAGGAAG…	MKIVAPPIMRILPVAPTRVVTPAAQPLPNADLHNSGTSPQQVSRFAAALIQHRRILIQRDLIASNNALQSRAVKLGELYQLLMTDQDTGLDNAARVLRKKLMQDDSSSDLKQVLDYTDGDAAKAHVVLQAARKQAEADGEMGEHVVLTQQLKQLRRKYGPRARAGINSAKAFARPNIDNKRRVALRNLYSVAVSGQPNITGLIEALLGEQQEAGQFNIDLRDMRTAIADDLSAMTPSASHEQLRTLMHGLNTARHVTTLLKGCEHLLGRMRNKNPDLTVDPPAFLKHLLTLTANGMNVNQTLQLTQHIGGKQLKHQLAFLNGLRPMLLQLPILLWRDMKSRQTALSNLLILMAELTTQEQKQLYGGLV	27	-	20210	20242	GGGAACTGATCCGGGACCGTGACCCACTCAGCG
Pseudomonas syringae	1	PcdICMP9829	PcdICMP9829|ALP36_00549	Cluster_6364.1	Type III Effector	PcdICMP9829_Contig_120	-	9447	10589	1143	380	ATGAACCCCATTCAGTCACGCTTCTCCAGTGTGCAAGAGCTCAGACGATCCAACGTTGATATTCCGGCGCTCAAAGCCAATGGCCAACTGGAGGTCGACGGCAAGAGGTACGAGATTCGTGCAGCCGATGACGGAACAATTTCGGTCCTTCGACCGGAGCAACAGTCCAAGGCGAAAAGTTTTTTCAAGGGCGCTTCTCAGTTGATAGGTGGCAGCAGCCAGCGCGCGCAGATTGCCCAGGCGCTCAACGAGAAAGTCGTATCGGCACGAACTGTATTGCACCAGGGCACTGTGACGGGCGGACGCTTGGACACCCTTGAGCGGGGCGAAAGCAGCTCAGCCACAACAGCCATCAAACCCACTGCCAAACAGGCTGCGCAAAGTACTTTTAACAGCTTT…	MNPIQSRFSSVQELRRSNVDIPALKANGQLEVDGKRYEIRAADDGTISVLRPEQQSKAKSFFKGASQLIGGSSQRAQIAQALNEKVVSARTVLHQGTVTGGRLDTLERGESSSATTAIKPTAKQAAQSTFNSFHEWAKQAEAMRNPSRMDIYKIYKQDAPHSHPMSDEQQEEFLHTLKALNGKNGIEVRTQDHDSVRNKKDRNLDKYIAESPDAKRFFYRIIPKHERREDKNQGRLTIGVQPQYATQLTRAMATLIGKESAITHGKVIGPACHGQMTDSAVLYINGDVAKAEKLGEKLKQMSGIPLDAFVEHTPLSMQSLSKGLSYAESILGDTRGHGMSRAEVISDALRMDGMPFLARLKLSLSANGYDPDNPALRNTK	455	-	11044	11076	TGGAACCGCCTCGAGCAGAGGCTCCACTCATTG
Pseudomonas syringae	1	PcdICMP9829	PcdICMP9829|ALP36_01061	Cluster_406.1	Type III Effector	PcdICMP9829_Contig_149	+	43298	47386	4089	1362	ATGACCTTAAGAATCAATACTCGTTCTGCTACCCCGGTTGTACCTCTGGAAACAGGCTCTACATCGCAGCCGACACCACCGCCGGTCACGGCAAGAGCGACTGAGCCTCCCCCCGTCGCCAATCCTGCGGCGCCTAAATCAGCGCCAGGTGTTCAGCAAGCACACGGGCTGAAGACGCGCATCGCTGGCAAGCTTTCCGAACGTCAGACCAATTTCAGTCTCGGGATTCCCGGCACTGGTCGTACTCTCAACCGGCCCTTGCGCAGCGGGATTCCGGAGGAAGGTGAGCAGGTATCGAACGAGGAGAGTCATGATCCGTTGCTCAAGGAAGCGCATGAACTGCAGCGCATGGTGGAGTCGGCGCTGACCCATCTGAACGCGGCACCGACGTCTCTCTGG…	MTLRINTRSATPVVPLETGSTSQPTPPPVTARATEPPPVANPAAPKSAPGVQQAHGLKTRIAGKLSERQTNFSLGIPGTGRTLNRPLRSGIPEEGEQVSNEESHDPLLKEAHELQRMVESALTHLNAAPTSLWERPAPSTVRRITTKVFPWLKPAPLREVASNGSNAKTKIKINSQQSPETIAAAVKELSTRLDHQSKVLATATHALVAAREHLESLEQATPPSSTERLDHARARVQQADSTTRLASQQLRELIQGTEVLQLGALSEGQDQVEQKAEFSQQWLSELRIRMQAVDVRFADRHAAIEIELQLKVAQTRELISLDHDMTAAEHTAAQANTQLSALRAQRQETPEGSDEADRLDTAIRQTLATRSQAMQTHQQLAKRLVQVDADVARLNDELG…	282	+	42985	43016	CGGAACCGAATCCACATTTCGACCACCCATCC
Pseudomonas syringae	1	PcdICMP9829	PcdICMP9829|ALP36_01558	Cluster_5248.1	NA	PcdICMP9829_Contig_187	-	3110	4441	1332	443	ATGAACCCCATCAGACCTTCCTCTCATTCAGTTCAGCCGTTGCTGACTAATCACGGTGAAGTAGCGCCGAACTTGCCACCCATACACGCGGCCGTCTTGAGTGGCGATAGCGCTCGCGTAGCGCAATTGCGTAATGAAGGTGCGCGTATCAGCGAACTGGATCATGAGAAACGATCGCCCCTGGATGTGCTCGACGCAATGCGAGATATCGATGAGCGCAGTAGGTCTGGCATGCGCATGGCCCTCCTGCAGTCCCTGAACCCTACCGCACCAATAGGCTACATGAAGCCCGAAGCCTTGCATGGAACACCTTGGGGGTTGGAGATTTTGCATTCTGGATCACTCAAGGCCGGGGTCAACGACCCCAAAGGTGGCCGTGAGTCCTTGGAGCGCATGGTA…	MNPIRPSSHSVQPLLTNHGEVAPNLPPIHAAVLSGDSARVAQLRNEGARISELDHEKRSPLDVLDAMRDIDERSRSGMRMALLQSLNPTAPIGYMKPEALHGTPWGLEILHSGSLKAGVNDPKGGRESLERMVFFSDRTPESEKDNTTRLNLRVKPRLYANGKGVNVSNASSRAQQHRLSQVITHAADNGKKLQTMPGSVTIEVSDLKQAAREGGAWLQRFLHDKYILKGAGQSFTKASLGQNSSSLKLPASVTLKEGDKTKVLDDKELHEFFHQAARTLQSELEGGKAPFLSLLNSGVVVPMVFGFEKVKNLSAHEISTSIPGKNNRFMYKANEHRLAGGSDCGKIKELEIRSLGDLAALYLGCELKNIKLPEDLLIRLKTSKKEKAEYLSASAIDKF…	1324	-	1754	1786	TGGAACCGGATGCTCTGCAAGGGCCACACATGC
Pseudomonas syringae	1	PcdICMP9829	PcdICMP9829|ALP36_01973	Cluster_4756.1	polygalacturonase activity	PcdICMP9829_Contig_215	+	12111	13712	1602	533	TTGATGTCAGGCGCCGCACACTTCTCCAACTCCGTTTTCCGAAAAACCTCCTGGGCAATGACCTCTCTGACCGCTTCGCTGATGATCGCCGCGCCCGTACAGGCCGCTGGCGAGGCTGCGGTGGTAACGCCCTGGGGCACGATAAACGAGCCCGCCAGCCCGCAGGTCTGCAAGCAACTACCGGCCACGTTGGCCCCCAAGGATGGCTCGCTGGACAGCGTCGACAGTGCGGCGCTCGACTCCAGACCTGACCAGGACAGAATTCAGAGCGCAATCAATGGCTGCGCAGCCGGGCAAGCCGTCCAACTGGTCAAAGGCACTGGCGACAACTCGGCATTCCTCAGCGGAGCCCTGCAGCTTAAATCCGGCGTGACGCTGTGGATCGACGACGGCGTTACG…	MMSGAAHFSNSVFRKTSWAMTSLTASLMIAAPVQAAGEAAVVTPWGTINEPASPQVCKQLPATLAPKDGSLDSVDSAALDSRPDQDRIQSAINGCAAGQAVQLVKGTGDNSAFLSGALQLKSGVTLWIDDGVTLFASRNPKDYDNGKGTCGVTTVANQDACSALISAKNTRASGVIGKGVIDGRGGSLLTSGANANQRSWWDLVYQKTLSNAYQQKPRLIQVSGGADFVIQGVTLQNAPDFNIVTDGVTGVTVWGIKILTPSRVYTVEGYHCPTGSTPDQKTPGTCFTPETVKNTDGFDPGQSNKVLLAYSYISTGDDNVAIKSSRTSGSRDLMFAHNHFYYGHGLSIGSETNGGVHNVSVVDLAADGADSQDGIGLRIKSGAKNGGIVDGVSYENVCM…	963	+	14675	14706	GGGAACCGATTCGCTTCTAAAACCACTCAATC
Pseudomonas syringae	1	PcdICMP9829	PcdICMP9829|ALP36_03217	Cluster_2333.2	Type III Effector	PcdICMP9829_Contig_36	-	27803	28666	864	287	ATGAACATTACGCCGCTCACGTCAGCCGCGGGCAAGGGCTCGTCCGCACAAGGCACAGACAAAATTTCCATTCCCAACTCCACGCGCATGATCAATGCCGCGTCAATCAAGTGGTTGAACAAGGTGCGTAGCGCCATCAGTGACCACATCCGCACCAGCATCGAGAAAGGGAAACTGTTCGAGCTCGCCTCCTTGGGCAGCAACATGTTCGGTGTCCCGGCCCTTTCAGCGCGCCCCTCGACGCTCCAACCTGTGTTGGCGTTTGAGGCCGACCCCAATCACGACCTGAACCTTGTCAGGGTCTATATGCAGGACAGCGCCGGCAAGCTCACTCCCTGGGACCCGACGCCCAACGCGGTCACGACGACGTCGAATCCATCAGAGCCTGATGCGCAGAGC…	MNITPLTSAAGKGSSAQGTDKISIPNSTRMINAASIKWLNKVRSAISDHIRTSIEKGKLFELASLGSNMFGVPALSARPSTLQPVLAFEADPNHDLNLVRVYMQDSAGKLTPWDPTPNAVTTTSNPSEPDAQSDTASSSLPRRPPAGSVLSLLGIALDHAQRHSPRADRSAKGRHGREERNGARFNAKQTKPTEAEAYGDHQTPNPDLHRQKETAQRVAESINSMREQQNGMQRAEGLLRAKEALQAREAARKQLLDVLEAIQAGREDSTDKKISATEKNATGINYQ	22	-	28688	28719	AGGAACTCATTACCGCGAATCGCCACTCAGCA
Pseudomonas syringae	1	PcdICMP9829	PcdICMP9829|ALP36_03851	Cluster_3390.2	Type III secretion related protein	PcdICMP9829_Contig_63	-	10849	11343	495	164	ATGACCAACAATGACCAGTACCACACCCTTATCAACGAAATCTGCGCACTCAGCCTGATTTCCACACCTGAACGTTTCTATGAATCTGCCAATTTCAAAATCAGCGAAGTGGACTTCACCCTGCAGTTTCAGGACCGCGACGAAGGCCGTGCCGTTCTGATCTACGGTGACATGGGCGCGTTGCCCGCGCGCGGCCGTGAGAGCGCGTTGCTGGCGTTGATGGACATCAACTTTCATATGTGCGCGGGCGCCCACAGCCCCGCATTTTCCTTTAATGCGCAGACCGGTCGAGTGCTGCTGATGGGCTCTGTGGCCCTTGAACGAGCCTCTGCCGAAGGCGTGCTGTTGTTGATGAAGTCGTTTTCCGACCTGGCCAAAGAGTGGCGCGAGCATGGGTTC…	MTNNDQYHTLINEICALSLISTPERFYESANFKISEVDFTLQFQDRDEGRAVLIYGDMGALPARGRESALLALMDINFHMCAGAHSPAFSFNAQTGRVLLMGSVALERASAEGVLLLMKSFSDLAKEWREHGFMGQATTAGSSTDQPVAPAAKRESLSAPGRFQ	57	-	11400	11432	AGGAACTGAAATGCCTCTGCCTCCGACTCAGTG
Pseudomonas syringae	1	PcdICMP9829	PcdICMP9829|ALP36_03852	Cluster_4528.1	Type III secretion related protein	PcdICMP9829_Contig_63	+	11646	12890	1245	414	ATGAGCATCGGCATCACACCCCGGCCGCAACAGACCACCACGCCACTCGATTTTTCGGCGCTAAGCGGCAAGAGTCCTCAACCAAACACGTTCGGCGAGCAGAACACTCAGCAAGCGATCGACCCGAGTGCACTGTTGTTCGGCAGCGACACACAGAAAGACGTCAACTTCGGCACGCCCGACAGCACCGTCCAGAATCCGCAGGACGCCAGCAAGCCCGACGACAGCCAGTCCAACATCGCTAAATTGATCAGTGCATTGATCATGTCGTTGCTGCAGATGCTCACCAACTCCAATAAAAAGCAGGATGCCAATCAGGAGCAGCCTGATAGCCAGGCTCCTTTCCAGAACAACGGCGGGCTCGGTACACCGTCGGCCGATAGCGGGGGCGGCGGTACA…	MSIGITPRPQQTTTPLDFSALSGKSPQPNTFGEQNTQQAIDPSALLFGSDTQKDVNFGTPDSTVQNPQDASKPDDSQSNIAKLISALIMSLLQMLTNSNKKQDANQEQPDSQAPFQNNGGLGTPSADSGGGGTPDATGGGGGGDTPSATGGGGSGGGGTPTATGGGGGGTPTATGGGEGGVTPQITPQLANPNRTSGTGSVSDTAGSTEQAGKINVVKDTIKVGAGEVFDGHGATFTADKSMGNGDQGENQKPMFELAEGATLKNVNLGENEVDGIHVKAKNAQEVTIDNVHAQNVGEDLITVKGEGGAAVTNLNIKNSSAKGADDKVVQLNANTHLKVDNFKADDFGTMVRTNGGKQFDDMSIELNGIEANHGKFALVKSDSDDLKLATGNIAMTDVK…	122	+	11494	11524	GGGAACCGGTCGCTGCGCTTTGCCACTCACT
Pseudomonas syringae	1	PcdICMP9829	PcdICMP9829|ALP36_04000	Cluster_2089.1	Type III secretion related protein	PcdICMP9829_Contig_68	+	55295	55687	393	130	ATGAACTCATCACTCACCCTGCAAAAGCTGCTTGATAGGCGTGGTCAGGCGGCCAACGGAAATTCTGCAACGGAGGCCGTACAGTGGCAGGAAGGAATGAACCTGACGCTGCATGTAAGCGGCGATAGCCTCACGATGCTGGCCGAGATCATCGATCTGCGTGCCGACCCTCAGGACGACATCCTCTTGCGCAAGCTGCTTGCCCATGCTTTTCCGGGCCTGCGGCTACGACGCGGCGCGTTGACCATCAACCCGGACGAGAACACGTTGGTGTACTCCTACGAGCATGACTTTCTCGCGCTGGACAAGGCCCGATTCGAAAATCTGCTGGCTAATTTTGCCGAAACAACGCAGGAGTTGCGTAACACCGCGCAGCGCCTGCGTTACCGCTGA	MNSSLTLQKLLDRRGQAANGNSATEAVQWQEGMNLTLHVSGDSLTMLAEIIDLRADPQDDILLRKLLAHAFPGLRLRRGALTINPDENTLVYSYEHDFLALDKARFENLLANFAETTQELRNTAQRLRYR	29	+	55234	55266	GGGAACCACCGCATGGGTTCCGGCCACTCACCG
Pseudomonas syringae	1	PcdICMP9829	PcdICMP9829|ALP36_04831	Cluster_43697.1	Type III Effector	PcdICMP9829_Contig_138	-	22660	23193	534	177	GTGAAAAAGTCTGGCGCTGGAACTCAAGCCTATGCGTTGTTCGCCTCTGCGACGGGAAGCTCGTCGAAGGGCGTTCTAAGTACCATTGCCAGGCACCTGACGGGATGTTTTGCACCCAACAAGACTGCGCTTCATTCAGCAACAGCCGTTTCGTATGAGCTATTGCCGGGCAATTATTCTGTCGCCGCCAGTGTGCATGGCTTGTCGGTTGATCACCGCCAGCCGGCGCTGACACGACTGAGTAACGTGCTGTTCAATCAGGCACTGGCGCTGGACCTGGAGCGTTTTGACGAGGGCGCGCCAGCCGACGAAATGTTCAGGCCTTCACTGAAACGCGAAGGTGCCCATCCCCGATTGGCCGACTCACTGGGTGGCGAGCAACTGGCTGTGCAAACCATG…	MKKSGAGTQAYALFASATGSSSKGVLSTIARHLTGCFAPNKTALHSATAVSYELLPGNYSVAASVHGLSVDHRQPALTRLSNVLFNQALALDLERFDEGAPADEMFRPSLKREGAHPRLADSLGGEQLAVQTMEKGLKRLAEDPAQSFARCHSFFYPISSDTTSPQASLHSVASSSG	517	-	23710	23741	CGGAACCGCGGCGCGTCCTGCGCCACTCAGTG
Pseudomonas syringae	1	PcdICMP9829	PcdICMP9829|ALP36_04853	Cluster_452.1	Type III Effector	PcdICMP9829_Contig_141	-	14428	20301	5874	1957	ATGGTCAAGGTTACCTCTTCCGGATTTACTGCCAACCCTCTCTCTCATCATGCGGACAGTGTTTCCCCCGCGAACAGTCCCCCTCAGTTACCGGAGCCTGTGCCTCTGGTTGATCTAAGCGAGTCGTCCCGCAAGGGCGGCATGCGAAATCGGCCGCATGCCAGTTTGAACAGTCAGGTGCTCGGACTGCAAGCGGTGCCGTCGCAACGTGGAAAGCATGTTCGTGTCAGAAGTCATGCCGATGGCGAGAGTGTCATTAATGCCTGGCTGGCAAAGCGCCCCTCGGTTCAAAGCGAAACCAGTCTTCATAACGATGGCAAGCTGGTGCGTTACACCCCCGTGAATCATGAGCCGCTGGCGCCGCGCAATGAGGCGTTTTTCACCTCTGTGCCGGGGATG…	MVKVTSSGFTANPLSHHADSVSPANSPPQLPEPVPLVDLSESSRKGGMRNRPHASLNSQVLGLQAVPSQRGKHVRVRSHADGESVINAWLAKRPSVQSETSLHNDGKLVRYTPVNHEPLAPRNEAFFTSVPGMLMAVLTVHPEMEHGISGDITADAVAARLAEPPIGLLTGIWQSSHDRAYLERGGVVHTANMEERWAPLTLPGINPREPLRMAGLQADGGVYLHNGSQLWRLTETAAESVTTENLPEGAAVRIGAGGEVHGLHEGALHSNGISRPIELWRPKAGALGREQSPARPVDLLPLPGGTAALILDDKGRIYHADLKGTGAVEAHRLKLPADFAQGKGWAVTAMGLSRDDTVHLMLQDQNGRRMSLQRAPGEALFRPAYLLDRPLLLLYTEGL…	173	-	20474	20505	CGGAACCGATCCGGTTGCCTGGCCACTCAATT
Pseudomonas syringae	1	PcdICMP9829	PcdICMP9829|ALP36_100591	Cluster_4422.1	Type III secretion related protein	PcdICMP9829_Contig_69	-	20864	21838	975	324	ATGACCATGGGTGTTTCACCTATTCGTAACTCAAACTCCCTACCGATCGATTTTTCGTCGTTGAGCGCAAAGAGTAGCGGGCATAACGGGCTGGGCAGCGGAGACAATTCGACTATCGACCCGAGTACGTTGTTGTTGGGCAATCAAGGGCAGACGCAGGTCAATTTCGCTCCGCCCAACAGCACGGACTCCTCAACCAGCGGTGTGAACGCTGCGTCAGGCAATACGGCGTCCGGCCTGGTCGAGCAAATCATGAGCCTGCTGAAACAATTGATGCAGATGCTGATGCAAAACAACAATGCTTCCGGTAACCCTCAGACTGATTCGTCAACGCCAGGCGTCGGCAGTGGCAACAGCGTCGGGAGCGGCGGTACTGGAAGCAGTCTCGCAGGCAGTGAC…	MTMGVSPIRNSNSLPIDFSSLSAKSSGHNGLGSGDNSTIDPSTLLLGNQGQTQVNFAPPNSTDSSTSGVNAASGNTASGLVEQIMSLLKQLMQMLMQNNNASGNPQTDSSTPGVGSGNSVGSGGTGSSLAGSDGGDETSGVGNGGLGDAGSTPTTSAADGVPSDTSLTGSGGLHLPQQLEQYRGDIMDAAKATGVPPSVIAGQIWAESRGQLNAATTNVNGKADAGLMQVNADTFKSLQQQNPGLLGNDVNDSHTNIMAGALYLRDQNKEFGDMGAALRAYNSGPDKVNKADLSDTGGVGGSSYPADVLNFAKIIESGQGNLPA	89	-	21927	21958	GGGAACCGAGCTACTCAGTGAACCACTCAGTT
Pseudomonas syringae	1	PcdICMP9829	PcdICMP9829|ALP36_100616	Cluster_3994.1	Type III Effector	PcdICMP9829_Contig_63	-	15787	16839	1053	350	ATGTATATCCAGCAATCTGGCGCCCAATCAGGGGTTACCGCTAAGACGCAGCACGATAAGGCCTCGTCATTGTCCGGACTCGCCCCCGGTTCGTCGGATGCGTTCGCCCGTTTTCATCCCGAAACGGCGGGCGCCTTTGTCCCATTGGAGGGGCATGAAGAGGTCTTTTTCGATGCGCGCTCTTCATTTTCGTCGGTCGATGCCGCTGATCTTCCCAGTCCCGAGCAGGTACAACCCCAGCTTCATTCGTTGCGTACCCTGCTACCGGATCTGATGGTCTCTATCGCCTCATTACGTGACGGCACCACGCAATACATCAAGACCAGAATCAAGGCTATGGCGGACAGCAGCGTAGGCGCGACTGCTAACATCGAAGCCAAAAGAAAGATTGCCCAAGAG…	MYIQQSGAQSGVTAKTQHDKASSLSGLAPGSSDAFARFHPETAGAFVPLEGHEEVFFDARSSFSSVDAADLPSPEQVQPQLHSLRTLLPDLMVSIASLRDGTTQYIKTRIKAMADSSVGATANIEAKRKIAQEHGCQLVHPFHQSKFLFEKTIDDRAFAADYGRAGGDGHACLGLSVNWCQSRAKGQPDEAFFHKLEDYQGDALLPRVMGFQHIEQQAYSNKMQNAAPMLLDTLPKLGMTLGKGLGRAQHAHYAVALENLDRDLKTVLQPGKDQMLLFLSDSHAMALHQDSQGCLHFFDPLFGVVQADSFSNMSHFLADVFKRDVGTHWRGTEQRLQLSEMVPRADFHLR	525	-	17364	17394	GGGAACCGCATCACGTCTTGAACCACAGAAG
Pseudomonas syringae	1	PcdICMP9829	PcdICMP9829|ALP36_100836	Cluster_3432.1	Type III Effector	PcdICMP9829_Contig_138	-	25795	26697	903	300	ATGAAAATATCCGGCTCCACATCGCCTGCAAGCACTCCAACGAATTCCGCGCAGAAGTCCTCTTCAAAAGGTCTGCTGAGTGGTTTGGCCAAGCATTTCAAGGGGATGCTCGTTTCTGGCAACACTTCTGGTCATTCGACGCTCGGGCATTACGCGTCATCCAGCAGCGGCTCTAAAGGCAAGGCACCGGTACGGGACGATTACAGCAACGGGCCGCAAACACGCCTTAACAACACACCTCTGAAACGAGCGCTGGCCCGAGAGCTTGATCGCTTTGGCTACGGTTCATCGGCGACCGAGTCTTTTGACCGCTCATTGCAGCGCAAAGATAAAAACCCGGAGCTTGGTCACCTTGATGATGACGAGTACCTGGCATTGCGCATGTACACCACGCCGTTC…	MKISGSTSPASTPTNSAQKSSSKGLLSGLAKHFKGMLVSGNTSGHSTLGHYASSSSGSKGKAPVRDDYSNGPQTRLNNTPLKRALARELDRFGYGSSATESFDRSLQRKDKNPELGHLDDDEYLALRMYTTPFYMAVSHQLRDGKPSEDMKVVVQAMNNGLKRLAEQPGNVFQETLYRGINKVVDDKFIHKNFKLGQVYRDKTFLSATPDLSTVNATFTRHAVKSSKTSASGSTYQRSPLLEIESRSAVRVRQVSLSSAEDEGIFAPDTPFLVSDKNRTDSGRWHIKLKEIDESNESSLI	516	-	27213	27244	TGGAACCGGACGAGGCTTTTTACCACTCAATG
Pseudomonas syringae	1	PdpICMP13052	PdpICMP13052|ALQ08_00601	Cluster_406.1	Type III Effector	PdpICMP13052_Contig_134	+	26536	30630	4095	1364	ATGACCTTAAGAATCAATACTCGTTCTGCTACCCCGGTTGTACCTCTGGAAACAGGCTCTTCATCGCAGCCGACACCACCGCCGGTCACGGCAAGACCGACTGAGCCTCCCCCCGTCGCCAATCCTGCTGCGCCTAAATCAGCGCCAGGTGTTCAGCAAGCACACGGGCTGAAGACGCGCATCACTGGCAAGCTTTCCGAACGTCAGACCAATTTCAGTCTTGGAATTCCCGGCACCGGTCGTACTCTCAACCGGCCCCTGCGCAGCGGAATCCCGGAGGAAGGTGAACACCTATCGAGCGAGGAGAGTCATGATCCGTTGCTCAAGGAAGCGCATGAACTGCAGCGCATGGTCGAGTCGGCGCTGACCCATCTGAAAGCGGCGCCGACGTCTCTCTGG…	MTLRINTRSATPVVPLETGSSSQPTPPPVTARPTEPPPVANPAAPKSAPGVQQAHGLKTRITGKLSERQTNFSLGIPGTGRTLNRPLRSGIPEEGEHLSSEESHDPLLKEAHELQRMVESALTHLKAAPTSLWERPAPSTVRRITTKVFPWLKPAPLREVASNGSNGSNAKTKADNSKQSPETIAAAVKELGTRLDHQSKVLATATHALVAAREHLESLEQATPPTSTERLDHARARVQQADSTTRLASQQLRELIQGTEVLQLGALSEGQDQVEQKAEFSQQWLGELRTRMQAVDVRFADRHAAIEIELQLKVAETRELISLDHDMTAAEHTAAQANTQLSALRAQRQETPEGSDEADRLDTAIGQTLATRSQAMQTHQQLAKRLVRVDADVARLNDE…	283	+	26222	26253	CGGAACCGAATCGACATTTCGACCACCCATCC
Pseudomonas syringae	1	PdpICMP13052	PdpICMP13052|ALQ08_00652	Cluster_2089.1	Type III secretion related protein	PdpICMP13052_Contig_137	+	26560	26952	393	130	ATGAACTCATCACTCACCCTGCAAAAGCTGCTTGATAGGCGTGGTCAGGCGGCCAACGGAAATTCTGCAACGGAGGCCGTACAGTGGCAGGAAGGAATGAACCTGACGCTGCATGTAAGCGGCGATAGCCTCACGATGCTGGCCGAAATCATCGATCTGCGTGCCGACCCTCAGGACGACATCCTCTTGCGCAAGCTGCTTGCCCATGCTTTTCCCGGCCTGCGGCTACGACGCGGCGCGTTGACCATCAACCCGGACGAGAACACGTTGGTGTACTCCTACGAGCATGACTTTCTCACGCTGGACAAGGCCCGATTCGAAAATCTGCTGGCTAATTTTGCCGAAACAACGCAGGAGTTGCGTAACACCGCGCAGCGCCTGCGTTACCGCTGA	MNSSLTLQKLLDRRGQAANGNSATEAVQWQEGMNLTLHVSGDSLTMLAEIIDLRADPQDDILLRKLLAHAFPGLRLRRGALTINPDENTLVYSYEHDFLTLDKARFENLLANFAETTQELRNTAQRLRYR	29	+	26499	26531	GGGAACCACCGCGTGGGTTCCAGCCACTCACCG
Pseudomonas syringae	1	PdpICMP13052	PdpICMP13052|ALQ08_01062	Cluster_3390.2	Type III secretion related protein	PdpICMP13052_Contig_162	-	3699	4193	495	164	ATGACCAACAATGACCAGTACCACACCCTTATCAACGAAATCTGCGCACTCAGCCTGATTTCCACACCTGAACGTTTCTATGAATCTGCCAATTTCAAAATCAGCGAAGTGGACTTCACCCTTCAGTTTCAAGACCGCGACGAAGGCCGTGCCGTTCTGATCTACGGTGACATGGGCGCGTTGCCCGCGCGCGGCCGTGAGAGCGCGTTGCTGGCGTTGATGGACATCAACTTTCACATGTTCGCGGGCGCCCATAGCCCGGCATTTTCCTTTAATGCGCAGACCGGTCGTGTGCTGCTGATGGGCTCTGTGGCCCTTGAACGAGCCTCTGCCGAAGGCGTGCTGTTGTTGATGAAGTCGTTTTCCGACCTGGCCAAAGAGTGGCGCGAGCATGGGTTC…	MTNNDQYHTLINEICALSLISTPERFYESANFKISEVDFTLQFQDRDEGRAVLIYGDMGALPARGRESALLALMDINFHMFAGAHSPAFSFNAQTGRVLLMGSVALERASAEGVLLLMKSFSDLAKEWREHGFMGQATTAGASTDQPVAPAAKRESLSAPGRFQ	57	-	4250	4282	AGGAACTGAAATGCCTATGCCTGCGACTCAGTG
Pseudomonas syringae	1	PdpICMP13052	PdpICMP13052|ALQ08_02394	Cluster_49085.1	Type III secretion related protein	PdpICMP13052_Contig_281	-	1902	2126	225	74	ATGATCAGTTTCAACAGCTTGCAACGCCATCTCGACAACTCGGTGAGCCGCGCTCACACCAACATGGACCAGGCCGCGATGGAAGCCTCCGAGAGTGGCAACGTCGAAGACCTGCAGGCATTCAACGATGCCCAGCAGCAGGTCGATGTCGCCGGTATTGCTGTCAACGAATGCCTGCGTGCCAAGCACGGTATCAATAAAGAAGTCATCGATGGAATTCAGTGA	MISFNSLQRHLDNSVSRAHTNMDQAAMEASESGNVEDLQAFNDAQQQVDVAGIAVNECLRAKHGINKEVIDGIQ	30	-	2156	2188	TGGAACCGCTCGGCGGGTTTGCTCCACTCAAGG
Pseudomonas syringae	1	PdpICMP13052	PdpICMP13052|ALQ08_03005	Cluster_6364.1	Type III Effector	PdpICMP13052_Contig_62	-	7835	8977	1143	380	ATGAACCCCATTCAGTCACGCTTCTCCAGTGTGCAAGAGCTCAGACGATCCAACGTTGATATTCCGGCGCTCAAAGCCAATGGCCAACTGGAGGTCGACGGCAAGAGGTACGAGATACGTGCAGCCGATGACGGAACAATCTCGGTCCTTCGACCGGAACAACAATCCAAAGCGAAAGGTTTTTTCAAAGGCGCTTCCCAGTTGATAGGTGGCAGCAGCCAGCGCGCGCAGATTGCCCAGGCGCTCAACGAGAAGGTCGCATCGGCACGCACTGTCTTGCACCAGAGCGCTATGACGGGCGGACGCTTTGACACCCTTGAGCGGGGCGAAAGCAGCTCAGCCACAACAGCCATCAAACCCACTGCCAACCAGGCTGCGCAAAGTACTTTTAACAGCTTT…	MNPIQSRFSSVQELRRSNVDIPALKANGQLEVDGKRYEIRAADDGTISVLRPEQQSKAKGFFKGASQLIGGSSQRAQIAQALNEKVASARTVLHQSAMTGGRFDTLERGESSSATTAIKPTANQAAQSTFNSFHEWAKQAEAMQNPSRMDIYKIYKQDAPHSHPMSDEQQEEFLHTLKELNGKKGIEVRTQDHDNVRNKKDRNLDKYIAESPNAKKFFYRITPKHERREDKHQGRLTIGVQPQYAAQLTRAMATLIEKESAITQGKVIGPAYHGQMTDSAVLYINGDVAKAEKLGEKLKQMSGIPLDAFVEHTPLSMQSLSKGLSYAESILGDTRGHGMSRAEVISDALRMDGMPFLARLKLSLSANGYDPDNPALRNTK	455	-	9432	9464	TGGAACCGCCTCGAGCAGAGGCTCCACTCATTG
Pseudomonas syringae	1	PdpICMP13052	PdpICMP13052|ALQ08_03560	Cluster_4702.2	Type III secretion related protein	PdpICMP13052_Contig_85	+	9605	10705	1101	366	ATGCAAGCACTTAACAGCATCAGTTCGTTGCAAACCTCTGCATCATTGTTCCCCGTGTCGCTCAACAGCGATGTGAGCGCCAACACCAGCACTTCCAGCAAAGAGCTCAAGGCTGTGATCGATCAGCTGGTTCAGGCGCTGACCCAAAGTGGGCAGCTCGATGAAACCTCACCGCTCGGCAAAATGCTCGCCAAGGCCATGGCCGCGGATGGCAAGTCGGCTAACAGCATCGATGACATCACTGCATCGCTCGACAAGCTGATCCACGAAAAGCTCGGCGACAATTTCGGTGCCTCTGCCGGCATCGGCGCGGGTGGCGTTGGCGGGGCGGGTTCTGGTTCAGGTGTCGGCGGCGGTCTGAGCAGCGACGCGGGCGCCGGGCAATCCGATCTGATGAGT…	MQALNSISSLQTSASLFPVSLNSDVSANTSTSSKELKAVIDQLVQALTQSGQLDETSPLGKMLAKAMAADGKSANSIDDITASLDKLIHEKLGDNFGASAGIGAGGVGGAGSGSGVGGGLSSDAGAGQSDLMSQVLNGLGKAVLDDLLTPSGEGGTTFSSDDMPTLEKVAQFMDDNKAQFPTRDGGSWMNELKEDNGLDAQETAQFRSALDVIGQQLGQQQGDASGVTSGGGLGSPVSDSSLGNPAIDANTGPAANGNGSVDVGQLIGQLIDRGLQSVSSGGGLGTPVDNSTQPAGGTPAANPTGNVSNQDLGQLLSGLLQRGLEATLQDAGNTGADLQSSAAQVAAQLINALLQGTNNQTNQAVA	442	+	9131	9163	TGGAACCGATTCGCAGGCCGCTGCCACCTAGTG
Pseudomonas syringae	1	PdpICMP13052	PdpICMP13052|ALQ08_03794	Cluster_13565.1	Type III Effector	PdpICMP13052_Contig_95	+	3148	4374	1227	408	ATGAATATCTCAGGTCTGAACAGACGTCAGGGTACTCAGGCGGAGAATACTGAAGGCGCCTCTTCATCGGTAAATACTCCGCAGCCACAACGTGGTGCAGGTAGACGCCTGCAGCGCCAGGACGCGCTGCCGACGGATACCCGATACAGCGCCAGCCGGACATCAGCTTCGCCGCAAAGCGCGCGCGCGGCGGGAAGATATGAAGCGGGGGGCAGTTCTTCTGGCACGCAGGATACTCAGCAAGCTGAGGGTTCAATGCCTTCGTCGTCCCCCCTCCTACAATTTCGCCTAGGCGGCGGGCGGAACCATTCTGAGCTGGAAAATTTTCATAAAATGATGCTTGACTCACCGAAAGCATCACGGGGAGATGCTATACCGGAGCAGCCCGAAGCAATACCT…	MNISGLNRRQGTQAENTEGASSSVNTPQPQRGAGRRLQRQDALPTDTRYSASRTSASPQSARAAGRYEAGGSSSGTQDTQQAEGSMPSSSPLLQFRLGGGRNHSELENFHKMMLDSPKASRGDAIPEQPEAIPKRLLEKMEGINLPQLALRNKDLHEHAVMVCDQVKNGSGSNKDIIFGDIKMLPLFADVENSRNPGLNLHTFKTNKDFYKAIKEQNKYVQKNKQSLSMRVVYPPLKGMYTHHIALDIQLRHGHRPSIVGFESNPGNLIKLAERDILSALGNVKLNMVGNLIQNSKTDCVMFALNNALKAFKHHDEYTARLHNGEEKVPIPATFLKHAQSKSLVENHPEKDTTVTKDKGGLHAETLLHRNRAYRAKRFAGQHVTSIEGFRMQEIKRAGE…	599	+	2517	2549	TGGAACCAATTGAAAGCCTTTGACCACCCAGCT
Pseudomonas syringae	1	PdpICMP13052	PdpICMP13052|ALQ08_03999	Cluster_2333.2	Type III Effector	PdpICMP13052_Contig_12	+	905	1768	864	287	ATGAACATAACGCCGCTCACGTCAACCGCGGGCAAGGGCTCGTCCGCACAAGGCACAGACAAAATTTCCATTCCCAACTCCACGCGCATGATCAATGCCGCTTCAATCAAGTGGTTGAACAAGGTGCGTAGCGCCATCAGTGACCACATCCGCACCAGCATCGAGAAAGGGAAGCTGTTCGAGCTCGCCTCCTTGGGCAGCAACATGTTCGGTGTCCCGGCCCTTTCGGCGCGCCCCTCGACACTCCAACCTGTGTTGGCGTTTGAGGCTGACCCCAATCACGACCTGAACCTTGTCAGGGTCTATATGCAGGACAGCGCCGGCAAGCTCAATCCTTGGGAGCCGACACCCCACGCGGTCACGACGACGTCGACTCCATCAGAGCCTGATGCGCAGAGC…	MNITPLTSTAGKGSSAQGTDKISIPNSTRMINAASIKWLNKVRSAISDHIRTSIEKGKLFELASLGSNMFGVPALSARPSTLQPVLAFEADPNHDLNLVRVYMQDSAGKLNPWEPTPHAVTTTSTPSEPDAQSDAASSSLPRRPPAGSVLSLLGIALDHAQRHSPRADRSAKGRPGREERNGARFNAKQTKPTEAEAYGDHQTPDPDLTRPKEAAQRVAESINSMREQQNGMQRAEGLLRAKEALQAREAARKQLLDVLEAIQSGREDSTDKKISATERNATGINYQ	22	+	852	883	AGGAACTCATCACCGCGAATCGCCACTCAGCA
Pseudomonas syringae	1	PdpICMP13052	PdpICMP13052|ALQ08_04071	Cluster_7028.1	NA	PdpICMP13052_Contig_134	+	26387	26497	111	36	GTGCCGCCCTGGCAGTTTGAAGAAGTGTCGCCTTCCGCCGCGACAGCCCTTCGAACACGTTTTACGCACCACCGAATGTGCAGTGTCGATTACTACCACCACCTGTATTGA	MPPWQFEEVSPSAATALRTRFTHHRMCSVDYYHHLY	134	+	26222	26253	CGGAACCGAATCGACATTTCGACCACCCATCC
Pseudomonas syringae	1	PdpICMP13052	PdpICMP13052|ALQ08_04197	Cluster_3243.1	Type III Effector	PdpICMP13052_Contig_162	-	5825	7288	1464	487	ATTTCCATGCATATCAACCGACCCGTCCAACAACCGCCTATTGCTTCGAGGGATAGCTTTCATAGTGCGCAAGAGTCTCTTGCCTCCAGCTCTGTGCGATCTGTCAGCTCCACGTCGCAGCGTGAACTGCAAGCGATTACCGATTACCTGACAGATCATGTGTTCGCTGCGCACAAACTGCCGCCGGCCGATTCGGCTGACGGCCAAGCTGCAGTTGATGCACACAATGCGCAGATCACTGCGCTGATAGAAACGCGTGCCAACCGCCTGCACGCCGAAGGGGAAACCCAGGGAACCATCGCCGACACCTTCGCCAAGGCGGAAAAGCTCGACCGATTGGCGACGACTGCATCAAGCGCTTTACGGGCGACACCCTTTGCCGCGGCCTCGGTGCTTCAG…	MSMHINRPVQQPPIASRDSFHSAQESLASSSVRSVSSTSQRELQAITDYLTDHVFAAHKLPPADSADGQAAVDAHNAQITALIETRANRLHAEGETQGTIADTFAKAEKLDRLATTASSALRATPFAAASVLQYMQPAINKGDWLPAPLKPLTPLISGALSGVMDQVGTKMMDRATGDLHYLSASPDKLHDVMAASVKRHSPSLARQVLDTGVAVQTYSARNAVRTVLAPALASRPAVQSAVDLGVSTAGGLVANAGFGNRMLSVQSRDHQRGGALVLGLKDKEPKAQLSEENDWLEAYKAIKSASYSGAALNAGKRMAGLPLDMATDAMGAVRSLVSASSLTQNGLALAGGFAGVGKLQEMATKNITDPATKAAVSQLTNLAGSAAVFAGWTTAALTT…	1451	-	4344	4374	GGGAACCGGTCGCTGCGCTTTGCCACTCACT
Pseudomonas syringae	1	PdpICMP13052	PdpICMP13052|ALQ08_04924	Cluster_4422.1	Type III secretion related protein	PdpICMP13052_Contig_81	-	20458	21438	981	326	CTGGCTATGACTATGGGTGTTTCACCTATTCGTAACTCAAATTCCCTACCCATCGATTTTTCGTCATTGAGCGCAAAGAGTGGCGGGTATAACGGGCTGGGGAGTGGAGGCAATTCGACTATCGACCCGAGTACGTTGTTATTTGGCAATCAAGGGCAGACGCAGGTCAATTTCGCTCCGCCCAACAGCACGGACTCGTCAACCAGCGGTGTGAACGCTGCGTCAGGCAATACGGCGTCCGGCCTGGTCGAGCAAATCATGAGCCTGCTGAAACAATTGATGCAGATGCTGATGCAAAACAACAATGCTTCCGGTAACCCTCAGGCTGATTCGTCAACGCCAGGCGTCGGCAGTGGCAACAGCGTCGGCGGCGGCGATACGGGAAGCAGTCTCGCAAGC…	MAMTMGVSPIRNSNSLPIDFSSLSAKSGGYNGLGSGGNSTIDPSTLLFGNQGQTQVNFAPPNSTDSSTSGVNAASGNTASGLVEQIMSLLKQLMQMLMQNNNASGNPQADSSTPGVGSGNSVGGGDTGSSLASGDGGDETSGVGNGGSGDAGSTPTTSAADGVPSDTSLTGSGGLHLPQQLEQYRGDIMDAAKATGVPPSVIAGQIWAESRGQLNAATTNVNGKADAGLMQVNADTFKSLQQQNPGLLGNDVNDSHTNIMAGALYLRDQNKEFGDMGAALRAYNSGPDKVNKADLSDTGGVGGSSYPADVLNFAKIIESGQGNLPA	82	-	21520	21551	GGGAACCGAGTCATTCAGTGAACCACTCAGTT
Pseudomonas syringae	1	PdpICMP13052	PdpICMP13052|ALQ08_04960	Cluster_418.6	Type III Effector	PdpICMP13052_Contig_85	-	1	4461	4461	1487	ATCAGCGATAAATGGACAGGGAGATTCACCGTGCAGTCATCATCGATCCACCGGACCACCGGAAGCATCATTCAGCCAACCGTCACCCCTGACGCACGTGCTGCAACTGATCTGCAGCAAAGAGCCGAACAACCCAGGCAACGCTCTTCGCACTCGTTGAGCAGTGTCGGCAAGCGGGCGCTGAAGAGCGTCGGTAAATTGTTCCAGAAATCCAAAGCGCCGCAGCAGAAAGCTGCCACGCCGCCCACCGCGAAAAACGTCAAAACTCCCCCGCCCGCTGCAAATGTGGCTACGGCTTCAAATGCAGCTACGCCCAGAAACAAAGCCCGCGAACCCGGTTTTTCCAACAGCAGCCCGCAACATACCCATAGCGCACCCAAGTCGATTCTGCGTACCCAC…	MSDKWTGRFTVQSSSIHRTTGSIIQPTVTPDARAATDLQQRAEQPRQRSSHSLSSVGKRALKSVGKLFQKSKAPQQKAATPPTAKNVKTPPPAANVATASNAATPRNKAREPGFSNSSPQHTHSAPKSILRTHANQASSSGAQTHEIHPEAASRKNLRVRFDLPQDRLERSPSYLDSDNPMTDEEAVANATRQSRSPDSRLQGSDGMRRSMLATDPDQPSSSGSKIGDSDGPIPPRGPMLRRSNGGRFELKDEKLVRNPEPQGTIQLDAKGKPDFSTFNTPGLAPLLDSILANPKQTYLAHESKHGVHGHQLLQANGHLLHLAQDDSSLAVIRSSNEALLIEGKKPPAVKMEREDGNIHIDTASGRKTQELPGKAHIAHITNVLLSHDGERMRVHEDRL…	36	-	4497	4528	TGGAACCCGCTGGCATTGCATGCCACTCATCC
Pseudomonas syringae	1	PdpICMP13052	PdpICMP13052|ALQ08_100113	Cluster_23960.1	Type III secretion related protein	PdpICMP13052_Contig_162	-	1011	1400	390	129	ATGAAACCTCAGTCACCGGATTTCGCCCGCTTCATCAATTCTCTGGGCGCCCAGCTCGGCACGTCACTGACCTTGCAGAACGGCGTATGCGCTCTTTATGACGGTCAGAACAACGAAGCGGCGATCATTGAATTGCCCGAGCACAGTGAGATGGTCATTTTCCATTGCCGCATCGGCCGTTGCCCGGAGCGTGCCCCCGATTTGCAGCGTCTGTTGAGTCTGAACTTTGACGTGGCGCGCTTGCATGGCTGCTGGTTTGCGGTCGACCAGGGCGATGTCCGTCTATGCGCGCAGCGTGAACTGGCCTCACTCGATGAGCCAGCGTTTTGTGACGTGACGCGCGGGTTCATTTCTCAGGCACGTGAAGCGCGTGTTTTCTTACAGGCTTGA	MKPQSPDFARFINSLGAQLGTSLTLQNGVCALYDGQNNEAAIIELPEHSEMVIFHCRIGRCPERAPDLQRLLSLNFDVARLHGCWFAVDQGDVRLCAQRELASLDEPAFCDVTRGFISQAREARVFLQA	43	-	1443	1474	TGGAACCGACGCGGTCCTGTGACCACACATTG
Pseudomonas syringae	1	PdpICMP13052	PdpICMP13052|ALQ08_100953	Cluster_28714.2	Type III secretion related protein	PdpICMP13052_Contig_85	+	10733	11107	375	124	GTGACCATTTCCCAACTCAGCAATTTGAAAAGTGTATCGCCGGAGCTTGGGCAGAATGCTCATCAGGGGCTCGGCTCCGAACCCGTTCAGGCGGATGTCGACCTATTCAATGCGGCGATGCGCCCTGACAGCGGGCCCGCAGCGTCGCACCTGTCCGACCGGATAGCCAGTGCGCTGTCCGAGCGGCTGGGCAGTACCGAGAAGCTTTCACAGCAAGCATTACGCCAGATGAAGAAAGTGTCGAACACCGAAGATCCTGGAGACATCGTGCAGATGAGTCGGGCGTTGTCGCAGTGCTCGTTGCAAGTGGCGTTGACGACCAAGGTCGTGAGCAAGAGCGCTCAGGCGCTCGACAAGTTGACCAACCTGCAGTAG	MTISQLSNLKSVSPELGQNAHQGLGSEPVQADVDLFNAAMRPDSGPAASHLSDRIASALSERLGSTEKLSQQALRQMKKVSNTEDPGDIVQMSRALSQCSLQVALTTKVVSKSAQALDKLTNLQ	1570	+	9131	9163	TGGAACCGATTCGCAGGCCGCTGCCACCTAGTG
Pseudomonas syringae	1	PdpICMP13052	PdpICMP13052|ALQ08_101344	Cluster_29259.1	metabolic process	PdpICMP13052_Contig_137	+	39657	40889	1233	410	ATGTCCGATCCAGTCGCACCTACCTGGCAACTGTCGGATTCTGACCCACACGAGGCATATTCCATGATCAACGGCAGCAGACGTATTCCCCAACCGATCCGCTGGGCTATGGTGGGCGGCGGAAGTCAGAGCCAGATCGGCTACATCCACCGCTGCGCAGCATTGCGTGACAATACCTTTGTACTGGTGGCGGGCGCATTCGACATCGATCCGATAAGAGGCAGCGCCTTTGGCGAACAACTGGGTGTCGATCGCGAACGCTGTTATGCCGATTACCTGAGTATGTTCGAACAGGAGGCCCGGCGTGCAGACGGCATTCAAGCGGTCTCGATCACCACCCCCAATGGCACGCATTACTCCATCACCAAGGCAGCGCTCGAGGCCGGGCTGCACGTGGTG…	MSDPVAPTWQLSDSDPHEAYSMINGSRRIPQPIRWAMVGGGSQSQIGYIHRCAALRDNTFVLVAGAFDIDPIRGSAFGEQLGVDRERCYADYLSMFEQEARRADGIQAVSITTPNGTHYSITKAALEAGLHVVCEKPLCFTVEQAENLRELSHKHNRIVGVTYGYAGHQLIEQAREMIAAGELGDVRMVHMQFAHGFHSAPVEAQSQATQWRVDPRQAGPSYVLGDVGTHPLYLSEVMLPDLKIKRLMCSRQSFVASRAPLEDNAYTLMEYEGGAMGMVWSSAVNAGSMHGQKIRVIGSRASLEWWDERPNQLSFEVQGQPAQILERGMGYLHPNALIDDRIGGGHPEGLFEAWANLYYRFALAMDATDRSDTQALSAVRYPGIDAGVEGVRWVERCVL…	485	+	39141	39172	AGGAACGCGACTATGCTGCGGGCCACTCAGAG
Pseudomonas syringae	1	PdpICMP4330	PdpICMP4330|ALQ28_00085	Cluster_4852.1	Type III secretion related protein	PdpICMP4330_Contig_103	+	39937	41043	1107	368	ATGAAAATCGTCGCTCCGCCTATCATGCGAATACTTCCGGTCGCGCCGACCCGCGTCGTGACGCCTGCTGCGCAGCCACTTCCCAATGCTGATCTGCACAATTCAGGGACTTCGCCACAACAGGTTTCGCGCTTCGCGGCCGCGCTCATCCAGCACAGACGCATCCTCATTCAGCGCGACCTGATCGCCAGCAACAATGCCTTGCAGTCGCGAGCGGTGAAGCTCGGTGAGCTTTATCAACTGCTGATGACCGATCAGGACACCGGGCTGGATAACGCGGCCAGGGTATTGCGCAAAAAGCTCATGCAGGACGACTCGTCCTCAGATCTGAAACAGGTTCTGGATTACACCGACGGTGATGCCGCCAAGGCTCATGTGGTGTTGCAAGCCGCCAGAAAG…	MKIVAPPIMRILPVAPTRVVTPAAQPLPNADLHNSGTSPQQVSRFAAALIQHRRILIQRDLIASNNALQSRAVKLGELYQLLMTDQDTGLDNAARVLRKKLMQDDSSSDLKQVLDYTDGDAAKAHVVLQAARKQAEADGEMGEHVVLTQQLKQLRRKYGPRARAGINSAKAFARPNIDNKRRVALRNLYSVAVSGQPNITGLIEALLGEQQEAGQFNIDLRDMRTAIADDLSAMTPSASHEQLRTLMHGLNTARHVTTLLKGCEHLLGRMRNKNPDLTVDPPAFLKHLLTLTANGMNVNQTLQLTQHIGGKQLKHQLAFLNGLRPMLLQLPILLWRDMKSRQTALSNLLILMAELTTQEQKQLYGGLV	27	+	39878	39910	GGGAACTGATCCGGGACCGTGACCCACTCAGCG
Pseudomonas syringae	1	PdpICMP4330	PdpICMP4330|ALQ28_00088	Cluster_3403.1	Type III secretion related protein	PdpICMP4330_Contig_103	+	45952	46527	576	191	GTGACGATGACCGCACCGATCAAAACCCCGGCCAAAGCGCCACCAGCCCCCCAGCGCTCTGCGCCTGTCGAGCGGCCAGCCACAACTCTCAGTGAAAAACCATTCGGTGAAAAACGCCCTGCATTCGGCGGCTTGGGCCGTGGTGATGTACAGAACAGCCGTTCGGCACTGAGCAAGGCGCTGCAAGACACCCCGGTGAGTGCCGACGGCATGTTCTTTTCGCAACTGCTGGTGCCGCCCGTCAGTGCCGAACCTGATCAGCAAGGCTTTGGCGGTGGCGGTATAGCCTTTCCGGTGCGCGCAGAACAAGTGCCGACCCAACTGATCGACGAGCTGGCGCAGCGCCTGCCGGATCAGCCTGACGGTCCCCTCAGTTTCACCCTGCTGATGCCCAACCTG…	MTMTAPIKTPAKAPPAPQRSAPVERPATTLSEKPFGEKRPAFGGLGRGDVQNSRSALSKALQDTPVSADGMFFSQLLVPPVSAEPDQQGFGGGGIAFPVRAEQVPTQLIDELAQRLPDQPDGPLSFTLLMPNLGSVRVNANKTENRWSVQLGFARRDVLKRLSAHTGACRDSLSQALGQDVELDMHEDLSA	295	+	45626	45657	TGGAACTGAAATCAATGCTCGACCACTTATCA
Pseudomonas syringae	1	PdpICMP4330	PdpICMP4330|ALQ28_00096	Cluster_49085.1	Type III secretion related protein	PdpICMP4330_Contig_103	-	54248	54472	225	74	ATGATCAGTTTCAACAGCTTGCAACGCCATCTCGACAACTCGGTGAGCCGCGCTCACACCAACATGGACCAGGCCGCGATGGAAGCCTCCGAGAGTGGCAACGTCGAAGACCTGCAGGCATTCAACGATGCCCAGCAGCAGGTCGATGTCGCCGGTATTGCTGTCAACGAATGCCTGCGTGCCAAGCACGGTATCAATAAAGAAGTCATCGATGGAATTCAGTGA	MISFNSLQRHLDNSVSRAHTNMDQAAMEASESGNVEDLQAFNDAQQQVDVAGIAVNECLRAKHGINKEVIDGIQ	30	-	54502	54534	TGGAACCGCTCGGCGGGTTTGCTCCACTCAAGG
Pseudomonas syringae	1	PdpICMP4330	PdpICMP4330|ALQ28_01217	Cluster_4528.1	Type III secretion related protein	PdpICMP4330_Contig_174	-	26194	27441	1248	415	ATGAGCATCGGCATCACACCCCGGCCGCAACAGACCACCACGCCACTCGATTTTTCGGCGCTAAGCGGAAAGAGTCCTCAACCAAACACGTTCGGCGAGCAGAACACTCAGCAAGCGATCGACCCGAGTGCACTGTTGTTCGGCAGCGACACACAGAAAGACGTCAACTTCGGCACGCCCGACAGCACCGTCCAGAATCCGCAGGACGCCAGCAAGCCCAACGACAGCCAGTCCAACATCGCTAAATTGATCAGTGCATTGATCATGTCGTTGCTGCAGATGCTCACCAACTCCAATAAAAAGCAGGACACCAATCAGGAACAGCCTGATAGCCAGGCTCCTTTCCAGAACAACGGCGGGCTCGGTACACCGTCGGCCGATAGCGGGGGCGGCGGTACG…	MSIGITPRPQQTTTPLDFSALSGKSPQPNTFGEQNTQQAIDPSALLFGSDTQKDVNFGTPDSTVQNPQDASKPNDSQSNIAKLISALIMSLLQMLTNSNKKQDTNQEQPDSQAPFQNNGGLGTPSADSGGGGTPDATGGGGGGGDTPSATGGGGGGGDTPTATGGGSGGGTPTATGGGEGGVTPQITPQLANPGRTSGTGSVSDTAGSTEQAGKINVVRDTIKVGAGEVFDGHGATYTADKSMGNGDQSENQKSMFELAEGATLKNVNLGENEVDGIHVKAKNAQEVTIDNVHAQNVGEDMITVKGEGGAAVTNLNIKNSSAKGADDKVVQLNANTHLKIDGFKADEFGTLVRPNGKTNFSDMSIELNDVEANHGKFALVKSDSENLKLTTSNIAMTDV…	122	-	27563	27593	GGGAACCGGTCGCTGCGCTTTGCCACTCACT
Pseudomonas syringae	1	PdpICMP4330	PdpICMP4330|ALQ28_01218	Cluster_3390.2	Type III secretion related protein	PdpICMP4330_Contig_174	+	27744	28238	495	164	ATGACCAACAATGACCAGTACCACACCCTTATCAACGAAATCTGCGCACTCAGCCTGATTTCCACACCTGAACGTTTCTATGAATCTGCCAATTTCAAAATCAGCGAAGTGGACTTCACCCTTCAGTTTCAAGACCGCGACGAAGGCCGTGCCGTTCTGATCTACGGTGACATGGGCGCGTTGCCCGCGCGCGGCCGTGAGAGCGCGTTGCTGGCGTTGATGGACATCAACTTTCACATGTTCGCGGGCGCCCATAGCCCGGCATTTTCCTTTAATGCGCAGACCGGTCGTGTGCTGCTGATGGGCTCTGTGGCCCTTGAACGAGCCTCTGCCGAAGGCGTGCTGTTGTTGATGAAGTCGTTTTCCGACCTGGCCAAAGAGTGGCGCGAGCATGGGTTC…	MTNNDQYHTLINEICALSLISTPERFYESANFKISEVDFTLQFQDRDEGRAVLIYGDMGALPARGRESALLALMDINFHMFAGAHSPAFSFNAQTGRVLLMGSVALERASAEGVLLLMKSFSDLAKEWREHGFMGQATTAGASTDQPVAPAAKRESLSAPGRFQ	57	+	27655	27687	AGGAACTGAAATGCCTATGCCTGCGACTCAGTG
Pseudomonas syringae	1	PdpICMP4330	PdpICMP4330|ALQ28_01220	Cluster_23960.1	Type III secretion related protein	PdpICMP4330_Contig_174	+	30537	30926	390	129	ATGAAACCTCAGTCACCGGATTTCGCCCGCTTCATCAATTCTCTGGGCGCCCAGCTCGGCACGTCACTGACCTTGCAGAACGGCGTATGCGCTCTTTATGACGGTCAGAACAACGAAGCGGCGATCATTGAATTGCCCGAGCACAGTGAGATGGTCATTTTCCATTGCCGCATCGGCCGTTGCCCGGAGCGTGCCCCCGATTTGCAGCGTCTGTTGAGTCTGAACTTTGACGTGGCGCGCTTGCATGGCTGCTGGTTTGCGGTCGACCAGGGCGATGTCCGTCTATGCGCGCAGCGTGAACTGGCCTCACTCGATGAGCCAGCGTTTTGTGACGTGACGCGCGGGTTCATTTCTCAGGCACGTGAAGCGCGTGTTTTCTTACAGGCTTGA	MKPQSPDFARFINSLGAQLGTSLTLQNGVCALYDGQNNEAAIIELPEHSEMVIFHCRIGRCPERAPDLQRLLSLNFDVARLHGCWFAVDQGDVRLCAQRELASLDEPAFCDVTRGFISQAREARVFLQA	43	+	30463	30494	TGGAACCGACGCGGTCCTGTGACCACACATTG
Pseudomonas syringae	1	PdpICMP4330	PdpICMP4330|ALQ28_01786	Cluster_406.1	Type III Effector	PdpICMP4330_Contig_225	+	6629	10723	4095	1364	ATGACCTTAAGAATCAATACTCGTTCTGCTACCCCGGTTGTACCTCTGGAAACAGGCTCTTCATCGCAGCCGACACCACCGCCGGTCACGGCAAGACCGACTGAGCCTCCCCCCGTCGCCAATCCTGCTGCGCCTAAATCAGCGCCAGGTGTTCAGCAAGCACACGGGCTGAAGACGCGCATCACTGGCAAGCTTTCCGAACGTCAGACCAATTTCAGTCTTGGAATTCCCGGCACCGGTCGTACTCTCAACCGGCCCCTGCGCAGCGGAATCCCGGAGGAAGGTGAACACCTATCGAGCGAGGAGAGTCATGATCCGTTGCTCAAGGAAGCGCATGAACTGCAGCGCATGGTCGAGTCGGCGCTGACCCATCTGAAAGCGGCGCCGACGTCTCTCTGG…	MTLRINTRSATPVVPLETGSSSQPTPPPVTARPTEPPPVANPAAPKSAPGVQQAHGLKTRITGKLSERQTNFSLGIPGTGRTLNRPLRSGIPEEGEHLSSEESHDPLLKEAHELQRMVESALTHLKAAPTSLWERPAPSTVRRITTKVFPWLKPAPLREVASNGSNGSNAKTKADNSKQSPETIAAAVKELGTRLDHQSKVLATATHALVAAREHLESLEQATPPTSTERLDHARARVQQADSTTRLASQQLRELIQGTEVLQLGALSEGQDQVEQKAEFSQQWLGELRTRMQAVDVRFADRHAAIEIELQLKVAETRELISLDHDMTAAEHTAAQANTQLSALRAQRQETPEGSDEADRLDTAIGQTLATRSQAMQTHQQLAKRLVRVDADVARLNDE…	283	+	6315	6346	CGGAACCGAATCGACATTTCGACCACCCATCC
Pseudomonas syringae	1	PdpICMP4330	PdpICMP4330|ALQ28_02150	Cluster_4702.2	Type III secretion related protein	PdpICMP4330_Contig_279	+	9622	10722	1101	366	ATGCAAGCACTTAACAGCATCAGTTCGTTGCAAACCTCTGCATCATTGTTCCCCGTGTCGCTCAACAGCGATGTGAGCGCCAACACCAGCACTTCCAGCAAAGAGCTCAAGGCTGTGATCGATCAGCTGGTTCAGGCGCTGACCCAAAGTGGGCAGCTCGATGAAACCTCACCGCTCGGCAAAATGCTCGCCAAGGCCATGGCCGCGGATGGCAAGTCGGCTAACAGCATCGATGACATCACTGCATCGCTCGACAAGCTGATCCACGAAAAGCTCGGCGACAATTTCGGTGCCTCTGCCGGCATCGGCGCGGGTGGCGTTGGCGGGGCGGGTTCTGGTTCAGGTGTCGGCGGCGGTCTGAGCAGCGACGCGGGCGCCGGGCAATCCGATCTGATGAGT…	MQALNSISSLQTSASLFPVSLNSDVSANTSTSSKELKAVIDQLVQALTQSGQLDETSPLGKMLAKAMAADGKSANSIDDITASLDKLIHEKLGDNFGASAGIGAGGVGGAGSGSGVGGGLSSDAGAGQSDLMSQVLNGLGKAVLDDLLTPSGEGGTTFSSDDMPTLEKVAQFMDDNKAQFPTRDGGSWMNELKEDNGLDAQETAQFRSALDVIGQQLGQQQGDASGVTSGGGLGSPVSDSSLGNPAIDANTGPAANGNGSVDVGQLIGQLIDRGLQSVSSGGGLGTPVDNSTQPAGGTPAANPTGNVSNQDLGQLLSGLLQRGLEATLQDAGNTGADLQSSAAQVAAQLINALLQGTNNQTNQAVA	442	+	9148	9180	TGGAACCGATTCGCAGGCCGCTGCCACCTAGTG
Pseudomonas syringae	1	PdpICMP4330	PdpICMP4330|ALQ28_02878	Cluster_13565.1	Type III Effector	PdpICMP4330_Contig_48	-	8159	9385	1227	408	ATGAATATCTCAGGTCTGAACAGACGTCAGGGTACTCAGGCGGAGAATACTGAAGGCGCCTCTTCATCGGTAAATACTCCGCAGCCACAACGTGGTGCAGGTAGACGCCTGCAGCGCCAGGACGCGCTGCCGACGGATACCCGATACAGCGCCAGCCGGACATCAGCTTCGCCGCAAAGCGCGCGCGCGGCGGGAAGATATGAAGCGGGGGGCAGTTCTTCTGGCACGCAGGATACTCAGCAAGCTGAGGGTTCAATGCCTTCGTCGTCCCCCCTCCTACAATTTCGCCTAGGCGGCGGGCGGAACCATTCTGAGCTGGAAAATTTTCATAAAATGATGCTTGACTCACCGAAAGCATCACGGGGAGATGCTATACCGGAGCAGCCCGAAGCAATACCT…	MNISGLNRRQGTQAENTEGASSSVNTPQPQRGAGRRLQRQDALPTDTRYSASRTSASPQSARAAGRYEAGGSSSGTQDTQQAEGSMPSSSPLLQFRLGGGRNHSELENFHKMMLDSPKASRGDAIPEQPEAIPKRLLEKMEGINLPQLALRNKDLHEHAVMVCDQVKNGSGSNKDIIFGDIKMLPLFADVENSRNPGLNLHTFKTNKDFYKAIKEQNKYVQKNKQSLSMRVVYPPLKGMYTHHIALDIQLRHGHRPSIVGFESNPGNLIKLAERDILSALGNVKLNMVGNLIQNSKTDCVMFALNNALKAFKHHDEYTARLHNGEEKVPIPATFLKHAQSKSLVENHPEKDTTVTKDKGGLHAETLLHRNRAYRAKRFAGQHVTSIEGFRMQEIKRAGE…	599	-	9984	10016	TGGAACCAATTGAAAGCCTTTGACCACCCAGCT
Pseudomonas syringae	1	PdpICMP4330	PdpICMP4330|ALQ28_03605	Cluster_6364.1	Type III Effector	PdpICMP4330_Contig_84	+	13926	15068	1143	380	ATGAACCCCATTCAGTCACGCTTCTCCAGTGTGCAAGAGCTCAGACGATCCAACGTTGATATTCCGGCGCTCAAAGCCAATGGCCAACTGGAGGTCGACGGCAAGAGGTACGAGATACGTGCAGCCGATGACGGAACAATCTCGGTCCTTCGACCGGAACAACAATCCAAAGCGAAAGGTTTTTTCAAAGGCGCTTCCCAGTTGATAGGTGGCAGCAGCCAGCGCGCGCAGATTGCCCAGGCGCTCAACGAGAAGGTCGCATCGGCACGCACTGTCTTGCACCAGAGCGCTATGACGGGCGGACGCTTTGACACCCTTGAGCGGGGCGAAAGCAGCTCAGCCACAACAGCCATCAAACCCACTGCCAACCAGGCTGCGCAAAGTACTTTTAACAGCTTT…	MNPIQSRFSSVQELRRSNVDIPALKANGQLEVDGKRYEIRAADDGTISVLRPEQQSKAKGFFKGASQLIGGSSQRAQIAQALNEKVASARTVLHQSAMTGGRFDTLERGESSSATTAIKPTANQAAQSTFNSFHEWAKQAEAMQNPSRMDIYKIYKQDAPHSHPMSDEQQEEFLHTLKELNGKKGIEVRTQDHDNVRNKKDRNLDKYIAESPNAKKFFYRITPKHERREDKHQGRLTIGVQPQYAAQLTRAMATLIEKESAITQGKVIGPAYHGQMTDSAVLYINGDVAKAEKLGEKLKQMSGIPLDAFVEHTPLSMQSLSKGLSYAESILGDTRGHGMSRAEVISDALRMDGMPFLARLKLSLSANGYDPDNPALRNTK	455	+	13439	13471	TGGAACCGCCTCGAGCAGAGGCTCCACTCATTG
Pseudomonas syringae	1	PdpICMP4330	PdpICMP4330|ALQ28_03854	Cluster_4422.1	Type III secretion related protein	PdpICMP4330_Contig_95	+	117776	118750	975	324	ATGACTATGGGTGTTTCACCTATTCGTAACTCAAATTCCCTACCCATCGATTTTTCGTCATTGAGCGCAAAGAGTGGCGGGTATAACGGGCTGGGGAGTGGAGGCAATTCGACTATCGACCCGAGTACGTTGTTATTTGGCAATCAAGGGCAGACGCAGGTCAATTTCGCTCCGCCCAACAGCACGGACTCGTCAACCAGCGGTGTGAACGCTGCGTCAGGCAATACGGCGTCCGGCCTGGTCGAGCAAATCATGAGCCTGCTGAAACAATTGATGCAGATGCTGATGCAAAACAACAATGCTTCCGGTAACCCTCAGGCTGATTCGTCAACGCCAGGCGTCGGCAGTGGCAACAGCGTCGGCGGCGGCGATACGGGAAGCAGTCTCGCAAGCGGCGAC…	MTMGVSPIRNSNSLPIDFSSLSAKSGGYNGLGSGGNSTIDPSTLLFGNQGQTQVNFAPPNSTDSSTSGVNAASGNTASGLVEQIMSLLKQLMQMLMQNNNASGNPQADSSTPGVGSGNSVGGGDTGSSLASGDGGDETSGVGNGGLGDAGSTPTTSAADGVPSDTSLTGSGGLHLPQQLEQYRGDIMDAAKATGVPPSVIAGQIWAESRGQLNAATTNVNGKADAGLMQVNADTFKSLQQQNPGLLGNDVNDSHTNIMAGALYLRDQNKEFGDMGAALRAYNSGPDKVNKADLSDTGGVGGSSYPADVLNFAKIIESGQGNLPA	88	+	117657	117688	GGGAACCGAGTCATTCAGTGAACCACTCAGTT
Pseudomonas syringae	1	PdpICMP4330	PdpICMP4330|ALQ28_04506	Cluster_418.3	Type III Effector	PdpICMP4330_Contig_279	-	1	4478	4478	1493	ATCAGCGATAAATGGACAGGGAGATTCACCGTGCAGTCATCATCGATCCACCGGACCACCGGAAGCATCATTCAGCCAACCGTCACCCCTGACGCACGTGCTGCAACTGATCTGCAGCAAAGAGCCGAACAACCCAGGCAACGCTCTTCGCACTCGTTGAGCAGTGTCGGCAAGCGGGCGCTGAAGAGCGTCGGTAAATTGTTCCAGAAATCCAAAGCGCCGCAGCAGAAAGCTGCCACGCCGCCCACCGCGAAAAACGTCAAAACTCCCCCGCCCGCTGCAAATGTGGCTACGGCTTCAAATGCAGCTACGCCCAGAAACAAAGCCCGCGAACCCGGTTTTTCCAACAGCAGCCCGCAACATACCCATAGCGCACCCAAGTCGATTCTGCGTACCCAC…	MSDKWTGRFTVQSSSIHRTTGSIIQPTVTPDARAATDLQQRAEQPRQRSSHSLSSVGKRALKSVGKLFQKSKAPQQKAATPPTAKNVKTPPPAANVATASNAATPRNKAREPGFSNSSPQHTHSAPKSILRTHANQASSSGAQTHEIHPEAASRKNLRVRFDLPQDRLERSPSYLDSDNPMTDEEAVANATRQSRSPDSRLQGSDGMRRSMLATDPDQPSSSGSKIGDSDGPIPPRGPMLRRSNGGRFELKDEKLVRNPEPQGTIQLDAKGKPDFSTFNTPGLAPLLDSILANPKQTYLAHESKHGVHGHQLLQANGHLLHLAQDDSSLAVIRSSNEALLIEGKKPPAVKMEREDGNIHIDTASGRKTQELPGKAHIAHITNVLLSHDGERMRVHEDRL…	36	-	4514	4545	TGGAACCCGCTGGCATTGCATGCCACTCATCC
Pseudomonas syringae	1	PdpICMP4330	PdpICMP4330|ALQ28_04762	Cluster_2089.2	Type III Effector	PdpICMP4330_Contig_60	-	10271	11557	1287	428	CTGAGGACTGAGCCTGTGTTGAACAAGCCGACGTTGAACGGGATTGCCTCTACCGCACAAGCCGCTGCTTCCCATGCCGTCGAGGGCCCCATAAGCCCCGCGCCGATGCGACTGGATGCAGCGCAAGGTCAGCGACCACTGCCACCGATGGACGCGCCATCGTCGCTGCGCTTGCGAGCATCAGCCGCACCTACCGGTGAGGAGACGCACGCGAGTACGGCAACATCCGGCAGCACGGCAACGGATGAAGCTGCCCCGGCGCCTGCTCGACAAGCATCGACTATCAATCCGATCAAGCTTTTTGCTCAGATGATGGTGGGCGTTCTTTCCTTGACTGCCGGATACCGTGCGGCGAGATTTCCAGGAGACTTTGCGAAAGATCCGGGCGGCAGTTTATGG…	MRTEPVLNKPTLNGIASTAQAAASHAVEGPISPAPMRLDAAQGQRPLPPMDAPSSLRLRASAAPTGEETHASTATSGSTATDEAAPAPARQASTINPIKLFAQMMVGVLSLTAGYRAARFPGDFAKDPGGSLWAAINLDHRSSPADLTQGNHTVLERYGAYIPKDSGCFKAKADVTHDIPSGVAGQWNFKTRQVKLNPNIALGRHPAEVAGHEFIHCYTHPEFRDRHINHPHWKALNEGLTTHLTEKLPEPKRLLPIALDKDPYHGFKLTTGDSWPDAAKRIEGAVGEDTLLKAFFGGDDDAISEVAKAAAQIYPRLASSRTEQELYRAGMMRGSQQLAECYAGALLASGQPLPESWSRNMLPVFSFSDMQPEQAKKAQLQAEQSHERMGIIFDAAFFS…	418	-	11975	12007	GGGAACCACCGCGTGGGTTCCAGCCACTCACCG
Pseudomonas syringae	1	PdpICMP4330	PdpICMP4330|ALQ28_100861	Cluster_2089.1	Type III secretion related protein	PdpICMP4330_Contig_60	-	11554	11952	399	132	CTGGCAATGAACTCATCACTCACCCTGCAAAAGCTGCTTGATAGGCGTGGTCAGGCGGCCAACGGAAATTCTGCAACGGAGGCCGTACAGTGGCAGGAAGGAATGAACCTGACGCTGCATGTAAGCGGCGATAGCCTCACGATGCTGGCCGAAATCATCGATCTGCGTGCCGACCCTCAGGACGACATCCTCTTGCGCAAGCTGCTTGCCCATGCTTTTCCCGGCCTGCGGCTACGACGCGGCGCGTTGACCATCAACCCGGACGAGAACACGTTGGTGTACTCCTACGAGCATGACTTTCTCACGCTGGACAAGGCCCGATTCGAAAATCTGCTGGCTAATTTTGCCGAAACAACGCAGGAGTTGCGTAACACCGCGCAGCGCCTGCGTTACCGCTGA	MAMNSSLTLQKLLDRRGQAANGNSATEAVQWQEGMNLTLHVSGDSLTMLAEIIDLRADPQDDILLRKLLAHAFPGLRLRRGALTINPDENTLVYSYEHDFLTLDKARFENLLANFAETTQELRNTAQRLRYR	23	-	11975	12007	GGGAACCACCGCGTGGGTTCCAGCCACTCACCG
Pseudomonas syringae	1	PdpICMP4330	PdpICMP4330|ALQ28_100892	Cluster_28714.2	Type III secretion related protein	PdpICMP4330_Contig_279	+	10750	11124	375	124	GTGACCATTTCCCAACTCAGCAATTTGAAAAGTGTATCGCCGGAGCTTGGGCAGAATGCTCATCAGGGGCTCGGCTCCGAACCCGTTCAGGCGGATGTCGACCTATTCAATGCGGCGATGCGCCCTGACAGCGGGCCCGCAGCGTCGCACCTGTCCGACCGGATAGCCAGTGCGCTGTCCGAGCGGCTGGGCAGTACCGAGAAGCTTTCACAGCAAGCATTACGCCAGATGAAGAAAGTGTCGAACACCGAAGATCCTGGAGACATCGTGCAGATGAGTCGGGCGTTGTCGCAGTGCTCGTTGCAAGTGGCGTTGACGACCAAGGTCGTGAGCAAGAGCGCTCAGGCGCTCGACAAGTTGACCAACCTGCAGTAG	MTISQLSNLKSVSPELGQNAHQGLGSEPVQADVDLFNAAMRPDSGPAASHLSDRIASALSERLGSTEKLSQQALRQMKKVSNTEDPGDIVQMSRALSQCSLQVALTTKVVSKSAQALDKLTNLQ	1570	+	9148	9180	TGGAACCGATTCGCAGGCCGCTGCCACCTAGTG
Pseudomonas syringae	1	PdpICMP4330	PdpICMP4330|ALQ28_101796	Cluster_8056.2	NA	PdpICMP4330_Contig_106	+	16641	17543	903	300	ATGACTACTTCCTCAACCACGCCTGACACGGGTTTGGGCCGGCATATTACTCTGCGCACTCGAGGGGCGGCAGGAAATGGACCTATAACCCGCCTGATGAGTCCATCTGATCTGGGTCAGCTCCTCAAACCATTCGTGTTTCTTGATATTTTTGACGTCAGTGGCGATGCCGTCCACGCGATGGAGAGCATGCCCATACACCCTCATTCCGGCATAGCGACGGTGACCGTATTCACAGAAGGCAGGGTGCGCTATGACGATCCGGGAAATGGGCAAGGCACCTTCGGTTACGGTGGTGTCGAATGGATGCGGGCAGGTGGTGGCATTTGGCATGGTAAAGAACTGACTGCCGAAGAGGTTCCTCGTATCCAGGGATTTCAACTGTGGATTGCCTTGCCG…	MTTSSTTPDTGLGRHITLRTRGAAGNGPITRLMSPSDLGQLLKPFVFLDIFDVSGDAVHAMESMPIHPHSGIATVTVFTEGRVRYDDPGNGQGTFGYGGVEWMRAGGGIWHGKELTAEEVPRIQGFQLWIALPADLENAEPESRYIESVGTIEGQPAHVILGNYQGVQSPVPAPEGVNYLLVTLKPGERWVYHPPIGHSVGWLAVAKGALNAEGVVRAGEMVSFDASELPITLHASDPEGAVFVLGSAVPHPHPLHLGYYSVHTNAQSLEKGERRIAELGKKLQAAGDRRTESGTTPVFR	1838	+	19381	19412	AGGAACGCGACTATGCTGCGGGCCACTCAGAG
Pseudomonas syringae	1	PdpICMP4330	PdpICMP4330|ALQ28_102624	Cluster_32807.1	NA	PdpICMP4330_Contig_106	+	16145	16615	471	156	TTGGCCAATGTATCGCCCTCTGTTAACTCCTCTACGTTCGGCTCCGCGCCGTATAAAGTGAACACTGATATGAGCAACCAAGCTTTCAATCAATCCGGCAGTACGAGCAACGCGTTCAAGTACACATCCCTCGGATTACGTTTAATAGCTGCCCTGGCGTTTCTGGCCGCTGGCGGTGCCAAGCTCGCCGGCGTGCCCATGATGGTCGAGATCTTCGACCATATTGGCTTGGGTCAGTGGTTTCGTACCGTGACGGGGTTGATCGAGATCGTCGCTGCTGTCGCCTTGTTCATACCGGTCACCATCGGGTTGGGAGGGCTGCTGCTGGCGGTCACCATGTGCGTTGCGATTTTCACTCACCTCTTCGTTATCGGGGGTAGCCCTGTACCGGCAATCTTT…	MANVSPSVNSSTFGSAPYKVNTDMSNQAFNQSGSTSNAFKYTSLGLRLIAALAFLAAGGAKLAGVPMMVEIFDHIGLGQWFRTVTGLIEIVAAVALFIPVTIGLGGLLLAVTMCVAIFTHLFVIGGSPVPAIFLLLVTAAIAWLHRASILNLIRPV	2766	+	19381	19412	AGGAACGCGACTATGCTGCGGGCCACTCAGAG
Pseudomonas syringae	1	PdpICMP4330	PdpICMP4330|ALQ28_103234	Cluster_988.1	NA	PdpICMP4330_Contig_39	+	43312	44439	1128	375	GTGTCGGGTCGGTGTTGTGCATTTCCAGCAAGTCTTCACGGACAGCTTTCTGTTTCATCTGCCACTGACGGCGAGCCACTTTGGGTGTTTTTGATAATGTGGGGCATGGATTTGCGAGGGTTTGACAGGATTGCAGCGTGCCTTGTGTTGCTGCTGTGTGGCGGCTGTGGTCAGGAGCGCAAGCTGGAGAGCTTTGGCGGGCCAACCATGGGCAGTCACTATTCCGTGGTGTATGTCCGCGGTGCCGGGCAGCCTGACCCGGCGGTAATGCGCCCGGAGGTCGAAGCCATTCTGGCTGACGTCGATCAACAGATGTCGCTGTGGCGCAGTGACTCGGACATCGAACGTTTCAATGCGTTGCCAGCCAACAGCTGCCAGATCATGTCCACGTCGGTTTTG…	MSGRCCAFPASLHGQLSVSSATDGEPLWVFLIMWGMDLRGFDRIAACLVLLLCGGCGQERKLESFGGPTMGSHYSVVYVRGAGQPDPAVMRPEVEAILADVDQQMSLWRSDSDIERFNALPANSCQIMSTSVLHLIGVGEQLSRESDGAFDLTVKPLLDLWGLGAHALFEQMPLVRQLARTRALVGYRNLRIVGQQLCKNAAVQVDLNSIAAGYAVDRITERMDALGVHDYMVQATGELKVSGLKPDGSPWRVTLEAPSDDGYDAQKMFPLTGHAMSTSGDYRRYRDGNGRHISDTLDALTGSPVNHGLASVTVLHPSALMADGLSSLLLILGPERGWNYAQEHKIPAFFVIRADKRFIIRSNASFDRLAVRSPQ	15	+	43264	43297	TGGGAACCCTGCGCAGGTCATTGACCACTCAGTG
Pseudomonas syringae	1	PdpICMP4330	PdpICMP4330|ALQ28_104137	Cluster_7028.1	NA	PdpICMP4330_Contig_225	+	6480	6590	111	36	GTGCCGCCCTGGCAGTTTGAAGAAGTGTCGCCTTCCGCCGCGACAGCCCTTCGAACACGTTTTACGCACCACCGAATGTGCAGTGTCGATTACTACCACCACCTGTATTGA	MPPWQFEEVSPSAATALRTRFTHHRMCSVDYYHHLY	134	+	6315	6346	CGGAACCGAATCGACATTTCGACCACCCATCC
Pseudomonas syringae	1	PdpICMP5014	PdpICMP5014|ALQ27_00493	Cluster_4702.2	Type III secretion related protein	PdpICMP5014_Contig_130	+	9627	10727	1101	366	ATGCAAGCACTTAACAGCATCAGTTCGTTGCAAACCTCTGCATCATTGTTCCCCGTGTCGCTCAACAGCGATGTGAGCGCCAACACCAGCACTTCCAGCAAAGAGCTCAAGGCTGTGATCGATCAGCTGGTTCAGGCGCTGACCCAAAGTGGGCAGCTCGATGAAACCTCACCGCTCGGCAAAATGCTCGCCAAGGCCATGGCCGCGGATGGCAAGTCGGCTAACAGCATCGATGACATCACTGCATCGCTCGACAAGCTGATCCACGAAAAGCTCGGCGACAATTTCGGTGCCTCTGCCGGCATCGGCGCGGGTGGCGTTGGCGGGGCGGGTTCTGGTTCAGGTGTCGGCGGCGGTCTGAGCAGCGACGCGGGCGCCGGGCAATCCGATCTGATGAGT…	MQALNSISSLQTSASLFPVSLNSDVSANTSTSSKELKAVIDQLVQALTQSGQLDETSPLGKMLAKAMAADGKSANSIDDITASLDKLIHEKLGDNFGASAGIGAGGVGGAGSGSGVGGGLSSDAGAGQSDLMSQVLNGLGKAVLDDLLTPSGEGGTTFSSDDMPTLEKVAQFMDDNKAQFPTRDGGSWMNELKEDNGLDAQETAQFRSALDVIGQQLGQQQGDASGVTSGGGLGSPVSDSSLGNPAIDANTGPAANGNGSVDVGQLIGQLIDRGLQSVSSGGGLGTPVDNSTQPAGGTPAANPTGNVSNQDLGQLLSGLLQRGLEATLQDAGNTGADLQSSAAQVAAQLINALLQGTNNQTNQAVA	442	+	9153	9185	TGGAACCGATTCGCAGGCCGCTGCCACCTAGTG
Pseudomonas syringae	1	PdpICMP5014	PdpICMP5014|ALQ27_00496	Cluster_49085.1	Type III secretion related protein	PdpICMP5014_Contig_130	+	13183	13407	225	74	ATGATCAGTTTCAACAGCTTGCAACGCCATCTCGACAACTCGGTGAGCCGCGCTCACACCAACATGGACCAGGCCGCGATGGAAGCCTCCGAGAGTGGCAACGTCGAAGACCTGCAGGCATTCAACGATGCCCAGCAGCAGGTCGATGTCGCCGGTATTGCTGTCAACGAATGCCTGCGTGCCAAGCACGGTATCAATAAAGAAGTCATCGATGGAATTCAGTGA	MISFNSLQRHLDNSVSRAHTNMDQAAMEASESGNVEDLQAFNDAQQQVDVAGIAVNECLRAKHGINKEVIDGIQ	30	+	13121	13153	TGGAACCGCTCGGCGGGTTTGCTCCACTCAAGG
Pseudomonas syringae	1	PdpICMP5014	PdpICMP5014|ALQ27_00505	Cluster_3403.1	Type III secretion related protein	PdpICMP5014_Contig_130	-	21128	21697	570	189	ATGACCGCACCGATCAAAACCCCGGCCAAAGCGCCACCAGCCCCCCAGCGCTCTGCGCCTGTCGAGCGGCCAGCCACAACTCTCAGTGAAAAACCATTCGGTGAAAAACGCCCTGCATTCGGCGGCTTGGGCCGTGGTGATGTACAGAACAGCCGTTCGGCACTGAGCAAGGCGCTGCAAGACACCCCGGTGAGTGCCGACGGCATGTTCTTTTCGCAACTGCTGGTGCCGCCCGTCAGTGCCGAACCTGATCAGCAAGGCTTTGGCGGTGGCGGTATAGCCTTTCCGGTGCGCGCAGAACAAGTGCCGACCCAACTGATCGACGAGCTGGCGCAGCGCCTGCCGGATCAGCCTGACGGTCCCCTCAGTTTCACCCTGCTGATGCCCAACCTGGGCAGC…	MTAPIKTPAKAPPAPQRSAPVERPATTLSEKPFGEKRPAFGGLGRGDVQNSRSALSKALQDTPVSADGMFFSQLLVPPVSAEPDQQGFGGGGIAFPVRAEQVPTQLIDELAQRLPDQPDGPLSFTLLMPNLGSVRVNANKTENRWSVQLGFARRDVLKRLSAHTGACRDSLSQALGQDVELDMHEDLSA	301	-	21998	22029	TGGAACTGAAATCAATGCTCGACCACTTATCA
Pseudomonas syringae	1	PdpICMP5014	PdpICMP5014|ALQ27_00870	Cluster_3243.1	Type III Effector	PdpICMP5014_Contig_156	+	21631	23088	1458	485	ATGCATATCAACCGACCCGTCCAACAACCGCCTATTGCTTCGAGGGATAGCTTTCATAGTGCGCAAGAGTCTCTTGCCTCCAGCTCTGTGCGATCTGTCAGCTCCACGTCGCAGCGTGAACTGCAAGCGATTACCTATTACCTGACAGATCATGTGTTCGCTGCGCACAAACTGCCGCCGGCCGATTCGGCTGACGGCCAAGCTGCAGTTGATGCACACAATGCGCAGATCACTGCGCTGATAGAAACGCGTGCCAACCGCCTGCACGCCGAAGGGGAAACCCAGGGAACCATCGCCGACACCTTCGCCAAGGCGGAAAAGCTCGACCGATTGGCGACGACTGCATCAAGCGCTTTACGGGCGACACCCTTTGCCGCGGCCTCGGTGCTTCAGTACATG…	MHINRPVQQPPIASRDSFHSAQESLASSSVRSVSSTSQRELQAITYYLTDHVFAAHKLPPADSADGQAAVDAHNAQITALIETRANRLHAEGETQGTIADTFAKAEKLDRLATTASSALRATPFAAASVLQYMQPAINKGDWLPAPLKPLTPLISGALSGVMDQVGTKMMDRATGDLHYLSASPDKLHDVMAASVKRHSPSLARQVLDTGVAVQTYSARNAVRTVLAPALASRPAVQSAVDLGVSTAGGLVANAGFGNRMLSVQSRDHQRGGALVLGLKDKEPKAQLSEENDWLEAYKAIKSASYSGAALNAGKRMAGLPLDMATDAMGAVRSLVSASSLTQNGLALAGGFAGVGKLQEMATKNITDPATKAAVSQLTNLAGSAAVFAGWTTAALTTDP…	1451	+	24539	24569	GGGAACCGGTCGCTGCGCTTTGCCACTCACT
Pseudomonas syringae	1	PdpICMP5014	PdpICMP5014|ALQ27_00871	Cluster_3390.2	Type III secretion related protein	PdpICMP5014_Contig_156	+	24720	25214	495	164	ATGACCAACAATGACCAGTACCACACCCTTATCAACGAAATCTGCGCACTCAGCCTGATTTCCACACCTGAACGTTTCTATGAATCTGCCAATTTCAAAATCAGCGAAGTGGACTTCACCCTTCAGTTTCAAGACCGCGACGAAGGCCGTGCCGTTCTGATCTACGGTGACATGGGCGCGTTGCCCGCGCGCGGCCGTGAGAGCGCGTTGCTGGCGTTGATGGACATCAACTTTCACATGTTCGCGGGCGCCCATAGCCCGGCATTTTCCTTTAATGCGCAGACCGGTCGTGTGCTGCTGATGGGCTCTGTGGCCCTTGAACGAGCCTCTGCCGAAGGCGTGCTGTTGTTGATGAAGTCGTTTTCCGACCTGGCCAAAGAGTGGCGCGAGCATGGGTTC…	MTNNDQYHTLINEICALSLISTPERFYESANFKISEVDFTLQFQDRDEGRAVLIYGDMGALPARGRESALLALMDINFHMFAGAHSPAFSFNAQTGRVLLMGSVALERASAEGVLLLMKSFSDLAKEWREHGFMGQATTAGASTDQPVAPAAKRESLSAPGRFQ	57	+	24631	24663	AGGAACTGAAATGCCTATGCCTGCGACTCAGTG
Pseudomonas syringae	1	PdpICMP5014	PdpICMP5014|ALQ27_01070	Cluster_2089.1	Type III secretion related protein	PdpICMP5014_Contig_171	+	16376	16768	393	130	ATGAACTCATCACTCACCCTGCAAAAGCTGCTTGATAGGCGTGGTCAGGCGGCCAACGGAAATTCTGCAACGGAGGCCGTACAGTGGCAGGAAGGAATGAACCTGACGCTGCATGTAAGCGGCGATAGCCTCACGATGCTGGCCGAAATCATCGATCTGCGTGCCGACCCTCAGGACGACATCCTCTTGCGCAAGCTGCTTGCCCATGCTTTTCCCGGCCTGCGGCTACGACGCGGCGCGTTGACCATCAACCCGGACGAGAACACGTTGGTGTACTCCTACGAGCATGACTTTCTCACGCTGGACAAGGCCCGATTCGAAAATCTGCTGGCTAATTTTGCCGAAACAACGCAGGAGTTGCGTAACACCGCGCAGCGCCTGCGTTACCGCTGA	MNSSLTLQKLLDRRGQAANGNSATEAVQWQEGMNLTLHVSGDSLTMLAEIIDLRADPQDDILLRKLLAHAFPGLRLRRGALTINPDENTLVYSYEHDFLTLDKARFENLLANFAETTQELRNTAQRLRYR	29	+	16315	16347	GGGAACCACCGCGTGGGTTCCAGCCACTCACCG
Pseudomonas syringae	1	PdpICMP5014	PdpICMP5014|ALQ27_01407	Cluster_6364.1	Type III Effector	PdpICMP5014_Contig_200	+	2173	3315	1143	380	ATGAACCCCATTCAGTCACGCTTCTCCAGTGTGCAAGAGCTCAGACGATCCAACGTTGATATTCCGGCGCTCAAAGCCAATGGCCAACTGGAGGTCGACGGCAAGAGGTACGAGATACGTGCAGCCGATGACGGAACAATCTCGGTCCTTCGACCGGAACAACAATCCAAAGCGAAAGGTTTTTTCAAAGGCGCTTCCCAGTTGATAGGTGGCAGCAGCCAGCGCGCGCAGATTGCCCAGGCGCTCAACGAGAAGGTCGCATCGGCACGCACTGTCTTGCACCAGAGCGCTATGACGGGCGGACGCTTTGACACCCTTGAGCGGGGCGAAAGCAGCTCAGCCACAACAGCCATCAAACCCACTGCCAACCAGGCTGCGCAAAGTACTTTTAACAGCTTT…	MNPIQSRFSSVQELRRSNVDIPALKANGQLEVDGKRYEIRAADDGTISVLRPEQQSKAKGFFKGASQLIGGSSQRAQIAQALNEKVASARTVLHQSAMTGGRFDTLERGESSSATTAIKPTANQAAQSTFNSFHEWAKQAEAMQNPSRMDIYKIYKQDAPHSHPMSDEQQEEFLHTLKELNGKKGIEVRTQDHDNVRNKKDRNLDKYIAESPNAKKFFYRITPKHERREDKHQGRLTIGVQPQYAAQLTRAMATLIEKESAITQGKVIGPAYHGQMTDSAVLYINGDVAKAEKLGEKLKQMSGIPLDAFVEHTPLSMQSLSKGLSYAESILGDTRGHGMSRAEVISDALRMDGMPFLARLKLSLSANGYDPDNPALRNTK	455	+	1686	1718	TGGAACCGCCTCGAGCAGAGGCTCCACTCATTG
Pseudomonas syringae	1	PdpICMP5014	PdpICMP5014|ALQ27_01755	Cluster_4422.1	Type III secretion related protein	PdpICMP5014_Contig_237	+	1121	2095	975	324	ATGACTATGGGTGTTTCACCTATTCGTAACTCAAATTCCCTACCCATCGATTTTTCGTCATTGAGCGCAAAGAGTGGCGGGTATAACGGGCTGGGGAGTGGAGGCAATTCGACTATCGACCCGAGTACGTTGTTATTTGGCAATCAAGGGCAGACGCAGGTCAATTTCGCTCCGCCCAACAGCACGGACTCGTCAACCAGCGGTGTGAACGCTGCGTCAGGCAATACGGCGTCCGGCCTGGTCGAGCAAATCATGAGCCTGCTGAAACAATTGATGCAGATGCTGATGCAAAACAACAATGCTTCCGGTAACCCTCAGGCTGATTCGTCAACGCCAGGCGTCGGCAGTGGCAACAGCGTCGGCGGCGGCGATACGGGAAGCAGTCTCGCAAGCGGCGAC…	MTMGVSPIRNSNSLPIDFSSLSAKSGGYNGLGSGGNSTIDPSTLLFGNQGQTQVNFAPPNSTDSSTSGVNAASGNTASGLVEQIMSLLKQLMQMLMQNNNASGNPQADSSTPGVGSGNSVGGGDTGSSLASGDGGDETSGVGNGGLGDAGSTPTTSAADGVPSDTSLTGSGGLHLPQQLEQYRGDIMDAAKATGVPPSVIAGQIWAESRGQLNAATTNVNGKADAGLMQVNADTFKSLQQQNPGLLGNDVNDSHTNIMAGALYLRDQNKEFGDMGAALRAYNSGPDKVNKADLSDTGGVGGSSYPADVLNFAKIIESGQGNLPA	88	+	1002	1033	GGGAACCGAGTCATTCAGTGAACCACTCAGTT
Pseudomonas syringae	1	PdpICMP5014	PdpICMP5014|ALQ27_03977	Cluster_452.1	Type III Effector	PdpICMP5014_Contig_17	-	47535	53408	5874	1957	ATGGTCAAGGTTACCTCTTCCGGATTTACTGCCAACCCCCTCTCTCATCATGCGGACAGTGTCTCCCCCGCGAACAGCCCCCCTCAGTTACCGGAGCCTGTGCCTCTGGTTGATCTAAGCGAGTCGTCCCGCAAGGGCGGCATGCGAAATCGGCCGCATGCCAGTTTGAACAGTCAGGTGCTCGGACTGCAAGCGGTGCCGTCGCAACGTGGAAAGCATGTTCGTGTCAGAAGTCATGCCGATGGCGAGAGCGTCATTAATGCTTGGCTGGCAAAGCGACCCTCGGTTCAAAGCGAAACCAGCCTTGGTAACGATGGCAAGCTGGTGCGTTATAACGCTGTGAATCATGAACCGCTGGCGCCGCGCAATGAGGCGTTTTTCACCTCTGTGCCGGGGATG…	MVKVTSSGFTANPLSHHADSVSPANSPPQLPEPVPLVDLSESSRKGGMRNRPHASLNSQVLGLQAVPSQRGKHVRVRSHADGESVINAWLAKRPSVQSETSLGNDGKLVRYNAVNHEPLAPRNEAFFTSVPGMLMAVLTVHPEMEHGISGDITADAVAARLAEPPIGLLTGVWQSSHDRAYLERGGVVHTANMEERWAPLTLPGMDPREPLRMTGLQADGGVYLHNGSQLWRLTETAAESVTTENLPEGAAVRIGAGGEVHGLHEGALHSNGISRPVELWRPKAGAPGSEQSPARPVDLLPLPGGTAALILDDKGRIYHADLKGTGAVEAHRLKLPADFAQGKGWAVTAMGLSRDETVHLMLQDQNGRRMSLQRAPGEALFRPAYLLDRPLLLLYTEGL…	173	-	53581	53612	CGGAACCGATCTGGCTGTCTGGCCACTCAATC
Pseudomonas syringae	1	PdpICMP5014	PdpICMP5014|ALQ27_04457	Cluster_406.1	Type III Effector	PdpICMP5014_Contig_56	-	4090	8205	4116	1371	CTGAGCCGATGGAGCCCGCTCATGACCTTAAGAATCAATACTCGTTCTGCTACCCCGGTTGTACCTCTGGAAACAGGCTCTTCATCGCAGCCGACACCACCGCCGGTCACGGCAAGACCGACTGAGCCTCCCCCCGTCGCCAATCCTGCTGCGCCTAAATCAGCGCCAGGTGTTCAGCAAGCACACGGGCTGAAGACGCGCATCACTGGCAAGCTTTCCGAACGTCAGACCAATTTCAGTCTTGGAATTCCCGGCACCGGTCGTACTCTCAACCGGCCCCTGCGCAGCGGAATCCCGGAGGAAGGTGAACACCTATCGAGCGAGGAGAGTCATGATCCGTTGCTCAAGGAAGCGCATGAACTGCAGCGCATGGTCGAGTCGGCGCTGACCCATCTGAAA…	MSRWSPLMTLRINTRSATPVVPLETGSSSQPTPPPVTARPTEPPPVANPAAPKSAPGVQQAHGLKTRITGKLSERQTNFSLGIPGTGRTLNRPLRSGIPEEGEHLSSEESHDPLLKEAHELQRMVESALTHLKAAPTSLWERPAPSTVRRITTKVFPWLKPAPLREVASNGSNGSNAKTKADNSKQSPETIAAAVKELGTRLDHQSKVLATATHALVAAREHLESLEQATPPTSTERLDHARARVQQADSTTRLASQQLRELIQGTEVLQLGALSEGQDQVEQKAEFSQQWLGELRTRMQAVDVRFADRHAAIEIELQLKVAETRELISLDHDMTAAEHTAAQANTQLSALRAQRQETPEGSDEADRLDTAIGQTLATRSQAMQTHQQLAKRLVRVDAD…	262	-	8467	8498	CGGAACCGAATCGACATTTCGACCACCCATCC
Pseudomonas syringae	1	PdpICMP5014	PdpICMP5014|ALQ27_100135	Cluster_23960.1	Type III secretion related protein	PdpICMP5014_Contig_156	+	27513	27902	390	129	ATGAAACCTCAGTCACCGGATTTCGCCCGCTTCATCAATTCTCTGGGCGCCCAGCTCGGCACGTCACTGACCTTGCAGAACGGCGTATGCGCTCTTTATGACGGTCAGAACAACGAAGCGGCGATCATTGAATTGCCCGAGCACAGTGAGATGGTCATTTTCCATTGCCGCATCGGCCGTTGCCCGGAGCGTGCCCCCGATTTGCAGCGTCTGTTGAGTCTGAACTTTGACGTGGCGCGCTTGCATGGCTGCTGGTTTGCGGTCGACCAGGGCGATGTCCGTCTATGCGCGCAGCGTGAACTGGCCTCACTCGATGAGCCAGCGTTTTGTGACGTGACGCGCGGGTTCATTTCTCAGGCACGTGAAGCGCGTGTTTTCTTACAGGCTTGA	MKPQSPDFARFINSLGAQLGTSLTLQNGVCALYDGQNNEAAIIELPEHSEMVIFHCRIGRCPERAPDLQRLLSLNFDVARLHGCWFAVDQGDVRLCAQRELASLDEPAFCDVTRGFISQAREARVFLQA	43	+	27439	27470	TGGAACCGACGCGGTCCTGTGACCACACATTG
Pseudomonas syringae	1	PdpICMP5014	PdpICMP5014|ALQ27_100932	Cluster_28714.2	Type III secretion related protein	PdpICMP5014_Contig_130	+	10755	11129	375	124	GTGACCATTTCCCAACTCAGCAATTTGAAAAGTGTATCGCCGGAGCTTGGGCAGAATGCTCATCAGGGGCTCGGCTCCGAACCCGTTCAGGCGGATGTCGACCTATTCAATGCGGCGATGCGCCCTGACAGCGGGCCCGCAGCGTCGCACCTGTCCGACCGGATAGCCAGTGCGCTGTCCGAGCGGCTGGGCAGTACCGAGAAGCTTTCACAGCAAGCATTACGCCAGATGAAGAAAGTGTCGAACACCGAAGATCCTGGAGACATCGTGCAGATGAGTCGGGCGTTGTCGCAGTGCTCGTTGCAAGTGGCGTTGACGACCAAGGTCGTGAGCAAGAGCGCTCAGGCGCTCGACAAGTTGACCAACCTGCAGTAG	MTISQLSNLKSVSPELGQNAHQGLGSEPVQADVDLFNAAMRPDSGPAASHLSDRIASALSERLGSTEKLSQQALRQMKKVSNTEDPGDIVQMSRALSQCSLQVALTTKVVSKSAQALDKLTNLQ	1570	+	9153	9185	TGGAACCGATTCGCAGGCCGCTGCCACCTAGTG
Pseudomonas syringae	1	PdpICMP5014	PdpICMP5014|ALQ27_103463	Cluster_988.1	NA	PdpICMP5014_Contig_86	-	20832	21959	1128	375	GTGTCGGGTCGGTGTTGTGCATTTCCAGCAAGTCTTCACGGACAGCTTTCTGTTTCATCTGCCACTGACGGCGAGCCACTTTGGGTGTTTTTGATAATGTGGGGCATGGATTTGCGAGGGTTTGACAGGATTGCAGCGTGCCTTGTGTTGCTGCTGTGTGGCGGCTGTGGTCAGGAGCGCAAGCTGGAGAGCTTTGGCGGGCCAACCATGGGCAGTCACTATTCCGTGGTGTATGTCCGCGGTGCCGGGCAGCCTGACCCGGCGGTAATGCGCCCGGAGGTCGAAGCCATTCTGGCTGACGTCGATCAACAGATGTCGCTGTGGCGCAGTGACTCGGACATCGAACGTTTCAATGCGTTGCCAGCCAACAGCTGCCAGATCATGTCCACGTCGGTTTTG…	MSGRCCAFPASLHGQLSVSSATDGEPLWVFLIMWGMDLRGFDRIAACLVLLLCGGCGQERKLESFGGPTMGSHYSVVYVRGAGQPDPAVMRPEVEAILADVDQQMSLWRSDSDIERFNALPANSCQIMSTSVLHLIGVGEQLSRESDGAFDLTVKPLLDLWGLGAHALFEQMPLVRQLARTRALVGYRNLRIVGQQLCKNAAVQVDLNSIAAGYAVDRITERMDALGVHDYMVQATGELKVSGLKPDGSPWRVTLEAPSDDGYDAQKMFPLTGHAMSTSGDYRRYRDGNGRHISDTLDALTGSPVNHGLASVTVLHPSALMADGLSSLLLILGPERGWNYAQEHKIPAFFVIRADKRFIIRSNASFDRLAVRSPQ	15	-	21974	22007	TGGGAACCCTGCGCAGGTCATTGACCACTCAGTG
Pseudomonas syringae	1	PdpICMP5014	PdpICMP5014|ALQ27_104418	Cluster_7028.1	NA	PdpICMP5014_Contig_56	-	8223	8333	111	36	GTGCCGCCCTGGCAGTTTGAAGAAGTGTCGCCTTCCGCCGCGACAGCCCTTCGAACACGTTTTACGCACCACCGAATGTGCAGTGTCGATTACTACCACCACCTGTATTGA	MPPWQFEEVSPSAATALRTRFTHHRMCSVDYYHHLY	134	-	8467	8498	CGGAACCGAATCGACATTTCGACCACCCATCC
Pseudomonas syringae	1	PdpICMP529	PdpICMP529|ALO72_00166	Cluster_4528.1	Type III secretion related protein	PdpICMP529_Contig_109	-	2893	4140	1248	415	ATGAGCATCGGCATCACACCCCGGCCGCAACAGACCACCACGCCACTCGATTTTTCGGCGCTAAGCGGAAAGAGTCCTCAACCAAACACGTTCGGCGAGCAGAACACTCAGCAAGCGATCGACCCGAGTGCACTGTTGTTCGGCAGCGACACACAGAAAGACGTCAACTTCGGCACGCCCGACAGCACCGTCCAGAATCCGCAGGACGCCAGCAAGCCCAACGACAGCCAGTCCAACATCGCTAAATTGATCAGTGCATTGATCATGTCGTTGCTGCAGATGCTCACCAACTCCAATAAAAAGCAGGACACCAATCAGGAACAGCCTGATAGCCAGGCTCCTTTCCAGAACAACGGCGGGCTCGGTACACCGTCGGCCGATAGCGGGGGCGGCGGTACG…	MSIGITPRPQQTTTPLDFSALSGKSPQPNTFGEQNTQQAIDPSALLFGSDTQKDVNFGTPDSTVQNPQDASKPNDSQSNIAKLISALIMSLLQMLTNSNKKQDTNQEQPDSQAPFQNNGGLGTPSADSGGGGTPDATGGGGGGGDTPSATGGGGGGGDTPTATGGGSGGGTPTATGGGEGGVTPQITPQLANPGRTSGTGSVSDTAGSTEQAGKINVVRDTIKVGAGEVFDGHGATYTADKSMGNGDQSENQKSMFELAEGATLKNVNLGENEVDGIHVKAKNAQEVTIDNVHAQNVGEDMITVKGEGGAAVTNLNIKNSSAKGADDKVVQLNANTHLKIDGFKADEFGTLVRPNGKTNFSDMSIELNDVEANHGKFALVKSDSENLKLTTSNIAMTDV…	122	-	4262	4292	GGGAACCGGTCGCTGCGCTTTGCCACTCACT
Pseudomonas syringae	1	PdpICMP529	PdpICMP529|ALO72_00167	Cluster_3390.2	Type III secretion related protein	PdpICMP529_Contig_109	+	4443	4937	495	164	ATGACCAACAATGACCAGTACCACACCCTTATCAACGAAATCTGCGCACTCAGCCTGATTTCCACACCTGAACGTTTCTATGAATCTGCCAATTTCAAAATCAGCGAAGTGGACTTCACCCTTCAGTTTCAAGACCGCGACGAAGGCCGTGCCGTTCTGATCTACGGTGACATGGGCGCGTTGCCCGCGCGCGGCCGTGAGAGCGCGTTGCTGGCGTTGATGGACATCAACTTTCACATGTTCGCGGGCGCCCATAGCCCGGCATTTTCCTTTAATGCGCAGACCGGTCGTGTGCTGCTGATGGGCTCTGTGGCCCTTGAACGAGCCTCTGCCGAAGGCGTGCTGTTGTTGATGAAGTCGTTTTCCGACCTGGCCAAAGAGTGGCGCGAGCATGGGTTC…	MTNNDQYHTLINEICALSLISTPERFYESANFKISEVDFTLQFQDRDEGRAVLIYGDMGALPARGRESALLALMDINFHMFAGAHSPAFSFNAQTGRVLLMGSVALERASAEGVLLLMKSFSDLAKEWREHGFMGQATTAGASTDQPVAPAAKRESLSAPGRFQ	57	+	4354	4386	AGGAACTGAAATGCCTATGCCTGCGACTCAGTG
Pseudomonas syringae	1	PdpICMP529	PdpICMP529|ALO72_00169	Cluster_23960.1	Type III secretion related protein	PdpICMP529_Contig_109	+	7236	7625	390	129	ATGAAACCTCAGTCACCGGATTTCGCCCGCTTCATCAATTCTCTGGGCGCCCAGCTCGGCACGTCACTGACCTTGCAGAACGGCGTATGCGCTCTTTATGACGGTCAGAACAACGAAGCGGCGATCATTGAATTGCCCGAGCACAGTGAGATGGTCATTTTCCATTGCCGCATCGGCCGTTGCCCGGAGCGTGCCCCCGATTTGCAGCGTCTGTTGAGTCTGAACTTTGACGTGGCGCGCTTGCATGGCTGCTGGTTTGCGGTCGACCAGGGCGATGTCCGTCTATGCGCGCAGCGTGAACTGGCCTCACTCGATGAGCCAGCGTTTTGTGACGTGACGCGCGGGTTCATTTCTCAGGCACGTGAAGCGCGTGTTTTCTTACAGGCTTGA	MKPQSPDFARFINSLGAQLGTSLTLQNGVCALYDGQNNEAAIIELPEHSEMVIFHCRIGRCPERAPDLQRLLSLNFDVARLHGCWFAVDQGDVRLCAQRELASLDEPAFCDVTRGFISQAREARVFLQA	43	+	7162	7193	TGGAACCGACGCGGTCCTGTGACCACACATTG
Pseudomonas syringae	1	PdpICMP529	PdpICMP529|ALO72_02120	Cluster_8989.1	metabolic process	PdpICMP529_Contig_284	+	7450	9345	1896	631	ATGCCCACGACGTTCAAAGAGATCCCCCGCGAGCGCCCGGTCACGCCGTTGCTCGACCAGGCTGACACCCCACACGGCCTACGCCGTTTGGGTGAAGCCGAGCTCGAAACCCTGGCCGATGAACTGCGCCTGGAGCTGCTGTACTCCGTTGGCCAGACCGGAGGGCATTTCGGTGCCGGTCTTGGGGTCATCGAGCTGACCATCGCGCTGCATTACGTGTTTGATACCCCGGACGACCGTCTGGTGTGGGATGTGGGTCATCAAGCCTATCCGCACAAGATTCTCACCGGCCGTCGCGCGCGCATGTCCACCCTGCGCCAGAAGGACGGTGTTGCCGCCTTTCCGCGCCGCAGCGAGAGCGAGTACGACACGTTTGGCGTTGGCCACTCCAGCACCTCG…	MPTTFKEIPRERPVTPLLDQADTPHGLRRLGEAELETLADELRLELLYSVGQTGGHFGAGLGVIELTIALHYVFDTPDDRLVWDVGHQAYPHKILTGRRARMSTLRQKDGVAAFPRRSESEYDTFGVGHSSTSISAALGMAIASRLQGSERKSIAVIGDGALTAGMAFEALNHAPEVAANMLVILNDNDMSISRNVGGLSNYLAKILSSRTYTSMREGSKKVLSRLPGAWEIARRTEEYAKGMLVPGTLFEELGWNYIGPIDGHDLPTLIATLRNMRDLKGPQFLHVVTKKGKGFAPAEVDPIGYHAITKLEPLNAPVSVQKKVSSPKYSGVFGQWICDMAEVDSRLVGITPAMKEGSDLVDFSERFPERYFDVAIAEQHAVTLAAGMACEGSKPVVAI…	386	+	9731	9775	GAAGCCGTTCGGTGCCTACAAACGCGCATTGGCGGCCACTCAGGC
Pseudomonas syringae	1	PdpICMP529	PdpICMP529|ALO72_02280	Cluster_13565.1	Type III Effector	PdpICMP529_Contig_305	+	3147	4373	1227	408	ATGAATATCTCAGGTCTGAACAGACGTCAGGGTACTCAGGCGGAGAATACTGAAGGCGCCTCTTCATCGGTAAATACTCCGCAGCCACAACGTGGTGCAGGTAGACGCCTGCAGCGCCAGGACGCGCTGCCGACGGATACCCGATACAGCGCCAGCCGGACATCAGCTTCGCCGCAAAGCGCGCGCGCGGCGGGAAGATATGAAGCGGGGGGCAGTTCTTCTGGCACGCAGGATACTCAGCAAGCTGAGGGTTCAATGCCTTCGTCGTCCCCCCTCCTACAATTTCGCCTAGGCGGCGGGCGGAACCATTCTGAGCTGGAAAATTTTCATAAAATGATGCTTGACTCACCGAAAGCATCACGGGGAGATGCTATACCGGAGCAGCCCGAAGCAATACCT…	MNISGLNRRQGTQAENTEGASSSVNTPQPQRGAGRRLQRQDALPTDTRYSASRTSASPQSARAAGRYEAGGSSSGTQDTQQAEGSMPSSSPLLQFRLGGGRNHSELENFHKMMLDSPKASRGDAIPEQPEAIPKRLLEKMEGINLPQLALRNKDLHEHAVMVCDQVKNGSGSNKDIIFGDIKMLPLFADVENSRNPGLNLHTFKTNKDFYKAIKEQNKYVQKNKQSLSMRVVYPPLKGMYTHHIALDIQLRHGHRPSIVGFESNPGNLIKLAERDILSALGNVKLNMVGNLIQNSKTDCVMFALNNALKAFKHHDEYTARLHNGEEKVPIPATFLKHAQSKSLVENHPEKDTTVTKDKGGLHAETLLHRNRAYRAKRFAGQHVTSIEGFRMQEIKRAGE…	599	+	2516	2548	TGGAACCAATTGAAAGCCTTTGACCACCCAGCT
Pseudomonas syringae	1	PdpICMP529	PdpICMP529|ALO72_02321	Cluster_2089.1	Type III secretion related protein	PdpICMP529_Contig_31	-	31601	31993	393	130	ATGAACTCATCACTCACCCTGCAAAAGCTGCTTGATAGGCGTGGTCAGGCGGCCAACGGAAATTCTGCAACGGAGGCCGTACAGTGGCAGGAAGGAATGAACCTGACGCTGCATGTAAGCGGCGATAGCCTCACGATGCTGGCCGAAATCATCGATCTGCGTGCCGACCCTCAGGACGACATCCTCTTGCGCAAGCTGCTTGCCCATGCTTTTCCCGGCCTGCGGCTACGACGCGGCGCGTTGACCATCAACCCGGACGAGAACACGTTGGTGTACTCCTACGAGCATGACTTTCTCACGCTGGACAAGGCCCGATTCGAAAATCTGCTGGCTAATTTTGCCGAAACAACGCAGGAGTTGCGTAACACCGCGCAGCGCCTGCGTTACCGCTGA	MNSSLTLQKLLDRRGQAANGNSATEAVQWQEGMNLTLHVSGDSLTMLAEIIDLRADPQDDILLRKLLAHAFPGLRLRRGALTINPDENTLVYSYEHDFLTLDKARFENLLANFAETTQELRNTAQRLRYR	29	-	32022	32054	GGGAACCACCGCGTGGGTTCCAGCCACTCACCG
Pseudomonas syringae	1	PdpICMP529	PdpICMP529|ALO72_02857	Cluster_4852.1	Type III secretion related protein	PdpICMP529_Contig_43	+	40149	41255	1107	368	ATGAAAATCGTCGCTCCGCCTATCATGCGAATACTTCCGGTCGCGCCGACCCGCGTCGTGACGCCTGCTGCGCAGCCACTTCCCAATGCTGATCTGCACAATTCAGGGACTTCGCCACAACAGGTTTCGCGCTTCGCGGCCGCGCTCATCCAGCACAGACGCATCCTCATTCAGCGCGACCTGATCGCCAGCAACAATGCCTTGCAGTCGCGAGCGGTGAAGCTCGGTGAGCTTTATCAACTGCTGATGACCGATCAGGACACCGGGCTGGATAACGCGGCCAGGGTATTGCGCAAAAAGCTCATGCAGGACGACTCGTCCTCAGATCTGAAACAGGTTCTGGATTACACCGACGGTGATGCCGCCAAGGCTCATGTGGTGTTGCAAGCCGCCAGAAAG…	MKIVAPPIMRILPVAPTRVVTPAAQPLPNADLHNSGTSPQQVSRFAAALIQHRRILIQRDLIASNNALQSRAVKLGELYQLLMTDQDTGLDNAARVLRKKLMQDDSSSDLKQVLDYTDGDAAKAHVVLQAARKQAEADGEMGEHVVLTQQLKQLRRKYGPRARAGINSAKAFARPNIDNKRRVALRNLYSVAVSGQPNITGLIEALLGEQQEAGQFNIDLRDMRTAIADDLSAMTPSASHEQLRTLMHGLNTARHVTTLLKGCEHLLGRMRNKNPDLTVDPPAFLKHLLTLTANGMNVNQTLQLTQHIGGKQLKHQLAFLNGLRPMLLQLPILLWRDMKSRQTALSNLLILMAELTTQEQKQLYGGLV	27	+	40090	40122	GGGAACTGATCCGGGACCGTGACCCACTCAGCG
Pseudomonas syringae	1	PdpICMP529	PdpICMP529|ALO72_02860	Cluster_3403.1	Type III secretion related protein	PdpICMP529_Contig_43	+	46170	46739	570	189	ATGACCGCACCGATCAAAACCCCGGCCAAAGCGCCACCAGCCCCCCAGCGCTCTGCGCCTGTCGAGCGGCCAGCCACAACTCTCAGTGAAAAACCATTCGGTGAAAAACGCCCTGCATTCGGCGGCTTGGGCCGTGGTGATGTACAGAACAGCCGTTCGGCACTGAGCAAGGCGCTGCAAGACACCCCGGTGAGTGCCGACGGCATGTTCTTTTCGCAACTGCTGGTGCCGCCCGTCAGTGCCGAACCTGATCAGCAAGGCTTTGGCGGTGGCGGTATAGCCTTTCCGGTGCGCGCAGAACAAGTGCCGACCCAACTGATCGACGAGCTGGCGCAGCGCCTGCCGGATCAGCCTGACGGTCCCCTCAGTTTCACCCTGCTGATGCCCAACCTGGGCAGC…	MTAPIKTPAKAPPAPQRSAPVERPATTLSEKPFGEKRPAFGGLGRGDVQNSRSALSKALQDTPVSADGMFFSQLLVPPVSAEPDQQGFGGGGIAFPVRAEQVPTQLIDELAQRLPDQPDGPLSFTLLMPNLGSVRVNANKTENRWSVQLGFARRDVLKRLSAHTGACRDSLSQALGQDVELDMHEDLSA	301	+	45838	45869	TGGAACTGAAATCAATGCTCGACCACTTATCA
Pseudomonas syringae	1	PdpICMP529	PdpICMP529|ALO72_02869	Cluster_49085.1	Type III secretion related protein	PdpICMP529_Contig_43	-	54460	54684	225	74	ATGATCAGTTTCAACAGCTTGCAACGCCATCTCGACAACTCGGTGAGCCGCGCTCACACCAACATGGACCAGGCCGCGATGGAAGCCTCCGAGAGTGGCAACGTCGAAGACCTGCAGGCATTCAACGATGCCCAGCAGCAGGTCGATGTCGCCGGTATTGCTGTCAACGAATGCCTGCGTGCCAAGCACGGTATCAATAAAGAAGTCATCGATGGAATTCAGTGA	MISFNSLQRHLDNSVSRAHTNMDQAAMEASESGNVEDLQAFNDAQQQVDVAGIAVNECLRAKHGINKEVIDGIQ	30	-	54714	54746	TGGAACCGCTCGGCGGGTTTGCTCCACTCAAGG
Pseudomonas syringae	1	PdpICMP529	PdpICMP529|ALO72_03377	Cluster_4422.1	Type III secretion related protein	PdpICMP529_Contig_7	-	13223	14197	975	324	ATGACTATGGGTGTTTCACCTATTCGTAACTCAAATTCCCTACCCATCGATTTTTCGTCATTGAGCGCAAAGAGTGGCGGGTATAACGGGCTGGGGAGTGGAGGCAATTCGACTATCGACCCGAGTACGTTGTTATTTGGCAATCAAGGGCAGACGCAGGTCAATTTCGCTCCGCCCAACAGCACGGACTCGTCAACCAGCGGTGTGAACGCTGCGTCAGGCAATACGGCGTCCGGCCTGGTCGAGCAAATCATGAGCCTGCTGAAACAATTGATGCAGATGCTGATGCAAAACAACAATGCTTCCGGTAACCCTCAGGCTGATTCGTCAACGCCAGGCGTCGGCAGTGGCAACAGCGTCGGCGGCGGCGATACGGGAAGCAGTCTCGCAAGCGGCGAC…	MTMGVSPIRNSNSLPIDFSSLSAKSGGYNGLGSGGNSTIDPSTLLFGNQGQTQVNFAPPNSTDSSTSGVNAASGNTASGLVEQIMSLLKQLMQMLMQNNNASGNPQADSSTPGVGSGNSVGGGDTGSSLASGDGGDETSGVGNGGLGDAGSTPTTSAADGVPSDTSLTGSGGLHLPQQLEQYRGDIMDAAKATGVPPSVIAGQIWAESRGQLNAATTNVNGKADAGLMQVNADTFKSLQQQNPGLLGNDVNDSHTNIMAGALYLRDQNKEFGDMGAALRAYNSGPDKVNKADLSDTGGVGGSSYPADVLNFAKIIESGQGNLPA	88	-	14285	14316	GGGAACCGAGTCATTCAGTGAACCACTCAGTT
Pseudomonas syringae	1	PdpICMP529	PdpICMP529|ALO72_03632	Cluster_6364.1	Type III Effector	PdpICMP529_Contig_80	+	13926	15068	1143	380	ATGAACCCCATTCAGTCACGCTTCTCCAGTGTGCAAGAGCTCAGACGATCCAACGTTGATATTCCGGCGCTCAAAGCCAATGGCCAACTGGAGGTCGACGGCAAGAGGTACGAGATACGTGCAGCCGATGACGGAACAATCTCGGTCCTTCGACCGGAACAACAATCCAAAGCGAAAGGTTTTTTCAAAGGCGCTTCCCAGTTGATAGGTGGCAGCAGCCAGCGCGCGCAGATTGCCCAGGCGCTCAACGAGAAGGTCGCATCGGCACGCACTGTCTTGCACCAGAGCGCTATGACGGGCGGACGCTTTGACACCCTTGAGCGGGGCGAAAGCAGCTCAGCCACAACAGCCATCAAACCCACTGCCAACCAGGCTGCGCAAAGTACTTTTAACAGCTTT…	MNPIQSRFSSVQELRRSNVDIPALKANGQLEVDGKRYEIRAADDGTISVLRPEQQSKAKGFFKGASQLIGGSSQRAQIAQALNEKVASARTVLHQSAMTGGRFDTLERGESSSATTAIKPTANQAAQSTFNSFHEWAKQAEAMQNPSRMDIYKIYKQDAPHSHPMSDEQQEEFLHTLKELNGKKGIEVRTQDHDNVRNKKDRNLDKYIAESPNAKKFFYRITPKHERREDKHQGRLTIGVQPQYAAQLTRAMATLIEKESAITQGKVIGPAYHGQMTDSAVLYINGDVAKAEKLGEKLKQMSGIPLDAFVEHTPLSMQSLSKGLSYAESILGDTRGHGMSRAEVISDALRMDGMPFLARLKLSLSANGYDPDNPALRNTK	455	+	13439	13471	TGGAACCGCCTCGAGCAGAGGCTCCACTCATTG
Pseudomonas syringae	1	PdpICMP529	PdpICMP529|ALO72_04584	Cluster_2089.2	Type III Effector	PdpICMP529_Contig_31	-	30318	31604	1287	428	CTGAGGACTGAGCCTGTGTTGAACAAGCCGACGTTGAACGGGATTGCCTCTACCGCACAAGCCGCTGCTTCCCATGCCGTCGAGGGCCCCATAAGCCCCGCGCCGATGCGACTGGATGCAGCGCAAGGTCAGCGACCACTGCCACCGATGGACGCGCCATCGTCGCTGCGCTTGCGAGCATCAGCCGCACCTACCGGTGAGGAGACGCACGCGAGTACGGCAACATCCGGCAGCACGGCAACGGATGAAGCTGCCCCGGCGCCTGCTCGACAAGCATCGACTATCAATCCGATCAAGCTTTTTGCTCAGATGATGGTGGGCGTTCTTTCCTTGACTGCCGGATACCGTGCGGCGAGATTTCCAGGAGACTTTGCGAAAGATCCGGGCGGCAGTTTATGG…	MRTEPVLNKPTLNGIASTAQAAASHAVEGPISPAPMRLDAAQGQRPLPPMDAPSSLRLRASAAPTGEETHASTATSGSTATDEAAPAPARQASTINPIKLFAQMMVGVLSLTAGYRAARFPGDFAKDPGGSLWAAINLDHRSSPADLTQGNHTVLERYGAYIPKDSGCFKAKADVTHDIPSGVAGQWNFKTRQVKLNPNIALGRHPAEVAGHEFIHCYTHPEFRDRHINHPHWKALNEGLTTHLTEKLPEPKRLLPIALDKDPYHGFKLTTGDSWPDAAKRIEGAVGEDTLLKAFFGGDDDAISEVAKAAAQIYPRLASSRTEQELYRAGMMRGSQQLAECYAGALLASGQPLPESWSRNMLPVFSFSDMQPEQAKKAQLQAEQSHERMGIIFDAAFFS…	418	-	32022	32054	GGGAACCACCGCGTGGGTTCCAGCCACTCACCG
Pseudomonas syringae	1	PdpICMP529	PdpICMP529|ALO72_04633	Cluster_406.1	Type III Effector	PdpICMP529_Contig_346	-	4355	8470	4116	1371	CTGAGCCGATGGAGCCCGCTCATGACCTTAAGAATCAATACTCGTTCTGCTACCCCGGTTGTACCTCTGGAAACAGGCTCTTCATCGCAGCCGACACCACCGCCGGTCACGGCAAGACCGACTGAGCCTCCCCCCGTCGCCAATCCTGCTGCGCCTAAATCAGCGCCAGGTGTTCAGCAAGCACACGGGCTGAAGACGCGCATCACTGGCAAGCTTTCCGAACGTCAGACCAATTTCAGTCTTGGAATTCCCGGCACCGGTCGTACTCTCAACCGGCCCCTGCGCAGCGGAATCCCGGAGGAAGGTGAACACCTATCGAGCGAGGAGAGTCATGATCCGTTGCTCAAGGAAGCGCATGAACTGCAGCGCATGGTCGAGTCGGCGCTGACCCATCTGAAA…	MSRWSPLMTLRINTRSATPVVPLETGSSSQPTPPPVTARPTEPPPVANPAAPKSAPGVQQAHGLKTRITGKLSERQTNFSLGIPGTGRTLNRPLRSGIPEEGEHLSSEESHDPLLKEAHELQRMVESALTHLKAAPTSLWERPAPSTVRRITTKVFPWLKPAPLREVASNGSNGSNAKTKADNSKQSPETIAAAVKELGTRLDHQSKVLATATHALVAAREHLESLEQATPPTSTERLDHARARVQQADSTTRLASQQLRELIQGTEVLQLGALSEGQDQVEQKAEFSQQWLGELRTRMQAVDVRFADRHAAIEIELQLKVAETRELISLDHDMTAAEHTAAQANTQLSALRAQRQETPEGSDEADRLDTAIGQTLATRSQAMQTHQQLAKRLVRVDAD…	262	-	8732	8763	CGGAACCGAATCGACATTTCGACCACCCATCC
Pseudomonas syringae	1	PdpICMP529	PdpICMP529|ALO72_04748	Cluster_2413.3	Type III secretion related protein	PdpICMP529_Contig_47	-	126	656	531	176	ATGATGAGCCTTTCTGCCGAGGATCACTGGGTTCACTGGTGGTGCAACCCCTGGCAGTGGGCACATTCGGAGTGGCACGACCGATTCGCCAACGCTCGTGGGTTATCGGTCAGCGACTGCGATGCGCTTATGGCCAGCCGTCATGGCGTGTTTCTGCAGAGTCTGGGCATCGACCCGGTTCAGCCGCCAGCGCCCGCGGAACCGGTGCTGCGCTGGTTGGCGCTGACGCCCTCGCAGCGTGAGCAGGCGCTAAGCCTGGCGCAGTGCATCTGCTTCTCCCGTAACGAAAGCGACGGCCCTGACGGTCAATGGTGCTGGGGGTTGACCAAAGCGCTGCGCCCCGGTGTCTGGCTGGAGTTTGAACACGAGGACGCACGCCTGCTGCTGGGCGCCTGGCTT…	MMSLSAEDHWVHWWCNPWQWAHSEWHDRFANARGLSVSDCDALMASRHGVFLQSLGIDPVQPPAPAEPVLRWLALTPSQREQALSLAQCICFSRNESDGPDGQWCWGLTKALRPGVWLEFEHEDARLLLGAWLGPQYWSRLRLEWPPNEVPDTPGKAPENKLQALWQAIMWRVTAA	2756	-	3412	3444	TGGAACCGATTCGCAGGCCGCTGCCACCTAGTG
Pseudomonas syringae	1	PdpICMP529	PdpICMP529|ALO72_100591	Cluster_4702.2	Type III secretion related protein	PdpICMP529_Contig_47	-	1870	2970	1101	366	ATGCAAGCACTTAACAGCATCAGTTCGTTGCAAACCTCTGCATCATTGTTCCCCGTGTCGCTCAACAGCGATGTGAGCGCCAACACCAGCACTTCCAGCAAAGAGCTCAAGGCTGTGATCGATCAGCTGGTTCAGGCGCTGACCCAAAGTGGGCAGCTCGATGAAACCTCACCGCTCGGCAAAATGCTCGCCAAGGCCATGGCCGCGGATGGCAAGTCGGCTAACAGCATCGATGACATCACTGCATCGCTCGACAAGCTGATCCACGAAAAGCTCGGCGACAATTTCGGTGCCTCTGCCGGCATCGGCGCGGGTGGCGTTGGCGGGGCGGGTTCTGGTTCAGGTGTCGGCGGCGGTCTGAGCAGCGACGCGGGCGCCGGGCAATCCGATCTGATGAGT…	MQALNSISSLQTSASLFPVSLNSDVSANTSTSSKELKAVIDQLVQALTQSGQLDETSPLGKMLAKAMAADGKSANSIDDITASLDKLIHEKLGDNFGASAGIGAGGVGGAGSGSGVGGGLSSDAGAGQSDLMSQVLNGLGKAVLDDLLTPSGEGGTTFSSDDMPTLEKVAQFMDDNKAQFPTRDGGSWMNELKEDNGLDAQETAQFRSALDVIGQQLGQQQGDASGVTSGGGLGSPVSDSSLGNPAIDANTGPAANGNGSVDVGQLIGQLIDRGLQSVSSGGGLGTPVDNSTQPAGGTPAANPTGNVSNQDLGQLLSGLLQRGLEATLQDAGNTGADLQSSAAQVAAQLINALLQGTNNQTNQAVA	442	-	3412	3444	TGGAACCGATTCGCAGGCCGCTGCCACCTAGTG
Pseudomonas syringae	1	PdpICMP529	PdpICMP529|ALO72_100756	Cluster_28714.2	Type III secretion related protein	PdpICMP529_Contig_47	-	1468	1842	375	124	GTGACCATTTCCCAACTCAGCAATTTGAAAAGTGTATCGCCGGAGCTTGGGCAGAATGCTCATCAGGGGCTCGGCTCCGAACCCGTTCAGGCGGATGTCGACCTATTCAATGCGGCGATGCGCCCTGACAGCGGGCCCGCAGCGTCGCACCTGTCCGACCGGATAGCCAGTGCGCTGTCCGAGCGGCTGGGCAGTACCGAGAAGCTTTCACAGCAAGCATTACGCCAGATGAAGAAAGTGTCGAACACCGAAGATCCTGGAGACATCGTGCAGATGAGTCGGGCGTTGTCGCAGTGCTCGTTGCAAGTGGCGTTGACGACCAAGGTCGTGAGCAAGAGCGCTCAGGCGCTCGACAAGTTGACCAACCTGCAGTAG	MTISQLSNLKSVSPELGQNAHQGLGSEPVQADVDLFNAAMRPDSGPAASHLSDRIASALSERLGSTEKLSQQALRQMKKVSNTEDPGDIVQMSRALSQCSLQVALTTKVVSKSAQALDKLTNLQ	1570	-	3412	3444	TGGAACCGATTCGCAGGCCGCTGCCACCTAGTG
Pseudomonas syringae	1	Pla302278PT	Pla302278PT|PLA106_04042	Cluster_3032.1	NA	AEAM01000086	-	1463	1579	117	39	ATGGCCCCTGCCGCAAACGAATCCGTATCGCTGGGCGGCCTCTGCGGCGGCCTCTGCGGCGGCCTCGATGGCGGCACGCTGGTCAGCTGCACTCTGGGCACTACCAGCGTCTGCTGA	MAPAANESVSLGGLCGGLCGGLDGGTLVSCTLGTTSVC*	581	-	2160	2190	TGGAACCGATTTCGATGAGTCGCCACACATA
Pseudomonas syringae	1	Pla302278PT	Pla302278PT|PLA106_04062	Cluster_4852.1	Type III secretion related protein	AEAM01000087	+	4819	5925	1107	369	ATGAAAATCGTCGCTCCGCCTATCATGCGAATACTTCCGGTCGCGCCGACCCGCGTCGTGACGCCTGCTGCGCAGCCACTTCCCAATGCTGATCTGCACAATTCAGGGACTTCGCCACAACAGGTTTCGCGCTTCGCGGCCGCGCTCATCCAGCACAGACGCATCCTCATTCAGCGCGACCTGATCGCCAGCAACAATGCCTTGCAGTCGCGAGCGGTGAAGCTCGGTGAGCTTTATCAACTGCTGATGACCGATCAGGACACCGGGCTGGATAACGCGGCCAGGGTATTGCGCAAAAAGCTCATGCAGGATGACTCTTCCTCAGATCTGAAACAGGTTCTGGATTACACCGACGGTGATGCCGCCAAGGCTCATGTGGTGTTGCAAGCCGCCAGGAAG…	MKIVAPPIMRILPVAPTRVVTPAAQPLPNADLHNSGTSPQQVSRFAAALIQHRRILIQRDLIASNNALQSRAVKLGELYQLLMTDQDTGLDNAARVLRKKLMQDDSSSDLKQVLDYTDGDAAKAHVVLQAARKQAEADGEMGEHVVLTQQLKQLRRKYGPRARAGINSAKAFARPNIDNKRRVALRNLYSVAVSGQPNITGLIEALLGEQQEAGQFNIDLRDMRTAIADDLSAMTPSASHEQLRTLMHGLNTARHVTTLLKGCEHLLGRMRNKNPDLTVDPPAFLKHLLTLTANGMNVNQTLQLTQHIGGKQLKHQLAFLNGLRPMLLQLPILLWRDMKSRQTALSNLLILMAELTTQEQKQLYGGLV*	27	+	4760	4792	GGGAACTGATCCGGGACCGTGACCCACTCAGCG
Pseudomonas syringae	1	Pla302278PT	Pla302278PT|PLA106_04087	Cluster_3403.1	Type III secretion related protein	AEAM01000087	+	10840	11409	570	190	ATGACCGCACCGATCAAAACCCCGGCCAAAGCGCCACCAGCACCCCAGCGCCCTGCGCCTGTCGAGCGGCCAGCCACAGCTCTTAGCGAAAAACCATTCGGTGAAAAACGCCCTGCATCCGGTGGCCTGGGCCGTGGCGATGTACAGACCAGCCGTTCGGTACTGAGCAAGTCGCTGCAAGACACCCCGATGAGTGCCGACGGCATGTTCTTTTCGCAACTGCTGGTGCCGCCCGTAAGTGCCGAACCTGGTCAGCAAGGCTTTGGCGGGGGCGGTATAGCCTTTCCGGTACGCGCAGAACAAGTGCCGACCCAACTGATCGACGAGCTGGCGCAGCGCCTGCCGGATCAGCCTGACGGCCCCCTCAGTTTCACCCTGCTGATGCCCAACCTGGGCAGC…	MTAPIKTPAKAPPAPQRPAPVERPATALSEKPFGEKRPASGGLGRGDVQTSRSVLSKSLQDTPMSADGMFFSQLLVPPVSAEPGQQGFGGGGIAFPVRAEQVPTQLIDELAQRLPDQPDGPLSFTLLMPNLGSVRVNANKTENRWSVQLGFARRDVLKRLSAHTGACRDSLSQALGQDVELDMHEDLSA*	6048	+	4760	4792	GGGAACTGATCCGGGACCGTGACCCACTCAGCG
Pseudomonas syringae	1	Pla302278PT	Pla302278PT|PLA106_04137	Cluster_49085.1	Type III secretion related protein	AEAM01000088	-	3227	3451	225	75	ATGATCAGTTTCAACAGCTTGCAACGCCATCTCGACAACTCGGTGAGCCGTGCTCACACCAACATGGACCAGGCAGCGATGGAAGCCTCCGAGAGTGGCACCGTCGAAGACCTGCAGGCATTCAACGATGCCCAGCAGCAGGTCGATGTCGCCGGTATTGCCGTCAATGAATGCCTGCGTGCCAAGCACGGTATCAATAAAGCAGTCATCGATGGAATTCAGTGA	MISFNSLQRHLDNSVSRAHTNMDQAAMEASESGTVEDLQAFNDAQQQVDVAGIAVNECLRAKHGINKAVIDGIQ*	30	-	3481	3513	TGGAACCGCTCGGCGGGTTTGCTCCACTCAAGG
Pseudomonas syringae	1	Pla302278PT	Pla302278PT|PLA106_04147	Cluster_2413.3	Type III secretion related protein	AEAM01000088	-	4163	4690	528	176	ATGAGCCTTTCTGCCGAGGATCACTGGATTCACTGGTGGTGCAACCCCTGGCAGTGGGCACATTCGGAGTGGCATGACCGATTCGCCAACGCTCGTGGGTTATCGGTCAGTGACTGCGATGCGCTCATGGCCAGCCGTCATGGCGTGTTTCTGCAGAGTCTGGGCATTGACCCGGCTCAGCCGCCAGCGCCCGCGGAACCGGTGCTGCGCTGGTTGGCGCTGACGCCCTCGCAGCGTGAGCAGGCGCTAAGCCTGGCGCAGTGCATCTGCTTCTCCCGTAACGAAAGCGACGGCCCTGACGGTCAATGGTGCTGGGGGTTGACCAAAGCGCTGCGCCCCGGTGTCTGGCTGGAGTTTGAACACGAGGACGCGCGTCTTCTGCTGGGCGCCTGGCTTGGG…	MSLSAEDHWIHWWCNPWQWAHSEWHDRFANARGLSVSDCDALMASRHGVFLQSLGIDPAQPPAPAEPVLRWLALTPSQREQALSLAQCICFSRNESDGPDGQWCWGLTKALRPGVWLEFEHEDARLLLGAWLGPQYWSRLCLEWPPNEVPDTPGKAPENKLQALWQAIMWRVTAA*	2771	-	7461	7493	TGGAACCGATTCGCAGGCTGCTGCCACCTAGTG
Pseudomonas syringae	1	Pla302278PT	Pla302278PT|PLA106_04157	Cluster_28714.2	Type III secretion related protein	AEAM01000088	-	5505	5879	375	125	GTGACCATTTCCCAACTCAGCAATTTGAAAAGTGTATCGCCGGAGCTTGGGCAGAATGCTCATCAGGGGCTCGGCTCCGAACCCGTTCAGGCGGATGTCGACCTATTCAATGCGGCGATGCGCCCTGACAGCGGGCCAGCAGCGTCGCACCTGTCCGACCGGATAGCCAGTGCGCTGTCCGAGCGGCTGGGCAGTACCGAGAAGCTTTCACAGCAAGCATTACGCCAGATGAAGAAAGTGTCGAACACCGAAGATCCTGGAGACATCGTGCAGATGAGTCGGGCGTTGTCGCAGTGCTCGTTGCAAATGGCGTTGACGACCAAGGTCGTGAGCAAGAGCGCTCAGGCGCTCGACAAGTTGACCAACCTGCAGTAG	VTISQLSNLKSVSPELGQNAHQGLGSEPVQADVDLFNAAMRPDSGPAASHLSDRIASALSERLGSTEKLSQQALRQMKKVSNTEDPGDIVQMSRALSQCSLQMALTTKVVSKSAQALDKLTNLQ*	1582	-	7461	7493	TGGAACCGATTCGCAGGCTGCTGCCACCTAGTG
Pseudomonas syringae	1	Pla302278PT	Pla302278PT|PLA106_04162	Cluster_4702.2	Type III secretion related protein	AEAM01000088	-	5907	7019	1113	371	ATGCAAGCACTTAACAGCATCAGTTCGTTGCAAACCTCTGCATCATTGTTCCCCGTGTCGCTCAACAGCGATGTGAGCGCCAACACCAGCACTTCCAGCAAAGAGCTCAAGGCTGTGATCGATCAGCTGGTTCAGGCGCTGACCCAAAGTGGGCAGCTCGATGAAACCTCACCGCTCGGCAAAATGCTCGCCAAGGCCATGGCTGCGGATGGCAAGTCGGCTAACAGCATCGATGACATCACTGCATCGCTCGACAAGCTGATCCACGAAAAGCTCGGCGACAATTTCGGTGCCTCTGCCGGCATCGGCGCGGGTGGCGGTGGCGGTGGCATTGGCGGGGCGGGTTCTGGTTCGGGTGTCGGTGGCGGTCTGAGCAGCGACGCGGGTGCCGGGCAATCC…	MQALNSISSLQTSASLFPVSLNSDVSANTSTSSKELKAVIDQLVQALTQSGQLDETSPLGKMLAKAMAADGKSANSIDDITASLDKLIHEKLGDNFGASAGIGAGGGGGGIGGAGSGSGVGGGLSSDAGAGQSDLMSQVLNGLGKAVLDDLLTPSGEGGTTFSSDDMPTLEKVAQFMDDNKAQFPTRDGGSWMNELKEDNGLDAQETAQFRSALDVIGQQLGQQQGDASGVTSGGGLGSPVSDSSLGNPAIDANTGPAANGNASVDVGQLIGQLIDRGLQSVSSGGGLGTPVDNSTQPTGGTPAANPTGNVSNQDLGQLLSGLLQRGLEATLQDAGNTGADLQSSAAQVAAQLINALLQGTNNQTNQAVA*	442	-	7461	7493	TGGAACCGATTCGCAGGCTGCTGCCACCTAGTG
Pseudomonas syringae	1	Pla302278PT	Pla302278PT|PLA106_04207	Cluster_4528.1	Type III secretion related protein	AEAM01000088	+	21033	22307	1275	425	ATGAGCATCGGCATCACACCCCGGCCGCAACAGACCACCACGCCACTCGATTTTTCGGCGCTAAGCGGCAAGAGTCCTCAACCAAACACGTTCGGCGAGCAGAACACTCAGCAAGCGATCGACCCGAGTGCACTGTTGTTCGGCAGCGACACACAGAAAGACGTCAACTTCGGCACGCCCGACAGCACCGTCCAGAATCCGCAGGACGCCAGCAAGCCCAACGACAGCCAGTCCAACATCGCTAAATTGATCAGTGCATTGATCATGTCGTTGCTGCAGATGCTCACCAACTCCAATAAAAAGCAGGACACCAATCAGGAACAGCCTGATAGCCAGGCTCCTTTCCAGAACAACGGCGGGCTCGGTACACCGTCGGCCGATAGCGGGGGCGGCGGTACA…	MSIGITPRPQQTTTPLDFSALSGKSPQPNTFGEQNTQQAIDPSALLFGSDTQKDVNFGTPDSTVQNPQDASKPNDSQSNIAKLISALIMSLLQMLTNSNKKQDTNQEQPDSQAPFQNNGGLGTPSADSGGGGTPDATGGGGGDTPSATGGGGGDTPTATGGGGSGGGGTPTATGGGSGGTPTATGGGEGGVTPQITPQLANPNRTSGTGSVSDTAGSTEQAGKINVVKDTIKVGAGEVFDGHGATFTADKSMGNGDQGENQKPMFELAEGATLKNVNLGENEVDGIHVKAKNAQEVTIDNVHAQNVGEDLITVKGEGGAAVTNLNIKNSSAKGADDKVVQLNANTHLKIDNFKADDFGTMVRTNGGKQFDDMSIELNGIEANHGKFALVKSDSDDLKLA…	122	+	20881	20911	GGGAACCGGTCGCTGCGCTTTGCCACTCACT
Pseudomonas syringae	1	Pla302278PT	Pla302278PT|PLA106_04222	Cluster_3994.1	Type III Effector	AEAM01000088	-	25204	26256	1053	351	ATGTATATCCAGCAATCTGGCGCCCAATCAGGGGTTGCCGCTAAGACGCAACACGATAAGCCCTCGTCATTGTCCGGACTCGCCCCCGGTTCGTCGGATGCGTTCGCCCGTTTTCATCCCGAAAAGGCGGGCGCCTTTGTCCCATTGGAGGGGCATGAAGAGGTCTTTTTCGATGCGCGCTCTTCCTTTTCGTCGGTCGATGCCGCTGATCTTCCCAGTCCCGAGCAGGTACAACCCCAGCTTCATTCGTTGCGTACCCTGCTACCGGATCTGATGGTCTCTATCGCCTCATTACGTGACGGCGCCACGCAATACATCAAGACCAGAATCAAGGCTATGGCGGACAACAGCATAGGCGCGACTGCGAACATCGAAGCCAAAAGAAAGATTGCCCAAGAG…	MYIQQSGAQSGVAAKTQHDKPSSLSGLAPGSSDAFARFHPEKAGAFVPLEGHEEVFFDARSSFSSVDAADLPSPEQVQPQLHSLRTLLPDLMVSIASLRDGATQYIKTRIKAMADNSIGATANIEAKRKIAQEHGCQLVHPFHQSKFLFEKTIDDRAFAADYGRAGGDGHACLGLSVNWCQSRAKGQSDEAFFHKLEDYQGDALLPRVMGFQHIEQQAYSNKLQNAAPMLLDTLPKLGMTLGKGLGRAQHAHYAVALENLDRDLKAVLQPGKDQMLLFLSDSHAMALHQDSQGCLHFFDPLFGVVQADSFSNMSHFLADVFKRDVGTHWRGTEQRLQLSEMVPRADFHLR*	524	-	26780	26811	GGGAACCGCATCACGTCTTGAACCACAGAGGA
Pseudomonas syringae	1	Pla302278PT	Pla302278PT|PLA106_08785	Cluster_1422.1	NA	AEAM01000171	+	11291	12010	720	240	ATGAGTCATGTCACTTGCAAAGCAGCCCATCAGGAGCTGCCAACGCCTTCCATACCGCAGGCCAGCCGTCATGGCATAGGCGTGAGGATCGCCTCTCAACTCACGGTTCATGTCGAGCCGTACGCCAACATGGACGAGGGCGATCTGATCGAGCTGTTCTGGGACGGCTGTTACGTCGCGTCAAAAATTCTAAAGGCTTCCGACATCGACAAAACCATTGTCCTACGTGTACCCGAAAGCTTTCTTCAGAACGGCAAGGCGCGGACCTACTACCGGGTCATGAAAATAGGCGGAACACCCCTGACCTCGCCGTGCCGCAAGCTGTGGGTCAAGCTGAGCGCCCCCGGCGGCAATCTGATCAGTGCCCACACGGAAGAAAACCAGGGCCTGGCACCGCTC…	MSHVTCKAAHQELPTPSIPQASRHGIGVRIASQLTVHVEPYANMDEGDLIELFWDGCYVASKILKASDIDKTIVLRVPESFLQNGKARTYYRVMKIGGTPLTSPCRKLWVKLSAPGGNLISAHTEENQGLAPLYVAPSVIRRGLSRRHLEGGLPMTIEPYLNMAVHDEITVRWGDLRMDLPPLIAEDVGEPIDLVIPPALIIEGGEEQRLEVTYCVIDRVGNNSLWAPPRLIKALPIDE*	716	+	10544	10575	GAGAACCGTACGATGGTGATCGTCACTCACGA
Pseudomonas syringae	1	Pla302278PT	Pla302278PT|PLA106_10666	Cluster_907.1	Type III Effector	AEAM01000202	-	26590	27927	1338	446	ATGCCTACAGCGGAGGATGCCAGCGTGCGTCGTAGGCCACAGGTGACTGCCGATGCCGCCGCCAACAGTATCGTTCAGCAATTGGTCAGTGAGGGCGCTGATATTTCGCATACTCGTAACATGCTCCGCAATGCAATGAATGGCGACGCAGTCGCTTTTTCTCGAGTAGAACAGAACATATTTCGCCAGCATTTCCCGAACATGCCCATGCATGGAATCAGCCGAGATTCGGAACTCGCTATCGAGCTCCGTGGGGCGCTTCGTCGAGCGGTTCACCAACAGGCGGCGTCAGCGCCAGTGAGGTCGCCCACGCCAACACCGGCCAGCCCTGCGGCATCATCATCGGGCAGCAGTCAGCGTTCTTTATTTGGACGGTTTGCCCGTTTGATGGCGCCAAAC…	MPTAEDASVRRRPQVTADAAANSIVQQLVSEGADISHTRNMLRNAMNGDAVAFSRVEQNIFRQHFPNMPMHGISRDSELAIELRGALRRAVHQQAASAPVRSPTPTPASPAASSSGSSQRSLFGRFARLMAPNQGRSSNTAASQTPVDRSPPRVNQRPIRVDRAAMRNRGNDEADAALRGLVQQGVNLEHLRTALERHVMQRLPIPLDIGSALQNVGINPSIDLGESLVQHPLLNLNVALNRMLGLRPSAERAPRPAVPVAPATASRRPDGTRATRLRVMPEREDYENNVAYGMRLLNLNPGVGVRQAVAAFVTDRAERPAVVANIRAALDPIASQFSQLRTISKADAESEELGFKDAADHHTDDVTHCLFGGELSLSNPDQQVIGLAGNPTDTSQPYS…	300	-	28227	28259	TGGAACTCTTTCCTGCTCTTTTGCCACACAGCG
Pseudomonas syringae	1	Pla302278PT	Pla302278PT|PLA106_13794	Cluster_6364.1	Type III Effector	AEAM01000243	+	12337	13479	1143	381	ATGAACCCCATTCAGTCACGCTTCTCCAGTGTGCAAGAGCTCAGACGATCCAACGTTGATATTCCGGCGCTCAAAGCCAATGGCCAACTGGAGGTCGACGGCAAGAGGTACGAGATTCGTGCAGCCGATGACGGAACAATTTCGGTCCTTCGACCGGAGCAACAATCCAAAGCGAAAAGTTTTTTCAAGGGCGCTTCTCAGTTGATAGGTGGCAGCAGCCAGCGCGCGCAGATTGCCCAGGCGCTCAACGAGAAAGTCGTATCGGCACGCACTGTCTTGCACCAGGGCGCTGTGACGGGCGGACGCCTGGACACCCTTGAGCGGGGCGAAAGCAGCTCAGCCACAACAGCCATCAAACCCACTGCCAAACAGGCTGCGCAAAATACTTTTAACAGCTTT…	MNPIQSRFSSVQELRRSNVDIPALKANGQLEVDGKRYEIRAADDGTISVLRPEQQSKAKSFFKGASQLIGGSSQRAQIAQALNEKVVSARTVLHQGAVTGGRLDTLERGESSSATTAIKPTAKQAAQNTFNSFHEWAKQAEAMRNPSRMDIYKIYKQDAPHSHPMSDEQQEEFLHTLKALNGKNGIEVRTQDHDSVRNKKDRNLDKYIAESPDAKRFFYRIIPKHERREDKHQGRLTIGVQPQYATQLTRAMATLIGKESAITHGKVIGPACHGQMTDSAVLYINGDVAKAEKLGEKLKQMSGIPLDAFVEHTPLSMQSLSKGLSYAESILGDTRGHGMSRAEVISDALRMDGMPFLARLKLSLSANGYDPDNPALRNTK*	455	+	11850	11882	TGGAACCGCCTCGAGCAGAGGCTCCACTCATTG
Pseudomonas syringae	1	Pla302278PT	Pla302278PT|PLA106_13869	Cluster_23630.1	Type III Effector	AEAM01000246	-	4387	4881	495	165	ATGGGAAATATATGTGTCGGCGGATCCAGGATGGCCCATCAGGTGAACTCCCCAGACCGAGTTAGTAACAACTCGGGTGACGAAGATAACGTAACGTCCAGTCAACTGCTGAGCGTCAGACATCAACTTGCGGAGTCTGCTGGTGTACCAAGAGATCAGCATGAATTTGTTAGTAACCAAGCACCTCAAAGCCTGAGAAATCGCTACAACAATCTTTACTCACATACGCAAAGAACACTGGATATGGCGGACATGCAGCATAGGTACATGACGGGAGCGTCAGGAATCAATCCGGGAATGCTGCCACATGAGAATGTGGACGATATGCGTAGCGCTATAACTGATTGGAGTGACATGCGCGAAGCTCTGCAGCACGCAATGGGTATCCATGCCGACATC…	MGNICVGGSRMAHQVNSPDRVSNNSGDEDNVTSSQLLSVRHQLAESAGVPRDQHEFVSNQAPQSLRNRYNNLYSHTQRTLDMADMQHRYMTGASGINPGMLPHENVDDMRSAITDWSDMREALQHAMGIHADIPPSPERFVATMNPNGSIRMSTLSPSPYRNWQ*	36	-	4917	4949	TGGAACCGATCCGCTCCCTATGACCACTCAAGT
Pseudomonas syringae	1	Pla302278PT	Pla302278PT|PLA106_20413	Cluster_6824.2	NA	AEAM01000367	-	7398	7790	393	131	ATGTCTGAGCTCCAGCACGATCAGCATGAAGACGGCACCTTGCGTTTTCTGCCCAGTCGCTTGAATAACCAGCCCGTGGTGATTGGTGGTCTTACGGCGGATGAGATGTGGGTGACCGTTTTTGGCTGCAGCGGGGCAGGCTTTGTGATGGGGCTGCCGTTGGCCTTCGTGATCACTCCATCCATGCCCGTGGTCTGCGCGCTCATCGGAGGAACATTGGGGCTGCTCATCGCTGCTCGGGTCTTGCGACGTCTCAAACGCGGTCGACCGGAGACCTGGTTCTACCGCACGTTGCAGTTGCGGCTCGCCACACTCGGCCCTACGTCATACAACAACGCGAATCTGGTCATCCGATCGGGCAACTGGACGTGCCGTCGGAGGGCGCAACAATGA	MSELQHDQHEDGTLRFLPSRLNNQPVVIGGLTADEMWVTVFGCSGAGFVMGLPLAFVITPSMPVVCALIGGTLGLLIAARVLRRLKRGRPETWFYRTLQLRLATLGPTSYNNANLVIRSGNWTCRRRAQQ*	1521	-	9311	9343	TGGACCCGAATCCGTCTTAAACACCACTCAAGG
Pseudomonas syringae	1	Pla302278PT	Pla302278PT|PLA106_20423	Cluster_41311.1	NA	AEAM01000367	-	8194	8427	234	78	ATGTCCTCCACCCAGACCAGCGCATTCCAGGCGGCGGCGGGCTTTACGCCTGCCAGCAGCAACACGCTGTGGACCGGAATCGCAGTGGGGATCCTCCTGCTGTGGGGCGTCTGGGTGTTTTCAAGCATTTATCGCGGCTGGGCTACCCGAAACCTGGCAGCCCCGGCGGCGGCAGTCGCTGCCGCTCGCTGGGCGGTGCTGTTCATGATCATGACTTTCATGTTGTTGAGTTGA	MSSTQTSAFQAAAGFTPASSNTLWTGIAVGILLLWGVWVFSSIYRGWATRNLAAPAAAVAAARWAVLFMIMTFMLLS*	884	-	9311	9343	TGGACCCGAATCCGTCTTAAACACCACTCAAGG
Pseudomonas syringae	1	Pla302278PT	Pla302278PT|PLA106_21293	Cluster_2333.2	Type III Effector	AEAM01000391	-	32769	33632	864	288	ATGAACATTACGCCGCTCACGTCAGCCGCGGGCAAGGGCTCGTCCGCACAAGGCACAGACAAAATTTCCATTCCCAACTCCACGCGCATGATCAATGCCGCGTCAATCAAGTGGTTGAACAAGGTGCGTAGCGCCATCAGTGACCACATCCGCACCAGCATCGAGAAAGGGAAACTGTTCGAGCTCGCCTCCTTGGGCAGCAACATGTTCGGTGTCCCGGCTCTTTCAGCGCGCCCCTCGACGCTCCAACCTGTGTTGGCGTTTGAGGCTGACCCCAATCACGACCTGAACCTTGTCAGGGTCTATATGCAGGACAGCGCCGGCAAGCTCACTCCCTGGGACCCGACGCCCAACGCGGTCACGACGACGTCGAATCCATCAGAGCCTGATGCGCAGAGC…	MNITPLTSAAGKGSSAQGTDKISIPNSTRMINAASIKWLNKVRSAISDHIRTSIEKGKLFELASLGSNMFGVPALSARPSTLQPVLAFEADPNHDLNLVRVYMQDSAGKLTPWDPTPNAVTTTSNPSEPDAQSDTASSSLPRRPPAGSVLSLLGIALDHAQRHSPRADRSAKGRPGREERNGARFNAKQTKPTEAEAYGDHQTPNPDLHRQKETAQRVAESINSMREQQNGMQRAEGLLRAKEALQAREAARKQLLDVLEAIQAGREDSTDKKISATEKNATGINYQ*	22	-	33654	33685	AGGAACTCATTACCGCGAATCGCCACTCAGCA
Pseudomonas syringae	1	Pla302278PT	Pla302278PT|PLA106_22348	Cluster_452.1	Type III Effector	AEAM01000417	+	1444	7176	5733	1911	ATGCGAAATCGGCCGCATGCCAGTTTGAACAGTCAGGTGCTCGAACTGCAAGCGGTGCCGTCGCAACGTGGTAAGCATGTTCGTGTCAGAAGTCATGCCGATGGCGAGAGTGTCATTAATGCCTGGCTGGCAAAGCGCCCCTCGGTTCAAAGCGAAACCAGTCTTGATAACGATGGCAAACTGGTGCGTTACACCCCCGTGAATCATGAGCCGCTGGCGCCGCGCAATGAGGCGTTTTTCACCTCTGTGCCGGGGATGTTGATGGCCGTTTTGACGGTCCACCCCGAGATGGAACATGGCATCAGCGGGGACATAACTGCTGATGCTGTGGCTGCCCGGCTTGCCGAACCGCCAATAGGGTTGCTAACCGGAATCTGGCAGTCTTCCCATGATCGAGCC…	MRNRPHASLNSQVLELQAVPSQRGKHVRVRSHADGESVINAWLAKRPSVQSETSLDNDGKLVRYTPVNHEPLAPRNEAFFTSVPGMLMAVLTVHPEMEHGISGDITADAVAARLAEPPIGLLTGIWQSSHDRAYLERGGVVHTANMEERWAPLTLPGINPREPLRMAGLQADGGVYLHNGSQLWRLTETAAESVTTENLPEGAAVRIGAGGEVHGLHEGALHSNGISRPIELWRPKAGAPGREQSPARPVDLLPLPGGPAALILDDKGRIYHADLKGTGAVEAHRLKLPADFAQGKGWAVTAMGLSRDDTVHLMLQDQNGRRMSLQRAPGEALFRPAYLLDRPLLLLYTEGLHVPSEAAVQSHVQLDGHAQLGHIDGVLHYKAVPDQSWERLKQSGGEP…	314	+	1099	1130	CGGAACCGATCCGGTTGCCTGGCCACTCAATT
Pseudomonas syringae	1	Pla302278PT	Pla302278PT|PLA106_22883	Cluster_9052.1	Type III Effector	AEAM01000431	-	773	1942	1170	390	ATGATCAAAACAGTCAGCGATAACTCGATACCTGGTACGTATGGCATCGCGTTTACGAGGGTGGATACTGCGGCGCAGATATCCAGGCCGGTTCCCAGTGATATCCAGCGCAACAGCAGTATCGAAAAGGCAGTCATCGAACACATTGCTGACCACCCGGCGGCGAAGGTGGTAATGAGTGCGTTGGTAGAGGCGTTGACAGGTGTTTTCGTCAAGGCTCAAGGTGAAATCAAGGGCTGGGCGGAAATCGTCCAGGCGGCTTCTCGTCCTCACGACAGCAACCGAAAGGGCAACGGTGTGCTGAGTGCGCGTTTCGATGTAATGGGCTGTGTGGGTTGGAATGCTGCAACGATTCGGGCTACCTGCCGGGTCGGCACACTGCGTGAAAAAGGCACGTTG…	MIKTVSDNSIPGTYGIAFTRVDTAAQISRPVPSDIQRNSSIEKAVIEHIADHPAAKVVMSALVEALTGVFVKAQGEIKGWAEIVQAASRPHDSNRKGNGVLSARFDVMGCVGWNAATIRATCRVGTLREKGTLFTNLMLSDNFKRILERSMTDPALQRKLEGLVDLDYLKTTDGNLYAMSGWAARASESREQIGKAAFESASNLGSAQISARELAFHRHNPVNHPSNQARVGFGISSPANNDLQVLRGHGSSVWKVKPGSDFARLASASGKPVIAGPSGTASRFMAVARFISPGCLRDLGLDSEQAFKELVRYACYGYFGQDDHHSMLEVNLGIAPHGLDEQWDDKLYTEPFSHVIMGRGFSVDNAAQQHIVARATDEPVEHSAADRVG*	2332	-	4274	4305	TGGAACCGGACGAGGCTTTTTACCACTCAATG
Pseudomonas syringae	1	Pla302278PT	Pla302278PT|PLA106_22893	Cluster_3432.1	Type III Effector	AEAM01000431	-	2901	3758	858	286	ATGAAAATATCCGGCTCCACATCGCCTGCACACACTTCAACGAATTCCGCGCAGAAGTCCTCTTCAAAAGAGCTGCTGAGTGGTTTGGCCAAGCATTTCAAGGGGATGCTCGTTTCTGGCAACACTTCTGGTCATTCGGCGCTCGGGCATTACGCGTCATCCAGCAGCGGCTCCAAAGGCAAGGCACCGGTACGGGACGATTACAGCAACGGACCGCAAACACGCCTTAACAACACACCTCTGAAACGAGCACTGGCCCGAGAGCTTGATCGCTTTGGCTACGGTTCATCGGCGACCGAGTCTTTTGACCGCTCATTGCAGCGTAAGGATAAAAATCCAGAGCTTGGTCACCTTGATGACGACGAGTACCTCGCTTTGCGCATGTACACAACGCCGTTT…	MKISGSTSPAHTSTNSAQKSSSKELLSGLAKHFKGMLVSGNTSGHSALGHYASSSSGSKGKAPVRDDYSNGPQTRLNNTPLKRALARELDRFGYGSSATESFDRSLQRKDKNPELGHLDDDEYLALRMYTTPFYRAVNHQLRDGKPSEDMKVVVEAMNKGLKRLAEHPDNVVKETLYRGINKVVDDKFIHKNFKLGEVYRDKTFVSATPDLSTVNATFTRHTVKSSKARHQHLCINAVHYWRLRAVLQYASGKFRCRVLKRKGFLRLILPFWWRTRAGQTREGGI*	516	-	4274	4305	TGGAACCGGACGAGGCTTTTTACCACTCAATG
Pseudomonas syringae	1	Pla302278PT	Pla302278PT|PLA106_22928	Cluster_828.1	Type III Effector	AEAM01000433	-	75	2843	2769	923	ATGATGCCATCTCAGATCACGCGCTCCTCTCATTCATCCTCGCCGGATGCCTCTCAACCGGCTTGCGATGCTGCAAGTAGCCTCGAGCAATCGCCGCAGCAGGTCCGCACCCGGGCGTTTGTCGCCAAAGGCAAACTGTCTGAGGCATTCGGGCGCACGTCTACTGCGCCGGCGCAGGATGCGGTGCACCTGCTGAACAATCTTCAGCGCGAGCTGGCGAAAGAGAATCCGTCTGGTCCCGAGCTTGCCCTGCTGGGCAAAGAGCTCGCCGCTGCCGCGATGACCGAGCAGGGCTCGCATCTGCTGGCCACCGAAGAACACCAGCACGTGTTGAAAGACGTGCTTGATCGTTGCATGCGCCAGTTGGCGGATACGCCTGCGTCTAATGCGTCCCATGTA…	MMPSQITRSSHSSSPDASQPACDAASSLEQSPQQVRTRAFVAKGKLSEAFGRTSTAPAQDAVHLLNNLQRELAKENPSGPELALLGKELAAAAMTEQGSHLLATEEHQHVLKDVLDRCMRQLADTPASNASHVPLSQACEGLKTARLHQSLAMLTGTSHTQTRGVADLLALTQLDPKVLAEKLDGQAPYESFGHFIRTARDSTAALNVSLSDPAGETTGLLRAQADTLEALEKLPAILAALIEHCPDMPTQKDLRSLKDAAGELLTKLRESALLKGSEEIVSEAGESPVHGRESVEPALTRSQALLKAGGKLVRKFDAYGAVAPMDDKKLLALLRTPAPHLSPAQMHAFLNRYAIQLTDEQRTIVSNTALPPASEGDIEAQGGMGFDEKLRLALADGSL…	44	-	2887	2918	GGGAACCGTTCCGGATCGAGCGCCACTTAGCC
Pseudomonas syringae	1	Pla302278PT	Pla302278PT|PLA106_22943	Cluster_12060.1	Type III Effector	AEAM01000434	+	123	779	657	219	GTGAGAGTATCAAACACTTTGCAGCCAGCGGTCGAACATACTACTCAAGCAACTATAGGGGGATGCTCCAGCTCCACAGCTTCACGCATCAAAGAGATACCTTTCAAGCAAGCAGATGAGCTGGCAAGGGTCGGCGATCAACGAGCGGCCTGCGTTGTGTTAACCGCAGCGTGGTTGGACCGCGTCCGCCATCACTCACAACCGGCCGAAGCACGTATCGATCATATGCGACATAGAGCGACCCTGGAACAAGTTGCTGAGCGTCAGCAGACGTACCGTAATCATGAAATAAATAATCCTCGTACTCCGTACGAAATATTATTCTCTCCCACCTTCCGAGATTATTCATTGCGTCTCAGTAATGCTCGCATTCTTGATGTTATGAGCGATGAAGCACAA…	VRVSNTLQPAVEHTTQATIGGCSSSTASRIKEIPFKQADELARVGDQRAACVVLTAAWLDRVRHHSQPAEARIDHMRHRATLEQVAERQQTYRNHEINNPRTPYEILFSPTFRDYSLRLSNARILDVMSDEAQAMGSMANTLRDPNSSHVLVIVRMNGDNHAIATHCTGNKLHVFDPNHGEYSFKADTGTVEENMRDIIQAYSSRFPVPEIHILPVRS*	26	+	66	97	CGGAACTGATAGAAGGTCTCGACCACTCAGTG
Pseudomonas syringae	1	Pla302278PT	Pla302278PT|PLA106_27566	Cluster_16605.1	Type III Effector	AEAM01000552	-	427	1323	897	299	ATGAGAATACAAGGTGGTACGCCTTTTAGCATTCAACAGAACACAATGTCTGAGCATAACCCAGCTCAAGAGCAAGGGAGGTTTTCTTTCGGCGAGGAACGGGTTTCAATCAGCTCGCCTGTCGGCTCCCAAGCATCAGTGTCAACGGAACCCGCTGAAAACGCACGAGTTATGAGCGTCATGCTGAGCCCACAAAGGCCAAATGTAAAGAAAGCCGATCTTATTCCAGGCGATATTTTGCTTCTGATCGATGAGCCACATGATACCGAGAAGCTGCATAAAATTATTATTGCAGGCCAAAAACTTGAAGGTCTGTCTATGCTGAGGAATAATCTAGGTAAAGCCAGTGCGGTTCACGCAATATTGTGGACTCGAAATCCCCAAAATCCAGTTTCAACC…	MRIQGGTPFSIQQNTMSEHNPAQEQGRFSFGEERVSISSPVGSQASVSTEPAENARVMSVMLSPQRPNVKKADLIPGDILLLIDEPHDTEKLHKIIIAGQKLEGLSMLRNNLGKASAVHAILWTRNPQNPVSTERGGKGESEVVEMRGGGIMDTALRKGLYQVYRPKDKNIGDWAAQSAMSWASERKIPYNAIKSAKSVTRFSNFGPLAIASAKKYGKDAFESNPKWGEDGAFCSHLVLAAYQAAAQNVGTPLSGALKVDAKGCSVRTLSHFLKKDTTQFEFTGHLRIKPDEVLFPED*	138	-	1461	1493	TGGAACCGATCGAGGGGTTCTGACCACATAAGT
Pseudomonas syringae	1	Pla3988	Pla3988|AC500_0876	Cluster_9052.1	Type III Effector	Pla3988_Scaffold018	-	794	1963	1170	390	ATGATCAAAACAGTCAGCGATAACTCGATACCTGGTACGTATGGCATCGCGTTTACGAGGGTGGATACTGCGGCGCAGATATCCAGGCCGGTTCCCAGTGATATCCAGCGCAACAGCAGTATCGAAAAGGCAGTCATCGAACACATTGCTGACCACCCGGCGGCGAAGGTGGTAATGAGTGCGTTGGTAGAGGCGTTGACAGGTGTTTTCGTCAAGGCTCAAGGTGAAATCAAGGGCTGGGCGGAAATCGTCCAGGCGGCTTCTCGTCCTCACGACAGCAACCGAAAGGGCAACGGTGTGCTGAGTGCGCGTTTCGATGTAATGGGCTGTGTGGGTTGGAATGCTGCAACGATTCGGGCTACCTGCCGGGTCGGCACACTGCGTGAAAAAGGCACGTTG…	MIKTVSDNSIPGTYGIAFTRVDTAAQISRPVPSDIQRNSSIEKAVIEHIADHPAAKVVMSALVEALTGVFVKAQGEIKGWAEIVQAASRPHDSNRKGNGVLSARFDVMGCVGWNAATIRATCRVGTLREKGTLFTNLMLSDNFKRILERSMTDPALQRKLEGLVDLDYLKTTDGNLYAMSGWAARASESREQIGKAAFESASNLGSAQISARELAFHRHNPVNHPSNQARVGFGISSPANNDLQVLRGHGSSVWKVKPGSDFARLASASGKPVIAGPSGTASRFMAVARFISPGCLRDLGLDSEQAFKELVRYACYGYFGQDDHHSMLEVNLGIAPHGLDEQWDDKLYTEPFSHVIMGRGFSVDNAAQQHIVARATDEPVEHSAADRVG*	2332	-	4295	4326	TGGAACCGGACGAGGCTTTTTACCACTCAATG
Pseudomonas syringae	1	Pla3988	Pla3988|AC500_0878	Cluster_3432.1	Type III Effector	Pla3988_Scaffold018	-	2922	3779	858	286	ATGAAAATATCCGGCTCCACATCGCCTGCACACACTTCAACGAATTCCGCGCAGAAGTCCTCTTCAAAAGAGCTGCTGAGTGGTTTGGCCAAGCATTTCAAGGGGATGCTCGTTTCTGGCAACACTTCTGGTCATTCGGCGCTCGGGCATTACGCGTCATCCAGCAGCGGCTCCAAAGGCAAGGCACCGGTACGGGACGATTACAGCAACGGACCGCAAACACGCCTTAACAACACACCTCTGAAACGAGCACTGGCCCGAGAGCTTGATCGCTTTGGCTACGGTTCATCGGCGACCGAGTCTTTTGACCGCTCATTGCAGCGTAAGGATAAAAATCCAGAGCTTGGTCACCTTGATGACGACGAGTACCTCGCTTTGCGCATGTACACAACGCCGTTT…	MKISGSTSPAHTSTNSAQKSSSKELLSGLAKHFKGMLVSGNTSGHSALGHYASSSSGSKGKAPVRDDYSNGPQTRLNNTPLKRALARELDRFGYGSSATESFDRSLQRKDKNPELGHLDDDEYLALRMYTTPFYRAVNHQLRDGKPSEDMKVVVEAMNKGLKRLAEHPDNVVKETLYRGINKVVDDKFIHKNFKLGEVYRDKTFVSATPDLSTVNATFTRHTVKSSKARHQHLCINAVHYWRLRAVLQYASGKFRCRVLKRKGFLRLILPFWWRTRAGQTREGGI*	516	-	4295	4326	TGGAACCGGACGAGGCTTTTTACCACTCAATG
Pseudomonas syringae	1	Pla3988	Pla3988|AC500_0885	Cluster_828.1	Type III Effector	Pla3988_Scaffold018	-	11428	14196	2769	923	ATGATGCCATCTCAGATCACGCGCTCCTCTCATTCATCCTCGCCGGATGCCTCTCAACCGGCTTGCGATGCTGCAAGTAGCCTCGAGCAATCGCCGCAGCAGGTCCGCACCCGGGCGTTTGTCGCCAAAGGCAAACTGTCTGAGGCATTCGGGCGCACGTCTACTGCGCCGGCGCAGGATGCGGTGCACCTGCTGAACAATCTTCAGCGCGAGCTGGCGAAAGAGAATCCGTCTGGTCCCGAGCTTGCCCTGCTGGGCAAAGAGCTCGCCGCTGCCGCGATGACCGAGCAGGGCTCGCATCTGCTGGCCACCGAAGAACACCAGCACGTGTTGAAAGACGTGCTTGATCGTTGCATGCGCCAGTTGGCGGATACGCCTGCGTCTAATGCGTCCCATGTA…	MMPSQITRSSHSSSPDASQPACDAASSLEQSPQQVRTRAFVAKGKLSEAFGRTSTAPAQDAVHLLNNLQRELAKENPSGPELALLGKELAAAAMTEQGSHLLATEEHQHVLKDVLDRCMRQLADTPASNASHVPLSQACEGLKTARLHQSLAMLTGTSHTQTRGVADLLALTQLDPKVLAEKLDGQAPYESFGHFIRTARDSTAALNVSLSDPAGETTGLLRAQADTLEALEKLPAILAALIEHCPDMPTQKDLRSLKDAAGELLTKLRESALLKGSEEIVSEAGESPVHGRESVEPALTRSQALLKAGGKLVRKFDAYGAVAPMDDKKLLALLRTPAPHLSPAQMHAFLNRYAIQLTDEQRTIVSNTALPPASEGDIEAQGGMGFDEKLRLALADGSL…	44	-	14240	14271	GGGAACCGTTCCGGATCGAGCGCCACTTAGCC
Pseudomonas syringae	1	Pla3988	Pla3988|AC500_1720	Cluster_907.1	Type III Effector	Pla3988_Scaffold037	-	26612	28195	1584	528	ATGGCGGGTATCAATAGAGCGGGACCATCGGGCGCTTATTTTGTTGGCCACACAGACCCCGAGCCAGTATCGGGGCAAGCACACGGATCCGGCAGCGGCGCCAGCTCCTCGAACAGTCCGCAGGTTCAGCCGCGACCCTCGAATACTCCCCCGTCGAACGCGCCCGCACCGCCGCCAACCGGACGTGAGAGGCTTTCACGATCCACGGCGCTGTCGCGCCAAACCAGGGAGTGGCTGGAGCAGGGTATGCCTACAGCGGAGGATGCCAGCGTGCGTCGTAGGCCACAGGTGACTGCCGATGCCGCCGCCAACAGTATCGTTCAGCAATTGGTCAGTGAGGGCGCTGATATTTCGCATACTCGTAACATGCTCCGCAATGCAATGAATGGCGACGCAGTC…	MAGINRAGPSGAYFVGHTDPEPVSGQAHGSGSGASSSNSPQVQPRPSNTPPSNAPAPPPTGRERLSRSTALSRQTREWLEQGMPTAEDASVRRRPQVTADAAANSIVQQLVSEGADISHTRNMLRNAMNGDAVAFSRVEQNIFRQHFPNMPMHGISRDSELAIELRGALRRAVHQQAASAPVRSPTPTPASPAASSSGSSQRSLFGRFARLMAPNQGRSSNTAASQTPVDRSPPRVNQRPIRVDRAAMRNRGNDEADAALRGLVQQGVNLEHLRTALERHVMQRLPIPLDIGSALQNVGINPSIDLGESLVQHPLLNLNVALNRMLGLRPSAERAPRPAVPVAPATASRRPDGTRATRLRVMPEREDYENNVAYGMRLLNLNPGVGVRQAVAAFVTDRA…	54	-	28249	28281	TGGAACTCTTTCCTGCTCTTTTGCCACACAGCG
Pseudomonas syringae	1	Pla3988	Pla3988|AC500_1828	Cluster_3032.1	NA	Pla3988_Scaffold039	+	653	769	117	39	ATGGCCCCTGCCGCAAACGAATCCGTATCGCTGGGCGGCCTCTGCGGCGGCCTCTGCGGCGGCCTCGATGGCGGCACGCTGGTCAGCTGCACTCTGGGCACTACCAGCGTCTGCTGA	MAPAANESVSLGGLCGGLCGGLDGGTLVSCTLGTTSVC*	581	+	42	72	TGGAACCGATTTCGATGAGTCGCCACACATA
Pseudomonas syringae	1	Pla3988	Pla3988|AC500_3723	Cluster_3994.1	Type III Effector	Pla3988_Scaffold106	+	198215	199267	1053	351	ATGTATATCCAGCAATCTGGCGCCCAATCAGGGGTTGCCGCTAAGACGCAACACGATAAGCCCTCGTCATTGTCCGGACTCGCCCCCGGTTCGTCGGATGCGTTCGCCCGTTTTCATCCCGAAAAGGCGGGCGCCTTTGTCCCATTGGAGGGGCATGAAGAGGTCTTTTTCGATGCGCGCTCTTCCTTTTCGTCGGTCGATGCCGCTGATCTTCCCAGTCCCGAGCAGGTACAACCCCAGCTTCATTCGTTGCGTACCCTGCTACCGGATCTGATGGTCTCTATCGCCTCATTACGTGACGGCGCCACGCAATACATCAAGACCAGAATCAAGGCTATGGCGGACAACAGCATAGGCGCGACTGCGAACATCGAAGCCAAAAGAAAGATTGCCCAAGAG…	MYIQQSGAQSGVAAKTQHDKPSSLSGLAPGSSDAFARFHPEKAGAFVPLEGHEEVFFDARSSFSSVDAADLPSPEQVQPQLHSLRTLLPDLMVSIASLRDGATQYIKTRIKAMADNSIGATANIEAKRKIAQEHGCQLVHPFHQSKFLFEKTIDDRAFAADYGRAGGDGHACLGLSVNWCQSRAKGQSDEAFFHKLEDYQGDALLPRVMGFQHIEQQAYSNKLQNAAPMLLDTLPKLGMTLGKGLGRAQHAHYAVALENLDRDLKAVLQPGKDQMLLFLSDSHAMALHQDSQGCLHFFDPLFGVVQADSFSNMSHFLADVFKRDVGTHWRGTEQRLQLSEMVPRADFHLR*	524	+	197660	197691	GGGAACCGCATCACGTCTTGAACCACAGAGGA
Pseudomonas syringae	1	Pla3988	Pla3988|AC500_3726	Cluster_4528.1	Type III secretion related protein	Pla3988_Scaffold106	-	202164	203438	1275	425	ATGAGCATCGGCATCACACCCCGGCCGCAACAGACCACCACGCCACTCGATTTTTCGGCGCTAAGCGGCAAGAGTCCTCAACCAAACACGTTCGGCGAGCAGAACACTCAGCAAGCGATCGACCCGAGTGCACTGTTGTTCGGCAGCGACACACAGAAAGACGTCAACTTCGGCACGCCCGACAGCACCGTCCAGAATCCGCAGGACGCCAGCAAGCCCAACGACAGCCAGTCCAACATCGCTAAATTGATCAGTGCATTGATCATGTCGTTGCTGCAGATGCTCACCAACTCCAATAAAAAGCAGGACACCAATCAGGAACAGCCTGATAGCCAGGCTCCTTTCCAGAACAACGGCGGGCTCGGTACACCGTCGGCCGATAGCGGGGGCGGCGGTACA…	MSIGITPRPQQTTTPLDFSALSGKSPQPNTFGEQNTQQAIDPSALLFGSDTQKDVNFGTPDSTVQNPQDASKPNDSQSNIAKLISALIMSLLQMLTNSNKKQDTNQEQPDSQAPFQNNGGLGTPSADSGGGGTPDATGGGGGDTPSATGGGGGDTPTATGGGGSGGGGTPTATGGGSGGTPTATGGGEGGVTPQITPQLANPNRTSGTGSVSDTAGSTEQAGKINVVKDTIKVGAGEVFDGHGATFTADKSMGNGDQGENQKPMFELAEGATLKNVNLGENEVDGIHVKAKNAQEVTIDNVHAQNVGEDLITVKGEGGAAVTNLNIKNSSAKGADDKVVQLNANTHLKIDNFKADDFGTMVRTNGGKQFDDTSIELNGIEANHGKFALVKSDSDDLKLA…	122	-	203560	203590	GGGAACCGGTCGCTGCGCTTTGCCACTCACT
Pseudomonas syringae	1	Pla3988	Pla3988|AC500_3735	Cluster_4702.2	Type III secretion related protein	Pla3988_Scaffold106	+	217452	218564	1113	371	ATGCAAGCACTTAACAGCATCAGTTCGTTGCAAACCTCTGCATCATTGTTCCCCGTGTCGCTCAACAGCGATGTGAGCGCCAACACCAGCACTTCCAGCAAAGAGCTCAAGGCTGTGATCGATCAGCTGGTTCAGGCGCTGACCCAAAGTGGGCAGCTCGATGAAACCTCACCGCTCGGCAAAATGCTCGCCAAGGCCATGGCTGCGGATGGCAAGTCGGCTAACAGCATCGATGACATCACTGCATCGCTCGACAAGCTGATCCACGAAAAGCTCGGCGACAATTTCGGTGCCTCTGCCGGCATCGGCGCGGGTGGCGGTGGCGGTGGCATTGGCGGGGCGGGTTCTGGTTCGGGTGTCGGTGGCGGTCTGAGCAGCGACGCGGGTGCCGGGCAATCC…	MQALNSISSLQTSASLFPVSLNSDVSANTSTSSKELKAVIDQLVQALTQSGQLDETSPLGKMLAKAMAADGKSANSIDDITASLDKLIHEKLGDNFGASAGIGAGGGGGGIGGAGSGSGVGGGLSSDAGAGQSDLMSQVLNGLGKAVLDDLLTPSGEGGTTFSSDDMPTLEKVAQFMDDNKAQFPTRDGGSWMNELKEDNGLDAQETAQFRSALDVIGQQLGQQQGDASGVTSGGGLGSPVSDSSLGNPAIDANTGPAANGNASVDVGQLIGQLIDRGLQSVSSGGGLGTPVDNSTQPTGGTPAANPTGNVSNQDLGQLLSGLLQRGLEATLQDAGNTGADLQSSAAQVAAQLINALLQGTNNQTNQAVA*	442	+	216978	217010	TGGAACCGATTCGCAGGCTGCTGCCACCTAGTG
Pseudomonas syringae	1	Pla3988	Pla3988|AC500_3736	Cluster_28714.2	Type III secretion related protein	Pla3988_Scaffold106	+	218592	218966	375	125	GTGACCATTTCCCAACTCAGCAATTTGAAAAGTGTATCGCCGGAGCTTGGGCAGAATGCTCATCAGGGGCTCGGCTCCGAACCCGTTCAGGCGGATGTCGACCTATTCAATGCGGCGATGCGCCCTGACAGCGGGCCAGCAGCGTCGCACCTGTCCGACCGGATAGCCAGTGCGCTGTCCGAGCGGCTGGGCAGTACCGAGAAGCTTTCACAGCAAGCATTACGCCAGATGAAGAAAGTGTCGAACACCGAAGATCCTGGAGACATCGTGCAGATGAGTCGGGCGTTGTCGCAGTGCTCGTTGCAAATGGCGTTGACGACCAAGGTCGTGAGCAAGAGCGCTCAGGCGCTCGACAAGTTGACCAACCTGCAGTAG	VTISQLSNLKSVSPELGQNAHQGLGSEPVQADVDLFNAAMRPDSGPAASHLSDRIASALSERLGSTEKLSQQALRQMKKVSNTEDPGDIVQMSRALSQCSLQMALTTKVVSKSAQALDKLTNLQ*	1582	+	216978	217010	TGGAACCGATTCGCAGGCTGCTGCCACCTAGTG
Pseudomonas syringae	1	Pla3988	Pla3988|AC500_3740	Cluster_49085.1	Type III secretion related protein	Pla3988_Scaffold106	+	221020	221244	225	75	ATGATCAGTTTCAACAGCTTGCAACGCCATCTCGACAACTCGGTGAGCCGTGCTCACACCAACATGGACCAGGCAGCGATGGAAGCCTCCGAGAGTGGCACCGTCGAAGACCTGCAGGCATTCAACGATGCCCAGCAGCAGGTCGATGTCGCCGGTATTGCCGTCAATGAATGCCTGCGTGCCAAGCACGGTATCAATAAAGCAGTCATCGATGGAATTCAGTGA	MISFNSLQRHLDNSVSRAHTNMDQAAMEASESGTVEDLQAFNDAQQQVDVAGIAVNECLRAKHGINKAVIDGIQ*	30	+	220958	220990	TGGAACCGCTCGGCGGGTTTGCTCCACTCAAGG
Pseudomonas syringae	1	Pla3988	Pla3988|AC500_3751	Cluster_3403.1	Type III secretion related protein	Pla3988_Scaffold106	-	228685	229254	570	190	ATGACCGCACCGATCAAAACCCCGGCCAAAGCGCCACCAGCACCCCAGCGCCCTGCGCCTGTCGAGCGGCCAGCCACAGCTCTTAGCGAAAAACCATTCGGTGAAAAACGCCCTGCATCCGGTGGCCTGGGCCGTGGCGATGTACAGACCAGCCGTTCGGTACTGAGCAAGTCGCTGCAAGACACCCCGATGAGTGCCGACGGCATGTTCTTTTCGCAACTGCTGGTGCCGCCCGTAAGTGCCGAACCTGGTCAGCAAGGCTTTGGCGGGGGCGGTATAGCCTTTCCGGTACGCGCAGAACAAGTGCCGACCCAACTGATCGACGAGCTGGCGCAGCGCCTGCCGGATCAGCCTGACGGCCCCCTCAGTTTCACCCTGCTGATGCCCAACCTGGGCAGC…	MTAPIKTPAKAPPAPQRPAPVERPATALSEKPFGEKRPASGGLGRGDVQTSRSVLSKSLQDTPMSADGMFFSQLLVPPVSAEPGQQGFGGGGIAFPVRAEQVPTQLIDELAQRLPDQPDGPLSFTLLMPNLGSVRVNANKTENRWSVQLGFARRDVLKRLSAHTGACRDSLSQALGQDVELDMHEDLSA*	6048	-	235302	235334	GGGAACTGATCCGGGACCGTGACCCACTCAGCG
Pseudomonas syringae	1	Pla3988	Pla3988|AC500_3756	Cluster_4852.1	Type III secretion related protein	Pla3988_Scaffold106	-	234169	235275	1107	369	ATGAAAATCGTCGCTCCGCCTATCATGCGAATACTTCCGGTCGCGCCGACCCGCGTCGTGACGCCTGCTGCGCAGCCACTTCCCAATGCTGATCTGCACAATTCAGGGACTTCGCCACAACAGGTTTCGCGCTTCGCGGCCGCGCTCATCCAGCACAGACGCATCCTCATTCAGCGCGACCTGATCGCCAGCAACAATGCCTTGCAGTCGCGAGCGGTGAAGCTCGGTGAGCTTTATCAACTGCTGATGACCGATCAGGACACCGGGCTGGATAACGCGGCCAGGGTATTGCGCAAAAAGCTCATGCAGGATGACTCTTCCTCAGATCTGAAACAGGTTCTGGATTACACCGACGGTGATGCCGCCAAGGCTCATGTGGTGTTGCAAGCCGCCAGGAAG…	MKIVAPPIMRILPVAPTRVVTPAAQPLPNADLHNSGTSPQQVSRFAAALIQHRRILIQRDLIASNNALQSRAVKLGELYQLLMTDQDTGLDNAARVLRKKLMQDDSSSDLKQVLDYTDGDAAKAHVVLQAARKQAEADGEMGEHVVLTQQLKQLRRKYGPRARAGINSAKAFARPNIDNKRRVALRNLYSVAVSGQPNITGLIEALLGEQQEAGQFNIDLRDMRTAIADDLSAMTPSASHEQLRTLMHGLNTARHVTTLLKGCEHLLGRMRNKNPDLTVDPPAFLKHLLTLTANGMNVNQTLQLTQHIGGKQLKHQLAFLNGLRPMLLQLPILLWRDMKSRQTALSNLLILMAELTTQEQKQLYGGLV*	27	-	235302	235334	GGGAACTGATCCGGGACCGTGACCCACTCAGCG
Pseudomonas syringae	1	Pla3988	Pla3988|AC500_4763	Cluster_6364.1	Type III Effector	Pla3988_Scaffold143	+	81214	82356	1143	381	ATGAACCCCATTCAGTCACGCTTCTCCAGTGTGCAAGAGCTCAGACGATCCAACGTTGATATTCCGGCGCTCAAAGCCAATGGCCAACTGGAGGTCGACGGCAAGAGGTACGAGATTCGTGCAGCCGATGACGGAACAATTTCGGTCCTTCGACCGGAGCAACAATCCAAAGCGAAAAGTTTTTTCAAGGGCGCTTCTCAGTTGATAGGTGGCAGCAGCCAGCGCGCGCAGATTGCCCAGGCGCTCAACGAGAAAGTCGTATCGGCACGCACTGTCTTGCACCAGGGCGCTGTGACGGGCGGACGCCTGGACACCCTTGAGCGGGGCGAAAGCAGCTCAGCCACAACAGCCATCAAACCCACTGCCAAACAGGCTGCGCAAAATACTTTTAACAGCTTT…	MNPIQSRFSSVQELRRSNVDIPALKANGQLEVDGKRYEIRAADDGTISVLRPEQQSKAKSFFKGASQLIGGSSQRAQIAQALNEKVVSARTVLHQGAVTGGRLDTLERGESSSATTAIKPTAKQAAQNTFNSFHEWAKQAEAMRNPSRMDIYKIYKQDAPHSHPMSDEQQEEFLHTLKALNGKNGIEVRTQDHDSVRNKKDRNLDKYIAESPDAKRFFYRIIPKHERREDKHQGRLTIGVQPQYATQLTRAMATLIGKESAITHGKVIGPACHGQMTDSAVLYINGDVAKAEKLGEKLKQMSGIPLDAFVEHTPLSMQSLSKGLSYAESILGDTRGHGMSRAEVISDALRMDGMPFLARLKLSLSANGYDPDNPALRNTK*	455	+	80727	80759	TGGAACCGCCTCGAGCAGAGGCTCCACTCATTG
Pseudomonas syringae	1	PlaA7386	PlaA7386|ALQ85_00170	Cluster_6364.1	Type III Effector	PlaA7386_Contig_10	-	46560	47702	1143	380	ATGAACCCCATTCAGTCACGCTTCTCCAGTGTGCAAGAGCTCAGACGATCCAACGTTGATATTCCGGCGCTCAAAGCCAATGGCCAACTGGAGGTCGACGGCAAGAGGTACGAGATTCGTGCAGCCGATGACGGAACAATTTCGGTCCTTCGACCGGAGCAACAATCCAAAGCGAAAAGTTTTTTCAAGGGCGCTTCTCAGTTGATAGGTGGCAGCAGCCAGCGCGCGCAGATTGCCCAGGCGCTCAACGAGAAAGTCGTATCGGCACGCACTGTCTTGCACCAGGGCGCTGTGACGGGCGGACGCCTGGACACCCTTGAGCGGGGCGAAAGCAGCTCAGCCACAACAGCCATCAAACCCACTGCCAAACAGGCTGCGCAAAATACTTTTAACAGCTTT…	MNPIQSRFSSVQELRRSNVDIPALKANGQLEVDGKRYEIRAADDGTISVLRPEQQSKAKSFFKGASQLIGGSSQRAQIAQALNEKVVSARTVLHQGAVTGGRLDTLERGESSSATTAIKPTAKQAAQNTFNSFHEWAKQAEAMRNPSRMDIYKIYKQDAPHSHPMSDEQQEEFLHTLKALNGKNGIEVRTQDHDSVRNKKDRNLDKYIAESPDAKRFFYRIIPKHERREDKHQGRLTIGVQPQYATQLTRAMATLIGKESAITHGKVIGPACHGQMTDSAVLYINGDVAKAEKLGEKLKQMSGIPLDAFVEHTPLSMQSLSKGLSYAESILGDTRGHGMSRAEVISDALRMDGMPFLARLKLSLSANGYDPDNPALRNTK	455	-	48157	48189	TGGAACCGCCTCGAGCAGAGGCTCCACTCATTG
Pseudomonas syringae	1	PlaA7386	PlaA7386|ALQ85_01365	Cluster_3994.1	Type III Effector	PlaA7386_Contig_16	+	172484	173536	1053	350	ATGTATATCCAGCAATCTGGCGCCCAATCAGGGGTTGCCGCTAAGACGCAACACGATAAGCCCTCGTCATTGTCCGGACTCGCCCCCGGTTCGTCGGATGCGTTCGCCCGTTTTCATCCCGAAAAGGCGGGCGCCTTTGTCCCATTGGAGGGGCATGAAGAGGTCTTTTTCGATGCGCGCTCTTCCTTTTCGTCGGTCGATGCCGCTGATCTTCCCAGTCCCGAGCAGGTACAACCCCAGCTTCATTCGTTGCGTACCCTGCTACCGGATCTGATGGTCTCTATCGCCTCATTACGTGACGGCGCCACGCAATACATCAAGACCAGAATCAAGGCTATGGCGGACAACAGCATAGGCGCGACTGCGAACATCGAAGCCAAAAGAAAGATTGCCCAAGAG…	MYIQQSGAQSGVAAKTQHDKPSSLSGLAPGSSDAFARFHPEKAGAFVPLEGHEEVFFDARSSFSSVDAADLPSPEQVQPQLHSLRTLLPDLMVSIASLRDGATQYIKTRIKAMADNSIGATANIEAKRKIAQEHGCQLVHPFHQSKFLFEKTIDDRAFAADYGRAGGDGHACLGLSVNWCQSRAKGQSDEAFFHKLEDYQGDALLPRVMGFQHIEQQAYSNKLQNAAPMLLDTLPKLGMTLGKGLGRAQHAHYAVALENLDRDLKAVLQPGKDQMLLFLSDSHAMALHQDSQGCLHFFDPLFGVVQADSFSNMSHFLADVFKRDVGTHWRGTEQRLQLSEMVPRADFHLR	524	+	171929	171960	GGGAACCGCATCACGTCTTGAACCACAGAGGA
Pseudomonas syringae	1	PlaA7386	PlaA7386|ALQ85_01376	Cluster_4702.2	Type III secretion related protein	PlaA7386_Contig_16	+	191721	192833	1113	370	ATGCAAGCACTTAACAGCATCAGTTCGTTGCAAACCTCTGCATCATTGTTCCCCGTGTCGCTCAACAGCGATGTGAGCGCCAACACCAGCACTTCCAGCAAAGAGCTCAAGGCTGTGATCGATCAGCTGGTTCAGGCGCTGACCCAAAGTGGGCAGCTCGATGAAACCTCACCGCTCGGCAAAATGCTCGCCAAGGCCATGGCTGCGGATGGCAAGTCGGCTAACAGCATCGATGACATCACTGCATCGCTCGACAAGCTGATCCACGAAAAGCTCGGCGACAATTTCGGTGCCTCTGCCGGCATCGGCGCGGGTGGCGGTGGCGGTGGCATTGGCGGGGCGGGTTCTGGTTCGGGTGTCGGTGGCGGTCTGAGCAGCGACGCGGGTGCCGGGCAATCC…	MQALNSISSLQTSASLFPVSLNSDVSANTSTSSKELKAVIDQLVQALTQSGQLDETSPLGKMLAKAMAADGKSANSIDDITASLDKLIHEKLGDNFGASAGIGAGGGGGGIGGAGSGSGVGGGLSSDAGAGQSDLMSQVLNGLGKAVLDDLLTPSGEGGTTFSSDDMPTLEKVAQFMDDNKAQFPTRDGGSWMNELKEDNGLDAQETAQFRSALDVIGQQLGQQQGDASGVTSGGGLGSPVSDSSLGNPAIDANTGPAANGNASVDVGQLIGQLIDRGLQSVSSGGGLGTPVDNSTQPTGGTPAANPTGNVSNQDLGQLLSGLLQRGLEATLQDAGNTGADLQSSAAQVAAQLINALLQGTNNQTNQAVA	442	+	191247	191279	TGGAACCGATTCGCAGGCTGCTGCCACCTAGTG
Pseudomonas syringae	1	PlaA7386	PlaA7386|ALQ85_01377	Cluster_28714.2	Type III secretion related protein	PlaA7386_Contig_16	+	192861	193235	375	124	GTGACCATTTCCCAACTCAGCAATTTGAAAAGTGTATCGCCGGAGCTTGGGCAGAATGCTCATCAGGGGCTCGGCTCCGAACCCGTTCAGGCGGATGTCGACCTATTCAATGCGGCGATGCGCCCTGACAGCGGGCCAGCAGCGTCGCACCTGTCCGACCGGATAGCCAGTGCGCTGTCCGAGCGGCTGGGCAGTACCGAGAAGCTTTCACAGCAAGCATTACGCCAGATGAAGAAAGTGTCGAACACCGAAGATCCTGGAGACATCGTGCAGATGAGTCGGGCGTTGTCGCAGTGCTCGTTGCAAATGGCGTTGACGACCAAGGTCGTGAGCAAGAGCGCTCAGGCGCTCGACAAGTTGACCAACCTGCAGTAG	MTISQLSNLKSVSPELGQNAHQGLGSEPVQADVDLFNAAMRPDSGPAASHLSDRIASALSERLGSTEKLSQQALRQMKKVSNTEDPGDIVQMSRALSQCSLQMALTTKVVSKSAQALDKLTNLQ	1582	+	191247	191279	TGGAACCGATTCGCAGGCTGCTGCCACCTAGTG
Pseudomonas syringae	1	PlaA7386	PlaA7386|ALQ85_01379	Cluster_2413.3	Type III secretion related protein	PlaA7386_Contig_16	+	194047	194577	531	176	ATGATGAGCCTTTCTGCCGAGGATCACTGGATTCACTGGTGGTGCAACCCCTGGCAGTGGGCACATTCGGAGTGGCATGACCGATTCGCCAACGCTCGTGGGTTATCGGTCAGTGACTGCGATGCGCTCATGGCCAGCCGTCATGGCGTGTTTCTGCAGAGTCTGGGCATTGACCCGGCTCAGCCGCCAGCGCCCGCGGAACCGGTGCTGCGCTGGTTGGCGCTGACGCCCTCGCAGCGTGAGCAGGCGCTAAGCCTGGCGCAGTGCATCTGCTTCTCCCGTAACGAAAGCGACGGCCCTGACGGTCAATGGTGCTGGGGGTTGACCAAAGCGCTGCGCCCCGGTGTCTGGCTGGAGTTTGAACACGAGGACGCGCGTCTTCTGCTGGGCGCCTGGCTT…	MMSLSAEDHWIHWWCNPWQWAHSEWHDRFANARGLSVSDCDALMASRHGVFLQSLGIDPAQPPAPAEPVLRWLALTPSQREQALSLAQCICFSRNESDGPDGQWCWGLTKALRPGVWLEFEHEDARLLLGAWLGPQYWSRLCLEWPPNEVPDTPGKAPENKLQALWQAIMWRVTAA	2768	+	191247	191279	TGGAACCGATTCGCAGGCTGCTGCCACCTAGTG
Pseudomonas syringae	1	PlaA7386	PlaA7386|ALQ85_01381	Cluster_49085.1	Type III secretion related protein	PlaA7386_Contig_16	+	195289	195513	225	74	ATGATCAGTTTCAACAGCTTGCAACGCCATCTCGACAACTCGGTGAGCCGTGCTCACACCAACATGGACCAGGCAGCGATGGAAGCCTCCGAGAGTGGCACCGTCGAAGACCTGCAGGCATTCAACGATGCCCAGCAGCAGGTCGATGTCGCCGGTATTGCCGTCAATGAATGCCTGCGTGCCAAGCACGGTATCAATAAAGCAGTCATCGATGGAATTCAGTGA	MISFNSLQRHLDNSVSRAHTNMDQAAMEASESGTVEDLQAFNDAQQQVDVAGIAVNECLRAKHGINKAVIDGIQ	30	+	195227	195259	TGGAACCGCTCGGCGGGTTTGCTCCACTCAAGG
Pseudomonas syringae	1	PlaA7386	PlaA7386|ALQ85_01389	Cluster_3403.1	Type III secretion related protein	PlaA7386_Contig_16	-	202967	203542	576	191	GTGACGATGACCGCACCGATCAAAACCCCGGCCAAAGCGCCACCAGCACCCCAGCGCCCTGCGCCTGTCGAGCGGCCAGCCACAGCTCTTAGCGAAAAACCATTCGGTGAAAAACGCCCTGCATCCGGTGGCCTGGGCCGTGGCGATGTACAGACCAGCCGTTCGGTACTGAGCAAGTCGCTGCAAGACACCCCGATGAGTGCCGACGGCATGTTCTTTTCGCAACTGCTGGTGCCGCCCGTAAGTGCCGAACCTGGTCAGCAAGGCTTTGGCGGGGGCGGTATAGCCTTTCCGGTACGCGCAGAACAAGTGCCGACCCAACTGATCGACGAGCTGGCGCAGCGCCTGCCGGATCAGCCTGACGGCCCCCTCAGTTTCACCCTGCTGATGCCCAACCTG…	MTMTAPIKTPAKAPPAPQRPAPVERPATALSEKPFGEKRPASGGLGRGDVQTSRSVLSKSLQDTPMSADGMFFSQLLVPPVSAEPGQQGFGGGGIAFPVRAEQVPTQLIDELAQRLPDQPDGPLSFTLLMPNLGSVRVNANKTENRWSVQLGFARRDVLKRLSAHTGACRDSLSQALGQDVELDMHEDLSA	6042	-	209584	209616	GGGAACTGATCCGGGACCGTGACCCACTCAGCG
Pseudomonas syringae	1	PlaA7386	PlaA7386|ALQ85_01394	Cluster_4852.1	Type III secretion related protein	PlaA7386_Contig_16	-	208451	209557	1107	368	ATGAAAATCGTCGCTCCGCCTATCATGCGAATACTTCCGGTCGCGCCGACCCGCGTCGTGACGCCTGCTGCGCAGCCACTTCCCAATGCTGATCTGCACAATTCAGGGACTTCGCCACAACAGGTTTCGCGCTTCGCGGCCGCGCTCATCCAGCACAGACGCATCCTCATTCAGCGCGACCTGATCGCCAGCAACAATGCCTTGCAGTCGCGAGCGGTGAAGCTCGGTGAGCTTTATCAACTGCTGATGACCGATCAGGACACCGGGCTGGATAACGCGGCCAGGGTATTGCGCAAAAAGCTCATGCAGGATGACTCTTCCTCAGATCTGAAACAGGTTCTGGATTACACCGACGGTGATGCCGCCAAGGCTCATGTGGTGTTGCAAGCCGCCAGGAAG…	MKIVAPPIMRILPVAPTRVVTPAAQPLPNADLHNSGTSPQQVSRFAAALIQHRRILIQRDLIASNNALQSRAVKLGELYQLLMTDQDTGLDNAARVLRKKLMQDDSSSDLKQVLDYTDGDAAKAHVVLQAARKQAEADGEMGEHVVLTQQLKQLRRKYGPRARAGINSAKAFARPNIDNKRRVALRNLYSVAVSGQPNITGLIEALLGEQQEAGQFNIDLRDMRTAIADDLSAMTPSASHEQLRTLMHGLNTARHVTTLLKGCEHLLGRMRNKNPDLTVDPPAFLKHLLTLTANGMNVNQTLQLTQHIGGKQLKHQLAFLNGLRPMLLQLPILLWRDMKSRQTALSNLLILMAELTTQEQKQLYGGLV	27	-	209584	209616	GGGAACTGATCCGGGACCGTGACCCACTCAGCG
Pseudomonas syringae	1	PlaA7386	PlaA7386|ALQ85_03858	Cluster_452.1	Type III Effector	PlaA7386_Contig_80	+	1319	7192	5874	1957	ATGGTCAAGGTTACCTCTTCCGGATTTACTGCCAACCCTCTCTCTCATCATGCGGACAGTGTTTCCCCCGCGAACAGTCCCCCTCAGTTACCGGAGCCTGTGCCTCTGGTTGATCTAAGCGAGTCGTCCCGCAAGGGCGGCATGCGAAATCGGCCGCATGCCAGTTTGAACAGTCAGGTGCTCGAACTGCAAGCGGTGCCGTCGCAACGTGGTAAGCATGTTCGTGTCAGAAGTCATGCCGATGGCGAGAGTGTCATTAATGCCTGGCTGGCAAAGCGCCCCTCGGTTCAAAGCGAAACCAGTCTTGATAACGATGGCAAACTGGTGCGTTACACCCCCGTGAATCATGAGCCGCTGGCGCCGCGCAATGAGGCGTTTTTCACCTCTGTGCCGGGGATG…	MVKVTSSGFTANPLSHHADSVSPANSPPQLPEPVPLVDLSESSRKGGMRNRPHASLNSQVLELQAVPSQRGKHVRVRSHADGESVINAWLAKRPSVQSETSLDNDGKLVRYTPVNHEPLAPRNEAFFTSVPGMLMAVLTVHPEMEHGISGDITADAVAARLAEPPIGLLTGIWQSSHDRAYLERGGVVHTANMEERWAPLTLPGINPREPLRMAGLQADGGVYLHNGSQLWRLTETAAESVTTENLPEGAAVRIGAGGEVHGLHEGALHSNGISRPIELWRPKAGAPGREQSPARPVDLLPLPGGPAALILDDKGRIYHADLKGTGAVEAHRLKLPADFAQGKGWAVTAMGLSRDDTVHLMLQDQNGRRMSLQRAPGEALFRPAYLLDRPLLLLYTEGL…	173	+	1115	1146	CGGAACCGATCCGGTTGCCTGGCCACTCAATT
Pseudomonas syringae	1	PlaA7386	PlaA7386|ALQ85_04271	Cluster_2093.1	Type III Effector	PlaA7386_Contig_97	-	411	1754	1344	447	ATGCATCGTCCTATCACCGCAGGCCATACCACCTCACGTCTCATCCTAGATCAGTCAAAACAAATATCACGTACCCCATCGGAAAGTAGCGCGCAATCAGCGCTTTCTCAGCAAGCAAGCATGAGCAGCCCAGTTTTGGAGCGGTCGAAAAGTGCGCCAGCTTTATTGACTGCGGCACAGCGCACGATGCTTGCACAAGTGGGAGCCTGTAACGCTCATCTGACCTCAGATGAAAACATGGCCATCAACGAACTGAGATCACACAAGCCCCTTTTACCTAAGGATACGTGGTTTTTCACTGATCCTAACAAGGACCCAGATGATGTCGTGACCTACACCTTGGGCAAGCAATTGCAGGCTGAGGGCTTTGTGCACATCACGGATGTAGTGGCGACACTG…	MHRPITAGHTTSRLILDQSKQISRTPSESSAQSALSQQASMSSPVLERSKSAPALLTAAQRTMLAQVGACNAHLTSDENMAINELRSHKPLLPKDTWFFTDPNKDPDDVVTYTLGKQLQAEGFVHITDVVATLGDAEVRSQRAEMAKGVFNKLELHDVHVSRGRDYAMNSLQSKEHAKFLLEGHALRAGPGEIHRDSLQDMSRRLARAPHGVGIVVIAGMSDINALITTCPDMVRERVDDITIMGGVEPLKDADGFVQPDARAYNNATDMDAARSLYRKAQELGIPLRIVTKEAAYKTAVSPSFYEGIAGSGHPVGHYLRDVQKSALKGLWEGIQAGLLPGLDDSWFFRTFMPNAQIEAAQLDKNKESSFEDIWPKVTKLNLYDPLTLLASVPGAAKLL…	28	-	1782	1814	TGAAACCGAAACGGCGTTGCTTGCCACACAGCA
Pseudomonas syringae	1	PlaA7386	PlaA7386|ALQ85_04336	Cluster_828.1	Type III Effector	PlaA7386_Contig_100	-	11405	14209	2805	934	TTGATTATCGGAACCACCGACCGTAGGGAAAATGCCATGATGCCATCTCAGATCACGCGCTCCTCTCATTCATCCTCGCCGGATGCCTCTCAACCGGCTTGCGATGCTGCAAGTAGCCTCGAGCAATCGCCGCAGCAGGTCCGCACCCGGGCGTTTGTCGCCAAAGGCAAACTGTCTGAGGCATTCGGGCGCACGTCTACTGCGCCGGCGCAGGATGCGGTGCACCTGCTGAACAATCTTCAGCGCGAGCTGGCGAAAGAGAATCCGTCTGGTCCCGAGCTTGCCCTGCTGGGCAAAGAGCTCGCCGCTGCCGCGATGACCGAGCAGGGCTCGCATCTGCTGGCCACCGAAGAACACCAGCACGTGTTGAAAGACGTGCTTGATCGTTGCATGCGCCAG…	MIIGTTDRRENAMMPSQITRSSHSSSPDASQPACDAASSLEQSPQQVRTRAFVAKGKLSEAFGRTSTAPAQDAVHLLNNLQRELAKENPSGPELALLGKELAAAAMTEQGSHLLATEEHQHVLKDVLDRCMRQLADTPASNASHVPLSQACEGLKTARLHQSLAMLTGTSHTQTRGVADLLALTQLDPKVLAEKLDGQAPYESFGHFIRTARDSTAALNVSLSDPAGETTGLLRAQADTLEALEKLPAILAALIEHCPDMPTQKDLRSLKDAAGELLTKLRESALLKGSEEIVSEAGESPVHGRESVEPALTRSQALLKAGGKLVRKFDAYGAVAPMDDKKLLALLRTPAPHLSPAQMHAFLNRYAIQLTDEQRTIVSNTALPPASEGDIEAQGGMGFD…	8	-	14217	14248	GGGAACCGTTCCGGATCGAGCGCCACTTAGCC
Pseudomonas syringae	1	PlaA7386	PlaA7386|ALQ85_05064	Cluster_406.2	Type III Effector	PlaA7386_Contig_40	+	26490	27356	867	288	CTGAGCCGATGGAGCCCGCTCATGACCTTAAGAATCAATACTCGTTCTGCTACCCCGGTTGTACCTCTGGAAACAGGCTCTACATCGCAGCCGACACCACCGCCGGTCACGGCAAGAGCGACTGAGCCTCCCCCCGTCGCCAATCCTGCGGCGCCTAAATCAGCGCCAGGTGTTCAGCAAGCACACGGGCTGAAGACGCGCATCGCTGGCAAGCTTTCCGAACGTCAGACCAATTTCAGTCTCGGGATTCCCGGCACTGGTCGTACTCTCAACCGGCCCTTGCGCAGCGGGATTCCGGAGGAAGGTGAGCAGGTATCGAACGAGGAGAGTCATGATCCGTTGCTCAAGGAAGCGCATGAACTGCAGCGTATGGTGGAGTCGGCGCTGACCCATCTGAAG…	MSRWSPLMTLRINTRSATPVVPLETGSTSQPTPPPVTARATEPPPVANPAAPKSAPGVQQAHGLKTRIAGKLSERQTNFSLGIPGTGRTLNRPLRSGIPEEGEQVSNEESHDPLLKEAHELQRMVESALTHLKAAPTSLWERPAPSTVRRITTKIFPWLKPAPLREVASNGSNAKTKIKIKINSQQSPETIAAAVKELSTRLDHQSKVLATATHALVAAREHLESLEQATPPSSTEPLDHARARVQQADSTTRLASQQLRELIQGTDVLQLGALSEGQDQVEQKAEFS	256	+	26203	26234	CGGAACCGAATCCATATTTCGACCACCCATCC
Pseudomonas syringae	1	PlaA7386	PlaA7386|ALQ85_05434	Cluster_49795.1	NA	PlaA7386_Contig_92	-	9004	9303	300	99	TTGGGCAAAATTCCCGGACACCAATCGCCGAGCTTTTCGATGATGATCTGTCCGATCACACCACCTTGCAGTTGGTATCCTATGACACTCTTTGAATACACCCAGACCTTCGTCCCCCTGCCCTATAAAACCGTGACCAGCGGCGTGCTGATGTTCAAGTCGACAGATGAGACGACCGAACCGGATATTCAAGGTTACTTAAGCAGCCCTGAGACTCTACGTATTGAACCGCTACGGTCGAGAGGGGTGGGAGCTGGTCAGCGTTCAGCCGATCAATCGTGGCCACGAACGATTTGGTAA	MGKIPGHQSPSFSMMICPITPPCSWYPMTLFEYTQTFVPLPYKTVTSGVLMFKSTDETTEPDIQGYLSSPETLRIEPLRSRGVGAGQRSADQSWPRTIW	25	-	9328	9360	TGGACCCGAATCCGTCTTAAACACCACTCAAGG
Pseudomonas syringae	1	PlaA7386	PlaA7386|ALQ85_101599	Cluster_16605.1	Type III Effector	PlaA7386_Contig_167	-	1131	2033	903	300	ATGATGATGAGAATACAAGGTGGTACGCCTTTTAGCATTCAACAGAACACAATGTCTGAGCATAACCCAGCTCAAGAGCAAGGGAGGTTTTCTTTCGGCGAGGAACGGGTTTCAATCAGCTCGCCTGTCGGCTCCCAAGCATCAGTGTCAACGGAACCCGCTGAAAACGCACGAGTTATGAGCGTCATGCTGAGCCCACAAAGGCCAAATGTAAAGAAAGCCGATCTTATTCCAGGCGATATTTTGCTTCTGATCGATGAGCCACATGATACCGAGAAGCTGCATAAAATTATTATTGCAGGCCAAAAACTTGAAGGTCTGTCTATGCTGAGGAATAATCTAGGTAAAGCCAGTGCGGTTCACGCAATATTGTGGACTCGAAATCCCCAAAATCCAGTT…	MMMRIQGGTPFSIQQNTMSEHNPAQEQGRFSFGEERVSISSPVGSQASVSTEPAENARVMSVMLSPQRPNVKKADLIPGDILLLIDEPHDTEKLHKIIIAGQKLEGLSMLRNNLGKASAVHAILWTRNPQNPVSTERGGKGESEVVEMRGGGIMDTALRKGLYQVYRPKDKNIGDWAAQSAMSWASERKIPYNAIKSAKSVTRFSNFGPLAIASAKKYGKDAFESNPKWGEDGAFCSHLVLAAYQAAAQNVGTPLSGALKVDAKGCSVRTLSHFLKKDTTQFEFTGHLRIKPDEVLFPED	132	-	2165	2197	TGGAACCGATCGAGGGGTTCTGACCACATAAGT
Pseudomonas syringae	1	PlaA7386	PlaA7386|ALQ85_102602	Cluster_24238.1	NA	PlaA7386_Contig_30	-	1082	1207	126	41	ATGCGAGTATCAAACTGTTCAGCACCTGTGATCAAAAATATCATTCAAACATGTGCCGCCCACTCCACCTTGAGCAGTGTCGCCATCAAACTCCAAGTATCACATTACAAACGGAAAGCAAACTAG	MRVSNCSAPVIKNIIQTCAAHSTLSSVAIKLQVSHYKRKAN	25	-	1232	1264	TGGAACCACTGAAGAGTTTTAAGCCACTCAGTA
Pseudomonas syringae	1	PlaA7386	PlaA7386|ALQ85_102708	Cluster_3432.1	Type III Effector	PlaA7386_Contig_100	-	2920	3783	864	287	ATTGGTATGAAAATATCCGGCTCCACATCGCCTGCACACACTTCAACGAATTCCGCGCAGAAGTCCTCTTCAAAAGAGCTGCTGAGTGGTTTGGCCAAGCATTTCAAGGGGATGCTCGTTTCTGGCAACACTTCTGGTCATTCGGCGCTCGGGCATTACGCGTCATCCAGCAGCGGCTCCAAAGGCAAGGCACCGGTACGGGACGATTACAGCAACGGACCGCAAACACGCCTTAACAACACACCTCTGAAACGAGCACTGGCCCGAGAGCTTGATCGCTTTGGCTACGGTTCATCGGCGACCGAGTCTTTTGACCGCTCATTGCAGCGTAAGGATAAAAATCCAGAGCTTGGTCACCTTGATGACGACGAGTACCTCGCTTTGCGCATGTACACAACG…	MGMKISGSTSPAHTSTNSAQKSSSKELLSGLAKHFKGMLVSGNTSGHSALGHYASSSSGSKGKAPVRDDYSNGPQTRLNNTPLKRALARELDRFGYGSSATESFDRSLQRKDKNPELGHLDDDEYLALRMYTTPFYRAVNHQLRDGKPSEDMKVVVEAMNKGLKRLAEHPDNVVKETLYRGINKVVDDKFIHKNFKLGEVYRDKTFVSATPDLSTVNATFTRHTVKSSKARHQHLCINAVHYWRLRAVLQYASGKFRCRVLKRKGFLRLILPFWWRTRAGQTREGGI	510	-	4293	4324	TGGAACCGGACGAGGCTTTTTACCACTCAATG
Pseudomonas syringae	1	PlaA7386	PlaA7386|ALQ85_200072	Cluster_2594.1	Type III Effector	PlaA7386_Contig_139	-	3124	3780	657	218	ATGATCACTCCGTCTCGATATCCAGGCATCTATATCGCCCCCCTCAGTAACGAACCGACAGCAGCTCACACATTTAAAGAACAAGCAGAGGAAGCACTTGACCATATCAGCGCCGCACCCTCTGGCGATAAGCTATTGCGAAAAATATCCACTCTTGCCAGTCAAAAAGATAGAAAAGTCACGCTAAAAGAGATTGAAATAAATAACCAGTGTTATACCGAAGCTGTTCTAAGCAGGAGGCAACTGGAAAAGTACGAACCAGAAAACTTTAACGAGAACCGGCACATTGCATCACAGCTATCACGAAAGGGGACCTTTACCAAAGGTGAAGGAAGCAACGCGATTATTGGCTGGTCACCAGACAAAGCAAGCATACGCTTAAATCAGAATGGCTCACCG…	MITPSRYPGIYIAPLSNEPTAAHTFKEQAEEALDHISAAPSGDKLLRKISTLASQKDRKVTLKEIEINNQCYTEAVLSRRQLEKYEPENFNENRHIASQLSRKGTFTKGEGSNAIIGWSPDKASIRLNQNGSPLHLGMDNDDKITTLAHELVHARHVLGGSSLADGGDRYNPRTGSGKEELRAVGLDKYRYSLTKKPSENSIRAEHGLPLRMKYRAHQ	180	-	3960	3992	TGGAACCGAATCCATCTCGAGGGCCACTCAAGG
Pseudomonas syringae	1	Pma4981	Pma4981|ALQ72_00340	Cluster_3432.1	Type III Effector	Pma4981_Contig_115	-	154	1011	858	285	ATGAAAATATCCGGCTCCACATCGCCTGCACACACTTCAACGAATTCCGCGCAGAAGTCCTCTTCAAAAGGGCTGCTGAGTGGTTTGGCCAAGCATTTCAAGGGGATGCTCGTTTCTGGCAACACTTCTGGTCATTCGGCGCTCGGGCATTACGCGTCATCCAGCAGCGGCTCCAAAGGCAAGGCACCGGTACGGGACGATTACAGCAACGGACCGCAAACACGCCTTAACAACACACCTCTGAAACGAGCACTGGCCCGAGAGCTTGATCGCTTTGGCTACGGTTCATCGGCGACCGAGTCTTTTGACCGCTCATTGCAGCGTAAGGATAAAAATCCAGAGCTTGGTCACCTTGATGACGACGAGTACCTCGCTTTGCGCATGTACACAACGCCGTTT…	MKISGSTSPAHTSTNSAQKSSSKGLLSGLAKHFKGMLVSGNTSGHSALGHYASSSSGSKGKAPVRDDYSNGPQTRLNNTPLKRALARELDRFGYGSSATESFDRSLQRKDKNPELGHLDDDEYLALRMYTTPFYRAVNHQLRDGKPSEDMKVVVEAMNKGLKRLAEHPDNVVKETLYRGINKVVDDKFIHKNFKLGEVYRDKTFVSATPDLSTVNATFTRHTVKSSKARHQHLCINAVHYWRLRAVLQYASGKFRCRVLKRKGFLRLILPFWWRTRAGQTREGGI	516	-	1527	1558	TGGAACCGGACGAGGCTTTTTACCACTCAATG
Pseudomonas syringae	1	Pma4981	Pma4981|ALQ72_00717	Cluster_4422.1	Type III secretion related protein	Pma4981_Contig_13	+	57573	58442	870	289	ATGACCATGGGTGTTTCACCTATTCGTAACTCAAACTCCCTACCGATCGATTTTTCGTCGTTGAGCGCAAAGAGTGGCGGGCATAACGGGCTGGGCAGCGGAGACAATTCGACTATCGACCCGAGTACGTTGTTGTTCGGCAATCAAGGGCAGACGCAGGTCAATTTCGCTCCGCCCAACAGCACGGACTCCTCAACCAGCGGTGTGAACGCTGCGTCAGGCAATACGGCGTCCGGCCTGGTCGAGCAAATCATGAGCCTGCTGAAACAATTGATGCAGATGCTGATGCAAAACAACAATGCTTCCGGTAACCCTCAGACTGATTCGTCAACGCCAGGCGTCGGCAGTGGCAACAGCGTCGGGAGCGGCGGTACTGGAAGCAGTCTCGCAGGCAGTGAC…	MTMGVSPIRNSNSLPIDFSSLSAKSGGHNGLGSGDNSTIDPSTLLFGNQGQTQVNFAPPNSTDSSTSGVNAASGNTASGLVEQIMSLLKQLMQMLMQNNNASGNPQTDSSTPGVGSGNSVGSGGTGSSLAGSDGGDETSGVGNGGLGDAGSTPTTSAADGVPSDTSLTGSGGLHLPQQLEQYRGDIMDAAKATGVPPSVIAGQIWAESRGQLNAATTNVNGKADAGLMQVNADTFKSLQQQNPGVAGQRRQRFAHQHHGGRALPARPEQGVRRHGGSTSRIQLRARQGQ	89	+	57453	57484	GGGAACCGAGTCACTCAGTGAACCACTCAGTT
Pseudomonas syringae	1	Pma4981	Pma4981|ALQ72_00847	Cluster_6364.1	Type III Effector	Pma4981_Contig_132	+	23320	24462	1143	380	ATGAACCCCATTCAGTCACGCTTCTCCAGTGTGCAAGAGCTCAGACGATCCAACGTTGATATTCCGGCGCTCAAAGCCAATGGCCAACTGGAGGTCGACGGCAAGAGGTACGAGATTCGTGCAGCCGATGACGGAACAATTTCGGTCCTTCGACCGGAGCAACAATCCAAAGCGAAAAGTTTTTTCAAGGGCGCTTCTCAGTTGATAGGTGGCAGCAGCCAGCGCGCGCAGATTGCCCAGGCGCTCAACGAGAAAGTCGTATCGGCACGCACTGTCTTGCACCAGGGCGCTGTGACGGGCGGACGCCTGGACACCCTTGAGCGGGGCGAAAGCAGCTCAGCCACAACAGCCATCAAACCCACTGCCAAACAGGCTGCGCAAAATACTTTTAACAGCTTT…	MNPIQSRFSSVQELRRSNVDIPALKANGQLEVDGKRYEIRAADDGTISVLRPEQQSKAKSFFKGASQLIGGSSQRAQIAQALNEKVVSARTVLHQGAVTGGRLDTLERGESSSATTAIKPTAKQAAQNTFNSFHEWAKQAEAMRNPSRMDIYKIYKQDAPHSHPMSNEQQEEFLHTLKALNGKNGIEVRTQDHDSVRNKKDRNLDKYIAESPDAKRFFYRIIPKHERREDKHQGRLTIGVQPQYATQLTRAMATLIGKESAITHGKVIGPACHGQMTDSAVLYINGDVAKAEKLGEKLKQMSGIPLDAFVEHTPLSMQSLSKGLSYAESILGDTRGHGMSRAEVISDALRMDGMPFLARLKLSLSANGYDPDNPALRNTK	455	+	22833	22865	TGGAACCGCCTCGAGCAGAGGCTCCACTCATTG
Pseudomonas syringae	1	Pma4981	Pma4981|ALQ72_01367	Cluster_406.2	Type III Effector	Pma4981_Contig_16	+	28210	29412	1203	400	ATGACCTTAAGAATCAATACTCGTTCTGCTACCCCGGTTGTACCTCTGGAAACAGGCTCTACATCGCAGCCGACACCACCGCCGGTCACGGCAAGAGCGACTGAGCCTCCCCCCGTCGCCAATCCTGCGGCGCCTAAATCAGCGCCAGGTGTTCAGCAAGCACACGGGCTGAAGACGCGCATCGCTGGCAAGCTTTCCGAACGTCAGACCAATTTCAGTCTCGGGATTCCCGGCACTGGTCGTACTCTCAACCGGCCCTTGCGCAGCGGGATTCCGGAGGAAGGTGAGCAGGTATCGAACGAGGAGAGTCATGATCCGTTGCTCAAGGAAGCGCATGAACTGCAGCGCATGGTGGAGTCGGCGCTGACCCATCTGAAGGCGGCACCGACGTCTCTCTGG…	MTLRINTRSATPVVPLETGSTSQPTPPPVTARATEPPPVANPAAPKSAPGVQQAHGLKTRIAGKLSERQTNFSLGIPGTGRTLNRPLRSGIPEEGEQVSNEESHDPLLKEAHELQRMVESALTHLKAAPTSLWERPAPSTVRRITTKVFPWLKPAPLREVASNGSNAKIKINSQQSPETIAAAVKELSTRLDHQSKVLATATHALVAAREHLESLEQATPPSSTERLDHARARVQQADSTTRLASQQLRELIQGTEVLQLGALSEGQDQVEQKAEFSQQWLSELRTRMQAVDVRFADRHAAIEIELQLKVAQTRELISLDHDMTAAEHTAAQANTQLSALRAQRQETPEGSDEADRLDTAIRQTLATRSQAMQTHQQLAKKLVRVDADVARLNDELGEIH	277	+	27902	27933	CGGAACCGAATCCATATTTCGACCACCCATCC
Pseudomonas syringae	1	Pma4981	Pma4981|ALQ72_01425	Cluster2_1312.1	Type III Effector	Pma4981_Contig_168	+	598	2403	1806	601	TTGATTAATAACGAGCTGACGGTTCAGGCCCGATTAAATGATCAATCGGAGTACGACATCGTCAGCGCACATTTGCATGGCTCTTCGAAAGCCATATCCTTCGACGTACCCAGCCCCCCGCCCGCACATGGTTCAGCATCTTCTGTCTTGAGTGAACGGACCCATCTAGGTATGAGTCGCGTTCTCTCACAAGATGCAGTAGACAGCAGTAGCCTGGAAACTCCGTTACTGAGCTCGCCAGACCATTCTCGTCCGCCATCACAGCCAAAGCCCGTGCATATCGGGTCGGTCCGCAGGGACTCTGGTAGCCTTGTTTCCGATAACCCGGTAGTGCAGGCCCTGCTATCGTTTGCGCAGGCCGACCAGGCATTTCCACCACAGGCCGCGAGCATTGCCGGG…	MINNELTVQARLNDQSEYDIVSAHLHGSSKAISFDVPSPPPAHGSASSVLSERTHLGMSRVLSQDAVDSSSLETPLLSSPDHSRPPSQPKPVHIGSVRRDSGSLVSDNPVVQALLSFAQADQAFPPQAASIAGVQLEMRPRRDIEKALEEFKGAFTVVKAQLMSGANSSERVDEDVNADIHIPLLLKAIERGAAAFGPNASIGQNSAKAFLASCAPKITSNDDVLSEFINQKLKGDDDLQVRLGAQELLHVATKKEFQLGGLAGSIGVSSILGSAWELGASELLKNAIFGKNFSPSQYALQLAGIDSVPPLIIESMDTMCVLAIIKGMKGEEWSMSDLLPKALKAGAISSVVSFPNNVLQYAGFKSRVGDLAANSVTTEAAIFGAASGIPPEVKESEEL…	349	+	218	249	TGGAACCCAAGAGCCCTTGCGACCACACATTG
Pseudomonas syringae	1	Pma4981	Pma4981|ALQ72_01426	Cluster_2093.1	Type III Effector	Pma4981_Contig_168	-	2519	3862	1344	447	ATGCATCGTCCTATCACCGCAGGCCATACCACCTCACGTCTCATCCTAGATCAGTCAAAACAAATATCACGTACCCCATCGGAAAGTAGCGCGCAATCAGCGCTTTCTCAGCAAGCAAGCATGAGCAGCCCAGTTTTGGAGCGGTCGAAAAGTGCGCCAGCTTTATTGACTGCGGCACAGCGCACGATGCTTGCACAAGTGGGAGCCTGTAACGCTCATCTGACCTCAGATGAAAACATGGCCATCAACGAACTGAGATCACACAAGCCCCTTTTACCTAAGGATACGTGGTTTTTCACTGATCCTAACAAGGACCCAGATGATGTCGTGACCTACACCTTGGGCAAGCAATTGCAGGCTGAGGGCTTTGTGCACATCACGGATGTAGTGGCGACACTG…	MHRPITAGHTTSRLILDQSKQISRTPSESSAQSALSQQASMSSPVLERSKSAPALLTAAQRTMLAQVGACNAHLTSDENMAINELRSHKPLLPKDTWFFTDPNKDPDDVVTYTLGKQLQAEGFVHITDVVATLGDAEVRSQRAEMAKGVFNKLELHDVHVSRGRDYAMNSLQSKEHAKFLLEGHALRAGPGEIHRDSLQDMSRRLARAPHGVGIVVIAGMSDINALITTCPDMVRERVDDITIMGGVEPLKDADGFVQPDARAYNNATDMDAARSLYRKAQELGIPLRIVTKEAAYKTAVSPSFYEGIAGSGHPVGHYLRDVQKSALKGLWEGIQAGLLPGLDDSWFFRTFMPNAQIEAAQLDKNKESSFEDIWPKVTKLNLYDPLTLLASVPGAAKLL…	28	-	3890	3922	TGAAACCGAAACGGCGTTGCTTGCCACACAGCA
Pseudomonas syringae	1	Pma4981	Pma4981|ALQ72_01902	Cluster_72252.1	NA	Pma4981_Contig_193	-	6376	6714	339	112	ATGCACCGCACCATGAAACAAGCTGTAGCCAACGTTTTGCCAAACAGCATTCCTGAGGAGGTCATGCAAGCCAGTGCGATCGATTGGGAGGTAATTGTTGATGCATATCTTCTGGGGGCGGCGTTTGTAGGGGGCTGCTATGCCGCCCGTGCGTTTCTAGATCGTTCTGGAGCGATTAACGACGGCATGACTGTAGTTACTCCCAGGGTGGCAGTGATGGCCGAGAGAGGCAGTTTTCTGCTCGTCCAAAGTCTGAGTGGTCAAGATCACTACGTTATTGTCAGCCATCACGATCCAGTCAGGGGGGAAGTGTCCGATGGATGCGGAAGTTCCCGATGA	MHRTMKQAVANVLPNSIPEEVMQASAIDWEVIVDAYLLGAAFVGGCYAARAFLDRSGAINDGMTVVTPRVAVMAERGSFLLVQSLSGQDHYVIVSHHDPVRGEVSDGCGSSR	797	-	7511	7540	AAAGCGTTCATGGCTGATGGCCACTCAGGT
Pseudomonas syringae	1	Pma4981	Pma4981|ALQ72_03394	Cluster_10_1020.1	Type III Effector	Pma4981_Contig_321	+	395	1030	636	211	ATGAATAGAGTTTCCGGTAGCTCGTCAGCGACTTGGCAGGCAGTCAACGATCTTGTGGAGCAAGTAAGCGAGAGAACCACGTTGTCTACGACAGGTTATCAGACGGCAATGGGCCGCTTGAACAAACCGGAAAAATCAGATGCGGATGCGCTGATGACTATGAGGAGGGCGCAACAGTACACGGATAGCGCGAAGCGAACTTATATTTCGGAAACGCTGATGAATCTGGCAGATTTGCAGCAAAGGAAAATCTATCGCACCAACAGCGGGAACTTGCGTGGCGCGATTGAGATGACGCCTACGCAACTCACAGATTGCGTACAGAAGTGCCGCGAAGAGGGGTTCTCCAATTGTGACATACAGGCGCTGGAAATCGGCTTGCACCTTCGACATAAGTTA…	MNRVSGSSSATWQAVNDLVEQVSERTTLSTTGYQTAMGRLNKPEKSDADALMTMRRAQQYTDSAKRTYISETLMNLADLQQRKIYRTNSGNLRGAIEMTPTQLTDCVQKCREEGFSNCDIQALEIGLHLRHKLGISDFTIYSNRKLSHNYVVIHPSNAFPKGAIVDSWTGQGVVELDFKTRLKFKHREENYAVNANMHEWIERYGQAHVID	38	+	325	357	TGGAACCGAATCCGCCTCAAAGTCCACACAAGC
Pseudomonas syringae	1	Pma4981	Pma4981|ALQ72_03688	Cluster_2594.1	Type III Effector	Pma4981_Contig_39	+	230	886	657	218	ATGATCACTCCGTCTCGATATCCAGGCATCTATATCGCCCCCCTCAGTAACGAACCGACAGCAGCTCACACATTTAAAGAACAAGCAGAGGAAGCACTTGACCATATCAGCGCCGCACCCTCTGGCGATAAGCTATTGCGAAAAATATCCACTCTTGCCAGTCAAAAAGATAGAAAAGTCACGCTAAAAGAGATTGAAATAAATAACCAGTGTTATACCGAAGCTGTTCTGAGCAGGAGGCAACTGGAAAAGTACGAACCAGAAAACTTTAACGAGAACCGGCACATTGCATCACAGCTATCACGAAAGGGGACCTTTACCAAAGGTGAAGGAAGCAACGCGATTATTGGCTGGTCACCAGACAAAGCAAGCATACGCTTAAATCAGAATGGCTCACCG…	MITPSRYPGIYIAPLSNEPTAAHTFKEQAEEALDHISAAPSGDKLLRKISTLASQKDRKVTLKEIEINNQCYTEAVLSRRQLEKYEPENFNENRHIASQLSRKGTFTKGEGSNAIIGWSPDKASIRLNQNGSPLHLGMDNDDKITTLAHELVHARHVLGGSSLADGGDRYNPRTGSGKEELRAVGLDKYRYSLTKKPSENSIRAEHGLPLRMKYRAHQ	180	+	18	50	TGGAACCGAATCCATCTCGAGGGCCACTCAAGG
Pseudomonas syringae	1	Pma4981	Pma4981|ALQ72_04225	Cluster_12725.1	Type III Effector	Pma4981_Contig_55	+	1461	2477	1017	338	ATGCAGAACCATGTCATTATTTCCAGAGGCGCCACACCATTGTCGGGAAGGGTTACAGCCAGCGATGTCAAACCTGCCTATGCGCAATTGACACCCGAAGCTTATCGACACGCGATAACGAAATTCAAACAAGCATTGACCACTCCGGAGCGGCCAACCGGCGAACCCGTTTTCATCTACGACCGTACACCAGGCGAACTGGAAAATTTTCGTTCTTCGGACAGTTTTATTCTTCCTAATCACCTCAGTCAAAAAGGCTGGGACACGCTACACATTTCCGGCAGTGCCAGTATCGCCAGTTTGGAGCAAGTGCAACGCTTGCATCCTACCCCCGAAAGACCCGTCGTGGTATTGGATGTACGAGAAGAATCTCACGCGATCGTTGGGGGCTATCCATGT…	MQNHVIISRGATPLSGRVTASDVKPAYAQLTPEAYRHAITKFKQALTTPERPTGEPVFIYDRTPGELENFRSSDSFILPNHLSQKGWDTLHISGSASIASLEQVQRLHPTPERPVVVLDVREESHAIVGGYPCTWRLGNNWANVGKSRNAVIADEQSRIAALKQQPTVEIIHRKDAKHGQENPRKVVLKNPDISSEEDLVKSTGAEYLRLMVTDHMGPRSEDIDLFVAMERALPEHGRVHIHCGVGQGRTGIFIAMHDMLKNAHHVSFHDLIERQLAFNPGRALDFNKDVTHEGRANLRNDRLEFISLFYEYAKQNPKGAPRSWSEWLADPNTPFQQR	28	+	1402	1433	TGGAACCGTTAGAGCATATGCACCACGAAGGA
Pseudomonas syringae	1	Pma4981	Pma4981|ALQ72_05134	Cluster_2333.2	Type III Effector	Pma4981_Contig_82	+	23377	24240	864	287	ATGAACATTACGCCGCTCACGTCAGCCGCGGGCAAGGGCTCGTCCGCACAAGGCACAGACAAAATTTCCATTCCCAACTCCACGCGCATGATCAATGCCGCTTCAATCAAGTGGTTGAATAAGGTGCGTAGCGCCATCAGTGACCACATCCGCACCAGCATCGAGAAAGGGAAACTGTTCGAGCTCGCCTCCTTGGGCAGCAACATGTTCGGTGTCCCGGCTCTTTCAGCGCGCCCCTCGACGCTCCAACCTGTGTTGGCGTTTGAGGCTGACCCCAATCACGACCTGAACCTTGTCAGGGTCTATATGCAGGACAGCGCCGGCAAGCTCACTCCCTGGGACCCGACGCCCAACGCGGTCACGACGACGTCGAATCCATCAGAGCCTGATGCGCAGAGC…	MNITPLTSAAGKGSSAQGTDKISIPNSTRMINAASIKWLNKVRSAISDHIRTSIEKGKLFELASLGSNMFGVPALSARPSTLQPVLAFEADPNHDLNLVRVYMQDSAGKLTPWDPTPNAVTTTSNPSEPDAQSDTASSSLPRRPPAGSVLSLLGIALDHAQRHSPRADRSAKGRPGREERNGARFNAKQTKPTEAEAYGDHQTPNPDLHRQKETAQRVAESINSMREQQNGMQRAEGLLRAKEALQAREAARKQLLDVLEAIQAGREDSTDKKISATEKNATGINYQ	22	+	23324	23355	AGGAACTCATCACCGCGAATCGCCACTCAGCA
Pseudomonas syringae	1	Pma4981	Pma4981|ALQ72_05284	Cluster_4852.1	Type III secretion related protein	Pma4981_Contig_88	+	4839	5945	1107	368	ATGAAAATCGTCGCTCCGCCTATCATGCGAATACTTCCGGTCGCGCCGACCCGCGTCGTGACGCCTGCTGCGCAGCCACTTCCCAACGCTGATCTGCACAATTCAGGGACTTCGCCACAACAGGTTTCGCGCTTCGCGGCCGCGCTCATCCAGCACAGACGCATCCTCATTCAGCGCGACCTGATCGCCAGCAACAATGCCTTGCAGTCGCGAGCGGTGAAGCTCGGTGAGCTTTATCAACTGCTGATGACCGATCAGGACACCGGGCTGGATAACGCGGCCAGGGTATTGCGCAAAAAGCTCATGCAGGACGACTCGTCCTCAGATCTGAAACAGGTTCTGGATTACACCGACGGTGATGCCGCCAAGGCTCATGTGGTGTTGCAAGCCGCCAGAAAG…	MKIVAPPIMRILPVAPTRVVTPAAQPLPNADLHNSGTSPQQVSRFAAALIQHRRILIQRDLIASNNALQSRAVKLGELYQLLMTDQDTGLDNAARVLRKKLMQDDSSSDLKQVLDYTDGDAAKAHVVLQAARKQAEADGEMGEHVVLTQQLKQLRRKYGPRARAGINSAKAFARPNIDNKRRVALRNLYSVAVSGQPNITGLIEALLGEQQEAGQFNIDLRDMRTAIADDLSAMTPSASHEQLRTLMHGLNTARHVTTLLKGCEHLLGRMRNKNPDLTVDPPAFLKHLLTLTANGMNVNQTLQLTQHIGGKQLKHQLAFLNGLRPMLLQLPILLWRDMKSRQTALSNLLILMAELTTQEQKQLYGGLV	27	+	4780	4812	GGGAACTGATCCGGGACCGTGACCCACTCAGCG
Pseudomonas syringae	1	Pma4981	Pma4981|ALQ72_05289	Cluster_3403.1	Type III secretion related protein	Pma4981_Contig_88	+	10854	11429	576	191	GTGACGATGACCGCACCGATCAAAACCCCGGCCAAAGCGCCACCAGCCCCCCAGCGCCCTGCGCCTGTCGAGCGGCCAGCCACAACTCTCAGTGAAAAACCATTCGGTGAAAAACGCCCTGCATTCGGCGGCTTGGGCCGTGGCGACATACAGGCCAGCCGTTCGGCGCTGAGCAAGGCGCTGCAAGACACCCCGGTGAGTGCCGACGGCATGTTCTTTTCGCAACTGCTGGTGCCGCCCGTCAGTGCCGAACCTGATCAGCAAGGCTTTGGCGGGGGCGGTATTGCCTTTCCGGTGCGCGCAGAACAAGTGCCGACCCAACTGATCGACGAGCTGGCGCAGCGCCTGCCGGATCAACCTGACGGCCCCCTCAGCTTCACCCTGCTGATGCCCAGCCTG…	MTMTAPIKTPAKAPPAPQRPAPVERPATTLSEKPFGEKRPAFGGLGRGDIQASRSALSKALQDTPVSADGMFFSQLLVPPVSAEPDQQGFGGGGIAFPVRAEQVPTQLIDELAQRLPDQPDGPLSFTLLMPSLGSVRVNANKTENRWSVQLGFARRDVLKRLSAHTGACRDSLSQALGQDVELDMHEDLSA	6042	+	4780	4812	GGGAACTGATCCGGGACCGTGACCCACTCAGCG
Pseudomonas syringae	1	Pma4981	Pma4981|ALQ72_05296	Cluster_18957.1	Type III secretion related protein	Pma4981_Contig_88	-	15888	16247	360	119	ATGATTGAGGTAACGGAAAAGTCGGCATTTTACGCTCAGGTTGCCGCCCAGAGCCCAGCAGTATGGCCAGTGGCCAATGGCGTCGCGTTTGTCAGTCGGCGCGAACACCATGATTGGGGGATCGCCTTGCACATAGAAGGCCGCGCGTTGCGTCCCGATCAACTGCGTGATGCACTGCAACGACGTTTTATGGAGTCAGAGCGTTTCAATCACTACTTCCTGTTTCTGGACGTACGACGCGACTTTGTGGTGTGGCACGCGGTCAACGAAAAACCGGGTTCCTACGCCAGCCTGGACGACATCCGCCGGCATGAGTTGATGCTGGCAGGGCTGGACCATTTGAGCGAGGAAATGCACTGA	MIEVTEKSAFYAQVAAQSPAVWPVANGVAFVSRREHHDWGIALHIEGRALRPDQLRDALQRRFMESERFNHYFLFLDVRRDFVVWHAVNEKPGSYASLDDIRRHELMLAGLDHLSEEMH	2976	-	19223	19255	TGGAACCGCTCGGCGGGTTTGCTCCACTCAAGG
Pseudomonas syringae	1	Pma4981	Pma4981|ALQ72_05300	Cluster_49085.1	Type III secretion related protein	Pma4981_Contig_88	-	18969	19193	225	74	ATGATCAGTTTCAACAGCTTGCAACGCCATCTCGACAATTCGGTGAGCCGTGCTCACACCAACATGGACCAGGCAGCGATGGAAGCCTCCGAGAGTGGCACCGTCGAAGACCTGCAGGCATTCAACGATGCCCAGCAGCAGGTCGATGTCGCCGGTATTGCCGTCAATGAATGCCTGCGTGCCAAGCACGGTATCAATAAAGCAGTCATCGATGGAATTCAGTGA	MISFNSLQRHLDNSVSRAHTNMDQAAMEASESGTVEDLQAFNDAQQQVDVAGIAVNECLRAKHGINKAVIDGIQ	30	-	19223	19255	TGGAACCGCTCGGCGGGTTTGCTCCACTCAAGG
Pseudomonas syringae	1	Pma4981	Pma4981|ALQ72_05312	Cluster_3390.1	Type III Effector	Pma4981_Contig_88	-	33840	35978	2139	712	ATGATCAGTTCGCGGATCGGCGGGGCCGGTGGCGTCGAACTCAGCCGGGTAAACCAGCAGCACGATACTGTTCCCGCCCAGACAGCTCACCCAAATGCAGTCACTGCAGGCATGAATCCGCCGCTGACTCCCGATCAGTCAGGGTCACACGCGACAGAAAGCTCGTCTGCCGGCGCGGCGCGGCTGAATGTCGCGGCTCGACACACACAGCTTTTGCAGGCCTTCAAGGCTGAGCATGGGACGGCTCCGGTCAGCGGCGCGCCGATGATCAGTTCGCGTGCTGCGTTGTTGATCGGTAGTCTGCTGCAGGCCGAGCCTTTGCCTTTTGAAGTCATGGCCGAGAAATTGTCTCCTGAGCGCTATCAACTGAAGCAGTTTCAGGGCTCGGACTTGCAGCAG…	MISSRIGGAGGVELSRVNQQHDTVPAQTAHPNAVTAGMNPPLTPDQSGSHATESSSAGAARLNVAARHTQLLQAFKAEHGTAPVSGAPMISSRAALLIGSLLQAEPLPFEVMAEKLSPERYQLKQFQGSDLQQRLEKFAQPGQIPDKAEVGQLIKGFAQSVADQLEHFQLMHDASPATVGQHAKADKATLAVSQTALGEYAGRASKAIGEGLSNSIASLDEHISALDLTLQDAEQGNKESLHADRQALVDAKTTLVGLHADFVKSPEAKRLASVAAHTQLDNVVSDLVTARNTVGGWKGAGPIVAAAVPQFLSSMTHLGYVRLSTSDKLRDTIPETSSDANMLKASIIGMVAGIAHETVNSVVKPMFQAALQKTGLNERLNMVPMKAVDTNTVIPDPFE…	548	-	36526	36558	AGGAACTGAAATGCCTATGCCTGCGACTCAGTG
Pseudomonas syringae	1	Pma4981	Pma4981|ALQ72_05314	Cluster_4528.1	Type III secretion related protein	Pma4981_Contig_88	+	36775	38049	1275	424	ATGAGCATCGGCATCACACCCCGGCCGCAACAGACCACCACGCCACTCGATTTTTCGGCGCTAAGCGGCAAGAGTCCTCAACCAAACACGTTCGGCGAGCAGAACACTCAGCAAGCGATCGACCCGAGTGCACTGTTGTTCGGCAGCGACACACAGAAAGACGTCAACTTCGGCACGCCCGACAGCACCGTCCAGAATCCGCAGGACGCCAGCAAGCCCAACGACAGCCAGTCCAACATCGCTAAATTGATCAGTGCATTGATCATGTCGTTGCTGCAGATGCTCACCAACTCCAATAAAAAGCAGGACACCAATCAGGAACAGCCTGATAGCCAGGCTCCTTTCCAGAACAACGGCGGGCTCGGTACACCGTCGGCCGATAGCGGGGGCGGCGGTACA…	MSIGITPRPQQTTTPLDFSALSGKSPQPNTFGEQNTQQAIDPSALLFGSDTQKDVNFGTPDSTVQNPQDASKPNDSQSNIAKLISALIMSLLQMLTNSNKKQDTNQEQPDSQAPFQNNGGLGTPSADSGGGGTPDATGGGGGDTPSATGGGGGDTPTATGGGGSGGGGTPTATGGGSGGTPTATGGGEGGVTPQITPQLANPNRTSGTGSVSDTAGSTEQAGKINVVKDTIKVGAGEVFDGHGATFTADKSMGNGDQGENQKPMFELAEGATLKNVNLGENEVDGIHVKAKNAQEVTIDNVHAQNVGEDLITVKGEGGAAVTNLNIKNSSAKGADDKVVQLNANTHLKIDNFKADDFGTMVRTNGGKQFDDMSIELNGIEANHGKFALVKSDSDDLKLA…	122	+	36623	36653	GGGAACCGGTCGCTGCGCTTTGCCACTCACT
Pseudomonas syringae	1	Pma4981	Pma4981|ALQ72_05317	Cluster_3994.1	Type III Effector	Pma4981_Contig_88	-	40946	41998	1053	350	ATGTATATCCAGCAATCTGGCGCCCAATCAGGGGTTGCCGCTAAGACGCAACACGATCAGCCCTCGTCATTGTCCGGACTCGCCCCCGGTTCGTCGGATGCGTTCGCCCGTTTTCATCCCGAAAAGGCGGGCGCCTTTGTCCCATTGGAGGGGCATGAAGAGGTCTTTTTCGATGCGCGCTCTTCCTTTTCGTCGGTCGATGCCGCTGATCTTCCCAGTCCCGAGCAGGTACAACCCCAGCTTCATTCGTTGCGTACCCTGCTACCGGATCTGATGGTCTCTATCGCCTCATTACGTGACGGCGCCACGCAATACATCAAGACCAGAATCAAGGCTATGGCGGACAACAGCATAGGCGCGACTGCGAACATCGAAGCCAAAAGAAAGATTGCCCAAGAG…	MYIQQSGAQSGVAAKTQHDQPSSLSGLAPGSSDAFARFHPEKAGAFVPLEGHEEVFFDARSSFSSVDAADLPSPEQVQPQLHSLRTLLPDLMVSIASLRDGATQYIKTRIKAMADNSIGATANIEAKRKIAQEHGCQLVHPFHQSKFLFEKTIDDRAFAADYGRAGGDGHACLGLSVNWCQSRAKGQSDEAFFHKLEDYQGDALLPRVMGFQHIEQQAYSNKLQNAAPMLLDTLPKLGMTLGKGLGRAQHAHYAVALENLDRDLKAVLQPGKDQMLLFLSDSHAMALHQDSQGCLHFFDPLFGVVQADSFSNMSHFLADVFKRDVGTHWRGTEQRLQLSEMVPRADFHLR	524	-	42522	42553	GGGAACCGCATCACGTCTTGAACCACAGAGGA
Pseudomonas syringae	1	Pma4981	Pma4981|ALQ72_06154	Cluster_452.2	Type III Effector	Pma4981_Contig_209	-	9020	14893	5874	1957	ATGGTCAAGGTTACCTCTTCCGGATTTACTGCCAACCCTCTCTCTCATCATGCGGACAGTGTTTCCCCCGCGAACAGTCCCCCTCAGTTACCGGAGCCTGTGCCTCTGGTTGATCTAAGCGAGTCGTCCCGCAAGGGCGGCATGCGAAATCGGCCGCATGCCAGTTTGAACAGTCAGGTGCTCGAACTGCAAGCGGTGCCGTCGCAACGTGGTAAGCATGTTCGTGTCAGAAGTCATGCCGATGGCGAGAGTGTCATTAATGCCTGGCTGGCAAAGCGCCCCTCGGTTCAAAGCGAAACCAGTCTTGATAACGATGGCAAACTGGTGCGTTACACCCCCGTGAATCATGAGCCGCTGGCGCCGCGCAATGAGGCGTTTTTCACCTCTGTGCCGGGGATG…	MVKVTSSGFTANPLSHHADSVSPANSPPQLPEPVPLVDLSESSRKGGMRNRPHASLNSQVLELQAVPSQRGKHVRVRSHADGESVINAWLAKRPSVQSETSLDNDGKLVRYTPVNHEPLAPRNEAFFTSVPGMLMAVLTVHPEMEHGISGDITADAVAARLAEPPIGLLTGIWQSSHDRAYLERGGVVHTANMEERWAPLTLPGINPREPLRMAGLQADGGVYLHNGSQLWRLTETAAESVTTENLPEGAAVRIGAGGEVHGLHEGALHSNGISRPIELWRPKAGAPGREQSPARPVDLLPLPGGPAALILDDKGRIYHADLKGTGAVEAHRLKLPADFAQGKGWAVTAMGLSRDDTVHLMLQDQNGRRMSLQRAPGEALFRPAYLLDRPLLLLYTEGL…	173	-	15066	15097	CGGAACCGATCCGGTTGCCTGGCCACTCAATT
Pseudomonas syringae	1	Pma4981	Pma4981|ALQ72_100903	Cluster_24238.1	NA	Pma4981_Contig_171	-	107	232	126	41	ATGCGAGTATCAAACTGTTCAGCACCTGTGATCAAAAATATCATTCAAACATGTGCCGCCCACTCCACCTTGAGCAGTGTCGCCATCAAACTCCAAGTATCACATTACAAACGGAAAGCAAACTAG	MRVSNCSAPVIKNIIQTCAAHSTLSSVAIKLQVSHYKRKAN	25	-	257	289	TGGAACCACTGAAGAGTTTTAAGCCACTCAGTA
Pseudomonas syringae	1	Pma4981	Pma4981|ALQ72_200002	Cluster_63237.1	Type III Effector	Pma4981_Contig_272	+	642	1124	483	160	ATGGGAAACATATGTGTCGGCGGATCAAGCATGGCCCATCAGGTAAACTCTCCAGATAGAGTTAGTAACAGTGCTGGGGAAGATAATCAGACAACATCCCTTGATTTACGCAACCTCAGACTCAGGCTGGCAGAGTCGACCGACTTGCCTCCGAATGAGCATGCATTTCTGGGGCATGGGGGATCCGAAAGCCTGCGGACTCAATACAACAATCTTCGTCGGCAGACAGAACGAAACCTTGATGCGGCTGATATAGAACACAGGCACATGACGGGAATGTCGAGACACAGTTCGGGTACGCCGCTTAGTGAGCTTGTTAACACTCTGGAAAGCAATATAGCAGCTTGGGGTCAAATGCGTGGCAACCTACAGCGCGAAATGGGCGTGTCTGATGATAGT…	MGNICVGGSSMAHQVNSPDRVSNSAGEDNQTTSLDLRNLRLRLAESTDLPPNEHAFLGHGGSESLRTQYNNLRRQTERNLDAADIEHRHMTGMSRHSSGTPLSELVNTLESNIAAWGQMRGNLQREMGVSDDSPAPEQFHLVETPSGPSSSLAVPRPFRE	40	+	570	602	CGGAACCTAATCCGGCCCAAAGACCACTCAAAA
[truncated: 5,797 more rows]
